# Supplementary material for: Thiadiazino-indole, thiadiazino-carbazole and benzothiadiazino-carbazole dioxides: synthesis, physicochemical and early ADME characterization of representatives of new tri-, tetra- and pentacyclic ring systems and their intermediates
Source: publisher site journal article supplement (doi:10.3762/bjoc.21.169), 2025-10-21

You have not supplied any structure factors. As a result the full set of tests cannot be run.

No syntax errors found. CIF dictionary Interpreting this report

|                 |                |                    |               |
|-----------------|----------------|--------------------|---------------|
| Bond precision: | C-C = 0.0024 Å | Wavelength=1.54187 |               |
| Cell:           | a=8.6949 (6)   | b=11.6910 (7)      | c=15.5734 (9) |
|                 | alpha=90       | beta=101.302 (3)   | gamma=90      |
| Temperature:    | 293 K          |                    |               |

```
Correction method= # Reported T Limits: Tmin=0.616 Tmax=0.806
AbsCorr = MULTI-SCAN
```

```
R(reflections)= 0.0349( 9301)      wR2(reflections)=
S = 1.137                        0.0483( 9367)
Npar= 270
```

---

The following ALERTS were generated. Each ALERT has the format

**test-name\_ALERT\_alert-type\_alert-level.**

Click on the hyperlinks for more details of the test.

---

### Alert level A

PLAT097\_ALERT\_2\_A Large Reported Max. (Positive) Residual Density 3.77 eA-3

**Author Response: Although the residual density is out of border but there is no doubt about the chemical structure taking into account other evidences, e.g. NMR. The error maybe due to crystal imperfections.**

---

### Alert level B

DIFMN02\_ALERT\_2\_B The minimum difference density is < -0.1\*ZMAX\*1.00

\_refine\_diff\_density\_min given = -2.920

Test value = -1.600

REFLT02\_ALERT\_1\_B The number of reflections greater than the sigma threshold

cannot exceed the number of symmetry-independent reflections

Number of symmetry-independent reflections = 3003

Number of reflections greater than sigma threshold = 9301

PLAT098\_ALERT\_2\_B Large Reported Min. (Negative) Residual Density -2.92 eA-3

PLAT230\_ALERT\_2\_B Hirshfeld Test Diff for S1 --O2 . 21.3 s.u.

PLAT230\_ALERT\_2\_B Hirshfeld Test Diff for S1 --O3 . 13.4 s.u.

PLAT230\_ALERT\_2\_B Hirshfeld Test Diff for S1 --N4 . 12.1 s.u.

PLAT230\_ALERT\_2\_B Hirshfeld Test Diff for C8 --C15 . 8.5 s.u.

PLAT230\_ALERT\_2\_B Hirshfeld Test Diff for C19 --C20 . 12.3 s.u.

---

### Alert level C

DIFMN03\_ALERT\_1\_C The minimum difference density is < -0.1\*ZMAX\*0.75

The relevant atom site should be identified.

DIFMX02\_ALERT\_1\_C The maximum difference density is > 0.1\*ZMAX\*0.75

The relevant atom site should be identified.

PLAT166\_ALERT\_4\_C S.U's Given on Coordinates for Calc-flagged .... H1 Note

PLAT166\_ALERT\_4\_C S.U's Given on Coordinates for Calc-flagged .... H2 Note

PLAT166\_ALERT\_4\_C S.U's Given on Coordinates for Calc-flagged .... H3 Note

PLAT166\_ALERT\_4\_C S.U's Given on Coordinates for Calc-flagged .... H4 Note

PLAT166\_ALERT\_4\_C S.U's Given on Coordinates for Calc-flagged .... H5 Note

PLAT166\_ALERT\_4\_C S.U's Given on Coordinates for Calc-flagged .... H6 Note

PLAT166\_ALERT\_4\_C S.U's Given on Coordinates for Calc-flagged .... H7 Note

PLAT166\_ALERT\_4\_C S.U's Given on Coordinates for Calc-flagged .... H8 Note

PLAT166\_ALERT\_4\_C S.U's Given on Coordinates for Calc-flagged .... H9 Note

PLAT166\_ALERT\_4\_C S.U's Given on Coordinates for Calc-flagged .... H10 Note

PLAT166\_ALERT\_4\_C S.U's Given on Coordinates for Calc-flagged .... H11 Note

PLAT166\_ALERT\_4\_C S.U's Given on Coordinates for Calc-flagged .... H12 Note

PLAT166\_ALERT\_4\_C S.U's Given on Coordinates for Calc-flagged .... H13 Note

PLAT166\_ALERT\_4\_C S.U's Given on Coordinates for Calc-flagged .... H14 Note

PLAT166\_ALERT\_4\_C S.U's Given on Coordinates for Calc-flagged .... H15 Note

PLAT166\_ALERT\_4\_C S.U's Given on Coordinates for Calc-flagged .... H16 Note

PLAT166\_ALERT\_4\_C S.U's Given on Coordinates for Calc-flagged .... H17 Note

PLAT166\_ALERT\_4\_C S.U's Given on Coordinates for Calc-flagged .... H18 Note

PLAT166\_ALERT\_4\_C S.U's Given on Coordinates for Calc-flagged .... H19 Note

|                   |                                                  |  |       |        |
|-------------------|--------------------------------------------------|--|-------|--------|
| PLAT166_ALERT_4_C | S.U's Given on Coordinates for Calc-flagged .... |  | H20   | Note   |
| PLAT222_ALERT_3_C | NonSolvent Resd 1 H Uiso(max)/Uiso(min) Range    |  | 6.4   | Ratio  |
| PLAT230_ALERT_2_C | Hirshfeld Test Diff for S1 --C8 .                |  | 6.8   | s.u.   |
| PLAT230_ALERT_2_C | Hirshfeld Test Diff for C12 --C14 .              |  | 6.8   | s.u.   |
| PLAT245_ALERT_2_C | U(iso) H3 Smaller than U(eq) C16 by              |  | 0.012 | Ang**2 |
| PLAT351_ALERT_3_C | Long C-H (X0.96,N1.08A) C20 - H18 .              |  | 1.14  | Ang.   |
| PLAT703_ALERT_1_C | Torsion Calc 36.71(14), Rep 36.56(18), Dev..     |  | 1.07  | Sigma  |
|                   | O(3)-S(1)-C(8)-C(15 1_555 1_555 1_555 1_555 #    |  | 8     | Check  |
| PLAT703_ALERT_1_C | Torsion Calc -178.75(14), Rep -178.9(2), Dev..   |  | 1.07  | Sigma  |
|                   | C(18-N(4)-N(5)-C(10 1_555 1_555 1_555 1_555 #    |  | 14    | Check  |
| PLAT703_ALERT_1_C | Torsion Calc 179.18(14), Rep 179.0(2), Dev..     |  | 1.29  | Sigma  |
|                   | N(6)-N(7)-C(11-C(13 1_555 1_555 1_555 1_555 #    |  | 20    | Check  |

---

### Alert level G

|                   |                                                  |              |
|-------------------|--------------------------------------------------|--------------|
| PLAT005_ALERT_5_G | No Embedded Refinement Details Found in the CIF  | Please Do !  |
| PLAT066_ALERT_1_G | Predicted and Reported Tmin&Tmax Range Identical | ? Check      |
| PLAT199_ALERT_1_G | Reported _cell_measurement_temperature ..... (K) | 293 Check    |
| PLAT200_ALERT_1_G | Reported _diffn_ambient_temperature ..... (K)    | 293 Check    |
| PLAT808_ALERT_5_G | No Parseable SHELXL Style Weighting Scheme Found | Please Check |
| PLAT882_ALERT_1_G | No Datum for _diffn_reflms_av_unetI/netI .....   | Please Do !  |
| PLAT883_ALERT_1_G | Absent Datum for _atom_sites_solution_primary .. | Please Do !  |

- 
- 1 **ALERT level A** = Most likely a serious problem - resolve or explain
  - 8 **ALERT level B** = A potentially serious problem, consider carefully
  - 30 **ALERT level C** = Check. Ensure it is not caused by an omission or oversight
  - 7 **ALERT level G** = General information/check it is not something unexpected
  
  - 11 ALERT type 1 CIF construction/syntax error, inconsistent or missing data
  - 11 ALERT type 2 Indicator that the structure model may be wrong or deficient
  - 2 ALERT type 3 Indicator that the structure quality may be low
  - 20 ALERT type 4 Improvement, methodology, query or suggestion
  - 2 ALERT type 5 Informative message, check
-

It is advisable to attempt to resolve as many as possible of the alerts in all categories. Often the minor alerts point to easily fixed oversights, errors and omissions in your CIF or refinement strategy, so attention to these fine details can be worthwhile. In order to resolve some of the more serious problems it may be necessary to carry out additional measurements or structure refinements. However, the purpose of your study may justify the reported deviations and the more serious of these should normally be commented upon in the discussion or experimental section of a paper or in the "special\_details" fields of the CIF. checkCIF was carefully designed to identify outliers and unusual parameters, but every test has its limitations and alerts that are not important in a particular case may appear. Conversely, the absence of alerts does not guarantee there are no aspects of the results needing attention. It is up to the individual to critically assess their own results and, if necessary, seek expert advice.

### **Publication of your CIF in IUCr journals**

A basic structural check has been run on your CIF. These basic checks will be run on all CIFs submitted for publication in IUCr journals (*Acta Crystallographica*, *Journal of Applied Crystallography*, *Journal of Synchrotron Radiation*); however, if you intend to submit to *Acta Crystallographica Section C* or *E* or *IUCrData*, you should make sure that full publication checks are run on the final version of your CIF prior to submission.

### **Publication of your CIF in other journals**

Please refer to the *Notes for Authors* of the relevant journal for any special instructions relating to CIF submission.

### **Validation response form**

Please find below a validation response form (VRF) that can be filled in and pasted into your CIF.

```
# start Validation Reply Form
_vrf_DIFMN02__144200_1
;
PROBLEM: The minimum difference density is < -0.1*ZMAX*1.00
RESPONSE: ...
;
_vrf_REFLT02__144200_1
;
PROBLEM: The number of reflections greater than the sigma threshold
RESPONSE: ...
;
_vrf_DIFMN03__144200_1
;
PROBLEM: The minimum difference density is < -0.1*ZMAX*0.75
RESPONSE: ...
;
_vrf_DIFMX02__144200_1
;
PROBLEM: The maximum difference density is > 0.1*ZMAX*0.75
RESPONSE: ...
;
_vrf_PLAT098__144200_1
```

```

;
PROBLEM: Large Reported Min. (Negative) Residual Density -2.92 eA-3
RESPONSE: ...
;
_vrf_PLAT230__144200_1
;
PROBLEM: Hirshfeld Test Diff for S1 --O2 . 21.3 s.u.
RESPONSE: ...
;
_vrf_PLAT166__144200_1
;
PROBLEM: S.U's Given on Coordinates for Calc-flagged .... H1 Note
RESPONSE: ...
;
_vrf_PLAT222__144200_1
;
PROBLEM: NonSolvent Resd 1 H Uiso(max)/Uiso(min) Range 6.4 Ratio
RESPONSE: ...
;
_vrf_PLAT245__144200_1
;
PROBLEM: U(iso) H3 Smaller than U(eq) C16 by 0.012 Ang**2
RESPONSE: ...
;
_vrf_PLAT351__144200_1
;
PROBLEM: Long C-H (X0.96,N1.08A) C20 - H18 . 1.14 Ang.
RESPONSE: ...
;
_vrf_PLAT703__144200_1
;
PROBLEM: Torsion Calc 36.71(14), Rep 36.56(18), Dev.. 1.07 Sigma
RESPONSE: ...
;
# end Validation Reply Form

```

---

**PLATON version of 02/02/2025; check.def file version of 02/02/2025**

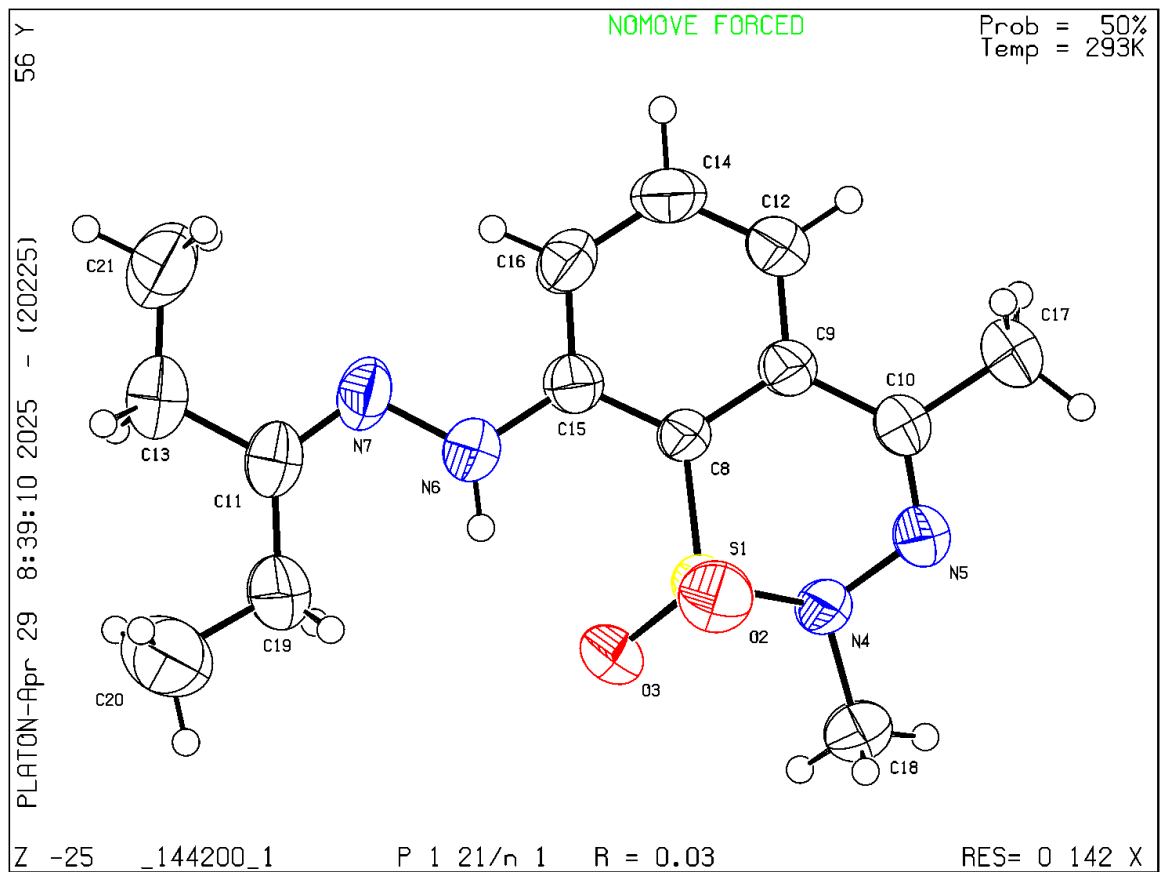

Supplement: Additional file 2 [file 7b_checkcif.pdf › Átnevezett XRD/7b_checkcif.pdf]
