# Supplementary material for: Thiadiazino-indole, thiadiazino-carbazole and benzothiadiazino-carbazole dioxides: synthesis, physicochemical and early ADME characterization of representatives of new tri-, tetra- and pentacyclic ring systems and their intermediates
Source: publisher site journal article supplement (doi:10.3762/bjoc.21.169), 2025-10-21

## checkCIF/PLATON report

You have not supplied any structure factors. As a result the full set of tests cannot be run.

THIS REPORT IS FOR GUIDANCE ONLY. IF USED AS PART OF A REVIEW PROCEDURE FOR PUBLICATION, IT SHOULD NOT REPLACE THE EXPERTISE OF AN EXPERIENCED CRYSTALLOGRAPHIC REFEREE.

No syntax errors found.      CIF dictionary      Interpreting this report

### Datablock: \_142698\_1

---

Bond precision:      C-C = 0.0150 Å      Wavelength=1.54187

Cell:                  a=8.5535(15)                  b=12.697(3)                  c=13.488(3)  
                         alpha=89.323(11)                  beta=89.449(9)                  gamma=86.785(11)

Temperature:      293 K

|                        | Calculated                             | Reported        |
|------------------------|----------------------------------------|-----------------|
| Volume                 | 1462.4(5)                              | 1462.3(5)       |
| Space group            | P -1                                   | P -1            |
| Hall group             | -P 1                                   | -P 1            |
| Moiety formula         | C13 H18 N4 O2 S, C12 H15 N4 O2 S, C H3 | C13 H18 N4 O2 S |
| Sum formula            | C26 H36 N8 O4 S2                       | C13 H18 N4 O2 S |
| Mr                     | 588.75                                 | 294.37          |
| Dx, g cm <sup>-3</sup> | 1.337                                  | 1.337           |
| Z                      | 2                                      | 4               |
| Mu (mm <sup>-1</sup> ) | 2.038                                  | 2.038           |
| F000                   | 624.0                                  | 624.0           |
| F000'                  | 627.04                                 |                 |
| h,k,lmax               | 10,15,16                               | 10,15,16        |
| Nref                   | 5732                                   | 5193            |
| Tmin,Tmax              | 0.660,0.832                            | 0.622,0.836     |
| Tmin'                  | 0.496                                  |                 |

Correction method= # Reported T Limits: Tmin=0.622 Tmax=0.836  
AbsCorr = MULTI-SCAN

Data completeness= 0.906      Theta(max)= 71.620

R(reflections)= 0.0634( 6795)

wR2(reflections)=  
wR= 0.0767( 6866)

S = 0.937

Npar= 397

---

The following ALERTS were generated. Each ALERT has the format

**test-name\_ALERT\_alert-type\_alert-level.**

Click on the hyperlinks for more details of the test.

---

### Alert level A

DIFMN02\_ALERT\_2\_A The minimum difference density is < -0.1\*ZMAX\*2.00  
\_refine\_diff\_density\_min given = -6.190  
Test value = -3.200

**Author Response: Although the residual density is out of border but there is no doubt about the chemical structure taking into account other evidences, e.g. NMR. The error maybe due to crystal imperfections.**

PLAT029\_ALERT\_3\_A \_diffn\_measured\_fraction\_theta\_full value Low . 0.906 Why?

**Author Response: Although some large-theta reflexions are too weak but there is no doubt about the chemical structure taking into account other evidences, e.g. NMR. The error maybe due to crystal imperfections.**

PLAT098\_ALERT\_2\_A Large Reported Min. (Negative) Residual Density -6.19 eA-3

**Author Response: Although the residual density is out of border but there is no doubt about the chemical structure taking into account other evidences, e.g. NMR. The error maybe due to crystal imperfections.**

PLAT211\_ALERT\_2\_A ADP of Atom C31 is N.P.D. or (nearly) 2D . Please Check

**Author Response: The structure is affected by some strain. Crystal imperfections can not be excluded either.**

---

### Alert level B

REFLT02\_ALERT\_1\_B The number of reflections greater than the sigma threshold  
cannot exceed the number of symmetry-independent reflections  
Number of symmetry-independent reflections = 5193  
Number of reflections greater than sigma threshold = 6795  
PLAT097\_ALERT\_2\_B Large Reported Max. (Positive) Residual Density 3.09 eA-3  
PLAT110\_ALERT\_2\_B ADDSYM Detects Potential Lattice Translation ... ? Check  
PLAT112\_ALERT\_2\_B ADDSYM Detects New (Pseudo) Symm. Elem B 100 %Fit  
PLAT113\_ALERT\_2\_B ADDSYM Suggests Possible Pseudo/New Space Group P-1 Check  
Check Model Parameter Symmetry for Reflection Data Support  
PLAT213\_ALERT\_2\_B Atom O4 has ADP max/min Ratio ..... 4.6 prolat  
PLAT230\_ALERT\_2\_B Hirshfeld Test Diff for S2 --O3 . 23.3 s.u.  
PLAT230\_ALERT\_2\_B Hirshfeld Test Diff for S2 --C1 . 9.0 s.u.  
PLAT230\_ALERT\_2\_B Hirshfeld Test Diff for N11 --C24 . 8.9 s.u.  
PLAT230\_ALERT\_2\_B Hirshfeld Test Diff for N14 --C26 . 9.8 s.u.  
PLAT230\_ALERT\_2\_B Hirshfeld Test Diff for C26 --C27 . 8.2 s.u.

|                   |                                               |     |       |           |            |
|-------------------|-----------------------------------------------|-----|-------|-----------|------------|
| PLAT230_ALERT_2_B | Hirshfeld Test Diff for                       | C29 | --C31 | .         | 11.5 s.u.  |
| PLAT230_ALERT_2_B | Hirshfeld Test Diff for                       | S1  | --O6  | .         | 8.3 s.u.   |
| PLAT230_ALERT_2_B | Hirshfeld Test Diff for                       | N1  | --C36 | .         | 9.4 s.u.   |
| PLAT230_ALERT_2_B | Hirshfeld Test Diff for                       | N10 | --C19 | .         | 8.0 s.u.   |
| PLAT230_ALERT_2_B | Hirshfeld Test Diff for                       | N13 | --C22 | .         | 9.8 s.u.   |
| PLAT230_ALERT_2_B | Hirshfeld Test Diff for                       | C17 | --C19 | .         | 7.8 s.u.   |
| PLAT230_ALERT_2_B | Hirshfeld Test Diff for                       | C22 | --C33 | .         | 7.4 s.u.   |
| PLAT242_ALERT_2_B | Low 'MainMol' Ueq as Compared to Neighbors of |     |       | C36 Check |            |
| PLAT340_ALERT_3_B | Low Bond Precision on C-C Bonds .....         |     |       |           | 0.015 Ang. |
| PLAT374_ALERT_2_B | Long N - N Bond N1 - N13                      |     |       |           | 1.61 Ang.  |

### Alert level C

DIFMN03\_ALERT\_1\_C The minimum difference density is < -0.1\*ZMAX\*0.75  
The relevant atom site should be identified.

DIFMX02\_ALERT\_1\_C The maximum difference density is > 0.1\*ZMAX\*0.75  
The relevant atom site should be identified.

PLAT041\_ALERT\_1\_C Calc. and Reported SumFormula Strings Differ Please Check  
Calc: C26 H36 N8 O4 S2  
Rep.: C13 H18 N4 O2 S

PLAT042\_ALERT\_1\_C Calc. and Reported MoietyFormula Strings Differ Please Check  
Calc: C13 H18 N4 O2 S, C12 H15 N4 O2 S, C H3  
Rep.: C13 H18 N4 O2 S

PLAT213\_ALERT\_2\_C Atom C30 has ADP max/min Ratio ..... 3.3 oblate

PLAT214\_ALERT\_2\_C Atom C19 (Anion/Solvent) ADP max/min Ratio 4.4 oblate

PLAT220\_ALERT\_2\_C NonSolvent Resd 1 C Ueq(max)/Ueq(min) Range 4.3 Ratio

PLAT230\_ALERT\_2\_C Hirshfeld Test Diff for S2 --O4 . 6.0 s.u.

PLAT230\_ALERT\_2\_C Hirshfeld Test Diff for N7 --C31 . 6.5 s.u.

PLAT230\_ALERT\_2\_C Hirshfeld Test Diff for N11 --N14 . 6.0 s.u.

PLAT230\_ALERT\_2\_C Hirshfeld Test Diff for C18 --C23 . 5.6 s.u.

PLAT230\_ALERT\_2\_C Hirshfeld Test Diff for C18 --C31 . 5.3 s.u.

PLAT230\_ALERT\_2\_C Hirshfeld Test Diff for C24 --C30 . 5.3 s.u.

PLAT230\_ALERT\_2\_C Hirshfeld Test Diff for C21 --C33 . 5.2 s.u.

PLAT234\_ALERT\_4\_C Large Hirshfeld Difference C23 --C28 . 0.17 Ang.

PLAT234\_ALERT\_4\_C Large Hirshfeld Difference C24 --C40 . 0.18 Ang.

PLAT234\_ALERT\_4\_C Large Hirshfeld Difference C27 --C28 . 0.16 Ang.

PLAT241\_ALERT\_2\_C High 'MainMol' Ueq as Compared to Neighbors of N14 Check

PLAT241\_ALERT\_2\_C High 'MainMol' Ueq as Compared to Neighbors of C24 Check

PLAT241\_ALERT\_2\_C High 'MainMol' Ueq as Compared to Neighbors of N1 Check

PLAT242\_ALERT\_2\_C Low 'MainMol' Ueq as Compared to Neighbors of N11 Check

PLAT242\_ALERT\_2\_C Low 'MainMol' Ueq as Compared to Neighbors of C26 Check

PLAT242\_ALERT\_2\_C Low 'MainMol' Ueq as Compared to Neighbors of C31 Check

PLAT242\_ALERT\_2\_C Low 'MainMol' Ueq as Compared to Neighbors of C40 Check

PLAT362\_ALERT\_2\_C Short C(sp3)-C(sp2) Bond C29 - C31 . 1.32 Ang.

PLAT369\_ALERT\_2\_C Long C(sp2)-C(sp2) Bond C1 - C26 . 1.56 Ang.

PLAT369\_ALERT\_2\_C Long C(sp2)-C(sp2) Bond C21 - C25 . 1.54 Ang.

PLAT369\_ALERT\_2\_C Long C(sp2)-C(sp2) Bond C22 - C33 . 1.55 Ang.

PLAT412\_ALERT\_2\_C Short Intra XH3 .. XHn H4 ..H17 . 1.89 Ang.

PLAT414\_ALERT\_2\_C Short Intra D-H..H-X H1 ..H33 . 1.95 Ang.

x,y,z = 1\_555 Check

x,y,z = 1\_555 Check

### Alert level G

PLAT005\_ALERT\_5\_G No Embedded Refinement Details Found in the CIF Please Do !

PLAT007\_ALERT\_5\_G Number of Unrefined Donor-H Atoms ..... 2 Report

H2 H1

|                   |                                                  |       |              |
|-------------------|--------------------------------------------------|-------|--------------|
| PLAT045_ALERT_1_G | Calculated and Reported Z Differ by a Factor ... | 0.500 | Check        |
| PLAT116_ALERT_2_G | ADDSYM Included (Pseudo) Lattice Translation ... |       | Please Check |
| PLAT199_ALERT_1_G | Reported _cell_measurement_temperature ..... (K) | 293   | Check        |
| PLAT200_ALERT_1_G | Reported _diffn_ambient_temperature ..... (K)    | 293   | Check        |
| PLAT335_ALERT_2_G | Check Large C6 Ring C-C Range C1 -C26            | 0.32  | Ang.         |
| PLAT335_ALERT_2_G | Check Large C6 Ring C-C Range C15 -C22           | 0.32  | Ang.         |
| PLAT343_ALERT_2_G | Unusual sp? Angle Range in Main Residue for      | C19   | Check        |
| PLAT344_ALERT_2_G | Unusual sp? Angle Range in Solvent/Ion for       | C32   | Check        |
| PLAT432_ALERT_2_G | Short Inter X...Y Contact N10 ..C32 .            | 2.51  | Ang.         |
|                   | x,y,z =                                          | 1_555 | Check        |
| PLAT432_ALERT_2_G | Short Inter X...Y Contact C17 ..C32 .            | 2.78  | Ang.         |
|                   | x,y,z =                                          | 1_555 | Check        |
| PLAT432_ALERT_2_G | Short Inter X...Y Contact C19 ..C32 .            | 1.76  | Ang.         |
|                   | x,y,z =                                          | 1_555 | Check        |
| PLAT432_ALERT_2_G | Short Inter X...Y Contact C25 ..C32 .            | 2.91  | Ang.         |
|                   | x,y,z =                                          | 1_555 | Check        |
| PLAT773_ALERT_2_G | Check long C-C Bond in CIF: C19 --C32            | 1.76  | Ang.         |
| PLAT790_ALERT_4_G | Centre of Gravity not Within Unit Cell: Resd. #  | 2     | Note         |
|                   | C12 H15 N4 O2 S                                  |       |              |
| PLAT790_ALERT_4_G | Centre of Gravity not Within Unit Cell: Resd. #  | 3     | Note         |
|                   | C H3                                             |       |              |
| PLAT808_ALERT_5_G | No Parseable SHELXL Style Weighting Scheme Found |       | Please Check |
| PLAT882_ALERT_1_G | No Datum for _diffn_reflms_av_unetI/netI .....   |       | Please Do !  |
| PLAT883_ALERT_1_G | Absent Datum for _atom_sites_solution_primary .. |       | Please Do !  |

---

4 **ALERT level A** = Most likely a serious problem - resolve or explain  
 21 **ALERT level B** = A potentially serious problem, consider carefully  
 30 **ALERT level C** = Check. Ensure it is not caused by an omission or oversight  
 20 **ALERT level G** = General information/check it is not something unexpected

10 ALERT type 1 CIF construction/syntax error, inconsistent or missing data  
 55 ALERT type 2 Indicator that the structure model may be wrong or deficient  
 2 ALERT type 3 Indicator that the structure quality may be low  
 5 ALERT type 4 Improvement, methodology, query or suggestion  
 3 ALERT type 5 Informative message, check

---

It is advisable to attempt to resolve as many as possible of the alerts in all categories. Often the minor alerts point to easily fixed oversights, errors and omissions in your CIF or refinement strategy, so attention to these fine details can be worthwhile. In order to resolve some of the more serious problems it may be necessary to carry out additional measurements or structure refinements. However, the purpose of your study may justify the reported deviations and the more serious of these should normally be commented upon in the discussion or experimental section of a paper or in the "special\_details" fields of the CIF. checkCIF was carefully designed to identify outliers and unusual parameters, but every test has its limitations and alerts that are not important in a particular case may appear. Conversely, the absence of alerts does not guarantee there are no aspects of the results needing attention. It is up to the individual to critically assess their own results and, if necessary, seek expert advice.

### **Publication of your CIF in IUCr journals**

A basic structural check has been run on your CIF. These basic checks will be run on all CIFs submitted for publication in IUCr journals (*Acta Crystallographica*, *Journal of Applied Crystallography*, *Journal of Synchrotron Radiation*); however, if you intend to submit to *Acta Crystallographica Section C* or *E* or *IUCrData*, you should make sure that full publication checks are run on the final version of your CIF prior to submission.

### **Publication of your CIF in other journals**

Please refer to the *Notes for Authors* of the relevant journal for any special instructions relating to CIF submission.

### **Validation response form**

Please find below a validation response form (VRF) that can be filled in and pasted into your CIF.

```
# start Validation Reply Form
_vrf_REFLT02__142698_1
;
PROBLEM: The number of reflections greater than the sigma threshold
RESPONSE: ...
;
_vrf_DIFMN03__142698_1
;
PROBLEM: The minimum difference density is < -0.1*ZMAX*0.75
RESPONSE: ...
;
_vrf_DIFMX02__142698_1
;
PROBLEM: The maximum difference density is > 0.1*ZMAX*0.75
RESPONSE: ...
;
_vrf_PLAT097__142698_1
;
PROBLEM: Large Reported Max. (Positive) Residual Density      3.09 eA-3
RESPONSE: ...
;
_vrf_PLAT110__142698_1
```

```

;
PROBLEM: ADDSYM Detects Potential Lattice Translation ...           ? Check
RESPONSE: ...
;
_vrf_PLAT112__142698_1
;
PROBLEM: ADDSYM Detects New (Pseudo) Symm. Elem           B           100 %Fit
RESPONSE: ...
;
_vrf_PLAT113__142698_1
;
PROBLEM: ADDSYM Suggests Possible Pseudo/New Space Group       P-1 Check
RESPONSE: ...
;
_vrf_PLAT213__142698_1
;
PROBLEM: Atom O4                has ADP max/min Ratio ..... 4.6 prolat
RESPONSE: ...
;
_vrf_PLAT230__142698_1
;
PROBLEM: Hirshfeld Test Diff for      S2          --O3          . 23.3 s.u.
RESPONSE: ...
;
_vrf_PLAT242__142698_1
;
PROBLEM: Low      'MainMol' Ueq as Compared to Neighbors of       C36 Check
RESPONSE: ...
;
_vrf_PLAT340__142698_1
;
PROBLEM: Low Bond Precision on  C-C Bonds ..... 0.015 Ang.
RESPONSE: ...
;
_vrf_PLAT374__142698_1
;
PROBLEM: Long      N - N                Bond  N1          - N13          . 1.61 Ang.
RESPONSE: ...
;
_vrf_PLAT041__142698_1
;
PROBLEM: Calc. and Reported SumFormula      Strings Differ       Please Check
RESPONSE: ...
;
_vrf_PLAT042__142698_1
;
PROBLEM: Calc. and Reported MoietyFormula Strings Differ       Please Check
RESPONSE: ...
;
_vrf_PLAT214__142698_1
;
PROBLEM: Atom C19                (Anion/Solvent) ADP max/min Ratio 4.4 oblate
RESPONSE: ...
;
_vrf_PLAT220__142698_1
;
PROBLEM: NonSolvent  Resd 1  C      Ueq(max)/Ueq(min) Range       4.3 Ratio

```

```

RESPONSE: ...
;
_vrf_PLAT234__142698_1
;
PROBLEM: Large Hirshfeld Difference C23      --C28      .      0.17 Ang.
RESPONSE: ...
;
_vrf_PLAT241__142698_1
;
PROBLEM: High      'MainMol' Ueq as Compared to Neighbors of      N14 Check
RESPONSE: ...
;
_vrf_PLAT362__142698_1
;
PROBLEM: Short  C(sp3)-C(sp2) Bond  C29      - C31      .      1.32 Ang.
RESPONSE: ...
;
_vrf_PLAT369__142698_1
;
PROBLEM: Long   C(sp2)-C(sp2) Bond  C1       - C26      .      1.56 Ang.
RESPONSE: ...
;
_vrf_PLAT412__142698_1
;
PROBLEM: Short Intra XH3 .. XHn      H4       ..H17      .      1.89 Ang.
RESPONSE: ...
;
_vrf_PLAT414__142698_1
;
PROBLEM: Short Intra D-H..H-X      H1       ..H33      .      1.95 Ang.
RESPONSE: ...
;
# end Validation Reply Form

```

---

**PLATON version of 02/02/2025; check.def file version of 02/02/2025**

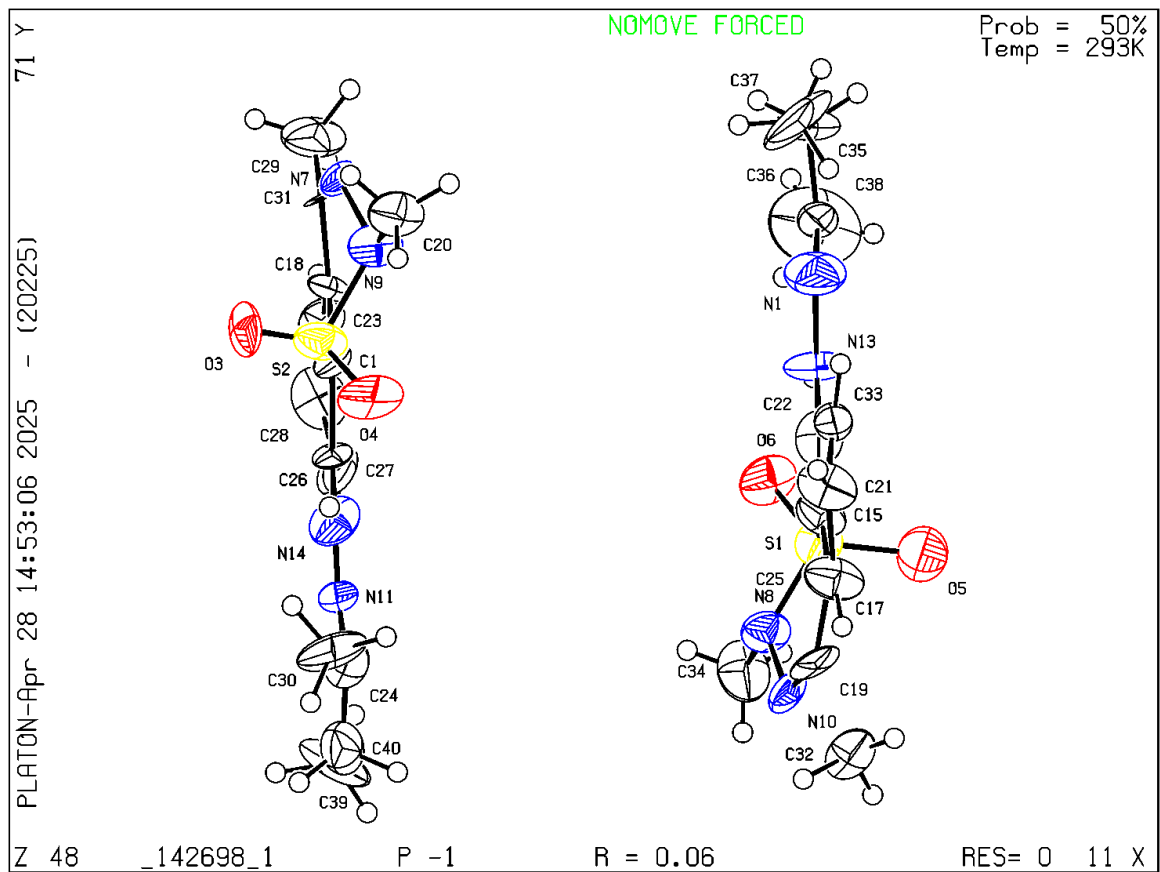

Supplement: Additional file 2 [file 7a_checkcif.pdf › Átnevezett XRD/7a_checkcif.pdf]
