# Supplementary material for: Thiadiazino-indole, thiadiazino-carbazole and benzothiadiazino-carbazole dioxides: synthesis, physicochemical and early ADME characterization of representatives of new tri-, tetra- and pentacyclic ring systems and their intermediates
Source: publisher site journal article supplement (doi:10.3762/bjoc.21.169), 2025-10-21

You have not supplied any structure factors. As a result the full set of tests cannot be run.

No syntax errors found. CIF dictionary Interpreting this report

|                 |                |                    |              |  |
|-----------------|----------------|--------------------|--------------|--|
| Bond precision: | C-C = 0.0042 A | Wavelength=1.54187 |              |  |
| Cell:           | a=11.4934(5)   | b=8.9477(4)        | c=17.3845(8) |  |
|                 | alpha=90       | beta=103.493(3)    | gamma=90     |  |
| Temperature:    | 293 K          |                    |              |  |

```
Correction method= # Reported T Limits: Tmin=0.358 Tmax=0.746
AbsCorr = MULTI-SCAN
```

```
R(reflections)= 0.0885( 10447)      wR2(reflections)=
S = 0.981                          0.1484( 10568)
Npar= 245
```

---

The following ALERTS were generated. Each ALERT has the format

**test-name\_ALERT\_alert-type\_alert-level.**

Click on the hyperlinks for more details of the test.

---

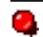

#### **Alert level A**

DIFMN02\_ALERT\_2\_A The minimum difference density is  $< -0.1 \times Z_{\text{MAX}} \times 2.00$   
\_refine\_diff\_density\_min given = -9.740  
Test value = -3.200

**Author Response: Although the residual density is out of border but there is no doubt about the chemical structure taking into account other evidences, e.g. NMR. The error maybe due to crystal imperfections.**

PLAT097\_ALERT\_2\_A Large Reported Max. (Positive) Residual Density 7.91 eA-3

**Author Response: Although the residual density is out of border but there is no doubt about the chemical structure taking into account other evidences, e.g. NMR. The error maybe due to crystal imperfections.**

PLAT098\_ALERT\_2\_A Large Reported Min. (Negative) Residual Density -9.74 eA-3

**Author Response: Although the residual density is out of border but there is no doubt about the chemical structure taking into account other evidences, e.g. NMR. The error maybe due to crystal imperfections.**

PLAT703\_ALERT\_1\_A Torsion Calc -149.0(2), Rep -148.0(5), Dev.. 5.00 Sigma  
O(2)-S(1)-C(10-C(11 1\_555 1\_555 1\_555 1\_555 # 3 Check

**Author Response: The structure is affected by some strain. Crystal imperfections can not be excluded either.**

PLAT703\_ALERT\_1\_A Torsion Calc -94.8(2), Rep -95.5(6), Dev.. 3.50 Sigma  
O(3)-S(1)-C(10-C(17 1\_555 1\_555 1\_555 1\_555 # 8 Check

**Author Response: The structure is affected by some strain. Crystal imperfections can not be excluded either.**

PLAT703\_ALERT\_1\_A Torsion Calc 148.8(2), Rep 147.9(6), Dev.. 4.50 Sigma  
N(1)-S(1)-C(10-C(17 1\_555 1\_555 1\_555 1\_555 # 10 Check

**Author Response: The structure is affected by some strain. Crystal imperfections can not be excluded either.**

PLAT703\_ALERT\_1\_A Torsion Calc    -1.2(3), Rep    -0.2(6), Dev..    3.33 Sigma  
C(17-N(4)-C(14-C(13    1\_555    1\_555    1\_555    1\_555    #    17 Check

**Author Response: The structure is affected by some strain. Crystal imperfections can not be excluded either.**

PLAT703\_ALERT\_1\_A Torsion Calc    -179.3(2), Rep    -178.6(6), Dev..    3.50 Sigma  
C(17-N(4)-C(14-C(18    1\_555    1\_555    1\_555    1\_555    #    18 Check

**Author Response: The structure is affected by some strain. Crystal imperfections can not be excluded either.**

PLAT703\_ALERT\_1\_A Torsion Calc    -175.8(2), Rep    -174.0(5), Dev..    9.00 Sigma  
N(1)-N(5)-C(12-C(15    1\_555    1\_555    1\_555    1\_555    #    20 Check

**Author Response: The structure is affected by some strain. Crystal imperfections can not be excluded either.**

PLAT703\_ALERT\_1\_A Torsion Calc    -178.4(3), Rep    -177.3(7), Dev..    3.67 Sigma  
C(13-C(1)-C(8)-C(9)    1\_555    1\_555    1\_555    1\_555    #    23 Check

**Author Response: The structure is affected by some strain. Crystal imperfections can not be excluded either.**

PLAT703\_ALERT\_1\_A Torsion Calc    -174.9(2), Rep    -176.3(5), Dev..    7.00 Sigma  
S(1)-C(10-C(11-C(9)    1\_555    1\_555    1\_555    1\_555    #    34 Check

**Author Response: The structure is affected by some strain. Crystal imperfections can not be excluded either.**

PLAT703\_ALERT\_1\_A Torsion Calc    175.8(2), Rep    176.7(5), Dev..    4.50 Sigma  
S(1)-C(10-C(17-C(1)    1\_555    1\_555    1\_555    1\_555    #    37 Check

**Author Response: The structure is affected by some strain. Crystal imperfections can not be excluded either.**

PLAT703\_ALERT\_1\_A Torsion Calc    -161.4(3), Rep    -160.1(7), Dev..    4.33 Sigma  
C(9)-C(11-C(12-N(5)    1\_555    1\_555    1\_555    1\_555    #    42 Check

**Author Response: The structure is affected by some strain. Crystal imperfections can not be excluded either.**

PLAT703\_ALERT\_1\_A Torsion Calc    -168.3(3), Rep    -169.3(6), Dev..    3.33 Sigma  
C(10-C(11-C(12-C(15    1\_555    1\_555    1\_555    1\_555    #    45 Check

**Author Response: The structure is affected by some strain. Crystal imperfections can not be excluded either.**

PLAT703\_ALERT\_1\_A Torsion Calc 87.2(3), Rep 86.1(7), Dev.. 3.67 Sigma  
N(5)-C(12)-C(15)-C(23) 1\_555 1\_555 1\_555 1\_555 # 47 Check

**Author Response: The structure is affected by some strain. Crystal imperfections can not be excluded either.**

PLAT703\_ALERT\_1\_A Torsion Calc -0.1(3), Rep -1.1(8), Dev.. 3.33 Sigma  
C(1)-C(13)-C(14)-N(4) 1\_555 1\_555 1\_555 1\_555 # 50 Check

**Author Response: The structure is affected by some strain. Crystal imperfections can not be excluded either.**

PLAT703\_ALERT\_1\_A Torsion Calc -178.6(3), Rep -179.7(6), Dev.. 3.67 Sigma  
C(16)-C(13)-C(14)-N(4) 1\_555 1\_555 1\_555 1\_555 # 52 Check

**Author Response: The structure is affected by some strain. Crystal imperfections can not be excluded either.**

PLAT703\_ALERT\_1\_A Torsion Calc -127.3(3), Rep -126.0(6), Dev.. 4.33 Sigma  
N(4)-C(14)-C(18)-C(22) 1\_555 1\_555 1\_555 1\_555 # 54 Check

**Author Response: The structure is affected by some strain. Crystal imperfections can not be excluded either.**

PLAT733\_ALERT\_1\_A Torsion Calc 179.1(3), Rep -180.00(2) ..... 9.90 s.u.-R  
C(8)-C(1)-C(17)-N(4) 1\_555 1\_555 1\_555 1\_555 # 24 Check

**Author Response: The structure is affected by some strain. Crystal imperfections can not be excluded either.**

---

**🔴 Alert level B**

REFLT02\_ALERT\_1\_B The number of reflections greater than the sigma threshold  
cannot exceed the number of symmetry-independent reflections  
Number of symmetry-independent reflections = 3328  
Number of reflections greater than sigma threshold = 10447

PLAT213\_ALERT\_2\_B Atom C10 has ADP max/min Ratio ..... 4.9 oblate  
PLAT230\_ALERT\_2\_B Hirshfeld Test Diff for S1 --C10 . 8.0 s.u.  
PLAT230\_ALERT\_2\_B Hirshfeld Test Diff for C13 --C16 . 9.0 s.u.  
PLAT230\_ALERT\_2\_B Hirshfeld Test Diff for C24 --C25 . 12.5 s.u.  
PLAT703\_ALERT\_1\_B Torsion Calc -53.1(2), Rep -52.6(5), Dev.. 2.50 Sigma  
O(2)-S(1)-N(1)-C(21) 1\_555 1\_555 1\_555 1\_555 # 2 Check

**Author Response: The structure is affected by some strain. Crystal imperfections can not be excluded either.**

PLAT703\_ALERT\_1\_B Torsion Calc     -62.7(2), Rep     -63.3(4), Dev..     3.00 Sigma  
O(3)-S(1)-N(1)-N(5)    1\_555    1\_555    1\_555    1\_555     #     5 Check

**Author Response: The structure is affected by some strain. Crystal imperfections can not be excluded either.**

PLAT703\_ALERT\_1\_B Torsion Calc     53.2(2), Rep     52.6(4), Dev..     3.00 Sigma  
C(10)-S(1)-N(1)-N(5)    1\_555    1\_555    1\_555    1\_555     #     11 Check

**Author Response: The structure is affected by some strain. Crystal imperfections can not be excluded either.**

PLAT703\_ALERT\_1\_B Torsion Calc     179.1(3), Rep   -180.00(2), Dev..     3.00 Sigma  
C(8)-C(1)-C(17)-N(4)    1\_555    1\_555    1\_555    1\_555     #     24 Check

**Author Response: The structure is affected by some strain. Crystal imperfections can not be excluded either.**

PLAT703\_ALERT\_1\_B Torsion Calc     179.8(3), Rep   -179.4(6), Dev..     2.67 Sigma  
C(17)-C(1)-C(13)-C(16)   1\_555    1\_555    1\_555    1\_555     #     30 Check

**Author Response: The structure is affected by some strain. Crystal imperfections can not be excluded either.**

PLAT703\_ALERT\_1\_B Torsion Calc   -179.4(3), Rep     179.8(6), Dev..     2.67 Sigma  
C(11)-C(10)-C(17)-N(4)   1\_555    1\_555    1\_555    1\_555     #     38 Check

**Author Response: The structure is affected by some strain. Crystal imperfections can not be excluded either.**

PLAT703\_ALERT\_1\_B Torsion Calc     177.7(3), Rep     176.9(7), Dev..     2.67 Sigma  
C(1)-C(13)-C(14)-C(18)   1\_555    1\_555    1\_555    1\_555     #     51 Check

**Author Response: The structure is affected by some strain. Crystal imperfections can not be excluded either.**

PLAT703\_ALERT\_1\_B Torsion Calc     55.1(4), Rep     56.1(10), Dev..     2.50 Sigma  
C(13)-C(14)-C(18)-C(22)   1\_555    1\_555    1\_555    1\_555     #     55 Check

**Author Response: The structure is affected by some strain. Crystal imperfections can not be excluded either.**

PLAT703\_ALERT\_1\_B Torsion Calc      -1.0(5), Rep      -2.2(11), Dev..      2.40 Sigma  
                          C(19)-C(20)-C(24)-C(25)    1\_555    1\_555    1\_555    1\_555      #    61 Check

**Author Response: The structure is affected by some strain. Crystal imperfections can not be excluded either.**

PLAT703\_ALERT\_1\_B Torsion Calc      1.4(5), Rep      2.5(11), Dev..      2.20 Sigma  
                          C(20)-C(24)-C(25)-C(23)    1\_555    1\_555    1\_555    1\_555      #    63 Check

**Author Response: The structure is affected by some strain. Crystal imperfections can not be excluded either.**

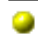

#### Alert level C

DIFMN03\_ALERT\_1\_C The minimum difference density is < -0.1\*ZMAX\*0.75  
                          The relevant atom site should be identified.

DIFMX02\_ALERT\_1\_C The maximum difference density is > 0.1\*ZMAX\*0.75  
                          The relevant atom site should be identified.

PLAT220\_ALERT\_2\_C NonSolvent    Resd 1    C    Ueq(max)/Ueq(min) Range      3.6 Ratio  
 PLAT230\_ALERT\_2\_C Hirshfeld Test Diff for    C1      --C8      .      6.0 s.u.  
 PLAT340\_ALERT\_3\_C Low Bond Precision on    C-C Bonds .....    0.00421 Ang.  
 PLAT703\_ALERT\_1\_C Torsion Calc    169.41(18), Rep      169.1(4), Dev..      1.72 Sigma  
                          O(2)-S(1)-N(1)-N(5)    1\_555    1\_555    1\_555    1\_555      #    1 Check

**Author Response: The structure is affected by some strain. Crystal imperfections can not be excluded either.**

PLAT703\_ALERT\_1\_C Torsion Calc      74.8(2), Rep      75.1(5), Dev..      1.50 Sigma  
                          O(3)-S(1)-N(1)-C(21)    1\_555    1\_555    1\_555    1\_555      #    6 Check

**Author Response: The structure is affected by some strain. Crystal imperfections can not be excluded either.**

PLAT703\_ALERT\_1\_C Torsion Calc      80.6(3), Rep      81.0(6), Dev..      1.33 Sigma  
                          O(3)-S(1)-C(10)-C(11)    1\_555    1\_555    1\_555    1\_555      #    7 Check

**Author Response: The structure is affected by some strain. Crystal imperfections can not be excluded either.**

PLAT703\_ALERT\_1\_C Torsion Calc      -179.0(2), Rep      -179.4(6), Dev..      2.00 Sigma  
                          C(21)-N(1)-N(5)-C(12)    1\_555    1\_555    1\_555    1\_555      #    14 Check

**Author Response: The structure is affected by some strain. Crystal imperfections can not be excluded either.**

PLAT703\_ALERT\_1\_C Torsion Calc      2.0(3), Rep      1.5(7), Dev..      1.67 Sigma  
C(14-N(4)-C(17-C(1)    1\_555    1\_555    1\_555    1\_555      #    15 Check

**Author Response: The structure is affected by some strain. Crystal imperfections can not be excluded either.**

PLAT703\_ALERT\_1\_C Torsion Calc      0.6(4), Rep      1.3(10), Dev..      1.75 Sigma  
N(1)-N(5)-C(12-C(11)    1\_555    1\_555    1\_555    1\_555      #    19 Check

**Author Response: The structure is affected by some strain. Crystal imperfections can not be excluded either.**

PLAT703\_ALERT\_1\_C Torsion Calc    180.0(3), Rep    179.4(7), Dev..      2.00 Sigma  
C(8)-C(1)-C(13-C(14)    1\_555    1\_555    1\_555    1\_555      #    21 Check

**Author Response: The structure is affected by some strain. Crystal imperfections can not be excluded either.**

PLAT703\_ALERT\_1\_C Torsion Calc    178.1(3), Rep    177.5(6), Dev..      2.00 Sigma  
C(13-C(1)-C(17-C(10)    1\_555    1\_555    1\_555    1\_555      #    28 Check

**Author Response: The structure is affected by some strain. Crystal imperfections can not be excluded either.**

PLAT703\_ALERT\_1\_C Torsion Calc      1.3(3), Rep      1.9(8), Dev..      2.00 Sigma  
C(17-C(1)-C(13-C(14)    1\_555    1\_555    1\_555    1\_555      #    29 Check

**Author Response: The structure is affected by some strain. Crystal imperfections can not be excluded either.**

PLAT703\_ALERT\_1\_C Torsion Calc    -1.4(4), Rep    -0.8(10), Dev..      1.50 Sigma  
C(8)-C(9)-C(11-C(10)    1\_555    1\_555    1\_555    1\_555      #    32 Check

**Author Response: The structure is affected by some strain. Crystal imperfections can not be excluded either.**

PLAT703\_ALERT\_1\_C Torsion Calc    175.4(3), Rep    174.9(6), Dev..      1.67 Sigma  
C(8)-C(9)-C(11-C(12)    1\_555    1\_555    1\_555    1\_555      #    33 Check

**Author Response: The structure is affected by some strain. Crystal imperfections can not be excluded either.**

PLAT703\_ALERT\_1\_C Torsion Calc      0.7(4), Rep      0.2(8), Dev..      1.25 Sigma  
C(17-C(10)-C(11-C(9)    1\_555    1\_555    1\_555    1\_555      #    40 Check

**Author Response: The structure is affected by some strain. Crystal imperfections can not be excluded either.**

PLAT703\_ALERT\_1\_C Torsion Calc    -176.2(3), Rep    -175.6(6), Dev..    2.00 Sigma  
C(17-C(10-C(11-C(12    1\_555    1\_555    1\_555    1\_555    #    41 Check

**Author Response: The structure is affected by some strain. Crystal imperfections can not be excluded either.**

PLAT703\_ALERT\_1\_C Torsion Calc    -93.1(3), Rep    -93.5(7), Dev..    1.33 Sigma  
N(5)-C(12-C(15-C(19    1\_555    1\_555    1\_555    1\_555    #    46 Check

**Author Response: The structure is affected by some strain. Crystal imperfections can not be excluded either.**

PLAT703\_ALERT\_1\_C Torsion Calc    90.2(3), Rep    90.7(7), Dev..    1.67 Sigma  
C(11-C(12-C(15-C(19    1\_555    1\_555    1\_555    1\_555    #    48 Check

**Author Response: The structure is affected by some strain. Crystal imperfections can not be excluded either.**

PLAT703\_ALERT\_1\_C Torsion Calc    -0.8(5), Rep    -1.6(13), Dev..    1.60 Sigma  
C(16-C(13-C(14-C(18    1\_555    1\_555    1\_555    1\_555    #    53 Check

**Author Response: The structure is affected by some strain. Crystal imperfections can not be excluded either.**

PLAT703\_ALERT\_1\_C Torsion Calc    179.1(3), Rep    179.5(5), Dev..    1.33 Sigma  
C(12-C(15-C(19-C(20    1\_555    1\_555    1\_555    1\_555    #    56 Check

**Author Response: The structure is affected by some strain. Crystal imperfections can not be excluded either.**

PLAT703\_ALERT\_1\_C Torsion Calc    -178.8(3), Rep    -179.2(6), Dev..    1.33 Sigma  
C(12-C(15-C(23-C(25    1\_555    1\_555    1\_555    1\_555    #    57 Check

**Author Response: The structure is affected by some strain. Crystal imperfections can not be excluded either.**

PLAT703\_ALERT\_1\_C Torsion Calc    1.5(5), Rep    0.5(9), Dev..    2.00 Sigma  
C(19-C(15-C(23-C(25    1\_555    1\_555    1\_555    1\_555    #    58 Check

**Author Response: The structure is affected by some strain. Crystal imperfections can not be excluded either.**

PLAT703\_ALERT\_1\_C Torsion Calc        -1.2(5), Rep        -0.2(7), Dev..        2.00 Sigma  
                          C(23-C(15-C(19-C(20    1\_555    1\_555    1\_555    1\_555        #    59 Check

**Author Response: The structure is affected by some strain. Crystal imperfections can not be excluded either.**

---

● **Alert level G**

PLAT005\_ALERT\_5\_G No Embedded Refinement Details Found in the CIF        Please Do !  
 PLAT007\_ALERT\_5\_G Number of Unrefined Donor-H Atoms .....        1 Report  
                          H1  
 PLAT063\_ALERT\_4\_G Crystal Size Possibly too Large for Beam Size ..        0.92 mm  
 PLAT199\_ALERT\_1\_G Reported \_cell\_measurement\_temperature ..... (K)        293 Check  
 PLAT200\_ALERT\_1\_G Reported \_diffrn\_ambient\_temperature ..... (K)        293 Check  
 PLAT808\_ALERT\_5\_G No Parseable SHELXL Style Weighting Scheme Found        Please Check  
 PLAT882\_ALERT\_1\_G No Datum for \_diffrn\_reflms\_av\_unetI/netI .....        Please Do !  
 PLAT883\_ALERT\_1\_G Absent Datum for \_atom\_sites\_solution\_primary ..        Please Do !

---

19 **ALERT level A** = Most likely a serious problem - resolve or explain  
 15 **ALERT level B** = A potentially serious problem, consider carefully  
 25 **ALERT level C** = Check. Ensure it is not caused by an omission or oversight  
   8 **ALERT level G** = General information/check it is not something unexpected

53 ALERT type 1 CIF construction/syntax error, inconsistent or missing data  
   9 ALERT type 2 Indicator that the structure model may be wrong or deficient  
   1 ALERT type 3 Indicator that the structure quality may be low  
   1 ALERT type 4 Improvement, methodology, query or suggestion  
   3 ALERT type 5 Informative message, check

---

It is advisable to attempt to resolve as many as possible of the alerts in all categories. Often the minor alerts point to easily fixed oversights, errors and omissions in your CIF or refinement strategy, so attention to these fine details can be worthwhile. In order to resolve some of the more serious problems it may be necessary to carry out additional measurements or structure refinements. However, the purpose of your study may justify the reported deviations and the more serious of these should normally be commented upon in the discussion or experimental section of a paper or in the "special\_details" fields of the CIF. checkCIF was carefully designed to identify outliers and unusual parameters, but every test has its limitations and alerts that are not important in a particular case may appear. Conversely, the absence of alerts does not guarantee there are no aspects of the results needing attention. It is up to the individual to critically assess their own results and, if necessary, seek expert advice.

### Publication of your CIF in IUCr journals

A basic structural check has been run on your CIF. These basic checks will be run on all CIFs submitted for publication in IUCr journals (*Acta Crystallographica*, *Journal of Applied Crystallography*, *Journal of Synchrotron Radiation*); however, if you intend to submit to *Acta Crystallographica Section C* or *E* or *IUCrData*, you should make sure that full publication checks are run on the final version of your CIF prior to submission.

### Publication of your CIF in other journals

Please refer to the *Notes for Authors* of the relevant journal for any special instructions relating to CIF submission.

### Validation response form

Please find below a validation response form (VRF) that can be filled in and pasted into your CIF.

```
# start Validation Reply Form
_vrf_REFLT02__143497_1
;
PROBLEM: The number of reflections greater than the sigma threshold
RESPONSE: ...
;
_vrf_DIFMN03__143497_1
;
PROBLEM: The minimum difference density is < -0.1*ZMAX*0.75
RESPONSE: ...
;
_vrf_DIFMX02__143497_1
;
PROBLEM: The maximum difference density is > 0.1*ZMAX*0.75
RESPONSE: ...
;
_vrf_PLAT213__143497_1
;
PROBLEM: Atom C10                has ADP max/min Ratio .....      4.9 oblate
RESPONSE: ...
;
_vrf_PLAT230__143497_1
```

```

;
PROBLEM: Hirshfeld Test Diff for      S1      --C10      .      8.0 s.u.
RESPONSE: ...
;
_vrf_PLAT220__143497_1
;
PROBLEM: NonSolvent   Resd 1   C   Ueq(max)/Ueq(min) Range      3.6 Ratio
RESPONSE: ...
;
_vrf_PLAT340__143497_1
;
PROBLEM: Low Bond Precision on   C-C Bonds .....      0.00421 Ang.
RESPONSE: ...
;
# end Validation Reply Form

```

**PLATON version of 02/02/2025; check.def file version of 02/02/2025**

Datablock \_143497\_1 - ellipsoid plot

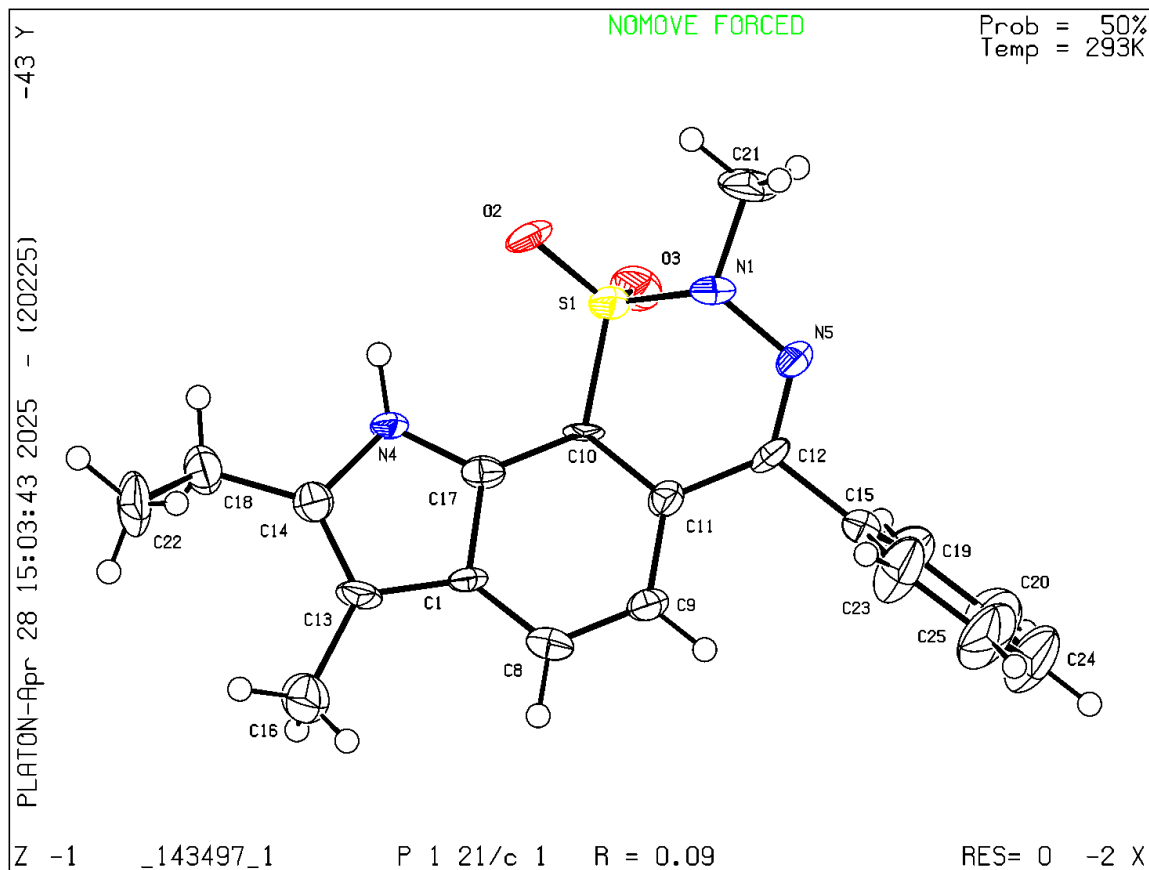

Supplement: Additional file 2 [file 3g_checkcif.pdf › Átnevezett XRD/3g_checkcif.pdf]
