# Supplementary material for: Thiadiazino-indole, thiadiazino-carbazole and benzothiadiazino-carbazole dioxides: synthesis, physicochemical and early ADME characterization of representatives of new tri-, tetra- and pentacyclic ring systems and their intermediates
Source: publisher site journal article supplement (doi:10.3762/bjoc.21.169), 2025-10-21

## checkCIF/PLATON report

You have not supplied any structure factors. As a result the full set of tests cannot be run.

THIS REPORT IS FOR GUIDANCE ONLY. IF USED AS PART OF A REVIEW PROCEDURE FOR PUBLICATION, IT SHOULD NOT REPLACE THE EXPERTISE OF AN EXPERIENCED CRYSTALLOGRAPHIC REFEREE.

No syntax errors found. CIF dictionary Interpreting this report

**Datablock: 142611 1**

|                 |                |                    |               |
|-----------------|----------------|--------------------|---------------|
| Bond precision: | C-C = 0.0023 A | Wavelength=1.54187 |               |
| Cell:           | a=7.6009 (5)   | b=17.131 (1)       | c=10.9012 (8) |
|                 | alpha=90       | beta=95.705 (4)    | gamma=90      |
| Temperature:    | 293 K          |                    |               |

|                        | Calculated      | Reported        |
|------------------------|-----------------|-----------------|
| Volume                 | 1412.43(16)     | 1412.43(16)     |
| Space group            | P 21/a          | P 1 21/a 1      |
| Hall group             | -P 2yab         | -P 2yab         |
| Moiety formula         | C14 H17 N3 O2 S | C14 H17 N3 O2 S |
| Sum formula            | C14 H17 N3 O2 S | C14 H17 N3 O2 S |
| Mr                     | 291.37          | 291.37          |
| Dx, g cm <sup>-3</sup> | 1.370           | 1.370           |
| Z                      | 4               | 4               |
| Mu (mm <sup>-1</sup> ) | 2.086           | 2.086           |
| F000                   | 616.0           | 616.0           |
| F000'                  | 619.00          |                 |
| h, k, lmax             | 9, 21, 13       | 9, 21, 12       |
| Nref                   | 2745            | 2587            |
| Tmin, Tmax             | 0.669, 0.882    | 0.605, 0.882    |
| Tmin'                  | 0.251           |                 |

```
Correction method= # Reported T Limits: Tmin=0.605 Tmax=0.882
AbsCorr = MULTI-SCAN
```

Data completeness= 0.942                      Theta (max)= 71.390

|                               |                                 |
|-------------------------------|---------------------------------|
| R(reflections)= 0.0510( 9521) | wR2(reflections)= 0.0706( 9573) |
| S = 1.119                     | Npar= 204                       |

---

The following ALERTS were generated. Each ALERT has the format

**test-name\_ALERT\_alert-type\_alert-level.**

Click on the hyperlinks for more details of the test.

---

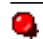

#### **Alert level A**

DIFMN02\_ALERT\_2\_A The minimum difference density is  $< -0.1 \times Z_{\text{MAX}} \times 2.00$   
\_refine\_diff\_density\_min given = -4.410  
Test value = -3.200

**Author Response: Although the residual density is out of border but there is no doubt about the chemical structure taking into account other evidences, e.g. NMR. The error maybe due to crystal imperfections.**

PLAT097\_ALERT\_2\_A Large Reported Max. (Positive) Residual Density 5.84 eA-3

**Author Response: Although the residual density is out of border but there is no doubt about the chemical structure taking into account other evidences, e.g. NMR. The error maybe due to crystal imperfections.**

PLAT098\_ALERT\_2\_A Large Reported Min. (Negative) Residual Density -4.41 eA-3

**Author Response: Although the residual density is out of border but there is no doubt about the chemical structure taking into account other evidences, e.g. NMR. The error maybe due to crystal imperfections.**

PLAT703\_ALERT\_1\_A Torsion Calc 176.52(12), Rep 176.9(2), Dev.. 3.17 Sigma  
N(6)-N(5)-C(16)-C(17 1\_555 1\_555 1\_555 1\_555 # 18 Check

**Author Response: The structre is affected by some strain. Crystal imperfections can not be excluded either.**

PLAT703\_ALERT\_1\_A Torsion Calc -174.83(13), Rep -174.3(2), Dev.. 4.08 Sigma  
C(16)-N(5)-N(6)-C(19 1\_555 1\_555 1\_555 1\_555 # 20 Check

**Author Response: The structre is affected by some strain. Crystal imperfections can not be excluded either.**

PLAT703\_ALERT\_1\_A Torsion Calc -176.32(12), Rep -176.8(2), Dev.. 4.00 Sigma  
C(10)-C(7)-C(15)-S(1) 1\_555 1\_555 1\_555 1\_555 # 25 Check

**Author Response: The structre is affected by some strain. Crystal imperfections can not be excluded either.**

PLAT703\_ALERT\_1\_A Torsion Calc 165.75(14), Rep 164.9(2), Dev.. 6.07 Sigma  
C(15-C(11-C(16-C(17 1\_555 1\_555 1\_555 1\_555 # 43 Check

**Author Response: The structre is affected by some strain. Crystal imperfections can not be excluded either.**

PLAT703\_ALERT\_1\_A Torsion Calc 69.09(19), Rep 69.9(3), Dev.. 4.26 Sigma  
C(20-C(14-C(18-N(4) 1\_555 1\_555 1\_555 1\_555 # 50 Check

**Author Response: The structre is affected by some strain. Crystal imperfections can not be excluded either.**

PLAT703\_ALERT\_1\_A Torsion Calc -108.8(2), Rep -107.6(3), Dev.. 6.00 Sigma  
C(20-C(14-C(18-C(12 1\_555 1\_555 1\_555 1\_555 # 51 Check

**Author Response: The structre is affected by some strain. Crystal imperfections can not be excluded either.**

---

#### Alert level B

REFLT02\_ALERT\_1\_B The number of reflections greater than the sigma threshold  
cannot exceed the number of symmetry-independent reflections  
Number of symmetry-independent reflections = 2587  
Number of reflections greater than sigma threshold = 9521  
PLAT029\_ALERT\_3\_B \_diffrn\_measured\_fraction\_theta\_full value Low . 0.942 Why?  
PLAT230\_ALERT\_2\_B Hirshfeld Test Diff for S1 --O2 . 9.1 s.u.  
PLAT230\_ALERT\_2\_B Hirshfeld Test Diff for S1 --O3 . 9.9 s.u.  
PLAT230\_ALERT\_2\_B Hirshfeld Test Diff for S1 --N6 . 7.3 s.u.  
PLAT230\_ALERT\_2\_B Hirshfeld Test Diff for C7 --C15 . 9.2 s.u.  
PLAT230\_ALERT\_2\_B Hirshfeld Test Diff for C12 --C13 . 9.5 s.u.  
PLAT703\_ALERT\_1\_B Torsion Calc 150.26(12), Rep 149.9(2), Dev.. 3.00 Sigma  
O(3)-S(1)-C(15-C(11 1\_555 1\_555 1\_555 1\_555 # 8 Check

**Author Response: The structre is affected by some strain. Crystal imperfections can not be excluded either.**

PLAT703\_ALERT\_1\_B Torsion Calc 0.58(18), Rep 0.2(2), Dev.. 2.11 Sigma  
C(7)-N(4)-C(18-C(12 1\_555 1\_555 1\_555 1\_555 # 13 Check

**Author Response: The structre is affected by some strain. Crystal imperfections can not be excluded either.**

PLAT703\_ALERT\_1\_B Torsion Calc -0.57(17), Rep -0.1(2), Dev.. 2.76 Sigma  
C(18-N(4)-C(7)-C(10 1\_555 1\_555 1\_555 1\_555 # 15 Check

**Author Response: The structure is affected by some strain. Crystal imperfections can not be excluded either.**

PLAT703\_ALERT\_1\_B Torsion Calc -179.61(16), Rep -179.2(2), Dev.. 2.56 Sigma  
N(4)-C(7)-C(15-C(11 1\_555 1\_555 1\_555 1\_555 # 24 Check

**Author Response: The structure is affected by some strain. Crystal imperfections can not be excluded either.**

PLAT703\_ALERT\_1\_B Torsion Calc -0.4(2), Rep 0.1(3), Dev.. 2.50 Sigma  
C(15-C(7)-C(10-C(9) 1\_555 1\_555 1\_555 1\_555 # 27 Check

**Author Response: The structure is affected by some strain. Crystal imperfections can not be excluded either.**

PLAT703\_ALERT\_1\_B Torsion Calc 179.66(15), Rep -180.0(2), Dev.. 2.27 Sigma  
C(15-C(7)-C(10-C(12 1\_555 1\_555 1\_555 1\_555 # 28 Check

**Author Response: The structure is affected by some strain. Crystal imperfections can not be excluded either.**

PLAT703\_ALERT\_1\_B Torsion Calc -17.8(2), Rep -18.4(4), Dev.. 3.00 Sigma  
C(8)-C(11-C(16-C(17 1\_555 1\_555 1\_555 1\_555 # 41 Check

**Author Response: The structure is affected by some strain. Crystal imperfections can not be excluded either.**

PLAT703\_ALERT\_1\_B Torsion Calc -16.8(2), Rep -17.3(4), Dev.. 2.50 Sigma  
C(15-C(11-C(16-N(5) 1\_555 1\_555 1\_555 1\_555 # 42 Check

**Author Response: The structure is affected by some strain. Crystal imperfections can not be excluded either.**

---

**Alert level C**

DIFMN03\_ALERT\_1\_C The minimum difference density is < -0.1\*ZMAX\*0.75  
The relevant atom site should be identified.

DIFMX02\_ALERT\_1\_C The maximum difference density is > 0.1\*ZMAX\*0.75  
The relevant atom site should be identified.

PLAT166\_ALERT\_4\_C S.U's Given on Coordinates for Calc-flagged .... H1 Note  
PLAT166\_ALERT\_4\_C S.U's Given on Coordinates for Calc-flagged .... H2 Note  
PLAT220\_ALERT\_2\_C NonSolvent Resd 1 C Ueq(max)/Ueq(min) Range 3.1 Ratio  
PLAT230\_ALERT\_2\_C Hirshfeld Test Diff for N5 --N6 . 6.1 s.u.  
PLAT230\_ALERT\_2\_C Hirshfeld Test Diff for C11 --C16 . 5.5 s.u.  
PLAT703\_ALERT\_1\_C Torsion Calc 98.60(14), Rep 98.4(2), Dev.. 1.43 Sigma  
O(2)-S(1)-C(15-C(7) 1\_555 1\_555 1\_555 1\_555 # 3 Check

**Author Response: The structure is affected by some strain. Crystal imperfections can not be excluded either.**

PLAT703\_ALERT\_1\_C Torsion Calc -79.05(13), Rep -79.3(2), Dev.. 1.92 Sigma  
O(2)-S(1)-C(15-C(11 1\_555 1\_555 1\_555 1\_555 # 4 Check

**Author Response: The structure is affected by some strain. Crystal imperfections can not be excluded either.**

PLAT703\_ALERT\_1\_C Torsion Calc -32.08(16), Rep -32.4(2), Dev.. 2.00 Sigma  
O(3)-S(1)-C(15-C(7) 1\_555 1\_555 1\_555 1\_555 # 7 Check

**Author Response: The structure is affected by some strain. Crystal imperfections can not be excluded either.**

PLAT703\_ALERT\_1\_C Torsion Calc -145.05(14), Rep -144.8(2), Dev.. 1.79 Sigma  
N(6)-S(1)-C(15-C(7) 1\_555 1\_555 1\_555 1\_555 # 9 Check

**Author Response: The structure is affected by some strain. Crystal imperfections can not be excluded either.**

PLAT703\_ALERT\_1\_C Torsion Calc 37.30(14), Rep 37.5(2), Dev.. 1.43 Sigma  
N(6)-S(1)-C(15-C(11 1\_555 1\_555 1\_555 1\_555 # 10 Check

**Author Response: The structure is affected by some strain. Crystal imperfections can not be excluded either.**

PLAT703\_ALERT\_1\_C Torsion Calc -56.42(12), Rep -56.6(2), Dev.. 1.50 Sigma  
C(15-S(1)-N(6)-N(5) 1\_555 1\_555 1\_555 1\_555 # 11 Check

**Author Response: The structure is affected by some strain. Crystal imperfections can not be excluded either.**

PLAT703\_ALERT\_1\_C Torsion Calc 163.17(12), Rep 163.0(2), Dev.. 1.42 Sigma  
C(15-S(1)-N(6)-C(19 1\_555 1\_555 1\_555 1\_555 # 12 Check

**Author Response: The structure is affected by some strain. Crystal imperfections can not be excluded either.**

PLAT703\_ALERT\_1\_C Torsion Calc -179.78(17), Rep 179.9(2), Dev.. 1.88 Sigma  
C(18-N(4)-C(7)-C(15 1\_555 1\_555 1\_555 1\_555 # 16 Check

**Author Response: The structure is affected by some strain. Crystal imperfections can not be excluded either.**

PLAT703\_ALERT\_1\_C Torsion Calc 43.16(17), Rep 43.5(3), Dev.. 2.00 Sigma  
C(16-N(5)-N(6)-S(1) 1\_555 1\_555 1\_555 1\_555 # 19 Check

**Author Response: The structre is affected by some strain. Crystal imperfections can not be excluded either.**

PLAT703\_ALERT\_1\_C Torsion Calc -179.73(14), Rep -179.9(2), Dev.. 1.21 Sigma  
N(4)-C(7)-C(10-C(9) 1\_555 1\_555 1\_555 1\_555 # 21 Check

**Author Response: The structre is affected by some strain. Crystal imperfections can not be excluded either.**

PLAT703\_ALERT\_1\_C Torsion Calc 0.35(17), Rep 0.1(2), Dev.. 1.47 Sigma  
N(4)-C(7)-C(10-C(12 1\_555 1\_555 1\_555 1\_555 # 22 Check

**Author Response: The structre is affected by some strain. Crystal imperfections can not be excluded either.**

PLAT703\_ALERT\_1\_C Torsion Calc 1.3(2), Rep 0.9(4), Dev.. 2.00 Sigma  
C(10-C(7)-C(15-C(11 1\_555 1\_555 1\_555 1\_555 # 26 Check

**Author Response: The structre is affected by some strain. Crystal imperfections can not be excluded either.**

PLAT703\_ALERT\_1\_C Torsion Calc -0.1(2), Rep -0.4(4), Dev.. 1.50 Sigma  
C(8)-C(9)-C(10-C(7) 1\_555 1\_555 1\_555 1\_555 # 32 Check

**Author Response: The structre is affected by some strain. Crystal imperfections can not be excluded either.**

PLAT703\_ALERT\_1\_C Torsion Calc -179.27(15), Rep -179.0(2), Dev.. 1.80 Sigma  
C(7)-C(10-C(12-C(13 1\_555 1\_555 1\_555 1\_555 # 34 Check

**Author Response: The structre is affected by some strain. Crystal imperfections can not be excluded either.**

PLAT703\_ALERT\_1\_C Torsion Calc 176.17(12), Rep 176.3(2), Dev.. 1.08 Sigma  
C(8)-C(11-C(15-S(1) 1\_555 1\_555 1\_555 1\_555 # 38 Check

**Author Response: The structre is affected by some strain. Crystal imperfections can not be excluded either.**

PLAT703\_ALERT\_1\_C Torsion Calc 159.71(16), Rep 159.4(2), Dev.. 1.94 Sigma  
C(8)-C(11-C(16-N(5) 1\_555 1\_555 1\_555 1\_555 # 40 Check

**Author Response: The structre is affected by some strain. Crystal imperfections can not be excluded either.**

```
PLAT703_ALERT_1_C Torsion Calc      -7.2(2), Rep      -6.9(3), Dev..      1.50 Sigma
C(16-C(11-C(15-S(1)  1_555  1_555  1_555  1_555      #      44 Check
```

**Author Response: The structre is affected by some strain. Crystal imperfections can not be excluded either.**

```
PLAT703_ALERT_1_C Torsion Calc  175.07(15), Rep      175.3(2), Dev..      1.53 Sigma
C(16-C(11-C(15-C(7)  1_555  1_555  1_555  1_555      #      45 Check
```

**Author Response: The structre is affected by some strain. Crystal imperfections can not be excluded either.**

```
PLAT703_ALERT_1_C Torsion Calc   -0.35(18), Rep      -0.1(2), Dev..      1.39 Sigma
C(10-C(12-C(18-N(4)  1_555  1_555  1_555  1_555      #      46 Check
```

**Author Response: The structre is affected by some strain. Crystal imperfections can not be excluded either.**

```
PLAT703_ALERT_1_C Torsion Calc  177.72(16), Rep      177.5(2), Dev..      1.38 Sigma
C(10-C(12-C(18-C(14  1_555  1_555  1_555  1_555      #      47 Check
```

**Author Response: The structre is affected by some strain. Crystal imperfections can not be excluded either.**

```
PLAT703_ALERT_1_C Torsion Calc   -3.0(3), Rep      -3.4(5), Dev..      1.33 Sigma
C(13-C(12-C(18-C(14  1_555  1_555  1_555  1_555      #      49 Check
```

**Author Response: The structre is affected by some strain. Crystal imperfections can not be excluded either.**

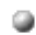

#### Alert level G

|                                                                    |              |
|--------------------------------------------------------------------|--------------|
| PLAT005_ALERT_5_G No Embedded Refinement Details Found in the CIF  | Please Do !  |
| PLAT007_ALERT_5_G Number of Unrefined Donor-H Atoms .....          | 1 Report     |
| H3                                                                 |              |
| PLAT063_ALERT_4_G Crystal Size Possibly too Large for Beam Size .. | 0.64 mm      |
| PLAT128_ALERT_4_G Alternate Setting for Input Space Group P21/a    | P21/c Note   |
| PLAT199_ALERT_1_G Reported _cell_measurement_temperature ..... (K) | 293 Check    |
| PLAT200_ALERT_1_G Reported _diffrn_ambient_temperature ..... (K)   | 293 Check    |
| PLAT808_ALERT_5_G No Parseable SHELXL Style Weighting Scheme Found | Please Check |
| PLAT882_ALERT_1_G No Datum for _diffrn_reflns_av_unetI/netI .....  | Please Do !  |
| PLAT883_ALERT_1_G Absent Datum for _atom_sites_solution_primary .. | Please Do !  |

---

9 **ALERT level A** = Most likely a serious problem - resolve or explain  
 15 **ALERT level B** = A potentially serious problem, consider carefully  
 28 **ALERT level C** = Check. Ensure it is not caused by an omission or oversight  
 9 **ALERT level G** = General information/check it is not something unexpected

42 ALERT type 1 CIF construction/syntax error, inconsistent or missing data  
 11 ALERT type 2 Indicator that the structure model may be wrong or deficient  
 1 ALERT type 3 Indicator that the structure quality may be low  
 4 ALERT type 4 Improvement, methodology, query or suggestion  
 3 ALERT type 5 Informative message, check

---

It is advisable to attempt to resolve as many as possible of the alerts in all categories. Often the minor alerts point to easily fixed oversights, errors and omissions in your CIF or refinement strategy, so attention to these fine details can be worthwhile. In order to resolve some of the more serious problems it may be necessary to carry out additional measurements or structure refinements. However, the purpose of your study may justify the reported deviations and the more serious of these should normally be commented upon in the discussion or experimental section of a paper or in the "special\_details" fields of the CIF. checkCIF was carefully designed to identify outliers and unusual parameters, but every test has its limitations and alerts that are not important in a particular case may appear. Conversely, the absence of alerts does not guarantee there are no aspects of the results needing attention. It is up to the individual to critically assess their own results and, if necessary, seek expert advice.

### Publication of your CIF in IUCr journals

A basic structural check has been run on your CIF. These basic checks will be run on all CIFs submitted for publication in IUCr journals (*Acta Crystallographica*, *Journal of Applied Crystallography*, *Journal of Synchrotron Radiation*); however, if you intend to submit to *Acta Crystallographica Section C* or *E* or *IUCrData*, you should make sure that full publication checks are run on the final version of your CIF prior to submission.

### Publication of your CIF in other journals

Please refer to the *Notes for Authors* of the relevant journal for any special instructions relating to CIF submission.

### Validation response form

Please find below a validation response form (VRF) that can be filled in and pasted into your CIF.

```
# start Validation Reply Form
_vrf_REFLT02__142611_1
;
PROBLEM: The number of reflections greater than the sigma threshold
RESPONSE: ...
;
_vrf_DIFMN03__142611_1
;
PROBLEM: The minimum difference density is < -0.1*ZMAX*0.75
RESPONSE: ...
```



```

;
_vrf_DIFMX02__142611_1
;
PROBLEM: The maximum difference density is > 0.1*ZMAX*0.75
RESPONSE: ...
;
_vrf_PLAT029__142611_1
;
PROBLEM: _diffn_measured_fraction_theta_full value Low .      0.942 Why?
RESPONSE: ...
;
_vrf_PLAT230__142611_1
;
PROBLEM: Hirshfeld Test Diff for      S1      --O2      .      9.1 s.u.
RESPONSE: ...
;
_vrf_PLAT166__142611_1
;
PROBLEM: S.U's Given on Coordinates for Calc-flagged ....      H1 Note
RESPONSE: ...
;
_vrf_PLAT220__142611_1
;
PROBLEM: NonSolvent      Resd 1  C      Ueq(max)/Ueq(min) Range      3.1 Ratio
RESPONSE: ...
;
# end Validation Reply Form

```

---

**PLATON version of 02/02/2025; check.def file version of 02/02/2025**

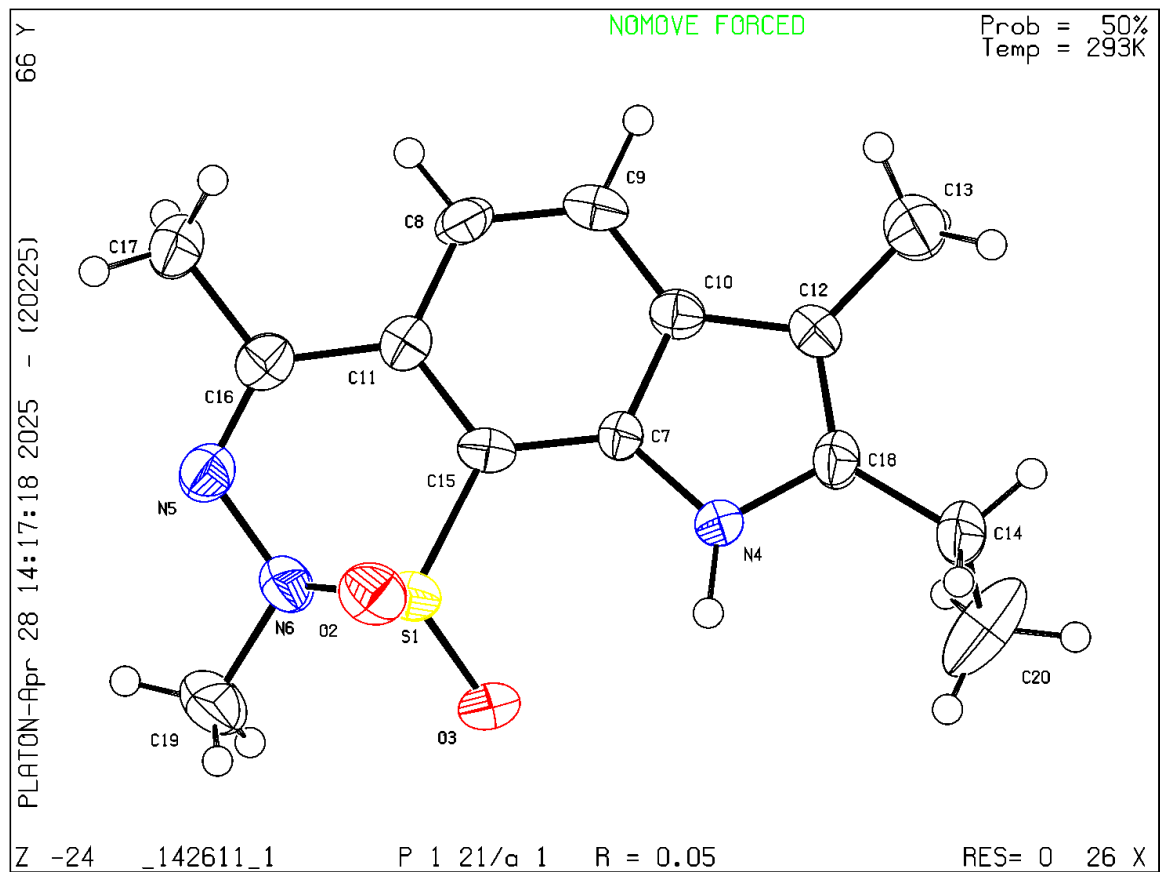

Supplement: Additional file 2 [file 3b_checkcif.pdf › Átnevezett XRD/3b_checkcif.pdf]
