# Supplementary material for: Thiadiazino-indole, thiadiazino-carbazole and benzothiadiazino-carbazole dioxides: synthesis, physicochemical and early ADME characterization of representatives of new tri-, tetra- and pentacyclic ring systems and their intermediates
Source: publisher site journal article supplement (doi:10.3762/bjoc.21.169), 2025-10-21

## checkCIF/PLATON report

You have not supplied any structure factors. As a result the full set of tests cannot be run.

THIS REPORT IS FOR GUIDANCE ONLY. IF USED AS PART OF A REVIEW PROCEDURE FOR PUBLICATION, IT SHOULD NOT REPLACE THE EXPERTISE OF AN EXPERIENCED CRYSTALLOGRAPHIC REFEREE.

No syntax errors found.      CIF dictionary      Interpreting this report

### Datablock: \_143519\_2

---

Bond precision:      C-C = 0.0088 Å

Wavelength=1.54187

Cell:                      a=6.3364(8)                      b=9.2356(13)                      c=15.0269(18)  
                             alpha=94.676(9)                      beta=95.441(7)                      gamma=93.115(8)  
Temperature:              293 K

|                        | Calculated      | Reported        |
|------------------------|-----------------|-----------------|
| Volume                 | 870.8(2)        | 870.80(19)      |
| Space group            | P 1             | P 1             |
| Hall group             | P 1             | P 1             |
| Moiety formula         | C19 H20 N4 O2 S | C19 H20 N4 O2 S |
| Sum formula            | C19 H20 N4 O2 S | C19 H20 N4 O2 S |
| Mr                     | 368.45          | 368.45          |
| Dx, g cm <sup>-3</sup> | 1.405           | 1.405           |
| Z                      | 2               | 2               |
| Mu (mm <sup>-1</sup> ) | 1.835           | 1.836           |
| F000                   | 388.0           | 388.0           |
| F000'                  | 389.73          |                 |
| h,k,lmax               | 7,11,18         | 7,11,18         |
| Nref                   | 6830[ 3415]     | 5016            |
| Tmin,Tmax              | 0.573,0.879     | 0.653,0.879     |
| Tmin'                  | 0.520           |                 |

Correction method= # Reported T Limits: Tmin=0.653 Tmax=0.879  
AbsCorr = MULTI-SCAN

Data completeness= 1.47/0.73

Theta(max)= 71.650

R(reflections)= 0.0406( 7920)

wR2(reflections)=  
0.0647( 7963)

S = 0.940

Npar= 509

---

The following ALERTS were generated. Each ALERT has the format

**test-name\_ALERT\_alert-type\_alert-level.**

Click on the hyperlinks for more details of the test.

---

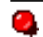

#### **Alert level A**

DIFMN02\_ALERT\_2\_A The minimum difference density is  $< -0.1 \times Z_{MAX} \times 2.00$   
\_refine\_diff\_density\_min given = -13.300  
Test value = -3.200

**Author Response:** Although the residual density is out of border but there is no doubt about the chemical structure taking into account other evidences, e.g. NMR. The error maybe due to crystal imperfections.

SHFSU01\_ALERT\_2\_A The absolute value of parameter shift to su ratio  $> 0.20$   
Absolute value of the parameter shift to su ratio given 3.363  
Additional refinement cycles may be required.

**Author Response:** There was some convergence problem at the refinement, however there is no doubt about the chemical structure taking into account other evidences, e.g. NMR. The error maybe due to crystal imperfections.

PLAT029\_ALERT\_3\_A \_diffraction\_measured\_fraction\_theta\_full value Low . 0.892 Why?

**Author Response:** Although some large-theta reflexions are too weak but there is no doubt about the chemical structure taking into account other evidences, e.g. NMR. The error maybe due to crystal imperfections.

PLAT080\_ALERT\_2\_A Maximum Shift/Error ..... 3.36 Why ?

**Author Response:** There was some convergence problem at the refinement, however there is no doubt about the chemical structure taking into account other evidences, e.g. NMR. The error maybe due to crystal imperfections.

PLAT097\_ALERT\_2\_A Large Reported Max. (Positive) Residual Density 3.27 eA-3

**Author Response:** Although the residual density is out of border but there is no doubt about the chemical structure taking into account other evidences, e.g. NMR. The error maybe due to crystal imperfections.

PLAT098\_ALERT\_2\_A Large Reported Min. (Negative) Residual Density -13.30 eA-3

**Author Response:** Although the residual density is out of border but there is no doubt about the chemical structure taking into account other evidences, e.g. NMR. The error maybe due to crystal imperfections.

PLAT703\_ALERT\_1\_A Torsion Calc -178.7(6), Rep -176.8(9), Dev.. 3.17 Sigma  
N(13-C(1)-C(25-C(42 1\_555 1\_555 1\_555 1\_555 # 44 Check

**Author Response: The structure is affected by some strain. Crystal imperfections can not be excluded either.**

PLAT703\_ALERT\_1\_A Torsion Calc -0.2(9), Rep 2.6(14), Dev.. 3.11 Sigma  
C(37-C(1)-C(25-C(42 1\_555 1\_555 1\_555 1\_555 # 48 Check

**Author Response: The structure is affected by some strain. Crystal imperfections can not be excluded either.**

PLAT703\_ALERT\_1\_A Torsion Calc -176.9(6), Rep -174.9(9), Dev.. 3.33 Sigma  
C(41-C(3)-C(27-C(49 1\_555 1\_555 1\_555 1\_555 # 59 Check

**Author Response: The structure is affected by some strain. Crystal imperfections can not be excluded either.**

PLAT703\_ALERT\_1\_A Torsion Calc -6.4(10), Rep -9.8(15), Dev.. 3.40 Sigma  
C(34-C(24-C(31-C(27 1\_555 1\_555 1\_555 1\_555 # 83 Check

**Author Response: The structure is affected by some strain. Crystal imperfections can not be excluded either.**

PLAT703\_ALERT\_1\_A Torsion Calc -6.4(9), Rep -9.9(14), Dev.. 3.89 Sigma  
C(1)-C(25-C(42-C(46 1\_555 1\_555 1\_555 1\_555 # 87 Check

**Author Response: The structure is affected by some strain. Crystal imperfections can not be excluded either.**

PLAT703\_ALERT\_1\_A Torsion Calc 1.1(10), Rep 5.8(15), Dev.. 4.70 Sigma  
C(40-C(25-C(42-C(45 1\_555 1\_555 1\_555 1\_555 # 88 Check

**Author Response: The structure is affected by some strain. Crystal imperfections can not be excluded either.**

PLAT703\_ALERT\_1\_A Torsion Calc 3.5(10), Rep 0.2(11), Dev.. 3.30 Sigma  
C(42-C(25-C(40-C(30 1\_555 1\_555 1\_555 1\_555 # 90 Check

**Author Response: The structure is affected by some strain. Crystal imperfections can not be excluded either.**

PLAT703\_ALERT\_1\_A Torsion Calc 4.5(9), Rep 8.0(14), Dev.. 3.89 Sigma  
C(3)-C(27-C(31-C(24 1\_555 1\_555 1\_555 1\_555 # 91 Check

**Author Response: The structure is affected by some strain. Crystal imperfections can not be excluded either.**

PLAT703\_ALERT\_1\_A Torsion Calc 148.7(6), Rep 145.3(10), Dev.. 5.67 Sigma  
C(24-C(31-C(43-C(39 1\_555 1\_555 1\_555 1\_555 # 104 Check

**Author Response: The structure is affected by some strain. Crystal imperfections can not be excluded either.**

PLAT703\_ALERT\_1\_A Torsion Calc 54.8(7), Rep 57.0(11), Dev.. 3.14 Sigma  
C(35-C(39-C(43-C(31 1\_555 1\_555 1\_555 1\_555 # 113 Check

**Author Response: The structure is affected by some strain. Crystal imperfections can not be excluded either.**

PLAT703\_ALERT\_1\_A Torsion Calc -4.6(10), Rep -7.8(14), Dev.. 3.20 Sigma  
C(25-C(42-C(45-C(29 1\_555 1\_555 1\_555 1\_555 # 114 Check

**Author Response: The structure is affected by some strain. Crystal imperfections can not be excluded either.**

PLAT703\_ALERT\_1\_A Torsion Calc -150.1(6), Rep -152.1(8), Dev.. 3.33 Sigma  
C(45-C(42-C(46-C(48 1\_555 1\_555 1\_555 1\_555 # 116 Check

**Author Response: The structure is affected by some strain. Crystal imperfections can not be excluded either.**

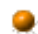

#### **Alert level B**

REFLT02\_ALERT\_1\_B The number of reflections greater than the sigma threshold  
cannot exceed the number of symmetry-independent reflections  
Number of symmetry-independent reflections = 5016  
Number of reflections greater than sigma threshold = 7920  
PLAT111\_ALERT\_2\_B ADDSYM Detects New (Pseudo) Centre of Symmetry . 100 %Fit  
PLAT113\_ALERT\_2\_B ADDSYM Suggests Possible Pseudo/New Space Group P-1 Check  
Check Model Parameter Symmetry for Reflection Data Support  
PLAT230\_ALERT\_2\_B Hirshfeld Test Diff for S1 --O3 . 10.0 s.u.  
PLAT230\_ALERT\_2\_B Hirshfeld Test Diff for N4 --N8 . 11.5 s.u.  
PLAT230\_ALERT\_2\_B Hirshfeld Test Diff for C28 --C50 . 10.4 s.u.  
PLAT230\_ALERT\_2\_B Hirshfeld Test Diff for S2 --O5 . 11.0 s.u.  
PLAT230\_ALERT\_2\_B Hirshfeld Test Diff for N1 --N2 . 13.5 s.u.  
PLAT230\_ALERT\_2\_B Hirshfeld Test Diff for C16 --C20 . 11.5 s.u.  
PLAT230\_ALERT\_2\_B Hirshfeld Test Diff for C29 --C45 . 7.7 s.u.  
PLAT703\_ALERT\_1\_B Torsion Calc -175.0(5), Rep -176.1(7), Dev.. 2.20 Sigma  
C(19-N(4)-N(8)-C(21 1\_555 1\_555 1\_555 1\_555 # 35 Check

**Author Response: The structure is affected by some strain. Crystal imperfections can not be excluded either.**

PLAT703\_ALERT\_1\_B Torsion Calc 178.6(5), Rep 179.9(6), Dev.. 2.60 Sigma  
N(5)-N(10)-C(49)-C(27 1\_555 1\_555 1\_555 1\_555 # 39 Check

**Author Response: The structure is affected by some strain. Crystal imperfections can not be excluded either.**

PLAT703\_ALERT\_1\_B Torsion Calc -178.6(5), Rep -177.2(8), Dev.. 2.80 Sigma  
N(3)-N(13)-C(1)-C(25 1\_555 1\_555 1\_555 1\_555 # 41 Check

**Author Response: The structure is affected by some strain. Crystal imperfections can not be excluded either.**

PLAT703\_ALERT\_1\_B Torsion Calc -0.9(9), Rep -3.5(14), Dev.. 2.89 Sigma  
N(13)-C(1)-C(25)-C(40 1\_555 1\_555 1\_555 1\_555 # 43 Check

**Author Response: The structure is affected by some strain. Crystal imperfections can not be excluded either.**

PLAT703\_ALERT\_1\_B Torsion Calc 177.6(6), Rep 175.8(9), Dev.. 3.00 Sigma  
C(37)-C(1)-C(25)-C(40 1\_555 1\_555 1\_555 1\_555 # 47 Check

**Author Response: The structure is affected by some strain. Crystal imperfections can not be excluded either.**

PLAT703\_ALERT\_1\_B Torsion Calc -8.8(9), Rep -10.9(14), Dev.. 2.33 Sigma  
C(36)-C(23)-C(26)-C(44 1\_555 1\_555 1\_555 1\_555 # 78 Check

**Author Response: The structure is affected by some strain. Crystal imperfections can not be excluded either.**

PLAT703\_ALERT\_1\_B Torsion Calc -174.3(6), Rep -173.0(9), Dev.. 2.17 Sigma  
C(1)-C(25)-C(40)-C(30 1\_555 1\_555 1\_555 1\_555 # 85 Check

**Author Response: The structure is affected by some strain. Crystal imperfections can not be excluded either.**

PLAT703\_ALERT\_1\_B Torsion Calc 4.2(9), Rep 2.2(14), Dev.. 2.22 Sigma  
C(3)-C(27)-C(49)-N(10 1\_555 1\_555 1\_555 1\_555 # 93 Check

**Author Response: The structure is affected by some strain. Crystal imperfections can not be excluded either.**

PLAT703\_ALERT\_1\_B Torsion Calc      4.5(9), Rep      6.9(13), Dev..      2.67 Sigma  
C(31-C(27-C(49-C(35    1\_555    1\_555    1\_555    1\_555      #    96 Check

**Author Response: The structure is affected by some strain. Crystal imperfections can not be excluded either.**

PLAT703\_ALERT\_1\_B Torsion Calc      -2.7(9), Rep      -5.3(14), Dev..      2.89 Sigma  
C(49-C(27-C(31-C(43    1\_555    1\_555    1\_555    1\_555      #    98 Check

**Author Response: The structure is affected by some strain. Crystal imperfections can not be excluded either.**

PLAT703\_ALERT\_1\_B Torsion Calc      178.7(6), Rep      177.4(9), Dev..      2.17 Sigma  
N(5)-C(28-C(50-C(52    1\_555    1\_555    1\_555    1\_555      #    99 Check

**Author Response: The structure is affected by some strain. Crystal imperfections can not be excluded either.**

PLAT703\_ALERT\_1\_B Torsion Calc      -4.4(9), Rep      -6.3(14), Dev..      2.11 Sigma  
C(2)-C(28-C(50-C(52    1\_555    1\_555    1\_555    1\_555      #    100 Check

**Author Response: The structure is affected by some strain. Crystal imperfections can not be excluded either.**

PLAT703\_ALERT\_1\_B Torsion Calc      -159.5(6), Rep      -157.9(8), Dev..      2.67 Sigma  
C(39-C(35-C(49-N(10    1\_555    1\_555    1\_555    1\_555      #    107 Check

**Author Response: The structure is affected by some strain. Crystal imperfections can not be excluded either.**

PLAT703\_ALERT\_1\_B Torsion Calc      -51.7(7), Rep      -53.7(10), Dev..      2.86 Sigma  
C(49-C(35-C(39-C(43    1\_555    1\_555    1\_555    1\_555      #    109 Check

**Author Response: The structure is affected by some strain. Crystal imperfections can not be excluded either.**

PLAT703\_ALERT\_1\_B Torsion Calc      178.8(6), Rep      -179.8(7), Dev..      2.33 Sigma  
C(19-C(38-C(47-C(52    1\_555    1\_555    1\_555    1\_555      #    112 Check

**Author Response: The structure is affected by some strain. Crystal imperfections can not be excluded either.**

PLAT703\_ALERT\_1\_B Torsion Calc      7.1(11), Rep      10.0(16), Dev..      2.64 Sigma  
C(28-C(50-C(52-C(47    1\_555    1\_555    1\_555    1\_555      #    120 Check

**Author Response: The structure is affected by some strain. Crystal imperfections can not be excluded either.**

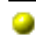

### Alert level C

DIFMN03\_ALERT\_1\_C The minimum difference density is < -0.1\*ZMAX\*0.75  
The relevant atom site should be identified.

DIFMX02\_ALERT\_1\_C The maximum difference density is > 0.1\*ZMAX\*0.75  
The relevant atom site should be identified.

PLAT034\_ALERT\_1\_C No Flack Parameter Given. Z > Si, NonCentro .... Please Do !

PLAT089\_ALERT\_3\_C Poor Data / Parameter Ratio (Zmax < 18) ..... 6.71 Note

PLAT213\_ALERT\_2\_C Atom C21 has ADP max/min Ratio ..... 3.1 prolat

PLAT230\_ALERT\_2\_C Hirshfeld Test Diff for N8 --C21 . 5.5 s.u.

PLAT230\_ALERT\_2\_C Hirshfeld Test Diff for C2 --C28 . 5.4 s.u.

PLAT230\_ALERT\_2\_C Hirshfeld Test Diff for C19 --C32 . 5.4 s.u.

PLAT230\_ALERT\_2\_C Hirshfeld Test Diff for C19 --C38 . 7.0 s.u.

PLAT230\_ALERT\_2\_C Hirshfeld Test Diff for C24 --C31 . 6.8 s.u.

PLAT230\_ALERT\_2\_C Hirshfeld Test Diff for C24 --C34 . 5.2 s.u.

PLAT230\_ALERT\_2\_C Hirshfeld Test Diff for C35 --C39 . 6.2 s.u.

PLAT230\_ALERT\_2\_C Hirshfeld Test Diff for C1 --C37 . 5.4 s.u.

PLAT230\_ALERT\_2\_C Hirshfeld Test Diff for C42 --C45 . 5.7 s.u.

PLAT241\_ALERT\_2\_C High 'MainMol' Ueq as Compared to Neighbors of C39 Check

PLAT241\_ALERT\_2\_C High 'MainMol' Ueq as Compared to Neighbors of C18 Check

PLAT340\_ALERT\_3\_C Low Bond Precision on C-C Bonds ..... 0.00876 Ang.

PLAT369\_ALERT\_2\_C Long C(sp2)-C(sp2) Bond C1 - C25 . 1.54 Ang.

PLAT414\_ALERT\_2\_C Short Intra D-H..H-X H1 ..H18 . 1.95 Ang.

x,y,z = 1\_555 Check

PLAT703\_ALERT\_1\_C Torsion Calc 39.6(6), Rep 40.3(9), Dev.. 1.17 Sigma

O(2)-S(1)-C(2)-C(28) 1\_555 1\_555 1\_555 1\_555 # 3 Check

**Author Response: The structure is affected by some strain. Crystal imperfections can not be excluded either.**

PLAT703\_ALERT\_1\_C Torsion Calc -146.8(5), Rep -146.1(7), Dev.. 1.40 Sigma

O(2)-S(1)-C(2)-C(38) 1\_555 1\_555 1\_555 1\_555 # 4 Check

**Author Response: The structure is affected by some strain. Crystal imperfections can not be excluded either.**

PLAT703\_ALERT\_1\_C Torsion Calc 152.8(5), Rep 153.4(8), Dev.. 1.20 Sigma

N(8)-S(1)-C(2)-C(28) 1\_555 1\_555 1\_555 1\_555 # 9 Check

**Author Response: The structure is affected by some strain. Crystal imperfections can not be excluded either.**

PLAT703\_ALERT\_1\_C Torsion Calc 49.9(5), Rep 50.5(8), Dev.. 1.20 Sigma

C(2)-S(1)-N(8)-N(4) 1\_555 1\_555 1\_555 1\_555 # 11 Check

**Author Response: The structure is affected by some strain. Crystal imperfections can not be excluded either.**

PLAT703\_ALERT\_1\_C Torsion Calc    -176.4(4), Rep    -175.6(6), Dev..    2.00 Sigma  
C(2)-S(1)-N(8)-C(21    1\_555    1\_555    1\_555    1\_555    #    12 Check

**Author Response: The structure is affected by some strain. Crystal imperfections can not be excluded either.**

PLAT703\_ALERT\_1\_C Torsion Calc    -80.2(5), Rep    -79.6(7), Dev..    1.20 Sigma  
O(1)-S(2)-C(33)-C(23    1\_555    1\_555    1\_555    1\_555    #    16 Check

**Author Response: The structure is affected by some strain. Crystal imperfections can not be excluded either.**

PLAT703\_ALERT\_1\_C Torsion Calc    148.9(5), Rep    149.7(7), Dev..    1.60 Sigma  
O(5)-S(2)-C(33)-C(23    1\_555    1\_555    1\_555    1\_555    #    20 Check

**Author Response: The structure is affected by some strain. Crystal imperfections can not be excluded either.**

PLAT703\_ALERT\_1\_C Torsion Calc    37.3(5), Rep    38.2(8), Dev..    1.80 Sigma  
N(2)-S(2)-C(33)-C(23    1\_555    1\_555    1\_555    1\_555    #    22 Check

**Author Response: The structure is affected by some strain. Crystal imperfections can not be excluded either.**

PLAT703\_ALERT\_1\_C Torsion Calc    170.7(6), Rep    169.8(9), Dev..    1.50 Sigma  
C(26)-N(1)-N(2)-C(51    1\_555    1\_555    1\_555    1\_555    #    28 Check

**Author Response: The structure is affected by some strain. Crystal imperfections can not be excluded either.**

PLAT703\_ALERT\_1\_C Torsion Calc    -38.4(6), Rep    -39.1(10), Dev..    1.17 Sigma  
C(19)-N(4)-N(8)-S(1)    1\_555    1\_555    1\_555    1\_555    #    34 Check

**Author Response: The structure is affected by some strain. Crystal imperfections can not be excluded either.**

PLAT703\_ALERT\_1\_C Torsion Calc    -176.6(6), Rep    -177.3(9), Dev..    1.17 Sigma  
C(28)-C(2)-C(38)-C(19    1\_555    1\_555    1\_555    1\_555    #    53 Check

**Author Response: The structure is affected by some strain. Crystal imperfections can not be excluded either.**



PLAT703\_ALERT\_1\_C Torsion Calc -4.7(10), Rep -5.9(15), Dev.. 1.20 Sigma  
C(27-C(3)-C(41-C(34 1\_555 1\_555 1\_555 1\_555 # 57 Check

**Author Response: The structure is affected by some strain. Crystal imperfections can not be excluded either.**

PLAT703\_ALERT\_1\_C Torsion Calc 1.0(9), Rep -0.3(11), Dev.. 1.44 Sigma  
C(41-C(3)-C(27-C(31 1\_555 1\_555 1\_555 1\_555 # 58 Check

**Author Response: The structure is affected by some strain. Crystal imperfections can not be excluded either.**

PLAT703\_ALERT\_1\_C Torsion Calc 175.7(6), Rep 174.6(8), Dev.. 1.83 Sigma  
N(3)-C(16-C(20-C(18 1\_555 1\_555 1\_555 1\_555 # 60 Check

**Author Response: The structure is affected by some strain. Crystal imperfections can not be excluded either.**

PLAT703\_ALERT\_1\_C Torsion Calc 3.4(9), Rep 2.4(12), Dev.. 1.11 Sigma  
C(20-C(16-C(33-C(23 1\_555 1\_555 1\_555 1\_555 # 64 Check

**Author Response: The structure is affected by some strain. Crystal imperfections can not be excluded either.**

PLAT703\_ALERT\_1\_C Torsion Calc 5.0(10), Rep 6.2(13), Dev.. 1.20 Sigma  
C(36-C(18-C(20-C(16 1\_555 1\_555 1\_555 1\_555 # 67 Check

**Author Response: The structure is affected by some strain. Crystal imperfections can not be excluded either.**

PLAT703\_ALERT\_1\_C Torsion Calc -168.7(6), Rep -169.5(9), Dev.. 1.33 Sigma  
N(4)-C(19-C(38-C(47 1\_555 1\_555 1\_555 1\_555 # 69 Check

**Author Response: The structure is affected by some strain. Crystal imperfections can not be excluded either.**

PLAT703\_ALERT\_1\_C Torsion Calc 10.6(9), Rep 9.3(14), Dev.. 1.44 Sigma  
C(32-C(19-C(38-C(47 1\_555 1\_555 1\_555 1\_555 # 71 Check

**Author Response: The structure is affected by some strain. Crystal imperfections can not be excluded either.**

PLAT703\_ALERT\_1\_C Torsion Calc -11.8(8), Rep -13.2(12), Dev.. 1.75 Sigma  
C(26-C(23-C(33-S(2) 1\_555 1\_555 1\_555 1\_555 # 72 Check

**Author Response: The structure is affected by some strain. Crystal imperfections can not be excluded either.**

PLAT703\_ALERT\_1\_C Torsion Calc -12.6(10), Rep -11.5(15), Dev.. 1.10 Sigma  
C(33-C(23-C(26-N(1) 1\_555 1\_555 1\_555 1\_555 # 74 Check

**Author Response: The structure is affected by some strain. Crystal imperfections can not be excluded either.**

PLAT703\_ALERT\_1\_C Torsion Calc -175.9(7), Rep -174.6(9), Dev.. 1.86 Sigma  
C(26-C(23-C(36-C(18 1\_555 1\_555 1\_555 1\_555 # 76 Check

**Author Response: The structure is affected by some strain. Crystal imperfections can not be excluded either.**

PLAT703\_ALERT\_1\_C Torsion Calc 165.6(7), Rep 164.6(10), Dev.. 1.43 Sigma  
C(36-C(23-C(26-N(1) 1\_555 1\_555 1\_555 1\_555 # 77 Check

**Author Response: The structure is affected by some strain. Crystal imperfections can not be excluded either.**

PLAT703\_ALERT\_1\_C Torsion Calc 169.8(5), Rep 170.5(7), Dev.. 1.40 Sigma  
C(36-C(23-C(33-S(2) 1\_555 1\_555 1\_555 1\_555 # 80 Check

**Author Response: The structure is affected by some strain. Crystal imperfections can not be excluded either.**

PLAT703\_ALERT\_1\_C Torsion Calc -2.1(9), Rep -0.5(11), Dev.. 1.78 Sigma  
C(36-C(23-C(33-C(16 1\_555 1\_555 1\_555 1\_555 # 81 Check

**Author Response: The structure is affected by some strain. Crystal imperfections can not be excluded either.**

PLAT703\_ALERT\_1\_C Torsion Calc 175.9(6), Rep 176.7(9), Dev.. 1.33 Sigma  
C(40-C(25-C(42-C(46 1\_555 1\_555 1\_555 1\_555 # 89 Check

**Author Response: The structure is affected by some strain. Crystal imperfections can not be excluded either.**

PLAT703\_ALERT\_1\_C Torsion Calc -177.7(5), Rep -178.6(8), Dev.. 1.80 Sigma  
C(3)-C(27-C(49-C(35 1\_555 1\_555 1\_555 1\_555 # 94 Check

**Author Response: The structure is affected by some strain. Crystal imperfections can not be excluded either.**

PLAT703\_ALERT\_1\_C Torsion Calc -173.5(6), Rep -172.3(9), Dev.. 2.00 Sigma  
C(31-C(27-C(49-N(10 1\_555 1\_555 1\_555 1\_555 # 95 Check

**Author Response: The structure is affected by some strain. Crystal imperfections can not be excluded either.**

PLAT703\_ALERT\_1\_C Torsion Calc 1.0(11), Rep 2.3(16), Dev.. 1.18 Sigma  
C(45-C(29-C(30-C(40 1\_555 1\_555 1\_555 1\_555 # 102 Check

**Author Response: The structure is affected by some strain. Crystal imperfections can not be excluded either.**

PLAT703\_ALERT\_1\_C Torsion Calc 2.8(10), Rep 4.4(14), Dev.. 1.60 Sigma  
C(24-C(34-C(41-C(3) 1\_555 1\_555 1\_555 1\_555 # 106 Check

**Author Response: The structure is affected by some strain. Crystal imperfections can not be excluded either.**

PLAT703\_ALERT\_1\_C Torsion Calc 50.9(7), Rep 50.0(10), Dev.. 1.29 Sigma  
C(1)-C(37-C(48-C(46 1\_555 1\_555 1\_555 1\_555 # 110 Check

**Author Response: The structure is affected by some strain. Crystal imperfections can not be excluded either.**

PLAT703\_ALERT\_1\_C Torsion Calc 35.3(9), Rep 36.8(12), Dev.. 1.67 Sigma  
C(25-C(42-C(46-C(48 1\_555 1\_555 1\_555 1\_555 # 115 Check

**Author Response: The structure is affected by some strain. Crystal imperfections can not be excluded either.**

PLAT703\_ALERT\_1\_C Torsion Calc -55.2(7), Rep -54.0(10), Dev.. 1.71 Sigma  
C(42-C(46-C(48-C(37 1\_555 1\_555 1\_555 1\_555 # 118 Check

**Author Response: The structure is affected by some strain. Crystal imperfections can not be excluded either.**

PLAT703\_ALERT\_1\_C Torsion Calc -5.0(10), Rep -6.9(15), Dev.. 1.90 Sigma  
C(38-C(47-C(52-C(50 1\_555 1\_555 1\_555 1\_555 # 119 Check

**Author Response: The structure is affected by some strain. Crystal imperfections can not be excluded either.**

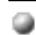

#### **Alert level G**

PLAT005\_ALERT\_5\_G No Embedded Refinement Details Found in the CIF Please Do !

|                   |                                                  |     |              |
|-------------------|--------------------------------------------------|-----|--------------|
| PLAT007_ALERT_5_G | Number of Unrefined Donor-H Atoms .....          | 2   | Report       |
|                   | H1 H2                                            |     |              |
| PLAT199_ALERT_1_G | Reported _cell_measurement_temperature ..... (K) | 293 | Check        |
| PLAT200_ALERT_1_G | Reported _diffn_ambient_temperature ..... (K)    | 293 | Check        |
| PLAT790_ALERT_4_G | Centre of Gravity not Within Unit Cell: Resd. #  | 2   | Note         |
|                   | C19 H20 N4 O2 S                                  |     |              |
| PLAT808_ALERT_5_G | No Parseable SHELXL Style Weighting Scheme Found |     | Please Check |
| PLAT882_ALERT_1_G | No Datum for _diffn_reflms_av_unetI/netI .....   |     | Please Do !  |
| PLAT883_ALERT_1_G | Absent Datum for _atom_sites_solution_primary .. |     | Please Do !  |

---

18 **ALERT level A** = Most likely a serious problem - resolve or explain  
26 **ALERT level B** = A potentially serious problem, consider carefully  
52 **ALERT level C** = Check. Ensure it is not caused by an omission or oversight  
8 **ALERT level G** = General information/check it is not something unexpected

69 ALERT type 1 CIF construction/syntax error, inconsistent or missing data  
28 ALERT type 2 Indicator that the structure model may be wrong or deficient  
3 ALERT type 3 Indicator that the structure quality may be low  
1 ALERT type 4 Improvement, methodology, query or suggestion  
3 ALERT type 5 Informative message, check

---

It is advisable to attempt to resolve as many as possible of the alerts in all categories. Often the minor alerts point to easily fixed oversights, errors and omissions in your CIF or refinement strategy, so attention to these fine details can be worthwhile. In order to resolve some of the more serious problems it may be necessary to carry out additional measurements or structure refinements. However, the purpose of your study may justify the reported deviations and the more serious of these should normally be commented upon in the discussion or experimental section of a paper or in the "special\_details" fields of the CIF. checkCIF was carefully designed to identify outliers and unusual parameters, but every test has its limitations and alerts that are not important in a particular case may appear. Conversely, the absence of alerts does not guarantee there are no aspects of the results needing attention. It is up to the individual to critically assess their own results and, if necessary, seek expert advice.

### Publication of your CIF in IUCr journals

A basic structural check has been run on your CIF. These basic checks will be run on all CIFs submitted for publication in IUCr journals (*Acta Crystallographica*, *Journal of Applied Crystallography*, *Journal of Synchrotron Radiation*); however, if you intend to submit to *Acta Crystallographica Section C* or *E* or *IUCrData*, you should make sure that full publication checks are run on the final version of your CIF prior to submission.

### Publication of your CIF in other journals

Please refer to the *Notes for Authors* of the relevant journal for any special instructions relating to CIF submission.

### Validation response form

Please find below a validation response form (VRF) that can be filled in and pasted into your CIF.

```
# start Validation Reply Form
_vrf_REFLT02__143519_2
;
PROBLEM: The number of reflections greater than the sigma threshold
RESPONSE: ...
;
_vrf_DIFMN03__143519_2
;
PROBLEM: The minimum difference density is < -0.1*ZMAX*0.75
RESPONSE: ...
;
_vrf_DIFMX02__143519_2
;
PROBLEM: The maximum difference density is > 0.1*ZMAX*0.75
RESPONSE: ...
;
_vrf_PLAT111__143519_2
;
PROBLEM: ADDSYM Detects New (Pseudo) Centre of Symmetry .          100 %Fit
RESPONSE: ...
;
_vrf_PLAT113__143519_2
;
PROBLEM: ADDSYM Suggests Possible Pseudo/New Space Group          P-1 Check
RESPONSE: ...
;
_vrf_PLAT230__143519_2
;
PROBLEM: Hirshfeld Test Diff for      S1          --O3          .      10.0 s.u.
RESPONSE: ...
;
_vrf_PLAT034__143519_2
;
PROBLEM: No Flack Parameter Given. Z > Si, NonCentro ....      Please Do !
RESPONSE: ...
;
_vrf_PLAT089__143519_2
;
PROBLEM: Poor Data / Parameter Ratio (Zmax < 18) .....      6.71 Note
RESPONSE: ...
;
_vrf_PLAT213__143519_2
;
PROBLEM: Atom C21          has ADP max/min Ratio .....      3.1 prolat
RESPONSE: ...
;
_vrf_PLAT241__143519_2
;
PROBLEM: High 'MainMol' Ueq as Compared to Neighbors of          C39 Check
RESPONSE: ...
;
_vrf_PLAT340__143519_2
;
PROBLEM: Low Bond Precision on C-C Bonds .....      0.00876 Ang.
RESPONSE: ...
```

```

;
_vrf_PLAT369__143519_2
;
PROBLEM: Long C(sp2)-C(sp2) Bond C1 - C25 . 1.54 Ang.
RESPONSE: ...
;
_vrf_PLAT414__143519_2
;
PROBLEM: Short Intra D-H...H-X H1 ..H18 . 1.95 Ang.
RESPONSE: ...
;
# end Validation Reply Form

```

PLATON version of 02/02/2025; check.def file version of 02/02/2025

Datablock \_143519\_2 - ellipsoid plot

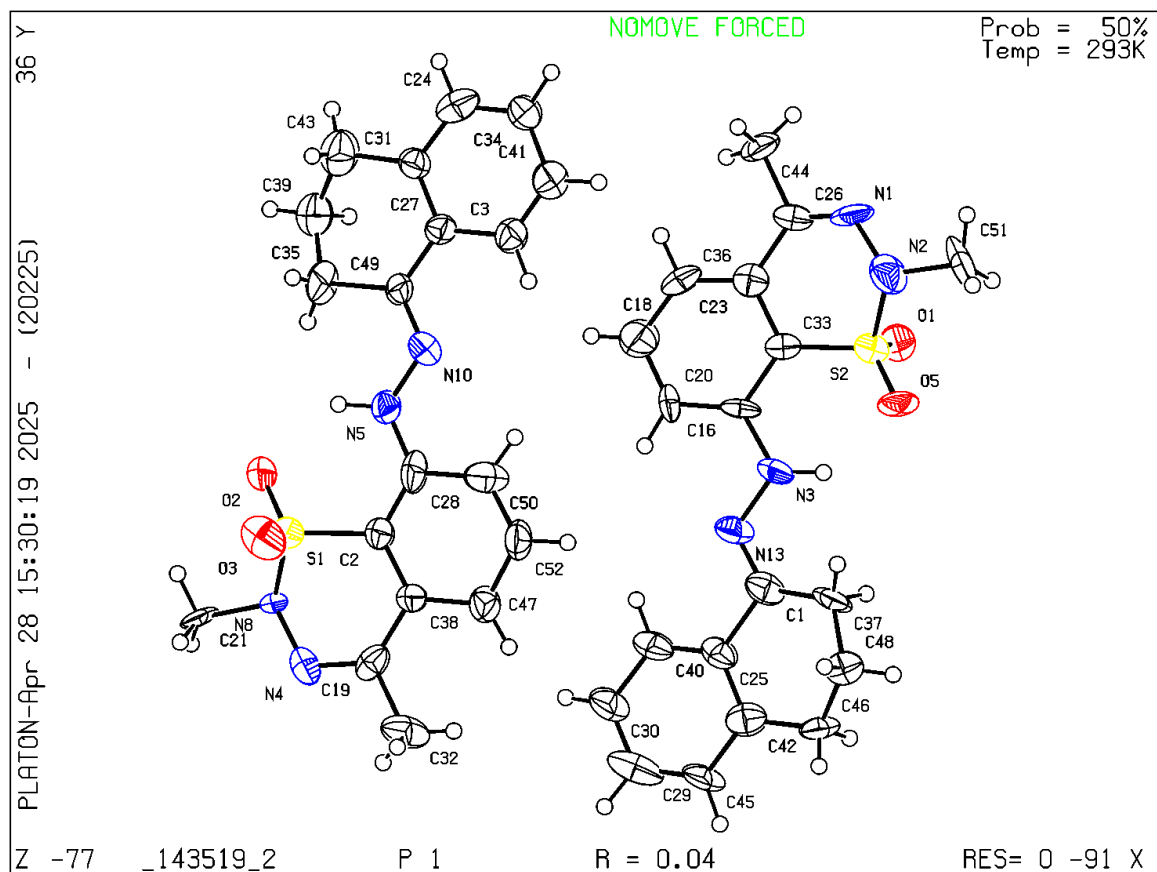

Supplement: Additional file 2 [file (E)-9a_checkcif.pdf › Átnevezett XRD/(E)-9a_checkcif.pdf]
