# Supplementary material for: Thiadiazino-indole, thiadiazino-carbazole and benzothiadiazino-carbazole dioxides: synthesis, physicochemical and early ADME characterization of representatives of new tri-, tetra- and pentacyclic ring systems and their intermediates
Source: publisher site journal article supplement (doi:10.3762/bjoc.21.169), 2025-10-21
Supplement: Additional file 2 [file (E)-9a_xrd.pdf › Átnevezett XRD/(E)-9a_xrd.pdf]

**143519**

**PGY0782\_1**

Submitted by: Pusztai Gyongyver  
Operator: Dancso Andras

## X-ray Structure Report

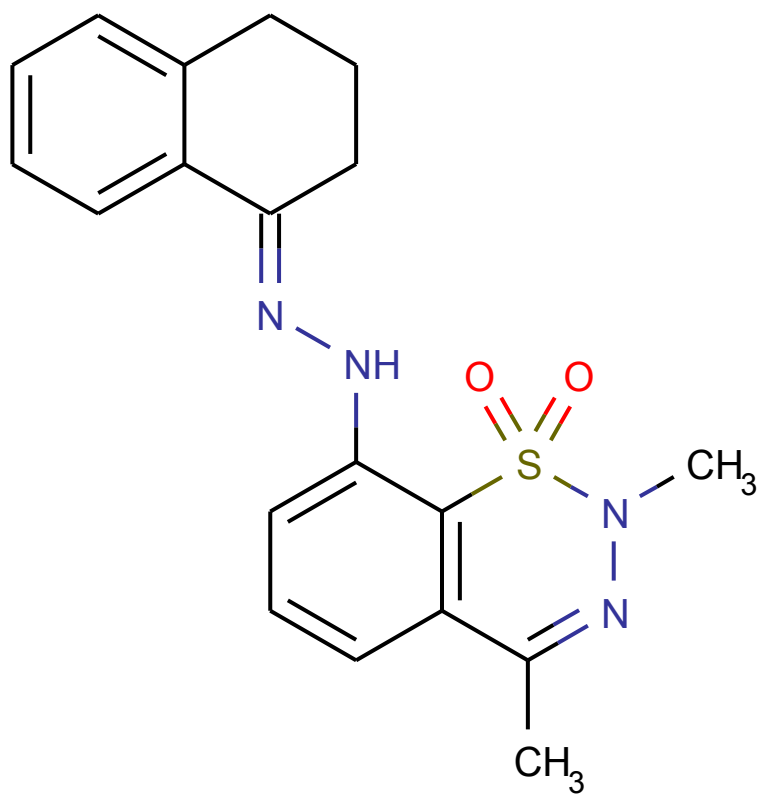

November 18, 2024

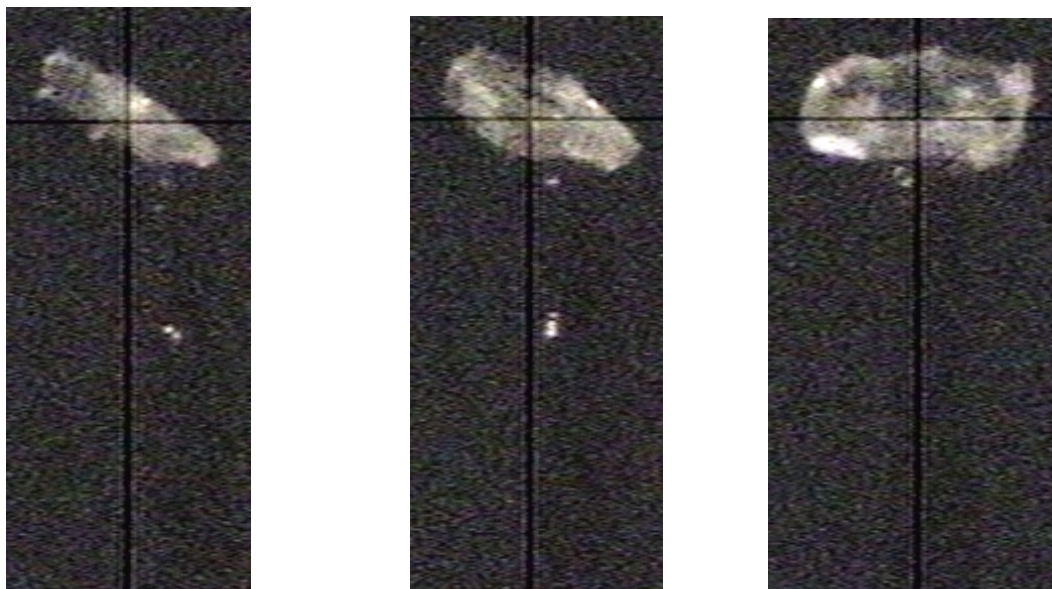

Fig. 1. The crystal

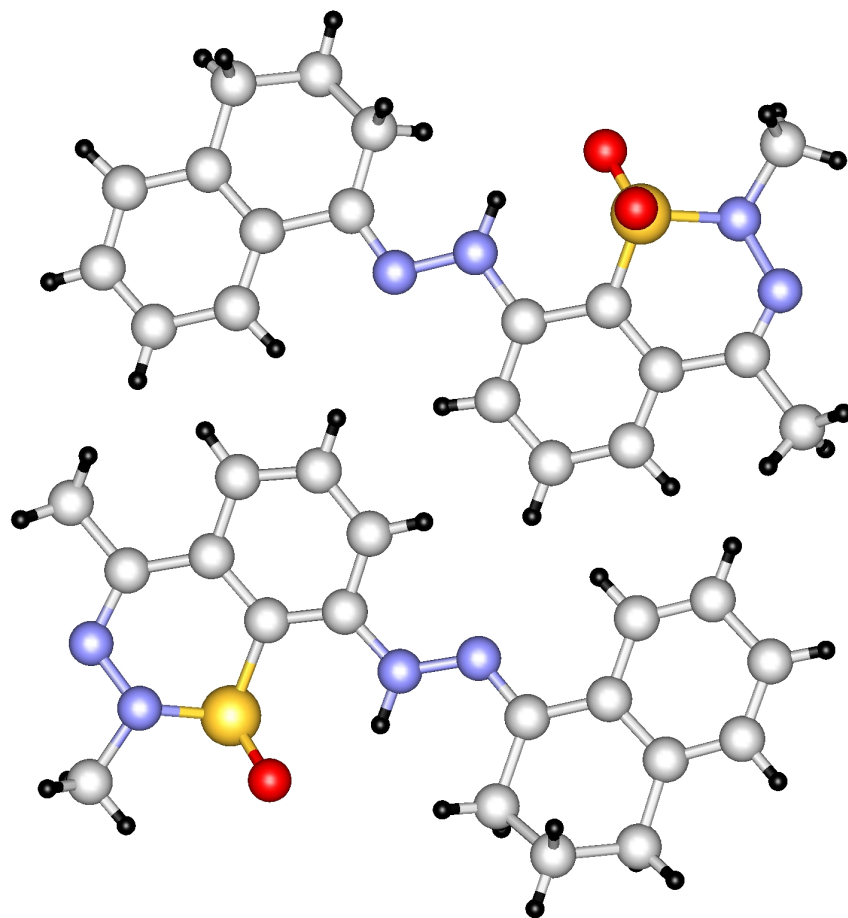

Fig. 2. Molecules in pair (hydrogens were generated by the software)

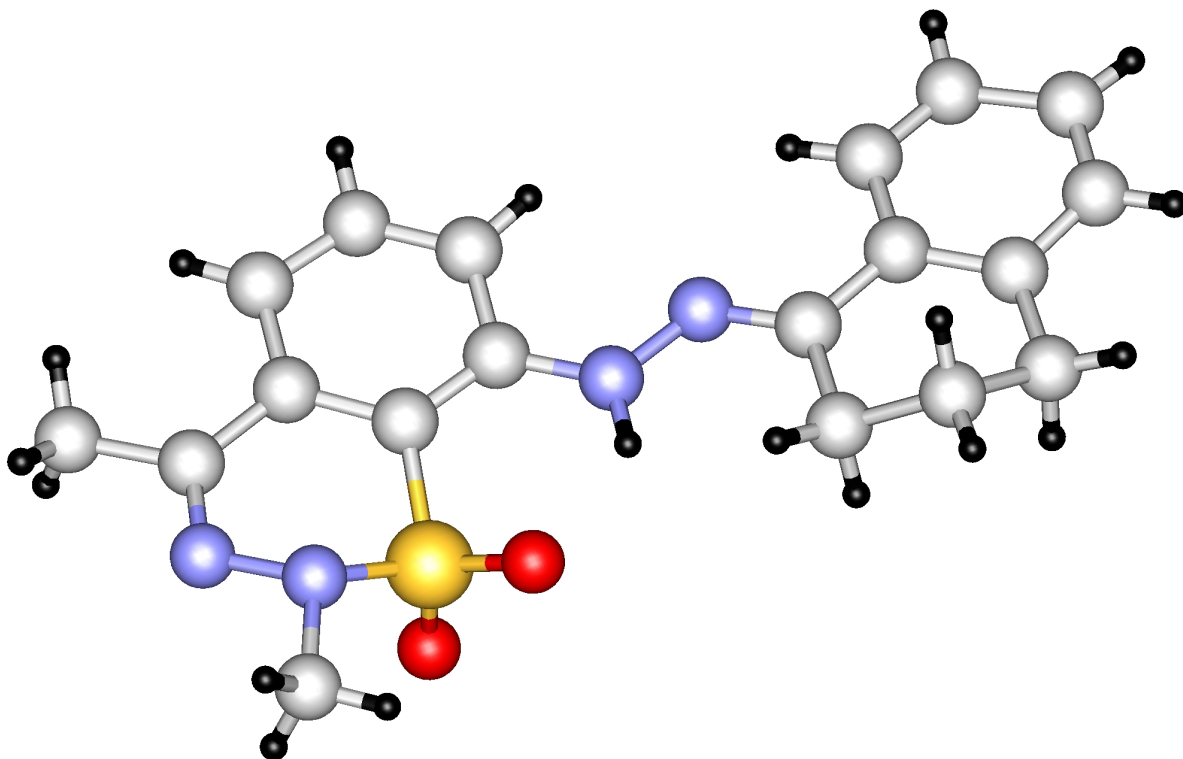

Fig. 3. Fragment 1

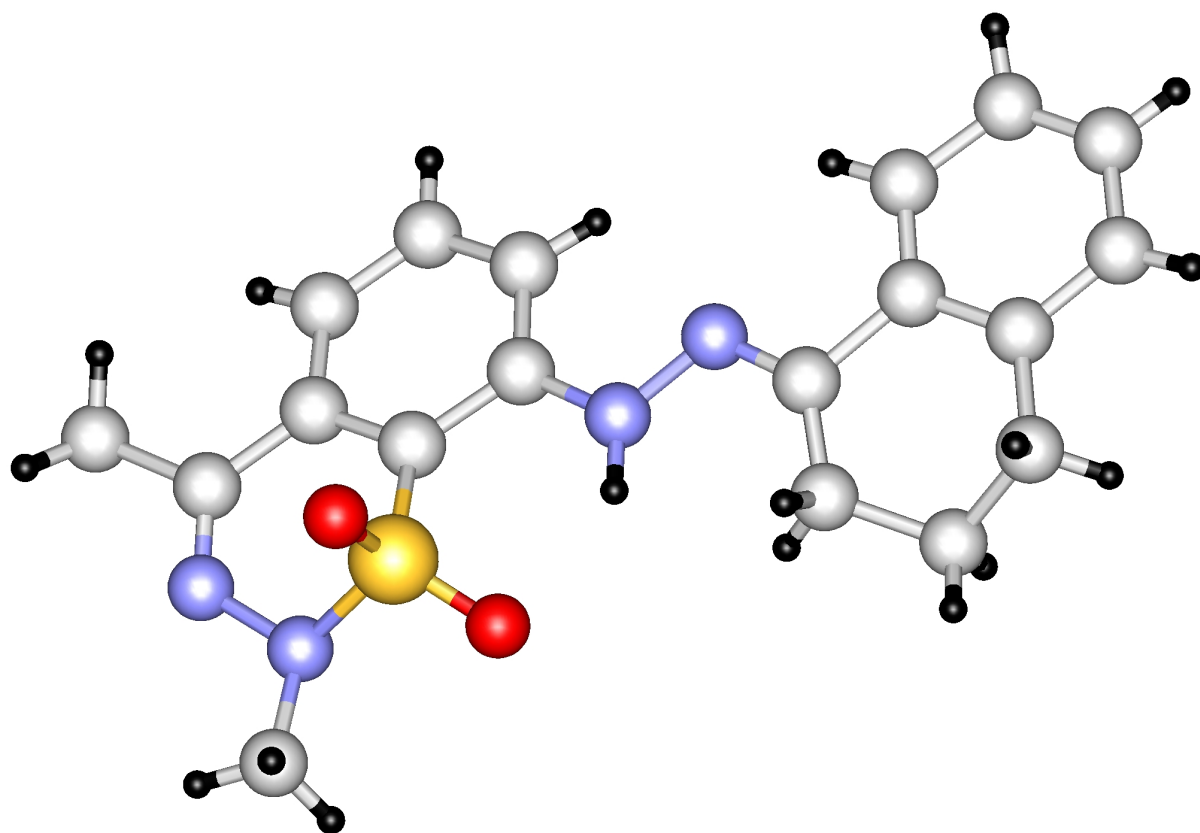

Fig. 4. Fragment 2

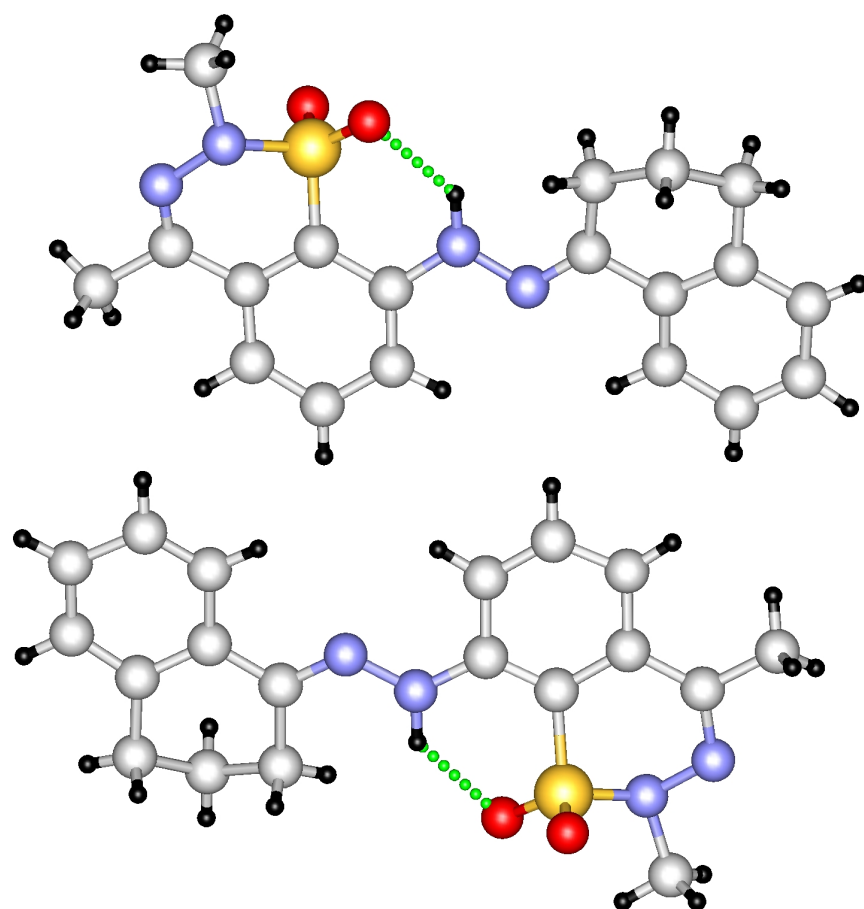

Fig. 5. Hydrogen bonds

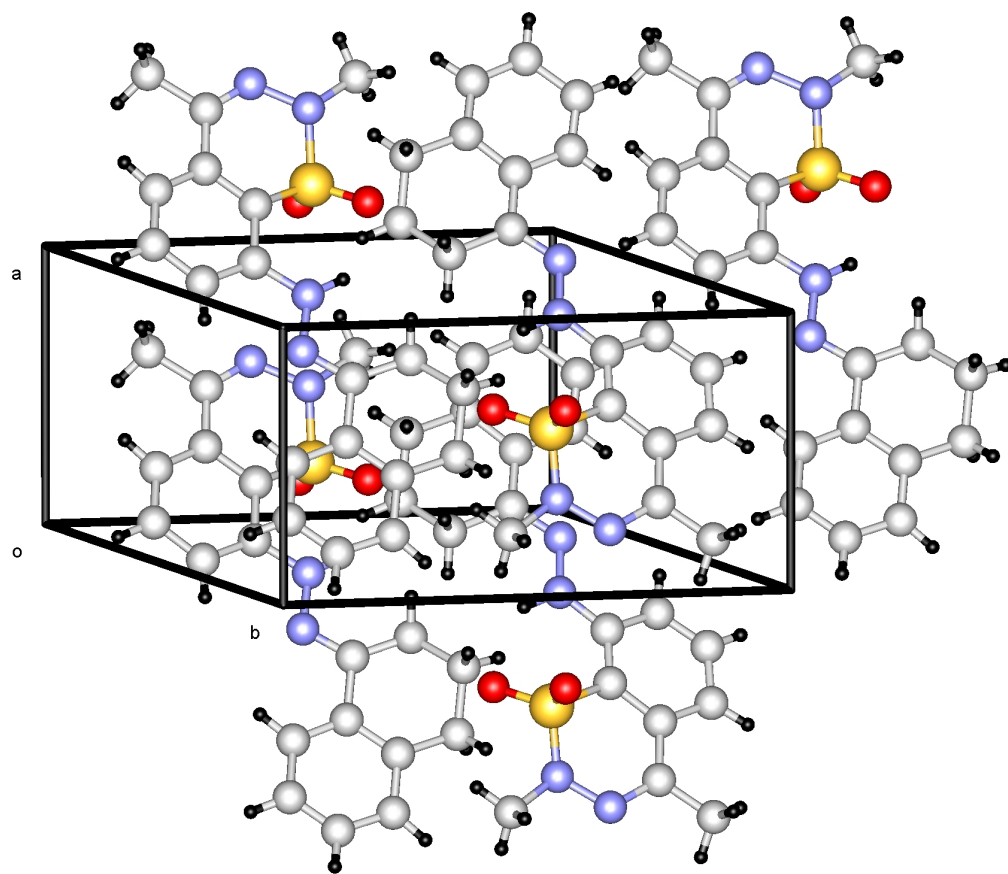

Fig. 6. Packing

## *Experimental*

### Data Collection

A colorless chunk crystal of  $C_{19}H_{20}N_4O_2S$  having approximate dimensions of 0.33 x 0.28 x 0.07 mm was mounted on a cactus needle. All measurements were made on a Rigaku RAXIS RAPID imaging plate area detector with graphite monochromated Cu-K $\alpha$  radiation.

Indexing was performed from 4 oscillations that were exposed for 600 seconds. The crystal-to-detector distance was 127.40 mm.

Cell constants and an orientation matrix for data collection corresponded to a primitive triclinic cell with dimensions:

$$\begin{aligned}a &= 6.3364(8) \text{ \AA} & \alpha &= 94.676(9)^\circ \\b &= 9.2356(13) \text{ \AA} & \beta &= 95.441(7)^\circ \\c &= 15.0269(18) \text{ \AA} & \gamma &= 93.115(8)^\circ \\V &= 870.80(19) \text{ \AA}^3\end{aligned}$$

For  $Z = 2$  and F.W. = 368.45, the calculated density is 1.405 g/cm<sup>3</sup>. Based on a statistical analysis of intensity distribution, and the successful solution and refinement of the structure, the space group was determined to be:

### P1 (#1)

The data were collected at a temperature of  $20 \pm 1^\circ\text{C}$  to a maximum  $2\theta$  value of  $143.3^\circ$ . A total of 180 oscillation images were collected. A sweep of data was done using  $\omega$  scans from  $20.0$  to  $200.0^\circ$  in  $5.0^\circ$  step, at  $\chi=0.0^\circ$  and  $\phi = 0.0^\circ$ . The exposure rate was 120.0 [sec./ $^\circ$ ]. A second sweep was performed using  $\omega$  scans from  $20.0$  to  $200.0^\circ$  in  $5.0^\circ$  step, at  $\chi=54.0^\circ$  and  $\phi = 0.0^\circ$ . The exposure rate was 120.0 [sec./ $^\circ$ ]. Another sweep was performed using  $\omega$  scans from  $20.0$  to  $200.0^\circ$  in  $5.0^\circ$  step, at  $\chi=54.0^\circ$  and  $\phi = 90.0^\circ$ . The exposure rate was 120.0 [sec./ $^\circ$ ]. Another sweep was performed using  $\omega$  scans from  $20.0$  to  $200.0^\circ$  in  $5.0^\circ$  step, at  $\chi=54.0^\circ$  and  $\phi = 180.0^\circ$ . The exposure rate was 120.0 [sec./ $^\circ$ ]. Another sweep was performed using  $\omega$  scans from  $20.0$  to  $200.0^\circ$  in  $5.0^\circ$  step, at  $\chi=54.0^\circ$  and  $\phi = 270.0^\circ$ . The exposure rate was 120.0 [sec./ $^\circ$ ]. The crystal-to-detector distance was 127.40 mm. Readout was performed in the 0.100 mm pixel mode.



## Data Reduction

Of the 9993 reflections that were collected, 5016 were unique ( $R_{\text{int}} = 0.031$ ).

The linear absorption coefficient,  $\mu$ , for Cu-K $\alpha$  radiation is  $18.355 \text{ cm}^{-1}$ . The data were corrected for Lorentz and polarization effects.

## Structure Solution and Refinement

The structure was solved by direct methods<sup>1</sup> and expanded using Fourier techniques<sup>2</sup>. The non-hydrogen atoms were refined anisotropically. Hydrogen atoms were refined using the riding model. The final cycle of full-matrix least-squares refinement<sup>3</sup> on  $F$  was based on 7963 observed reflections ( $I > 2.00\sigma(I)$ ) and 509 variable parameters and converged (largest parameter shift was 4.81 times its esd) with unweighted and weighted agreement factors of:

$$R = \Sigma ||F_o| - |F_c|| / \Sigma |F_o| = 0.0469$$

$$R_w = [ \Sigma w (|F_o| - |F_c|)^2 / \Sigma w F_o^2 ]^{1/2} = 0.0449$$

The standard deviation of an observation of unit weight<sup>4</sup> was 1.64. Unit weights were used. Plots of  $\Sigma w (|F_o| - |F_c|)^2$  versus  $|F_o|$ , reflection order in data collection,  $\sin \theta/\lambda$  and various classes of indices showed no unusual trends. The maximum and minimum peaks on the final difference Fourier map corresponded to 3.27 and -13.30  $\text{e}^{-}/\text{\AA}^3$ , respectively.

Neutral atom scattering factors were taken from Cromer and Waber<sup>5</sup>. Anomalous dispersion effects were included in  $F_{\text{calc}}$ <sup>6</sup>; the values for  $\Delta f'$  and  $\Delta f''$  were those of Creagh and McAuley<sup>7</sup>. The values for the mass attenuation coefficients are those of Creagh and Hubbell<sup>8</sup>. All calculations were performed using the CrystalStructure<sup>9,10</sup> crystallographic software package.

## *References*

- (1) SIR92: Altomare, A., Cascarano, G., Giacovazzo, C., Guagliardi, A., Burla, M., Polidori, G., and Camalli, M. (1994) J. Appl. Cryst., 27, 435.
- (2) DIRDIF99: Beurskens, P.T., Admiraal, G., Beurskens, G., Bosman, W.P., de Gelder, R., Israel, R. and Smits, J.M.M.(1999). The DIRDIF-99 program system, Technical Report of the Crystallography Laboratory, University of Nijmegen, The Netherlands.

(3) Least Squares function minimized:

$$\sum w(|F_o| - |F_c|)^2 \quad \text{where } w = \text{Least Squares weights.}$$

(4) Standard deviation of an observation of unit weight:

$$[\sum w(|F_o| - |F_c|)^2 / (N_o - N_v)]^{1/2}$$

where:  $N_o$  = number of observations

$N_v$  = number of variables

(5) Cromer, D. T. & Waber, J. T.; "International Tables for X-ray Crystallography", Vol. IV, The Kynoch Press, Birmingham, England, Table 2.2 A (1974).

(6) Ibers, J. A. & Hamilton, W. C.; Acta Crystallogr., 17, 781 (1964).

(7) Creagh, D. C. & McAuley, W.J. ; "International Tables for Crystallography", Vol C, (A.J.C. Wilson, ed.), Kluwer Academic Publishers, Boston, Table 4.2.6.8, pages 219-222 (1992).

(8) Creagh, D. C. & Hubbell, J.H.; "International Tables for Crystallography", Vol C, (A.J.C. Wilson, ed.), Kluwer Academic Publishers, Boston, Table 4.2.4.3, pages 200-206 (1992).

(9) CrystalStructure 3.7.0: Crystal Structure Analysis Package, Rigaku and Rigaku/MSO (2000-2005). 9009 New Trails Dr. The Woodlands TX 77381 USA.

(10) CRYSTALS Issue 10: Watkin, D.J., Prout, C.K. Carruthers, J.R. & Betteridge, P.W. Chemical Crystallography Laboratory, Oxford, UK. (1996)

## EXPERIMENTAL DETAILS

### A. Crystal Data

|                         |                                                                                                                                                                                                                         |
|-------------------------|-------------------------------------------------------------------------------------------------------------------------------------------------------------------------------------------------------------------------|
| Empirical Formula       | $\text{C}_{19}\text{H}_{20}\text{N}_4\text{O}_2\text{S}$                                                                                                                                                                |
| Formula Weight          | 368.45                                                                                                                                                                                                                  |
| Crystal Color, Habit    | colorless, chunk                                                                                                                                                                                                        |
| Crystal Dimensions      | 0.33 X 0.28 X 0.07 mm                                                                                                                                                                                                   |
| Crystal System          | triclinic                                                                                                                                                                                                               |
| Lattice Type            | Primitive                                                                                                                                                                                                               |
| Indexing Images         | 4 oscillations @ 600.0 seconds                                                                                                                                                                                          |
| Detector Position       | 127.40 mm                                                                                                                                                                                                               |
| Pixel Size              | 0.100 mm                                                                                                                                                                                                                |
| Lattice Parameters      | $a = 6.3364(8) \text{ \AA}$<br>$b = 9.2356(13) \text{ \AA}$<br>$c = 15.0269(18) \text{ \AA}$<br>$\alpha = 94.676(9)^\circ$<br>$\beta = 95.441(7)^\circ$<br>$\gamma = 93.115(8)^\circ$<br>$V = 870.80(19) \text{ \AA}^3$ |
| Space Group             | P1 (#1)                                                                                                                                                                                                                 |
| Z value                 | 2                                                                                                                                                                                                                       |
| $D_{\text{calc}}$       | $1.405 \text{ g/cm}^3$                                                                                                                                                                                                  |
| F <sub>000</sub>        | 388.00                                                                                                                                                                                                                  |
| $\mu(\text{CuK}\alpha)$ | $18.355 \text{ cm}^{-1}$                                                                                                                                                                                                |

## B. Intensity Measurements

|                                                           |                                                                 |
|-----------------------------------------------------------|-----------------------------------------------------------------|
| Diffractometer                                            | Rigaku RAXIS-RAPID                                              |
| Radiation                                                 | CuK $\alpha$ ( $\lambda$ = 1.54187 Å)<br>graphite monochromated |
| Detector Aperture                                         | 280 mm x 256 mm                                                 |
| Data Images                                               | 180 exposures                                                   |
| $\omega$ oscillation Range ( $\chi$ =0.0, $\phi$ =0.0)    | 20.0 - 200.0 $^{\circ}$                                         |
| Exposure Rate                                             | 120.0 sec./ $^{\circ}$                                          |
| $\omega$ oscillation Range ( $\chi$ =54.0, $\phi$ =0.0)   | 20.0 - 200.0 $^{\circ}$                                         |
| Exposure Rate                                             | 120.0 sec./ $^{\circ}$                                          |
| $\omega$ oscillation Range ( $\chi$ =54.0, $\phi$ =90.0)  | 20.0 - 200.0 $^{\circ}$                                         |
| Exposure Rate                                             | 120.0 sec./ $^{\circ}$                                          |
| $\omega$ oscillation Range ( $\chi$ =54.0, $\phi$ =180.0) | 20.0 - 200.0 $^{\circ}$                                         |
| Exposure Rate                                             | 120.0 sec./ $^{\circ}$                                          |
| $\omega$ oscillation Range ( $\chi$ =54.0, $\phi$ =270.0) | 20.0 - 200.0 $^{\circ}$                                         |
| Exposure Rate                                             | 120.0 sec./ $^{\circ}$                                          |
| Detector Position                                         | 127.40 mm                                                       |
| Pixel Size                                                | 0.100 mm                                                        |
| $2\theta_{\max}$                                          | 143.3 $^{\circ}$                                                |
| No. of Reflections Measured                               | Total: 9993<br>Unique: 5016 ( $R_{\text{int}}$ = 0.031)         |
| Corrections                                               | Lorentz-polarization                                            |

### C. Structure Solution and Refinement

|                                          |                                |
|------------------------------------------|--------------------------------|
| Structure Solution                       | Direct Methods (SIR92)         |
| Refinement                               | Full-matrix least-squares on F |
| Function Minimized                       | $\Sigma w ( Fo  -  Fc )^2$     |
| Least Squares Weights                    | 1                              |
| $2\theta_{\text{max}}$ cutoff            | 143.3 $^{\circ}$               |
| Anomalous Dispersion                     | All non-hydrogen atoms         |
| No. Observations ( $I > 2.00\sigma(I)$ ) | 7963                           |
| No. Variables                            | 509                            |
| Reflection/Parameter Ratio               | 15.64                          |
| Residuals: R ( $I > 2.00\sigma(I)$ )     | 0.0469                         |
| Residuals: Rw ( $I > 2.00\sigma(I)$ )    | 0.0449                         |
| Goodness of Fit Indicator                | 1.639                          |
| Max Shift/Error in Final Cycle           | 4.810                          |
| Maximum peak in Final Diff. Map          | 3.27 e $^{-}/\text{\AA}^3$     |
| Minimum peak in Final Diff. Map          | -13.30 e $^{-}/\text{\AA}^3$   |

Table 1. Atomic coordinates and B<sub>iso</sub>/B<sub>eq</sub>

| atom  | x          | y          | z           | B <sub>eq</sub> |
|-------|------------|------------|-------------|-----------------|
| S(1)  | 0.5682(4)  | 0.8768(3)  | 0.58580(19) | 3.97(6)         |
| S(2)  | 1.3626(4)  | 0.5331(3)  | 1.27549(19) | 3.68(6)         |
| O(1)  | 1.2600(9)  | 0.4068(7)  | 1.3080(4)   | 4.41(16)        |
| O(2)  | 0.5962(11) | 0.7323(8)  | 0.5388(4)   | 5.75(19)        |
| O(3)  | 0.6695(10) | 1.0020(8)  | 0.5547(4)   | 5.35(19)        |
| O(5)  | 1.3368(9)  | 0.6668(7)  | 1.3233(4)   | 4.25(16)        |
| N(1)  | 1.6931(12) | 0.4090(9)  | 1.2129(5)   | 4.2(2)          |
| N(2)  | 1.6336(11) | 0.5200(9)  | 1.2754(5)   | 4.49(18)        |
| N(3)  | 1.0186(11) | 0.7019(8)  | 1.1888(5)   | 4.03(19)        |
| N(4)  | 0.2365(10) | 0.9995(8)  | 0.6435(5)   | 3.48(18)        |
| N(5)  | 0.9246(10) | 0.7136(8)  | 0.6784(5)   | 3.29(18)        |
| N(8)  | 0.3197(10) | 0.8953(8)  | 0.5881(4)   | 2.73(15)        |
| N(10) | 1.1009(11) | 0.6492(8)  | 0.7097(5)   | 3.47(19)        |
| N(13) | 0.8347(11) | 0.7590(9)  | 1.1509(5)   | 3.9(2)          |
| C(1)  | 0.7598(13) | 0.8538(11) | 1.2042(6)   | 3.5(2)          |
| C(2)  | 0.6429(14) | 0.8721(10) | 0.7031(5)   | 3.27(19)        |
| C(3)  | 1.4567(14) | 0.5287(10) | 0.7882(6)   | 3.9(2)          |
| C(16) | 1.1119(11) | 0.6088(8)  | 1.1265(6)   | 3.4(2)          |
| C(18) | 1.1529(13) | 0.5012(11) | 0.9785(6)   | 5.2(2)          |
| C(19) | 0.3374(15) | 1.0249(10) | 0.7276(6)   | 3.5(2)          |
| C(20) | 1.0400(13) | 0.5851(10) | 1.0356(5)   | 3.09(19)        |
| C(21) | 0.1955(10) | 0.8925(8)  | 0.4981(4)   | 3.34(17)        |
| C(23) | 1.4026(13) | 0.4453(10) | 1.1063(6)   | 3.6(2)          |
| C(24) | 1.6523(15) | 0.3318(10) | 0.6861(6)   | 4.4(2)          |
| C(25) | 0.5524(14) | 0.9121(11) | 1.1654(6)   | 3.6(2)          |
| C(26) | 1.5956(14) | 0.3780(11) | 1.1404(6)   | 3.5(2)          |
| C(27) | 1.3705(13) | 0.4868(10) | 0.6983(6)   | 2.6(2)          |
| C(28) | 0.8133(15) | 0.8023(11) | 0.7305(5)   | 3.5(2)          |
| C(29) | 0.1928(16) | 1.0347(11) | 1.0905(8)   | 5.6(3)          |
| C(30) | 0.2873(14) | 0.9373(12) | 1.0409(7)   | 4.9(2)          |
| C(31) | 1.4825(14) | 0.3927(11) | 0.6462(6)   | 3.2(2)          |
| C(32) | 0.2317(13) | 1.1306(9)  | 0.7857(6)   | 5.0(2)          |
| C(33) | 1.2962(13) | 0.5346(10) | 1.1636(6)   | 2.9(2)          |
| C(34) | 1.7401(13) | 0.3731(12) | 0.7722(6)   | 4.5(2)          |
| C(35) | 1.0881(14) | 0.4999(10) | 0.5623(5)   | 4.8(2)          |
| C(36) | 1.3263(15) | 0.4305(10) | 1.0168(6)   | 4.1(2)          |
| C(37) | 0.8432(13) | 0.9117(10) | 1.2920(6)   | 4.2(2)          |

Table 1. Atomic coordinates and B<sub>iso</sub>/B<sub>eq</sub> (continued)

| atom  | x          | y          | z         | B <sub>eq</sub> |
|-------|------------|------------|-----------|-----------------|
| C(38) | 0.5266(13) | 0.9574(10) | 0.7616(6) | 3.0(2)          |
| C(39) | 1.1580(16) | 0.3496(11) | 0.5360(7) | 7.0(3)          |
| C(40) | 0.4698(14) | 0.8692(11) | 1.0800(7) | 3.5(2)          |
| C(41) | 1.6352(14) | 0.4818(9)  | 0.8230(6) | 3.9(2)          |
| C(42) | 0.4588(15) | 1.0219(10) | 1.2149(6) | 4.0(2)          |
| C(43) | 1.3960(16) | 0.3452(12) | 0.5499(6) | 5.8(2)          |
| C(44) | 1.6940(14) | 0.2662(9)  | 1.0779(5) | 4.7(2)          |
| C(45) | 0.2655(12) | 1.0789(11) | 1.1785(7) | 4.5(2)          |
| C(46) | 0.5377(15) | 1.0667(10) | 1.3107(6) | 4.5(2)          |
| C(47) | 0.5933(13) | 0.9757(11) | 0.8541(6) | 4.0(2)          |
| C(48) | 0.7769(12) | 1.0627(8)  | 1.3254(5) | 3.5(2)          |
| C(49) | 1.1857(14) | 0.5491(10) | 0.6609(6) | 3.2(2)          |
| C(50) | 0.8726(14) | 0.8165(11) | 0.8226(7) | 5.0(2)          |
| C(51) | 1.7445(13) | 0.5276(11) | 1.3655(5) | 6.7(2)          |
| C(52) | 0.7742(16) | 0.9075(10) | 0.8784(5) | 4.2(2)          |
| H(1)  | 0.8691     | 0.6930     | 0.6175    | 3.95            |
| H(2)  | 1.0773     | 0.7203     | 1.2495    | 4.79            |
| H(3)  | 1.3877     | 0.6001     | 0.8219    | 4.60            |
| H(4)  | 1.0981     | 0.4818     | 0.9173    | 6.17            |
| H(5)  | 0.9214     | 0.6368     | 1.0155    | 3.63            |
| H(6)  | 1.7153     | 0.2591     | 0.6508    | 5.33            |
| H(7)  | 0.0788     | 1.0820     | 1.0619    | 6.70            |
| H(8)  | 0.2250     | 0.8942     | 0.9843    | 5.84            |
| H(9)  | 1.8722     | 0.3394     | 0.7945    | 5.35            |
| H(10) | 1.4136     | 0.3788     | 0.9788    | 4.86            |
| H(11) | 0.5461     | 0.8025     | 1.0459    | 4.31            |
| H(12) | 1.6887     | 0.4989     | 0.8844    | 4.62            |
| H(13) | 0.1843     | 1.1440     | 1.2113    | 5.42            |
| H(14) | 0.5316     | 1.0396     | 0.8957    | 4.78            |
| H(15) | 0.9926     | 0.7713     | 0.8479    | 5.90            |
| H(16) | 0.8147     | 0.9132     | 0.9411    | 4.85            |
| H(17) | 1.1507     | 0.5613     | 0.5230    | 5.48            |
| H(18) | 0.9382     | 0.5051     | 0.5552    | 5.46            |
| H(19) | 0.8162     | 0.8422     | 1.3335    | 5.20            |
| H(20) | 0.9917     | 0.9233     | 1.2878    | 5.18            |
| H(21) | 1.1134     | 0.2908     | 0.5806    | 8.19            |
| H(22) | 1.0939     | 0.3108     | 0.4787    | 8.19            |

Table 1. Atomic coordinates and  $B_{iso}/B_{eq}$  (continued)

| atom  | x      | y      | z      | $B_{eq}$ |
|-------|--------|--------|--------|----------|
| H(23) | 1.4454 | 0.4193 | 0.5153 | 6.79     |
| H(24) | 1.4459 | 0.2547 | 0.5290 | 6.77     |
| H(25) | 0.5129 | 1.1671 | 1.3197 | 5.68     |
| H(26) | 0.4672 | 1.0145 | 1.3523 | 5.69     |
| H(27) | 0.8099 | 1.0744 | 1.3886 | 4.24     |
| H(28) | 0.8506 | 1.1377 | 1.2989 | 4.25     |
| H(29) | 0.2000 | 0.9886 | 0.4798 | 3.89     |
| H(30) | 0.0518 | 0.8560 | 0.4959 | 3.90     |
| H(31) | 0.2687 | 0.8318 | 0.4590 | 3.90     |
| H(32) | 0.2800 | 1.2279 | 0.7789 | 5.73     |
| H(33) | 0.2556 | 1.1120 | 0.8470 | 5.72     |
| H(34) | 0.0842 | 1.1172 | 0.7667 | 5.73     |
| H(35) | 1.7959 | 0.3089 | 1.0438 | 6.09     |
| H(36) | 1.5772 | 0.2229 | 1.0386 | 6.10     |
| H(37) | 1.7572 | 0.1938 | 1.1111 | 6.10     |
| H(38) | 1.7884 | 0.6263 | 1.3841 | 8.06     |
| H(39) | 1.8659 | 0.4732 | 1.3588 | 8.06     |
| H(40) | 1.6646 | 0.4884 | 1.4093 | 8.06     |

$$B_{eq} = 8/3 \pi^2 (U_{11}(aa^*)^2 + U_{22}(bb^*)^2 + U_{33}(cc^*)^2 + 2U_{12}(aa^*bb^*)\cos \gamma + 2U_{13}(aa^*cc^*)\cos \beta + 2U_{23}(bb^*cc^*)\cos \alpha)$$



Table 2. Anisotropic displacement parameters

| atom  | U <sub>11</sub> | U <sub>22</sub> | U <sub>33</sub> | U <sub>12</sub> | U <sub>13</sub> | U <sub>23</sub> |
|-------|-----------------|-----------------|-----------------|-----------------|-----------------|-----------------|
| S(1)  | 0.0432(14)      | 0.065(2)        | 0.0428(14)      | 0.0164(13)      | 0.0008(11)      | 0.0023(14)      |
| S(2)  | 0.0427(14)      | 0.0536(19)      | 0.0454(15)      | 0.0181(12)      | 0.0048(11)      | 0.0060(14)      |
| O(1)  | 0.046(3)        | 0.069(4)        | 0.055(4)        | 0.013(3)        | 0.009(3)        | 0.007(3)        |
| O(2)  | 0.084(4)        | 0.094(6)        | 0.040(3)        | 0.056(4)        | -0.006(3)       | -0.016(4)       |
| O(3)  | 0.060(4)        | 0.077(5)        | 0.076(4)        | -0.003(3)       | 0.020(3)        | 0.054(4)        |
| O(5)  | 0.058(3)        | 0.040(4)        | 0.060(4)        | 0.023(3)        | -0.010(3)       | -0.017(3)       |
| N(1)  | 0.052(5)        | 0.046(6)        | 0.064(5)        | 0.031(4)        | 0.014(4)        | -0.009(4)       |
| N(2)  | 0.039(3)        | 0.071(6)        | 0.059(4)        | 0.006(3)        | -0.007(3)       | 0.007(4)        |
| N(3)  | 0.053(4)        | 0.040(5)        | 0.059(4)        | 0.029(3)        | -0.007(3)       | -0.009(4)       |
| N(4)  | 0.039(3)        | 0.053(5)        | 0.040(4)        | -0.002(3)       | 0.002(3)        | 0.011(4)        |
| N(5)  | 0.034(3)        | 0.061(5)        | 0.029(4)        | 0.008(3)        | -0.003(3)       | 0.006(4)        |
| N(8)  | 0.032(3)        | 0.045(4)        | 0.029(3)        | 0.020(2)        | 0.005(2)        | -0.001(3)       |
| N(10) | 0.044(4)        | 0.043(5)        | 0.045(4)        | 0.005(3)        | 0.002(3)        | 0.010(4)        |
| N(13) | 0.030(4)        | 0.055(6)        | 0.061(5)        | 0.016(3)        | -0.001(3)       | -0.000(4)       |
| C(1)  | 0.030(4)        | 0.046(7)        | 0.053(6)        | 0.004(4)        | -0.010(4)       | 0.001(5)        |
| C(2)  | 0.039(5)        | 0.052(6)        | 0.030(3)        | 0.010(4)        | -0.007(3)       | -0.009(3)       |
| C(3)  | 0.054(5)        | 0.041(6)        | 0.052(5)        | 0.010(4)        | -0.000(4)       | 0.001(4)        |
| C(16) | 0.025(4)        | 0.029(4)        | 0.077(6)        | 0.017(3)        | 0.008(4)        | 0.011(4)        |
| C(18) | 0.037(4)        | 0.104(8)        | 0.054(6)        | 0.013(4)        | 0.003(4)        | -0.010(5)       |
| C(19) | 0.069(6)        | 0.034(5)        | 0.033(5)        | 0.002(4)        | 0.020(4)        | -0.002(4)       |
| C(20) | 0.043(4)        | 0.049(6)        | 0.023(4)        | 0.004(3)        | -0.006(3)       | -0.001(4)       |
| C(21) | 0.028(3)        | 0.044(5)        | 0.051(4)        | 0.009(3)        | 0.010(3)        | -0.026(3)       |
| C(23) | 0.033(4)        | 0.049(6)        | 0.054(5)        | -0.004(3)       | 0.004(3)        | 0.012(4)        |
| C(24) | 0.065(6)        | 0.039(6)        | 0.065(5)        | 0.011(4)        | 0.026(4)        | -0.005(4)       |
| C(25) | 0.029(5)        | 0.051(6)        | 0.062(5)        | 0.009(4)        | 0.001(4)        | 0.024(5)        |
| C(26) | 0.029(4)        | 0.040(6)        | 0.064(5)        | 0.009(4)        | 0.002(3)        | 0.007(4)        |
| C(27) | 0.047(4)        | 0.022(5)        | 0.030(5)        | 0.005(3)        | 0.009(4)        | -0.008(4)       |
| C(28) | 0.052(5)        | 0.053(7)        | 0.021(4)        | -0.018(4)       | -0.005(3)       | -0.007(4)       |
| C(29) | 0.043(6)        | 0.034(6)        | 0.135(9)        | 0.012(4)        | -0.005(6)       | 0.019(6)        |
| C(30) | 0.053(5)        | 0.080(8)        | 0.052(6)        | 0.024(5)        | -0.005(4)       | 0.003(6)        |
| C(31) | 0.040(4)        | 0.054(7)        | 0.033(6)        | 0.017(4)        | 0.016(4)        | -0.002(5)       |
| C(32) | 0.041(5)        | 0.044(5)        | 0.097(7)        | -0.003(3)       | 0.007(5)        | -0.033(5)       |
| C(33) | 0.033(4)        | 0.024(6)        | 0.053(5)        | 0.007(3)        | 0.011(3)        | 0.007(4)        |
| C(34) | 0.034(4)        | 0.093(8)        | 0.042(6)        | 0.016(4)        | -0.003(4)       | -0.002(5)       |
| C(35) | 0.074(6)        | 0.064(6)        | 0.035(4)        | 0.003(4)        | -0.020(3)       | -0.020(4)       |
| C(36) | 0.059(6)        | 0.047(5)        | 0.049(5)        | 0.012(4)        | 0.021(4)        | -0.016(4)       |
| C(37) | 0.042(5)        | 0.051(6)        | 0.071(6)        | 0.026(4)        | 0.007(4)        | 0.025(5)        |

Table 2. Anisotropic displacement parameters (continued)

| atom  | U <sub>11</sub> | U <sub>22</sub> | U <sub>33</sub> | U <sub>12</sub> | U <sub>13</sub> | U <sub>23</sub> |
|-------|-----------------|-----------------|-----------------|-----------------|-----------------|-----------------|
| C(38) | 0.043(5)        | 0.038(6)        | 0.031(4)        | 0.014(4)        | -0.001(3)       | -0.009(4)       |
| C(39) | 0.103(8)        | 0.104(9)        | 0.053(6)        | 0.050(6)        | -0.014(5)       | -0.025(6)       |
| C(40) | 0.026(4)        | 0.052(7)        | 0.059(6)        | 0.010(4)        | 0.003(4)        | 0.011(5)        |
| C(41) | 0.044(5)        | 0.036(5)        | 0.066(5)        | -0.000(4)       | -0.004(4)       | -0.003(4)       |
| C(42) | 0.049(4)        | 0.035(6)        | 0.066(5)        | -0.005(4)       | -0.001(4)       | 0.015(4)        |
| C(43) | 0.071(7)        | 0.091(9)        | 0.053(6)        | 0.010(6)        | -0.001(5)       | -0.026(6)       |
| C(44) | 0.073(5)        | 0.071(6)        | 0.049(5)        | 0.045(4)        | 0.029(4)        | 0.030(4)        |
| C(45) | 0.025(3)        | 0.070(7)        | 0.077(6)        | 0.020(4)        | -0.002(3)       | 0.009(5)        |
| C(46) | 0.060(6)        | 0.056(7)        | 0.064(7)        | 0.032(5)        | 0.030(5)        | 0.023(5)        |
| C(47) | 0.042(4)        | 0.071(7)        | 0.038(4)        | 0.007(4)        | 0.002(3)        | 0.002(4)        |
| C(48) | 0.049(5)        | 0.035(4)        | 0.051(5)        | -0.006(3)       | 0.008(4)        | 0.007(4)        |
| C(49) | 0.053(4)        | 0.035(5)        | 0.037(5)        | 0.010(3)        | 0.010(3)        | 0.012(4)        |
| C(50) | 0.046(4)        | 0.059(7)        | 0.082(6)        | 0.016(4)        | -0.010(4)       | 0.000(5)        |
| C(51) | 0.070(5)        | 0.135(9)        | 0.050(4)        | 0.011(5)        | -0.028(4)       | 0.045(5)        |
| C(52) | 0.083(7)        | 0.036(6)        | 0.035(4)        | 0.006(5)        | -0.014(4)       | -0.001(4)       |

The general temperature factor expression:  $\exp(-2\pi^2(a^2U_{11}h^2 + b^2U_{22}k^2 + c^2U_{33}l^2 + 2a*b*U_{12}hk + 2a*c*U_{13}hl + 2b*c*U_{23}kl))$

Table 3. Bond lengths (Å)

| atom  | atom  | distance  | atom  | atom  | distance  |
|-------|-------|-----------|-------|-------|-----------|
| S(1)  | O(2)  | 1.486(7)  | S(1)  | O(3)  | 1.425(8)  |
| S(1)  | N(8)  | 1.596(7)  | S(1)  | C(2)  | 1.787(9)  |
| S(2)  | O(1)  | 1.446(7)  | S(2)  | O(5)  | 1.403(7)  |
| S(2)  | N(2)  | 1.728(7)  | S(2)  | C(33) | 1.696(9)  |
| N(1)  | N(2)  | 1.424(11) | N(1)  | C(26) | 1.206(12) |
| N(2)  | C(51) | 1.459(10) | N(3)  | N(13) | 1.397(11) |
| N(3)  | C(16) | 1.412(11) | N(3)  | H(2)  | 0.950     |
| N(4)  | N(8)  | 1.380(10) | N(4)  | C(19) | 1.358(11) |
| N(5)  | N(10) | 1.357(10) | N(5)  | C(28) | 1.357(12) |
| N(5)  | H(1)  | 0.950     | N(8)  | C(21) | 1.497(9)  |
| N(10) | C(49) | 1.304(12) | N(13) | C(1)  | 1.279(13) |
| C(1)  | C(25) | 1.530(13) | C(1)  | C(37) | 1.424(12) |
| C(2)  | C(28) | 1.336(13) | C(2)  | C(38) | 1.417(13) |
| C(3)  | C(27) | 1.423(12) | C(3)  | C(41) | 1.311(13) |
| C(3)  | H(3)  | 0.950     | C(16) | C(20) | 1.394(11) |
| C(16) | C(33) | 1.473(11) | C(18) | C(20) | 1.385(13) |
| C(18) | C(36) | 1.409(13) | C(18) | H(4)  | 0.950     |
| C(19) | C(32) | 1.485(13) | C(19) | C(38) | 1.450(13) |
| C(20) | H(5)  | 0.950     | C(21) | H(29) | 0.950     |
| C(21) | H(30) | 0.950     | C(21) | H(31) | 0.950     |
| C(23) | C(26) | 1.470(13) | C(23) | C(33) | 1.389(13) |
| C(23) | C(36) | 1.380(13) | C(24) | C(31) | 1.354(13) |
| C(24) | C(34) | 1.373(13) | C(24) | H(6)  | 0.950     |
| C(25) | C(40) | 1.358(13) | C(25) | C(42) | 1.400(14) |
| C(26) | C(44) | 1.536(13) | C(27) | C(31) | 1.390(13) |
| C(27) | C(49) | 1.421(12) | C(28) | C(50) | 1.392(13) |
| C(29) | C(30) | 1.326(15) | C(29) | C(45) | 1.380(15) |
| C(29) | H(7)  | 0.950     | C(30) | C(40) | 1.445(13) |
| C(30) | H(8)  | 0.950     | C(31) | C(43) | 1.519(13) |
| C(32) | H(32) | 0.950     | C(32) | H(33) | 0.950     |
| C(32) | H(34) | 0.950     | C(34) | C(41) | 1.441(13) |
| C(34) | H(9)  | 0.950     | C(35) | C(39) | 1.513(14) |
| C(35) | C(49) | 1.571(11) | C(35) | H(17) | 0.950     |
| C(35) | H(18) | 0.950     | C(36) | H(10) | 0.950     |
| C(37) | C(48) | 1.537(11) | C(37) | H(19) | 0.950     |
| C(37) | H(20) | 0.950     | C(38) | C(47) | 1.408(12) |
| C(39) | C(43) | 1.506(14) | C(39) | H(21) | 0.950     |

Table 3. Bond lengths (Å) (continued)

| atom  | atom  | distance  | atom  | atom  | distance  |
|-------|-------|-----------|-------|-------|-----------|
| C(39) | H(22) | 0.950     | C(40) | H(11) | 0.950     |
| C(41) | H(12) | 0.950     | C(42) | C(45) | 1.438(13) |
| C(42) | C(46) | 1.496(13) | C(43) | H(23) | 0.950     |
| C(43) | H(24) | 0.950     | C(44) | H(35) | 0.950     |
| C(44) | H(36) | 0.950     | C(44) | H(37) | 0.950     |
| C(45) | H(13) | 0.950     | C(46) | C(48) | 1.514(12) |
| C(46) | H(25) | 0.950     | C(46) | H(26) | 0.950     |
| C(47) | C(52) | 1.372(13) | C(47) | H(14) | 0.950     |
| C(48) | H(27) | 0.950     | C(48) | H(28) | 0.950     |
| C(50) | C(52) | 1.356(14) | C(50) | H(15) | 0.950     |
| C(51) | H(38) | 0.950     | C(51) | H(39) | 0.950     |
| C(51) | H(40) | 0.950     | C(52) | H(16) | 0.950     |

Table 4. Bond angles (°)

| atom  | atom  | atom  | angle    | atom  | atom  | atom  | angle    |
|-------|-------|-------|----------|-------|-------|-------|----------|
| O(2)  | S(1)  | O(3)  | 118.1(4) | O(2)  | S(1)  | N(8)  | 108.2(4) |
| O(2)  | S(1)  | C(2)  | 109.3(4) | O(3)  | S(1)  | N(8)  | 110.7(4) |
| O(3)  | S(1)  | C(2)  | 109.6(4) | N(8)  | S(1)  | C(2)  | 99.3(4)  |
| O(1)  | S(2)  | O(5)  | 115.6(4) | O(1)  | S(2)  | N(2)  | 112.2(4) |
| O(1)  | S(2)  | C(33) | 109.9(4) | O(5)  | S(2)  | N(2)  | 105.7(4) |
| O(5)  | S(2)  | C(33) | 112.8(4) | N(2)  | S(2)  | C(33) | 99.2(4)  |
| N(2)  | N(1)  | C(26) | 122.7(8) | S(2)  | N(2)  | N(1)  | 114.3(5) |
| S(2)  | N(2)  | C(51) | 113.1(6) | N(1)  | N(2)  | C(51) | 115.9(7) |
| N(13) | N(3)  | C(16) | 112.4(7) | N(13) | N(3)  | H(2)  | 125.7    |
| C(16) | N(3)  | H(2)  | 121.9    | N(8)  | N(4)  | C(19) | 115.7(7) |
| N(10) | N(5)  | C(28) | 123.8(7) | N(10) | N(5)  | H(1)  | 119.5    |
| C(28) | N(5)  | H(1)  | 116.6    | S(1)  | N(8)  | N(4)  | 123.7(5) |
| S(1)  | N(8)  | C(21) | 115.1(5) | N(4)  | N(8)  | C(21) | 106.7(6) |
| N(5)  | N(10) | C(49) | 121.8(7) | N(3)  | N(13) | C(1)  | 112.9(7) |
| N(13) | C(1)  | C(25) | 113.6(8) | N(13) | C(1)  | C(37) | 129.3(8) |
| C(25) | C(1)  | C(37) | 117.1(8) | S(1)  | C(2)  | C(28) | 119.6(7) |
| S(1)  | C(2)  | C(38) | 116.2(6) | C(28) | C(2)  | C(38) | 123.9(8) |
| C(27) | C(3)  | C(41) | 122.6(9) | C(27) | C(3)  | H(3)  | 117.9    |
| C(41) | C(3)  | H(3)  | 119.2    | N(3)  | C(16) | C(20) | 124.2(7) |
| N(3)  | C(16) | C(33) | 115.5(7) | C(20) | C(16) | C(33) | 120.3(7) |
| C(20) | C(18) | C(36) | 117.9(8) | C(20) | C(18) | H(4)  | 118.8    |
| C(36) | C(18) | H(4)  | 122.6    | N(4)  | C(19) | C(32) | 113.0(8) |
| N(4)  | C(19) | C(38) | 125.7(8) | C(32) | C(19) | C(38) | 121.2(8) |
| C(16) | C(20) | C(18) | 119.8(8) | C(16) | C(20) | H(5)  | 116.5    |
| C(18) | C(20) | H(5)  | 123.4    | N(8)  | C(21) | H(29) | 108.2    |
| N(8)  | C(21) | H(30) | 114.8    | N(8)  | C(21) | H(31) | 105.2    |
| H(29) | C(21) | H(30) | 109.5    | H(29) | C(21) | H(31) | 109.5    |
| H(30) | C(21) | H(31) | 109.5    | C(26) | C(23) | C(33) | 120.4(8) |
| C(26) | C(23) | C(36) | 122.3(8) | C(33) | C(23) | C(36) | 117.2(8) |
| C(31) | C(24) | C(34) | 123.7(9) | C(31) | C(24) | H(6)  | 116.8    |
| C(34) | C(24) | H(6)  | 119.5    | C(1)  | C(25) | C(40) | 120.6(9) |
| C(1)  | C(25) | C(42) | 119.6(8) | C(40) | C(25) | C(42) | 119.4(8) |
| N(1)  | C(26) | C(23) | 125.3(9) | N(1)  | C(26) | C(44) | 115.8(8) |
| C(23) | C(26) | C(44) | 118.8(7) | C(3)  | C(27) | C(31) | 117.8(8) |
| C(3)  | C(27) | C(49) | 120.8(8) | C(31) | C(27) | C(49) | 121.1(8) |
| N(5)  | C(28) | C(2)  | 126.5(8) | N(5)  | C(28) | C(50) | 117.7(8) |
| C(2)  | C(28) | C(50) | 115.7(8) | C(30) | C(29) | C(45) | 122.7(9) |

Table 4. Bond angles ( $^{\circ}$ ) (continued)

| atom  | atom  | atom  | angle    | atom  | atom  | atom  | angle    |
|-------|-------|-------|----------|-------|-------|-------|----------|
| C(30) | C(29) | H(7)  | 117.7    | C(45) | C(29) | H(7)  | 119.3    |
| C(29) | C(30) | C(40) | 119.8(9) | C(29) | C(30) | H(8)  | 122.8    |
| C(40) | C(30) | H(8)  | 116.1    | C(24) | C(31) | C(27) | 118.6(9) |
| C(24) | C(31) | C(43) | 121.3(9) | C(27) | C(31) | C(43) | 119.6(8) |
| C(19) | C(32) | H(32) | 111.3    | C(19) | C(32) | H(33) | 111.0    |
| C(19) | C(32) | H(34) | 106.1    | H(32) | C(32) | H(33) | 109.5    |
| H(32) | C(32) | H(34) | 109.5    | H(33) | C(32) | H(34) | 109.5    |
| S(2)  | C(33) | C(16) | 122.4(6) | S(2)  | C(33) | C(23) | 117.6(7) |
| C(16) | C(33) | C(23) | 119.3(8) | C(24) | C(34) | C(41) | 116.9(8) |
| C(24) | C(34) | H(9)  | 121.1    | C(41) | C(34) | H(9)  | 121.6    |
| C(39) | C(35) | C(49) | 108.7(7) | C(39) | C(35) | H(17) | 104.9    |
| C(39) | C(35) | H(18) | 112.9    | C(49) | C(35) | H(17) | 108.3    |
| C(49) | C(35) | H(18) | 112.2    | H(17) | C(35) | H(18) | 109.5    |
| C(18) | C(36) | C(23) | 125.3(9) | C(18) | C(36) | H(10) | 119.6    |
| C(23) | C(36) | H(10) | 114.5    | C(1)  | C(37) | C(48) | 117.6(8) |
| C(1)  | C(37) | H(19) | 109.2    | C(1)  | C(37) | H(20) | 103.5    |
| C(48) | C(37) | H(19) | 111.0    | C(48) | C(37) | H(20) | 105.5    |
| H(19) | C(37) | H(20) | 109.5    | C(2)  | C(38) | C(19) | 120.9(8) |
| C(2)  | C(38) | C(47) | 119.8(8) | C(19) | C(38) | C(47) | 119.3(8) |
| C(35) | C(39) | C(43) | 111.3(8) | C(35) | C(39) | H(21) | 105.2    |
| C(35) | C(39) | H(22) | 112.4    | C(43) | C(39) | H(21) | 102.1    |
| C(43) | C(39) | H(22) | 115.4    | H(21) | C(39) | H(22) | 109.5    |
| C(25) | C(40) | C(30) | 119.9(9) | C(25) | C(40) | H(11) | 117.4    |
| C(30) | C(40) | H(11) | 122.3    | C(3)  | C(41) | C(34) | 119.5(8) |
| C(3)  | C(41) | H(12) | 124.5    | C(34) | C(41) | H(12) | 114.8    |
| C(25) | C(42) | C(45) | 120.0(8) | C(25) | C(42) | C(46) | 121.1(8) |
| C(45) | C(42) | C(46) | 118.2(8) | C(31) | C(43) | C(39) | 112.0(8) |
| C(31) | C(43) | H(23) | 105.6    | C(31) | C(43) | H(24) | 112.3    |
| C(39) | C(43) | H(23) | 103.5    | C(39) | C(43) | H(24) | 113.3    |
| H(23) | C(43) | H(24) | 109.5    | C(26) | C(44) | H(35) | 113.1    |
| C(26) | C(44) | H(36) | 104.6    | C(26) | C(44) | H(37) | 110.6    |
| H(35) | C(44) | H(36) | 109.5    | H(35) | C(44) | H(37) | 109.5    |
| H(36) | C(44) | H(37) | 109.5    | C(29) | C(45) | C(42) | 117.6(9) |
| C(29) | C(45) | H(13) | 118.1    | C(42) | C(45) | H(13) | 124.2    |
| C(42) | C(46) | C(48) | 110.9(8) | C(42) | C(46) | H(25) | 105.5    |
| C(42) | C(46) | H(26) | 113.5    | C(48) | C(46) | H(25) | 104.2    |
| C(48) | C(46) | H(26) | 112.6    | H(25) | C(46) | H(26) | 109.5    |

Table 4. Bond angles ( $^{\circ}$ ) (continued)

| atom  | atom  | atom  | angle    | atom  | atom  | atom  | angle    |
|-------|-------|-------|----------|-------|-------|-------|----------|
| C(38) | C(47) | C(52) | 114.1(8) | C(38) | C(47) | H(14) | 123.8    |
| C(52) | C(47) | H(14) | 121.5    | C(37) | C(48) | C(46) | 109.6(6) |
| C(37) | C(48) | H(27) | 107.6    | C(37) | C(48) | H(28) | 111.3    |
| C(46) | C(48) | H(27) | 105.1    | C(46) | C(48) | H(28) | 113.4    |
| H(27) | C(48) | H(28) | 109.5    | N(10) | C(49) | C(27) | 118.5(8) |
| N(10) | C(49) | C(35) | 120.8(8) | C(27) | C(49) | C(35) | 120.6(8) |
| C(28) | C(50) | C(52) | 121.0(9) | C(28) | C(50) | H(15) | 121.4    |
| C(52) | C(50) | H(15) | 117.2    | N(2)  | C(51) | H(38) | 108.8    |
| N(2)  | C(51) | H(39) | 104.6    | N(2)  | C(51) | H(40) | 114.8    |
| H(38) | C(51) | H(39) | 109.5    | H(38) | C(51) | H(40) | 109.5    |
| H(39) | C(51) | H(40) | 109.5    | C(47) | C(52) | C(50) | 124.9(8) |
| C(47) | C(52) | H(16) | 114.8    | C(50) | C(52) | H(16) | 119.4    |

Table 5. Torsion Angles( $^{\circ}$ )

| atom1 | atom2 | atom3 | atom4 | angle     | atom1 | atom2 | atom3 | atom4 | angle     |
|-------|-------|-------|-------|-----------|-------|-------|-------|-------|-----------|
| O(2)  | S(1)  | N(8)  | N(4)  | 164.5(7)  | O(2)  | S(1)  | N(8)  | C(21) | -61.6(6)  |
| O(2)  | S(1)  | C(2)  | C(28) | 40.3(9)   | O(2)  | S(1)  | C(2)  | C(38) | -146.1(7) |
| O(3)  | S(1)  | N(8)  | N(4)  | -64.7(8)  | O(3)  | S(1)  | N(8)  | C(21) | 69.2(6)   |
| O(3)  | S(1)  | C(2)  | C(28) | -90.5(8)  | O(3)  | S(1)  | C(2)  | C(38) | 83.1(7)   |
| N(8)  | S(1)  | C(2)  | C(28) | 153.4(8)  | N(8)  | S(1)  | C(2)  | C(38) | -33.0(8)  |
| C(2)  | S(1)  | N(8)  | N(4)  | 50.5(8)   | C(2)  | S(1)  | N(8)  | C(21) | -175.6(6) |
| O(1)  | S(2)  | N(2)  | N(1)  | 67.0(7)   | O(1)  | S(2)  | N(2)  | C(51) | -68.5(7)  |
| O(1)  | S(2)  | C(33) | C(16) | 91.1(8)   | O(1)  | S(2)  | C(33) | C(23) | -79.6(7)  |
| O(5)  | S(2)  | N(2)  | N(1)  | -166.0(6) | O(5)  | S(2)  | N(2)  | C(51) | 58.5(7)   |
| O(5)  | S(2)  | C(33) | C(16) | -39.6(8)  | O(5)  | S(2)  | C(33) | C(23) | 149.7(7)  |
| N(2)  | S(2)  | C(33) | C(16) | -151.1(7) | N(2)  | S(2)  | C(33) | C(23) | 38.2(8)   |
| C(33) | S(2)  | N(2)  | N(1)  | -49.0(7)  | C(33) | S(2)  | N(2)  | C(51) | 175.5(7)  |
| N(2)  | N(1)  | C(26) | C(23) | -1.4(16)  | N(2)  | N(1)  | C(26) | C(44) | 174.2(8)  |
| C(26) | N(1)  | N(2)  | S(2)  | 35.6(12)  | C(26) | N(1)  | N(2)  | C(51) | 169.8(9)  |
| N(13) | N(3)  | C(16) | C(20) | 5.0(12)   | N(13) | N(3)  | C(16) | C(33) | -175.0(7) |
| C(16) | N(3)  | N(13) | C(1)  | -173.9(8) | N(8)  | N(4)  | C(19) | C(32) | -176.1(7) |
| N(8)  | N(4)  | C(19) | C(38) | 2.8(13)   | C(19) | N(4)  | N(8)  | S(1)  | -39.1(10) |
| C(19) | N(4)  | N(8)  | C(21) | -176.1(7) | N(10) | N(5)  | C(28) | C(2)  | 177.9(9)  |
| N(10) | N(5)  | C(28) | C(50) | -6.2(13)  | C(28) | N(5)  | N(10) | C(49) | 170.2(9)  |
| N(5)  | N(10) | C(49) | C(27) | 179.9(6)  | N(5)  | N(10) | C(49) | C(35) | 0.8(13)   |
| N(3)  | N(13) | C(1)  | C(25) | -177.2(8) | N(3)  | N(13) | C(1)  | C(37) | 3.6(15)   |
| N(13) | C(1)  | C(25) | C(40) | -3.5(14)  | N(13) | C(1)  | C(25) | C(42) | -176.8(9) |
| N(13) | C(1)  | C(37) | C(48) | 155.7(10) | C(25) | C(1)  | C(37) | C(48) | -23.5(12) |
| C(37) | C(1)  | C(25) | C(40) | 175.8(9)  | C(37) | C(1)  | C(25) | C(42) | 2.6(14)   |
| S(1)  | C(2)  | C(28) | N(5)  | -10.3(14) | S(1)  | C(2)  | C(28) | C(50) | 173.7(7)  |
| S(1)  | C(2)  | C(38) | C(19) | 9.4(12)   | S(1)  | C(2)  | C(38) | C(47) | -171.4(7) |
| C(28) | C(2)  | C(38) | C(19) | -177.3(9) | C(28) | C(2)  | C(38) | C(47) | 1.9(14)   |
| C(38) | C(2)  | C(28) | N(5)  | 176.6(9)  | C(38) | C(2)  | C(28) | C(50) | 0.6(13)   |
| C(27) | C(3)  | C(41) | C(34) | -5.9(15)  | C(41) | C(3)  | C(27) | C(31) | -0.3(11)  |
| C(41) | C(3)  | C(27) | C(49) | -174.9(9) | N(3)  | C(16) | C(20) | C(18) | 174.6(8)  |
| N(3)  | C(16) | C(33) | S(2)  | 11.9(11)  | N(3)  | C(16) | C(33) | C(23) | -177.6(8) |
| C(20) | C(16) | C(33) | S(2)  | -168.2(7) | C(20) | C(16) | C(33) | C(23) | 2.4(12)   |
| C(33) | C(16) | C(20) | C(18) | -5.4(13)  | C(20) | C(18) | C(36) | C(23) | -4.5(15)  |
| C(36) | C(18) | C(20) | C(16) | 6.2(13)   | N(4)  | C(19) | C(38) | C(2)  | 9.7(15)   |
| N(4)  | C(19) | C(38) | C(47) | -169.5(9) | C(32) | C(19) | C(38) | C(2)  | -171.5(8) |
| C(32) | C(19) | C(38) | C(47) | 9.3(14)   | C(26) | C(23) | C(33) | S(2)  | -13.2(12) |
| C(26) | C(23) | C(33) | C(16) | 175.8(8)  | C(33) | C(23) | C(26) | N(1)  | -11.5(15) |



Table 5. Torsion angles ( $^{\circ}$ ) (continued)

| atom1 | atom2 | atom3 | atom4 | angle     | atom1 | atom2 | atom3 | atom4 | angle     |
|-------|-------|-------|-------|-----------|-------|-------|-------|-------|-----------|
| C(33) | C(23) | C(26) | C(44) | 173.0(8)  | C(26) | C(23) | C(36) | C(18) | -174.6(9) |
| C(36) | C(23) | C(26) | N(1)  | 164.6(10) | C(36) | C(23) | C(26) | C(44) | -10.9(14) |
| C(33) | C(23) | C(36) | C(18) | 1.6(14)   | C(36) | C(23) | C(33) | S(2)  | 170.5(7)  |
| C(36) | C(23) | C(33) | C(16) | -0.5(11)  | C(31) | C(24) | C(34) | C(41) | 3.6(15)   |
| C(34) | C(24) | C(31) | C(27) | -9.8(15)  | C(34) | C(24) | C(31) | C(43) | 178.3(9)  |
| C(1)  | C(25) | C(40) | C(30) | -173.0(9) | C(1)  | C(25) | C(42) | C(45) | 179.1(9)  |
| C(1)  | C(25) | C(42) | C(46) | -9.9(14)  | C(40) | C(25) | C(42) | C(45) | 5.8(15)   |
| C(40) | C(25) | C(42) | C(46) | 176.7(9)  | C(42) | C(25) | C(40) | C(30) | 0.2(11)   |
| C(3)  | C(27) | C(31) | C(24) | 8.0(14)   | C(3)  | C(27) | C(31) | C(43) | -180.0(8) |
| C(3)  | C(27) | C(49) | N(10) | 2.2(14)   | C(3)  | C(27) | C(49) | C(35) | -178.6(8) |
| C(31) | C(27) | C(49) | N(10) | -172.3(9) | C(31) | C(27) | C(49) | C(35) | 6.9(13)   |
| C(49) | C(27) | C(31) | C(24) | -177.3(9) | C(49) | C(27) | C(31) | C(43) | -5.3(14)  |
| N(5)  | C(28) | C(50) | C(52) | 177.4(9)  | C(2)  | C(28) | C(50) | C(52) | -6.3(14)  |
| C(30) | C(29) | C(45) | C(42) | 3.7(15)   | C(45) | C(29) | C(30) | C(40) | 2.3(16)   |
| C(29) | C(30) | C(40) | C(25) | -4.4(15)  | C(24) | C(31) | C(43) | C(39) | 145.3(10) |
| C(27) | C(31) | C(43) | C(39) | -26.5(13) | C(24) | C(34) | C(41) | C(3)  | 4.4(14)   |
| C(39) | C(35) | C(49) | N(10) | -157.9(8) | C(39) | C(35) | C(49) | C(27) | 22.9(11)  |
| C(49) | C(35) | C(39) | C(43) | -53.7(10) | C(1)  | C(37) | C(48) | C(46) | 50.0(10)  |
| C(2)  | C(38) | C(47) | C(52) | 1.0(13)   | C(19) | C(38) | C(47) | C(52) | -179.8(7) |
| C(35) | C(39) | C(43) | C(31) | 57.0(11)  | C(25) | C(42) | C(45) | C(29) | -7.8(14)  |
| C(25) | C(42) | C(46) | C(48) | 36.8(12)  | C(45) | C(42) | C(46) | C(48) | -152.1(8) |
| C(46) | C(42) | C(45) | C(29) | -179.0(9) | C(42) | C(46) | C(48) | C(37) | -54.0(10) |
| C(38) | C(47) | C(52) | C(50) | -6.9(15)  | C(28) | C(50) | C(52) | C(47) | 10.0(16)  |

The sign is positive if when looking from atom 2 to atom 3 a clock-wise motion of atom 1 would superimpose it on atom 4.

Table 6. Distances beyond the asymmetric unit out to 3.60 Å

| atom  | atom                | distance  | atom  | atom                | distance  |
|-------|---------------------|-----------|-------|---------------------|-----------|
| S(1)  | H(30) <sup>1)</sup> | 3.473     | S(2)  | H(39) <sup>2)</sup> | 3.529     |
| O(1)  | C(45) <sup>3)</sup> | 3.467(11) | O(1)  | H(13) <sup>3)</sup> | 2.720     |
| O(1)  | H(17) <sup>4)</sup> | 3.568     | O(1)  | H(22) <sup>4)</sup> | 3.043     |
| O(1)  | H(23) <sup>4)</sup> | 3.214     | O(1)  | H(25) <sup>3)</sup> | 2.810     |
| O(1)  | H(28) <sup>5)</sup> | 3.479     | O(1)  | H(39) <sup>2)</sup> | 2.765     |
| O(2)  | O(5) <sup>6)</sup>  | 3.480(9)  | O(2)  | C(51) <sup>6)</sup> | 3.331(11) |
| O(2)  | H(17) <sup>2)</sup> | 3.138     | O(2)  | H(23) <sup>2)</sup> | 2.977     |
| O(2)  | H(30) <sup>1)</sup> | 3.189     | O(2)  | H(38) <sup>6)</sup> | 2.853     |
| O(2)  | H(40) <sup>6)</sup> | 2.933     | O(3)  | C(24) <sup>7)</sup> | 3.505(12) |
| O(3)  | H(6) <sup>7)</sup>  | 2.664     | O(3)  | H(24) <sup>7)</sup> | 2.829     |
| O(3)  | H(26) <sup>8)</sup> | 3.200     | O(3)  | H(27) <sup>8)</sup> | 2.845     |
| O(3)  | H(30) <sup>1)</sup> | 3.005     | O(5)  | O(2) <sup>9)</sup>  | 3.480(9)  |
| O(5)  | C(21) <sup>9)</sup> | 3.435(9)  | O(5)  | H(17) <sup>4)</sup> | 3.516     |
| O(5)  | H(19) <sup>1)</sup> | 3.349     | O(5)  | H(26) <sup>1)</sup> | 3.256     |
| O(5)  | H(31) <sup>9)</sup> | 2.528     | O(5)  | H(39) <sup>2)</sup> | 3.501     |
| N(1)  | N(3) <sup>1)</sup>  | 3.376(11) | N(1)  | N(13) <sup>1)</sup> | 3.530(12) |
| N(1)  | C(16) <sup>1)</sup> | 3.556(11) | N(1)  | H(25) <sup>3)</sup> | 3.086     |
| N(1)  | H(28) <sup>3)</sup> | 3.081     | N(2)  | N(3) <sup>1)</sup>  | 3.314(11) |
| N(2)  | N(13) <sup>1)</sup> | 3.289(12) | N(2)  | C(1) <sup>1)</sup>  | 3.423(14) |
| N(2)  | H(2) <sup>1)</sup>  | 3.352     | N(2)  | H(19) <sup>1)</sup> | 3.157     |
| N(2)  | H(25) <sup>3)</sup> | 3.439     | N(3)  | N(1) <sup>2)</sup>  | 3.376(11) |
| N(3)  | N(2) <sup>2)</sup>  | 3.314(11) | N(3)  | H(38) <sup>2)</sup> | 3.502     |
| N(4)  | N(5) <sup>2)</sup>  | 3.317(10) | N(4)  | N(10) <sup>2)</sup> | 3.547(11) |
| N(4)  | C(28) <sup>2)</sup> | 3.569(12) | N(4)  | H(1) <sup>2)</sup>  | 3.538     |
| N(4)  | H(21) <sup>7)</sup> | 3.041     | N(4)  | H(24) <sup>7)</sup> | 3.321     |
| N(5)  | N(4) <sup>1)</sup>  | 3.317(10) | N(5)  | N(8) <sup>1)</sup>  | 3.389(10) |
| N(5)  | H(30) <sup>1)</sup> | 3.285     | N(8)  | N(5) <sup>2)</sup>  | 3.389(10) |
| N(8)  | N(10) <sup>2)</sup> | 3.353(11) | N(8)  | C(49) <sup>2)</sup> | 3.548(12) |
| N(8)  | H(1) <sup>2)</sup>  | 3.411     | N(8)  | H(17) <sup>2)</sup> | 3.251     |
| N(8)  | H(24) <sup>7)</sup> | 3.574     | N(10) | N(4) <sup>1)</sup>  | 3.547(11) |
| N(10) | N(8) <sup>1)</sup>  | 3.353(11) | N(10) | C(34) <sup>2)</sup> | 3.573(12) |
| N(10) | H(4)                | 3.594     | N(10) | H(9) <sup>2)</sup>  | 3.521     |
| N(13) | N(1) <sup>2)</sup>  | 3.530(12) | N(13) | N(2) <sup>2)</sup>  | 3.289(12) |
| N(13) | C(29) <sup>1)</sup> | 3.549(13) | N(13) | H(16)               | 3.557     |
| C(1)  | N(2) <sup>2)</sup>  | 3.423(14) | C(1)  | H(37) <sup>7)</sup> | 3.541     |
| C(1)  | H(38) <sup>2)</sup> | 3.554     | C(2)  | H(3) <sup>2)</sup>  | 3.598     |
| C(2)  | H(34) <sup>1)</sup> | 3.509     | C(3)  | C(28) <sup>1)</sup> | 3.514(14) |

Table 6. Distances beyond the asymmetric unit out to 3.60 Å (continued)

| atom  | atom                 | distance  | atom  | atom                 | distance  |
|-------|----------------------|-----------|-------|----------------------|-----------|
| C(3)  | H(4)                 | 3.160     | C(3)  | H(10)                | 3.309     |
| C(3)  | H(32) <sup>3j</sup>  | 2.926     | C(16) | N(1) <sup>2j</sup>   | 3.556(11) |
| C(16) | C(30) <sup>1j</sup>  | 3.555(14) | C(16) | C(40) <sup>1j</sup>  | 3.377(12) |
| C(16) | H(11) <sup>1j</sup>  | 3.562     | C(16) | H(35) <sup>2j</sup>  | 3.404     |
| C(18) | H(3)                 | 3.073     | C(18) | H(9) <sup>2j</sup>   | 3.338     |
| C(18) | H(12) <sup>2j</sup>  | 3.139     | C(18) | H(15)                | 3.435     |
| C(18) | H(35) <sup>2j</sup>  | 3.083     | C(19) | C(24) <sup>7j</sup>  | 3.509(14) |
| C(19) | H(6) <sup>7j</sup>   | 3.480     | C(20) | C(30) <sup>1j</sup>  | 3.524(14) |
| C(20) | H(8) <sup>1j</sup>   | 3.206     | C(20) | H(12) <sup>2j</sup>  | 3.051     |
| C(20) | H(15)                | 3.419     | C(20) | H(35) <sup>2j</sup>  | 2.928     |
| C(21) | O(5) <sup>6j</sup>   | 3.435(9)  | C(21) | H(1) <sup>2j</sup>   | 3.424     |
| C(21) | H(17) <sup>2j</sup>  | 3.113     | C(21) | H(19) <sup>6j</sup>  | 3.267     |
| C(21) | H(20) <sup>6j</sup>  | 3.339     | C(21) | H(24) <sup>7j</sup>  | 3.599     |
| C(21) | H(26) <sup>8j</sup>  | 3.153     | C(21) | H(27) <sup>6j</sup>  | 3.410     |
| C(23) | H(11) <sup>1j</sup>  | 3.585     | C(23) | H(13) <sup>3j</sup>  | 3.586     |
| C(24) | O(3) <sup>3j</sup>   | 3.505(12) | C(24) | C(19) <sup>3j</sup>  | 3.509(14) |
| C(24) | H(18) <sup>1j</sup>  | 3.254     | C(24) | H(21) <sup>1j</sup>  | 3.478     |
| C(24) | H(32) <sup>3j</sup>  | 3.005     | C(25) | H(36) <sup>7j</sup>  | 3.577     |
| C(25) | H(37) <sup>7j</sup>  | 3.050     | C(26) | C(45) <sup>3j</sup>  | 3.491(13) |
| C(26) | H(13) <sup>3j</sup>  | 3.590     | C(26) | H(25) <sup>3j</sup>  | 3.512     |
| C(27) | H(32) <sup>3j</sup>  | 2.823     | C(28) | N(4) <sup>1j</sup>   | 3.569(12) |
| C(28) | C(3) <sup>2j</sup>   | 3.514(14) | C(28) | C(41) <sup>2j</sup>  | 3.546(14) |
| C(28) | H(34) <sup>1j</sup>  | 3.275     | C(29) | N(13) <sup>2j</sup>  | 3.549(13) |
| C(29) | H(16) <sup>2j</sup>  | 3.211     | C(29) | H(20) <sup>2j</sup>  | 3.541     |
| C(29) | H(36) <sup>7j</sup>  | 3.112     | C(29) | H(37) <sup>10j</sup> | 3.225     |
| C(30) | C(16) <sup>2j</sup>  | 3.555(14) | C(30) | C(20) <sup>2j</sup>  | 3.524(14) |
| C(30) | C(47)                | 3.590(14) | C(30) | H(5) <sup>2j</sup>   | 3.491     |
| C(30) | H(14)                | 2.978     | C(30) | H(15) <sup>2j</sup>  | 3.491     |
| C(30) | H(16) <sup>2j</sup>  | 3.207     | C(30) | H(33)                | 3.439     |
| C(30) | H(36) <sup>7j</sup>  | 3.136     | C(31) | H(18) <sup>1j</sup>  | 3.455     |
| C(31) | H(32) <sup>3j</sup>  | 2.951     | C(32) | H(9) <sup>10j</sup>  | 3.069     |
| C(32) | H(21) <sup>7j</sup>  | 3.560     | C(33) | C(40) <sup>1j</sup>  | 3.586(14) |
| C(33) | H(11) <sup>1j</sup>  | 3.546     | C(34) | N(10) <sup>1j</sup>  | 3.573(12) |
| C(34) | H(4) <sup>1j</sup>   | 3.061     | C(34) | H(32) <sup>3j</sup>  | 3.156     |
| C(34) | H(34) <sup>11j</sup> | 3.303     | C(35) | C(51) <sup>6j</sup>  | 3.538(11) |
| C(35) | H(6) <sup>2j</sup>   | 3.578     | C(35) | H(30) <sup>1j</sup>  | 3.527     |
| C(35) | H(38) <sup>6j</sup>  | 3.453     | C(35) | H(39) <sup>6j</sup>  | 3.228     |

Table 6. Distances beyond the asymmetric unit out to 3.60 Å (continued)

| atom  | atom                 | distance  | atom  | atom                | distance  |
|-------|----------------------|-----------|-------|---------------------|-----------|
| C(35) | H(40) <sup>6j</sup>  | 3.356     | C(36) | H(3)                | 3.475     |
| C(36) | H(12)                | 3.246     | C(36) | H(35) <sup>2j</sup> | 3.556     |
| C(37) | H(13) <sup>1j</sup>  | 3.341     | C(37) | H(29) <sup>9j</sup> | 3.445     |
| C(37) | H(30) <sup>9j</sup>  | 3.311     | C(37) | H(38) <sup>2j</sup> | 3.093     |
| C(38) | H(3) <sup>2j</sup>   | 3.579     | C(38) | H(6) <sup>7j</sup>  | 3.569     |
| C(39) | H(6) <sup>2j</sup>   | 3.527     | C(39) | H(29) <sup>3j</sup> | 3.403     |
| C(39) | H(39) <sup>6j</sup>  | 3.407     | C(40) | C(16) <sup>2j</sup> | 3.377(12) |
| C(40) | C(33) <sup>2j</sup>  | 3.586(14) | C(40) | H(14)               | 3.339     |
| C(40) | H(16)                | 3.194     | C(40) | H(36) <sup>7j</sup> | 3.419     |
| C(40) | H(37) <sup>7j</sup>  | 3.397     | C(41) | C(28) <sup>1j</sup> | 3.546(14) |
| C(41) | C(50) <sup>1j</sup>  | 3.364(13) | C(41) | H(4) <sup>1j</sup>  | 3.134     |
| C(41) | H(5) <sup>1j</sup>   | 3.428     | C(41) | H(10)               | 3.033     |
| C(41) | H(15) <sup>1j</sup>  | 3.382     | C(41) | H(32) <sup>3j</sup> | 3.145     |
| C(42) | C(44) <sup>7j</sup>  | 3.539(13) | C(42) | H(20) <sup>2j</sup> | 3.358     |
| C(42) | H(36) <sup>7j</sup>  | 3.472     | C(42) | H(37) <sup>7j</sup> | 3.027     |
| C(43) | H(29) <sup>3j</sup>  | 3.499     | C(43) | H(40) <sup>8j</sup> | 3.163     |
| C(44) | C(42) <sup>3j</sup>  | 3.539(13) | C(44) | H(7) <sup>11j</sup> | 3.065     |
| C(44) | H(14) <sup>3j</sup>  | 3.352     | C(45) | O(1) <sup>7j</sup>  | 3.467(11) |
| C(45) | C(26) <sup>7j</sup>  | 3.491(13) | C(45) | H(20) <sup>2j</sup> | 2.903     |
| C(45) | H(28) <sup>2j</sup>  | 3.373     | C(45) | H(36) <sup>7j</sup> | 3.324     |
| C(45) | H(37) <sup>10j</sup> | 3.529     | C(45) | H(37) <sup>7j</sup> | 3.504     |
| C(46) | H(29) <sup>4j</sup>  | 3.567     | C(47) | C(30)               | 3.590(14) |
| C(47) | H(8)                 | 3.280     | C(47) | H(11)               | 3.438     |
| C(47) | H(36) <sup>7j</sup>  | 3.458     | C(48) | H(13) <sup>1j</sup> | 3.317     |
| C(48) | H(22) <sup>12j</sup> | 3.515     | C(48) | H(29) <sup>9j</sup> | 3.510     |
| C(48) | H(37) <sup>7j</sup>  | 3.525     | C(49) | N(8) <sup>1j</sup>  | 3.548(12) |
| C(49) | H(9) <sup>2j</sup>   | 3.564     | C(50) | C(41) <sup>2j</sup> | 3.364(13) |
| C(50) | H(3) <sup>2j</sup>   | 3.572     | C(50) | H(5)                | 3.453     |
| C(50) | H(8) <sup>1j</sup>   | 3.150     | C(50) | H(12) <sup>2j</sup> | 3.332     |
| C(50) | H(33) <sup>1j</sup>  | 3.524     | C(50) | H(34) <sup>1j</sup> | 3.226     |
| C(51) | O(2) <sup>9j</sup>   | 3.331(11) | C(51) | C(35) <sup>9j</sup> | 3.538(11) |
| C(51) | H(2) <sup>1j</sup>   | 3.383     | C(51) | H(17) <sup>9j</sup> | 3.311     |
| C(51) | H(18) <sup>9j</sup>  | 3.024     | C(51) | H(19) <sup>1j</sup> | 3.001     |
| C(51) | H(22) <sup>9j</sup>  | 3.483     | C(51) | H(23) <sup>4j</sup> | 3.260     |
| C(51) | H(25) <sup>3j</sup>  | 3.552     | C(52) | H(5)                | 3.478     |
| C(52) | H(7) <sup>1j</sup>   | 3.443     | C(52) | H(8) <sup>1j</sup>  | 3.149     |
| C(52) | H(11)                | 3.210     | C(52) | H(33) <sup>1j</sup> | 3.590     |

Table 6. Distances beyond the asymmetric unit out to 3.60 Å (continued)

| atom  | atom                 | distance | atom  | atom                 | distance |
|-------|----------------------|----------|-------|----------------------|----------|
| C(52) | H(34) <sup>11</sup>  | 3.342    | H(1)  | N(4) <sup>11</sup>   | 3.538    |
| H(1)  | N(8) <sup>11</sup>   | 3.411    | H(1)  | C(21) <sup>11</sup>  | 3.424    |
| H(1)  | H(30) <sup>11</sup>  | 2.758    | H(1)  | H(38) <sup>6</sup>   | 3.495    |
| H(2)  | N(2) <sup>23</sup>   | 3.352    | H(2)  | C(51) <sup>23</sup>  | 3.383    |
| H(2)  | H(31) <sup>91</sup>  | 3.324    | H(2)  | H(38) <sup>23</sup>  | 3.001    |
| H(2)  | H(39) <sup>23</sup>  | 3.224    | H(3)  | C(2) <sup>11</sup>   | 3.598    |
| H(3)  | C(18)                | 3.073    | H(3)  | C(36)                | 3.475    |
| H(3)  | C(38) <sup>11</sup>  | 3.579    | H(3)  | C(50) <sup>11</sup>  | 3.572    |
| H(3)  | H(4)                 | 2.675    | H(3)  | H(10)                | 3.241    |
| H(3)  | H(32) <sup>33</sup>  | 3.464    | H(4)  | N(10)                | 3.594    |
| H(4)  | C(3)                 | 3.160    | H(4)  | C(34) <sup>23</sup>  | 3.061    |
| H(4)  | C(41) <sup>23</sup>  | 3.134    | H(4)  | H(3)                 | 2.675    |
| H(4)  | H(9) <sup>23</sup>   | 2.467    | H(4)  | H(12) <sup>23</sup>  | 2.610    |
| H(4)  | H(15)                | 3.033    | H(4)  | H(32) <sup>33</sup>  | 3.333    |
| H(4)  | H(35) <sup>23</sup>  | 3.268    | H(5)  | C(30) <sup>11</sup>  | 3.491    |
| H(5)  | C(41) <sup>23</sup>  | 3.428    | H(5)  | C(50)                | 3.453    |
| H(5)  | C(52)                | 3.478    | H(5)  | H(8) <sup>11</sup>   | 3.070    |
| H(5)  | H(12) <sup>23</sup>  | 2.552    | H(5)  | H(15)                | 2.959    |
| H(5)  | H(16)                | 2.955    | H(5)  | H(35) <sup>23</sup>  | 3.161    |
| H(6)  | O(3) <sup>33</sup>   | 2.664    | H(6)  | C(19) <sup>33</sup>  | 3.480    |
| H(6)  | C(35) <sup>11</sup>  | 3.578    | H(6)  | C(38) <sup>33</sup>  | 3.569    |
| H(6)  | C(39) <sup>11</sup>  | 3.527    | H(6)  | H(18) <sup>11</sup>  | 3.129    |
| H(6)  | H(21) <sup>11</sup>  | 2.835    | H(6)  | H(32) <sup>33</sup>  | 3.522    |
| H(6)  | H(34) <sup>111</sup> | 3.185    | H(7)  | C(44) <sup>100</sup> | 3.065    |
| H(7)  | C(52) <sup>23</sup>  | 3.443    | H(7)  | H(16) <sup>23</sup>  | 2.684    |
| H(7)  | H(33)                | 3.544    | H(7)  | H(35) <sup>100</sup> | 2.844    |
| H(7)  | H(36) <sup>100</sup> | 3.497    | H(7)  | H(36) <sup>73</sup>  | 3.410    |
| H(7)  | H(37) <sup>100</sup> | 2.481    | H(8)  | C(20) <sup>23</sup>  | 3.206    |
| H(8)  | C(47)                | 3.280    | H(8)  | C(50) <sup>23</sup>  | 3.150    |
| H(8)  | C(52) <sup>23</sup>  | 3.149    | H(8)  | H(5) <sup>23</sup>   | 3.070    |
| H(8)  | H(14)                | 2.802    | H(8)  | H(15) <sup>23</sup>  | 2.555    |
| H(8)  | H(16) <sup>23</sup>  | 2.638    | H(8)  | H(33)                | 3.009    |
| H(9)  | N(10) <sup>11</sup>  | 3.521    | H(9)  | C(18) <sup>11</sup>  | 3.338    |
| H(9)  | C(32) <sup>111</sup> | 3.069    | H(9)  | C(49) <sup>11</sup>  | 3.564    |
| H(9)  | H(4) <sup>11</sup>   | 2.467    | H(9)  | H(32) <sup>111</sup> | 2.856    |
| H(9)  | H(33) <sup>111</sup> | 3.376    | H(9)  | H(34) <sup>111</sup> | 2.541    |
| H(10) | C(3)                 | 3.309    | H(10) | C(41)                | 3.033    |

Table 6. Distances beyond the asymmetric unit out to 3.60 Å (continued)

| atom  | atom                 | distance | atom  | atom                | distance |
|-------|----------------------|----------|-------|---------------------|----------|
| H(10) | H(3)                 | 3.241    | H(10) | H(12)               | 2.607    |
| H(10) | H(14) <sup>3)</sup>  | 3.425    | H(10) | H(32) <sup>3)</sup> | 3.223    |
| H(10) | H(33) <sup>3)</sup>  | 3.092    | H(11) | C(16) <sup>2)</sup> | 3.562    |
| H(11) | C(23) <sup>2)</sup>  | 3.585    | H(11) | C(33) <sup>2)</sup> | 3.546    |
| H(11) | C(47)                | 3.438    | H(11) | C(52)               | 3.210    |
| H(11) | H(14)                | 3.269    | H(11) | H(16)               | 2.647    |
| H(12) | C(18) <sup>1)</sup>  | 3.139    | H(12) | C(20) <sup>1)</sup> | 3.051    |
| H(12) | C(36)                | 3.246    | H(12) | C(50) <sup>1)</sup> | 3.332    |
| H(12) | H(4) <sup>1)</sup>   | 2.610    | H(12) | H(5) <sup>1)</sup>  | 2.552    |
| H(12) | H(10)                | 2.607    | H(12) | H(15) <sup>1)</sup> | 3.200    |
| H(12) | H(35)                | 3.128    | H(13) | O(1) <sup>7)</sup>  | 2.720    |
| H(13) | C(23) <sup>7)</sup>  | 3.586    | H(13) | C(26) <sup>7)</sup> | 3.590    |
| H(13) | C(37) <sup>2)</sup>  | 3.341    | H(13) | C(48) <sup>2)</sup> | 3.317    |
| H(13) | H(20) <sup>2)</sup>  | 2.709    | H(13) | H(28) <sup>2)</sup> | 2.595    |
| H(13) | H(37) <sup>10)</sup> | 3.046    | H(14) | C(30)               | 2.978    |
| H(14) | C(40)                | 3.339    | H(14) | C(44) <sup>7)</sup> | 3.352    |
| H(14) | H(8)                 | 2.802    | H(14) | H(10) <sup>7)</sup> | 3.425    |
| H(14) | H(11)                | 3.269    | H(14) | H(35) <sup>7)</sup> | 3.448    |
| H(14) | H(36) <sup>7)</sup>  | 2.607    | H(14) | H(37) <sup>7)</sup> | 3.564    |
| H(15) | C(18)                | 3.435    | H(15) | C(20)               | 3.419    |
| H(15) | C(30) <sup>1)</sup>  | 3.491    | H(15) | C(41) <sup>2)</sup> | 3.382    |
| H(15) | H(4)                 | 3.033    | H(15) | H(5)                | 2.959    |
| H(15) | H(8) <sup>1)</sup>   | 2.555    | H(15) | H(12) <sup>2)</sup> | 3.200    |
| H(15) | H(33) <sup>1)</sup>  | 3.481    | H(15) | H(34) <sup>1)</sup> | 3.550    |
| H(16) | N(13)                | 3.557    | H(16) | C(29) <sup>1)</sup> | 3.211    |
| H(16) | C(30) <sup>1)</sup>  | 3.207    | H(16) | C(40)               | 3.194    |
| H(16) | H(5)                 | 2.955    | H(16) | H(7) <sup>1)</sup>  | 2.684    |
| H(16) | H(8) <sup>1)</sup>   | 2.638    | H(16) | H(11)               | 2.647    |
| H(16) | H(36) <sup>7)</sup>  | 3.577    | H(16) | H(37) <sup>7)</sup> | 3.546    |
| H(17) | O(1) <sup>8)</sup>   | 3.568    | H(17) | O(2) <sup>1)</sup>  | 3.138    |
| H(17) | O(5) <sup>8)</sup>   | 3.516    | H(17) | N(8) <sup>1)</sup>  | 3.251    |
| H(17) | C(21) <sup>1)</sup>  | 3.113    | H(17) | C(51) <sup>6)</sup> | 3.311    |
| H(17) | H(30) <sup>1)</sup>  | 2.879    | H(17) | H(31) <sup>1)</sup> | 2.838    |
| H(17) | H(38) <sup>6)</sup>  | 3.071    | H(17) | H(39) <sup>6)</sup> | 2.945    |
| H(17) | H(40) <sup>6)</sup>  | 3.384    | H(18) | C(24) <sup>2)</sup> | 3.254    |
| H(18) | C(31) <sup>2)</sup>  | 3.455    | H(18) | C(51) <sup>6)</sup> | 3.024    |
| H(18) | H(6) <sup>2)</sup>   | 3.129    | H(18) | H(23) <sup>2)</sup> | 3.168    |

Table 6. Distances beyond the asymmetric unit out to 3.60 Å (continued)

| atom  | atom                 | distance | atom  | atom                 | distance |
|-------|----------------------|----------|-------|----------------------|----------|
| H(18) | H(30) <sup>11</sup>  | 3.487    | H(18) | H(38) <sup>6j</sup>  | 2.981    |
| H(18) | H(39) <sup>6j</sup>  | 2.932    | H(18) | H(40) <sup>6j</sup>  | 2.652    |
| H(19) | O(5) <sup>2j</sup>   | 3.349    | H(19) | N(2) <sup>2j</sup>   | 3.157    |
| H(19) | C(21) <sup>9j</sup>  | 3.267    | H(19) | C(51) <sup>2j</sup>  | 3.001    |
| H(19) | H(29) <sup>9j</sup>  | 3.274    | H(19) | H(30) <sup>9j</sup>  | 2.728    |
| H(19) | H(31) <sup>9j</sup>  | 3.289    | H(19) | H(38) <sup>2j</sup>  | 2.196    |
| H(19) | H(39) <sup>2j</sup>  | 3.488    | H(20) | C(21) <sup>9j</sup>  | 3.339    |
| H(20) | C(29) <sup>1j</sup>  | 3.541    | H(20) | C(42) <sup>1j</sup>  | 3.358    |
| H(20) | C(45) <sup>1j</sup>  | 2.903    | H(20) | H(13) <sup>1j</sup>  | 2.709    |
| H(20) | H(26) <sup>1j</sup>  | 3.124    | H(20) | H(29) <sup>9j</sup>  | 3.056    |
| H(20) | H(30) <sup>9j</sup>  | 3.230    | H(20) | H(31) <sup>9j</sup>  | 3.174    |
| H(20) | H(38) <sup>2j</sup>  | 3.449    | H(21) | N(4) <sup>3j</sup>   | 3.041    |
| H(21) | C(24) <sup>2j</sup>  | 3.478    | H(21) | C(32) <sup>3j</sup>  | 3.560    |
| H(21) | H(6) <sup>2j</sup>   | 2.835    | H(21) | H(29) <sup>3j</sup>  | 3.165    |
| H(21) | H(32) <sup>3j</sup>  | 3.175    | H(21) | H(34) <sup>3j</sup>  | 3.349    |
| H(22) | O(1) <sup>8j</sup>   | 3.043    | H(22) | C(48) <sup>13j</sup> | 3.515    |
| H(22) | C(51) <sup>6j</sup>  | 3.483    | H(22) | H(27) <sup>13j</sup> | 2.909    |
| H(22) | H(28) <sup>13j</sup> | 3.236    | H(22) | H(29) <sup>3j</sup>  | 3.086    |
| H(22) | H(39) <sup>6j</sup>  | 2.787    | H(22) | H(40) <sup>6j</sup>  | 3.377    |
| H(23) | O(1) <sup>8j</sup>   | 3.214    | H(23) | O(2) <sup>1j</sup>   | 2.977    |
| H(23) | C(51) <sup>8j</sup>  | 3.260    | H(23) | H(18) <sup>1j</sup>  | 3.168    |
| H(23) | H(40) <sup>8j</sup>  | 2.316    | H(24) | O(3) <sup>3j</sup>   | 2.829    |
| H(24) | N(4) <sup>3j</sup>   | 3.321    | H(24) | N(8) <sup>3j</sup>   | 3.574    |
| H(24) | C(21) <sup>3j</sup>  | 3.599    | H(24) | H(25) <sup>14j</sup> | 3.256    |
| H(24) | H(26) <sup>14j</sup> | 3.336    | H(24) | H(29) <sup>3j</sup>  | 2.843    |
| H(24) | H(40) <sup>8j</sup>  | 3.256    | H(25) | O(1) <sup>7j</sup>   | 2.810    |
| H(25) | N(1) <sup>7j</sup>   | 3.086    | H(25) | N(2) <sup>7j</sup>   | 3.439    |
| H(25) | C(26) <sup>7j</sup>  | 3.512    | H(25) | C(51) <sup>7j</sup>  | 3.552    |
| H(25) | H(24) <sup>15j</sup> | 3.256    | H(25) | H(39) <sup>7j</sup>  | 3.483    |
| H(25) | H(40) <sup>7j</sup>  | 3.214    | H(26) | O(3) <sup>4j</sup>   | 3.200    |
| H(26) | O(5) <sup>2j</sup>   | 3.256    | H(26) | C(21) <sup>4j</sup>  | 3.153    |
| H(26) | H(20) <sup>2j</sup>  | 3.124    | H(26) | H(24) <sup>15j</sup> | 3.336    |
| H(26) | H(29) <sup>4j</sup>  | 2.691    | H(26) | H(31) <sup>4j</sup>  | 2.755    |
| H(27) | O(3) <sup>4j</sup>   | 2.845    | H(27) | C(21) <sup>9j</sup>  | 3.410    |
| H(27) | H(22) <sup>12j</sup> | 2.909    | H(27) | H(29) <sup>9j</sup>  | 2.892    |
| H(27) | H(30) <sup>9j</sup>  | 3.068    | H(28) | O(1) <sup>16j</sup>  | 3.479    |
| H(28) | N(1) <sup>7j</sup>   | 3.081    | H(28) | C(45) <sup>1j</sup>  | 3.373    |

Table 6. Distances beyond the asymmetric unit out to 3.60 Å (continued)

| atom  | atom                | distance | atom  | atom                | distance |
|-------|---------------------|----------|-------|---------------------|----------|
| H(28) | H(13) <sup>11</sup> | 2.595    | H(28) | H(22) <sup>12</sup> | 3.236    |
| H(28) | H(37) <sup>7</sup>  | 2.921    | H(28) | H(39) <sup>7</sup>  | 3.149    |
| H(29) | C(37) <sup>6</sup>  | 3.445    | H(29) | C(39) <sup>7</sup>  | 3.403    |
| H(29) | C(43) <sup>7</sup>  | 3.499    | H(29) | C(46) <sup>8</sup>  | 3.567    |
| H(29) | C(48) <sup>6</sup>  | 3.510    | H(29) | H(19) <sup>6</sup>  | 3.274    |
| H(29) | H(20) <sup>6</sup>  | 3.056    | H(29) | H(21) <sup>7</sup>  | 3.165    |
| H(29) | H(22) <sup>7</sup>  | 3.086    | H(29) | H(24) <sup>7</sup>  | 2.843    |
| H(29) | H(26) <sup>8</sup>  | 2.691    | H(29) | H(27) <sup>6</sup>  | 2.892    |
| H(30) | S(1) <sup>2</sup>   | 3.473    | H(30) | O(2) <sup>2</sup>   | 3.189    |
| H(30) | O(3) <sup>2</sup>   | 3.005    | H(30) | N(5) <sup>2</sup>   | 3.285    |
| H(30) | C(35) <sup>2</sup>  | 3.527    | H(30) | C(37) <sup>6</sup>  | 3.311    |
| H(30) | H(1) <sup>2</sup>   | 2.758    | H(30) | H(17) <sup>2</sup>  | 2.879    |
| H(30) | H(18) <sup>2</sup>  | 3.487    | H(30) | H(19) <sup>6</sup>  | 2.728    |
| H(30) | H(20) <sup>6</sup>  | 3.230    | H(30) | H(27) <sup>6</sup>  | 3.068    |
| H(30) | H(38) <sup>17</sup> | 2.935    | H(31) | O(5) <sup>6</sup>   | 2.528    |
| H(31) | H(2) <sup>6</sup>   | 3.324    | H(31) | H(17) <sup>2</sup>  | 2.838    |
| H(31) | H(19) <sup>6</sup>  | 3.289    | H(31) | H(20) <sup>6</sup>  | 3.174    |
| H(31) | H(26) <sup>8</sup>  | 2.755    | H(31) | H(38) <sup>17</sup> | 3.536    |
| H(32) | C(3) <sup>7</sup>   | 2.926    | H(32) | C(24) <sup>7</sup>  | 3.005    |
| H(32) | C(27) <sup>7</sup>  | 2.823    | H(32) | C(31) <sup>7</sup>  | 2.951    |
| H(32) | C(34) <sup>7</sup>  | 3.156    | H(32) | C(41) <sup>7</sup>  | 3.145    |
| H(32) | H(3) <sup>7</sup>   | 3.464    | H(32) | H(4) <sup>7</sup>   | 3.333    |
| H(32) | H(6) <sup>7</sup>   | 3.522    | H(32) | H(9) <sup>10</sup>  | 2.856    |
| H(32) | H(10) <sup>7</sup>  | 3.223    | H(32) | H(21) <sup>7</sup>  | 3.175    |
| H(33) | C(30)               | 3.439    | H(33) | C(50) <sup>2</sup>  | 3.524    |
| H(33) | C(52) <sup>2</sup>  | 3.590    | H(33) | H(7)                | 3.544    |
| H(33) | H(8)                | 3.009    | H(33) | H(9) <sup>10</sup>  | 3.376    |
| H(33) | H(10) <sup>7</sup>  | 3.092    | H(33) | H(15) <sup>2</sup>  | 3.481    |
| H(33) | H(36) <sup>7</sup>  | 3.416    | H(34) | C(2) <sup>2</sup>   | 3.509    |
| H(34) | C(28) <sup>2</sup>  | 3.275    | H(34) | C(34) <sup>10</sup> | 3.303    |
| H(34) | C(50) <sup>2</sup>  | 3.226    | H(34) | C(52) <sup>2</sup>  | 3.342    |
| H(34) | H(6) <sup>10</sup>  | 3.185    | H(34) | H(9) <sup>10</sup>  | 2.541    |
| H(34) | H(15) <sup>2</sup>  | 3.550    | H(34) | H(21) <sup>7</sup>  | 3.349    |
| H(35) | C(16) <sup>11</sup> | 3.404    | H(35) | C(18) <sup>11</sup> | 3.083    |
| H(35) | C(20) <sup>11</sup> | 2.928    | H(35) | C(36) <sup>11</sup> | 3.556    |
| H(35) | H(4) <sup>11</sup>  | 3.268    | H(35) | H(5) <sup>11</sup>  | 3.161    |
| H(35) | H(7) <sup>11</sup>  | 2.844    | H(35) | H(12)               | 3.128    |



Table 6. Distances beyond the asymmetric unit out to 3.60 Å (continued)

| atom  | atom                 | distance | atom  | atom                 | distance |
|-------|----------------------|----------|-------|----------------------|----------|
| H(35) | H(14) <sup>3j</sup>  | 3.448    | H(36) | C(25) <sup>3j</sup>  | 3.577    |
| H(36) | C(29) <sup>3j</sup>  | 3.112    | H(36) | C(30) <sup>3j</sup>  | 3.136    |
| H(36) | C(40) <sup>3j</sup>  | 3.419    | H(36) | C(42) <sup>3j</sup>  | 3.472    |
| H(36) | C(45) <sup>3j</sup>  | 3.324    | H(36) | C(47) <sup>3j</sup>  | 3.458    |
| H(36) | H(7) <sup>3j</sup>   | 3.410    | H(36) | H(7) <sup>11j</sup>  | 3.497    |
| H(36) | H(14) <sup>3j</sup>  | 2.607    | H(36) | H(16) <sup>3j</sup>  | 3.577    |
| H(36) | H(33) <sup>3j</sup>  | 3.416    | H(37) | C(1) <sup>3j</sup>   | 3.541    |
| H(37) | C(25) <sup>3j</sup>  | 3.050    | H(37) | C(29) <sup>11j</sup> | 3.225    |
| H(37) | C(40) <sup>3j</sup>  | 3.397    | H(37) | C(42) <sup>3j</sup>  | 3.027    |
| H(37) | C(45) <sup>3j</sup>  | 3.504    | H(37) | C(45) <sup>11j</sup> | 3.529    |
| H(37) | C(48) <sup>3j</sup>  | 3.525    | H(37) | H(7) <sup>11j</sup>  | 2.481    |
| H(37) | H(13) <sup>11j</sup> | 3.046    | H(37) | H(14) <sup>3j</sup>  | 3.564    |
| H(37) | H(16) <sup>3j</sup>  | 3.546    | H(37) | H(28) <sup>3j</sup>  | 2.921    |
| H(38) | O(2) <sup>9j</sup>   | 2.853    | H(38) | N(3) <sup>1j</sup>   | 3.502    |
| H(38) | C(1) <sup>1j</sup>   | 3.554    | H(38) | C(35) <sup>9j</sup>  | 3.453    |
| H(38) | C(37) <sup>1j</sup>  | 3.093    | H(38) | H(1) <sup>9j</sup>   | 3.495    |
| H(38) | H(2) <sup>1j</sup>   | 3.001    | H(38) | H(17) <sup>9j</sup>  | 3.071    |
| H(38) | H(18) <sup>9j</sup>  | 2.981    | H(38) | H(19) <sup>1j</sup>  | 2.196    |
| H(38) | H(20) <sup>1j</sup>  | 3.449    | H(38) | H(30) <sup>18j</sup> | 2.935    |
| H(38) | H(31) <sup>18j</sup> | 3.536    | H(39) | S(2) <sup>1j</sup>   | 3.529    |
| H(39) | O(1) <sup>1j</sup>   | 2.765    | H(39) | O(5) <sup>1j</sup>   | 3.501    |
| H(39) | C(35) <sup>9j</sup>  | 3.228    | H(39) | C(39) <sup>9j</sup>  | 3.407    |
| H(39) | H(2) <sup>1j</sup>   | 3.224    | H(39) | H(17) <sup>9j</sup>  | 2.945    |
| H(39) | H(18) <sup>9j</sup>  | 2.932    | H(39) | H(19) <sup>1j</sup>  | 3.488    |
| H(39) | H(22) <sup>9j</sup>  | 2.787    | H(39) | H(25) <sup>3j</sup>  | 3.483    |
| H(39) | H(28) <sup>3j</sup>  | 3.149    | H(40) | O(2) <sup>9j</sup>   | 2.933    |
| H(40) | C(35) <sup>9j</sup>  | 3.356    | H(40) | C(43) <sup>4j</sup>  | 3.163    |
| H(40) | H(17) <sup>9j</sup>  | 3.384    | H(40) | H(18) <sup>9j</sup>  | 2.652    |
| H(40) | H(22) <sup>9j</sup>  | 3.377    | H(40) | H(23) <sup>4j</sup>  | 2.316    |
| H(40) | H(24) <sup>4j</sup>  | 3.256    | H(40) | H(25) <sup>3j</sup>  | 3.214    |

Symmetry Operators:

- |                  |                  |
|------------------|------------------|
| (1) X+1,Y,Z      | (2) X-1,Y,Z      |
| (3) X+1,Y-1,Z    | (4) X,Y,Z+1      |
| (5) X,Y-1,Z      | (6) X-1,Y,Z-1    |
| (7) X-1,Y+1,Z    | (8) X,Y,Z-1      |
| (9) X+1,Y,Z+1    | (10) X-2,Y+1,Z   |
| (11) X+2,Y-1,Z   | (12) X,Y+1,Z+1   |
| (13) X,Y-1,Z-1   | (14) X+1,Y-1,Z-1 |
| (15) X-1,Y+1,Z+1 | (16) X,Y+1,Z     |
| (17) X-2,Y,Z-1   | (18) X+2,Y,Z+1   |

Table 7. Intramolecular and Intermolecular Hydrogen bonds

| D    | H    | A    | D...A     | D-H   | H...A | D-H...A |
|------|------|------|-----------|-------|-------|---------|
| N(3) | H(2) | O(5) | 2.768(10) | 0.950 | 2.003 | 136.2   |
| N(5) | H(1) | O(2) | 2.834(9)  | 0.950 | 2.066 | 136.8   |

Note) 1. The symmetry operations are applied to the acceptors.  
2. Estimated standard deviations (esd's) are shown in the parentheses.  
They are not calculated when all atoms have an esd=0.0.
