# Supplementary material for: Thiadiazino-indole, thiadiazino-carbazole and benzothiadiazino-carbazole dioxides: synthesis, physicochemical and early ADME characterization of representatives of new tri-, tetra- and pentacyclic ring systems and their intermediates
Source: publisher site journal article supplement (doi:10.3762/bjoc.21.169), 2025-10-21
Supplement: Additional file 2 [file 3b_xrd.pdf › Átnevezett XRD/3b_xrd.pdf]

**142611**

**PGY0686\_1B**

Submitted by Pusztai Gyongyver  
Operator: Dancso Andras

X-ray Structure Report

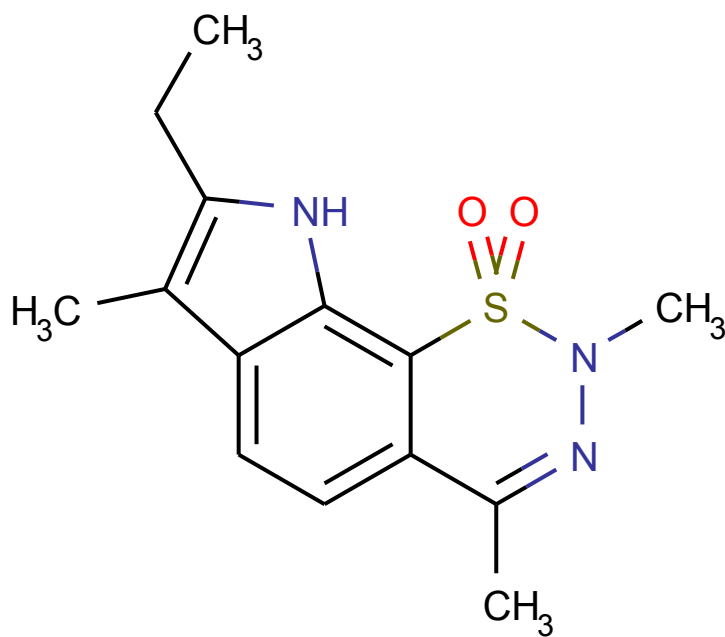

January 16, 2025

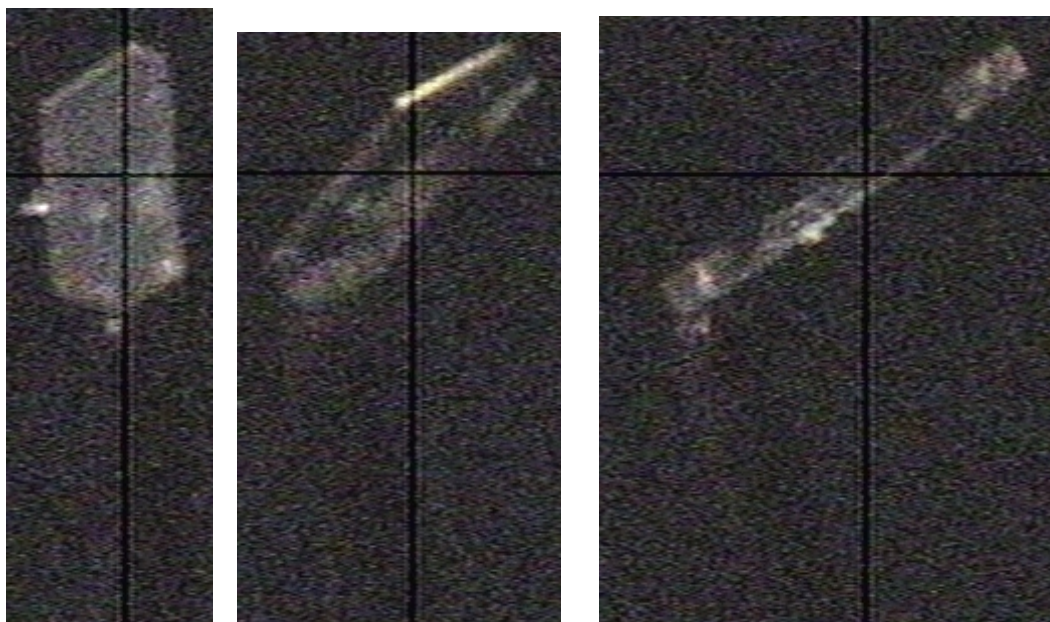

Fig. 1. The crystal

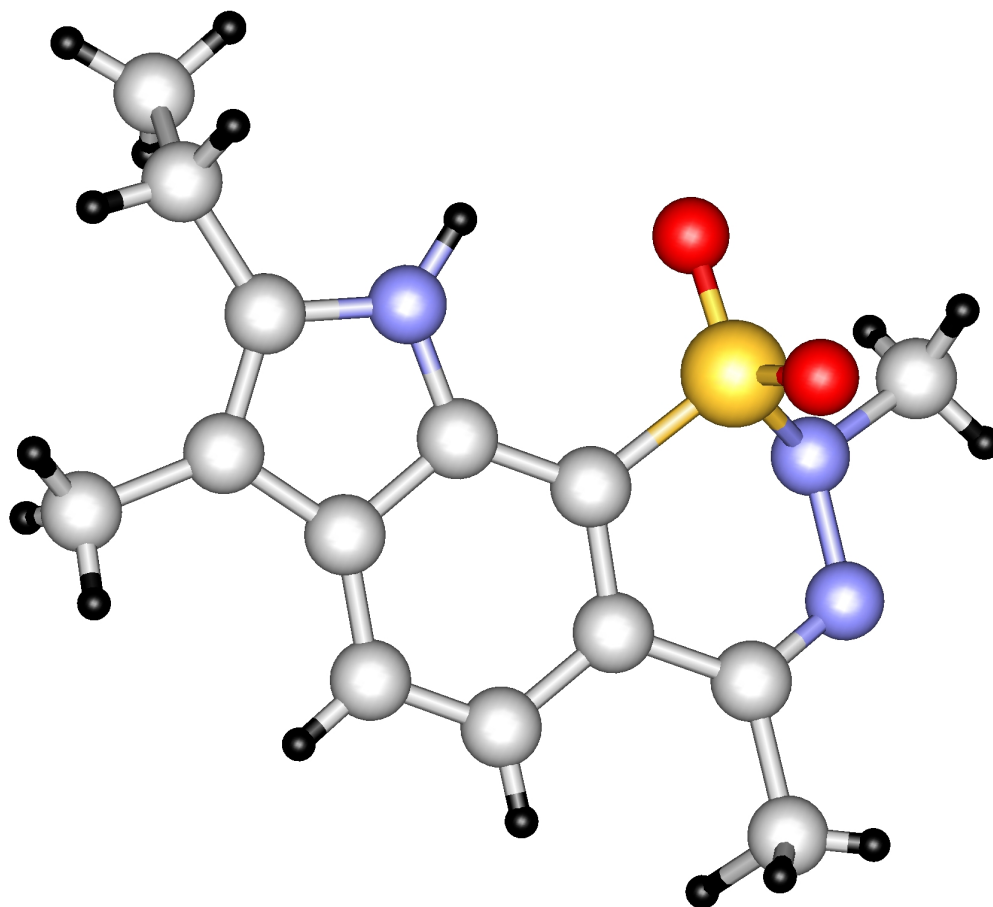

Fig. 2. The molecule (most of the hydrogens were generated by the software)

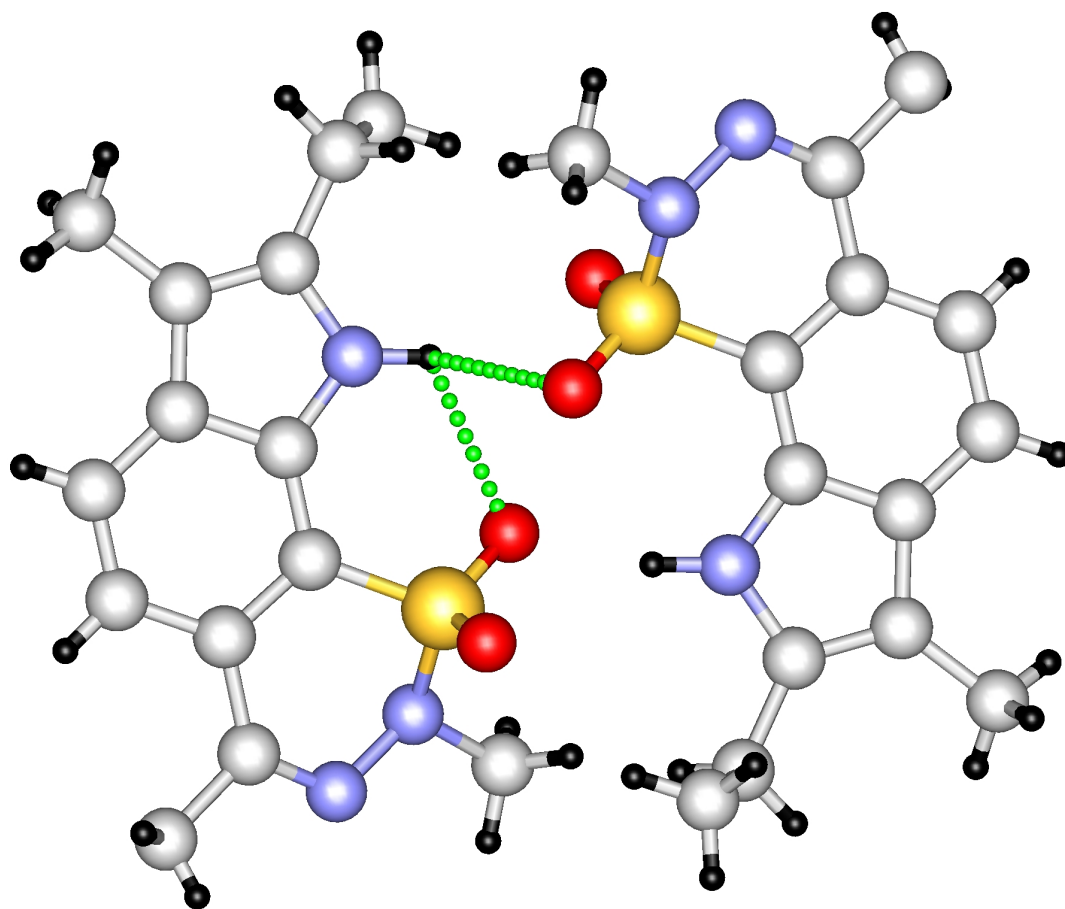

Fig. 3. Hydrogen bonds

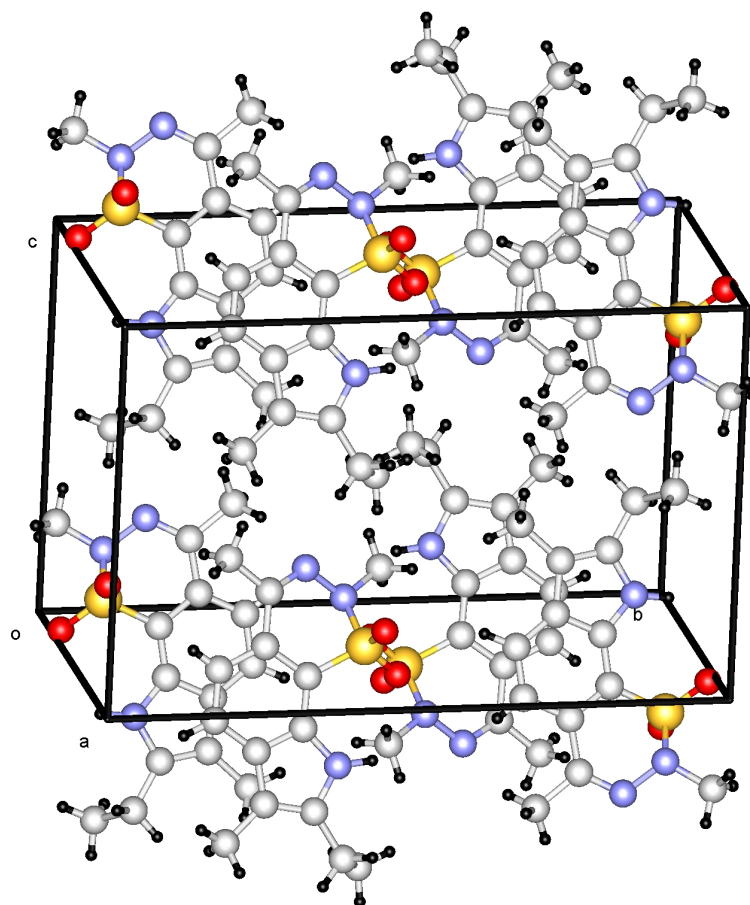

Fig. 4. Packing

## *Experimental*

### Data Collection

A colorless platelet crystal of  $C_{14}H_{17}N_3O_2S$  having approximate dimensions of 0.64 x 0.18 x 0.06 mm was mounted on a cactus needle. All measurements were made on a Rigaku RAXIS RAPID imaging plate area detector with graphite monochromated Cu-K $\alpha$  radiation.

Indexing was performed from 4 oscillations that were exposed for 720 seconds. The crystal-to-detector distance was 127.40 mm.

Cell constants and an orientation matrix for data collection corresponded to a primitive monoclinic cell with dimensions:

$$\begin{aligned}a &= 7.6009(5) \text{ \AA} \\b &= 17.1310(10) \text{ \AA} \quad \beta = 95.705(4)^\circ \\c &= 10.9012(8) \text{ \AA} \\V &= 1412.43(16) \text{ \AA}^3\end{aligned}$$

For  $Z = 4$  and F.W. = 291.37, the calculated density is 1.370 g/cm<sup>3</sup>. The systematic absences of:

$$\begin{aligned}h0l: h \pm 2n \\0k0: k \pm 2n\end{aligned}$$

uniquely determine the space group to be:

$$P2_1/a \text{ (\#14)}$$

The data were collected at a temperature of  $20 \pm 1^\circ\text{C}$  to a maximum  $2\theta$  value of  $142.8^\circ$ . A total of 180 oscillation images were collected. A sweep of data was done using  $\omega$  scans from  $20.0$  to  $200.0^\circ$  in  $5.0^\circ$  step, at  $\chi=0.0^\circ$  and  $\phi = 0.0^\circ$ . The exposure rate was 144.0 [sec./ $^\circ$ ]. A second sweep was performed using  $\omega$  scans from  $20.0$  to  $200.0^\circ$  in  $5.0^\circ$  step, at  $\chi=54.0^\circ$  and  $\phi = 0.0^\circ$ . The exposure rate was 144.0 [sec./ $^\circ$ ]. Another sweep was performed using  $\omega$  scans from  $20.0$  to  $200.0^\circ$  in  $5.0^\circ$  step, at  $\chi=54.0^\circ$  and  $\phi = 90.0^\circ$ . The exposure rate was 144.0 [sec./ $^\circ$ ]. Another sweep was performed using  $\omega$  scans from  $20.0$  to  $200.0^\circ$  in  $5.0^\circ$  step, at  $\chi=54.0^\circ$  and  $\phi = 180.0^\circ$ . The exposure rate was 144.0 [sec./ $^\circ$ ]. Another sweep was performed using  $\omega$  scans from  $20.0$  to  $200.0^\circ$  in  $5.0^\circ$  step, at  $\chi=54.0^\circ$  and  $\phi = 270.0^\circ$ . The exposure rate was 144.0 [sec./ $^\circ$ ]. The crystal-to-detector distance was 127.40 mm. Readout was performed in the 0.100 mm pixel mode.

## Data Reduction

Of the 16288 reflections that were collected, 2587 were unique ( $R_{\text{int}} = 0.056$ ).

The linear absorption coefficient,  $\mu$ , for Cu-K $\alpha$  radiation is 20.864 cm<sup>-1</sup>. An empirical absorption correction was applied which resulted in transmission factors ranging from 0.605 to 0.882. The data were corrected for Lorentz and polarization effects.

## Structure Solution and Refinement

The structure was solved by direct methods<sup>1</sup> and expanded using Fourier techniques<sup>2</sup>. The non-hydrogen atoms were refined anisotropically. Some hydrogen atoms were refined isotropically and the rest were refined using the riding model. The final cycle of full-matrix least-squares refinement<sup>3</sup> on F was based on 9573 observed reflections ( $I > 2.00\sigma(I)$ ) and 204 variable parameters and converged (largest parameter shift was 0.00 times its esd) with unweighted and weighted agreement factors of:

$$R = \Sigma ||F_o| - |F_c|| / \Sigma |F_o| = 0.0578$$

$$R_w = [ \Sigma w (|F_o| - |F_c|)^2 / \Sigma w F_o^2 ]^{1/2} = 0.0716$$

The standard deviation of an observation of unit weight<sup>4</sup> was 9.81. Unit weights were used. Plots of  $\Sigma w (|F_o| - |F_c|)^2$  versus  $|F_o|$ , reflection order in data collection,  $\sin \theta/\lambda$  and various classes of indices showed no unusual trends. The maximum and minimum peaks on the final difference Fourier map corresponded to 5.84 and -4.41 e<sup>-</sup>/Å<sup>3</sup>, respectively.

Neutral atom scattering factors were taken from Cromer and Waber<sup>5</sup>. Anomalous dispersion effects were included in  $F_{\text{calc}}$ <sup>6</sup>; the values for  $\Delta f'$  and  $\Delta f''$  were those of Creagh and McAuley<sup>7</sup>. The values for the mass attenuation coefficients are those of Creagh and Hubbell<sup>8</sup>. All calculations were performed using the CrystalStructure<sup>9,10</sup> crystallographic software package.

## *References*

- (1) SIR92: Altomare, A., Cascarano, G., Giacovazzo, C., Guagliardi, A., Burla, M., Polidori, G., and Camalli, M. (1994) J. Appl. Cryst., 27, 435.
- (2) DIRDIF99: Beurskens, P.T., Admiraal, G., Beurskens, G., Bosman, W.P., de Gelder, R., Israel, R. and Smits, J.M.M. (1999). The DIRDIF-99 program system, Technical Report of the Crystallography Laboratory, University of Nijmegen, The Netherlands.

(3) Least Squares function minimized:

$$\sum w(|F_o| - |F_c|)^2 \quad \text{where } w = \text{Least Squares weights.}$$

(4) Standard deviation of an observation of unit weight:

$$[\sum w(|F_o| - |F_c|)^2 / (N_o - N_v)]^{1/2}$$

where:  $N_o$  = number of observations

$N_v$  = number of variables

(5) Cromer, D. T. & Waber, J. T.; "International Tables for X-ray Crystallography", Vol. IV, The Kynoch Press, Birmingham, England, Table 2.2 A (1974).

(6) Ibers, J. A. & Hamilton, W. C.; Acta Crystallogr., 17, 781 (1964).

(7) Creagh, D. C. & McAuley, W.J. .; "International Tables for Crystallography", Vol C, (A.J.C. Wilson, ed.), Kluwer Academic Publishers, Boston, Table 4.2.6.8, pages 219-222 (1992).

(8) Creagh, D. C. & Hubbell, J.H.; "International Tables for Crystallography", Vol C, (A.J.C. Wilson, ed.), Kluwer Academic Publishers, Boston, Table 4.2.4.3, pages 200-206 (1992).

(9) CrystalStructure 3.7.0: Crystal Structure Analysis Package, Rigaku and Rigaku/MSK (2000-2005). 9009 New Trails Dr. The Woodlands TX 77381 USA.

(10) CRYSTALS Issue 10: Watkin, D.J., Prout, C.K. Carruthers, J.R. & Betteridge, P.W. Chemical Crystallography Laboratory, Oxford, UK. (1996)



## EXPERIMENTAL DETAILS

### A. Crystal Data

|                         |                                                                                                                                                              |
|-------------------------|--------------------------------------------------------------------------------------------------------------------------------------------------------------|
| Empirical Formula       | $\text{C}_{14}\text{H}_{17}\text{N}_3\text{O}_2\text{S}$                                                                                                     |
| Formula Weight          | 291.37                                                                                                                                                       |
| Crystal Color, Habit    | colorless, platelet                                                                                                                                          |
| Crystal Dimensions      | 0.64 X 0.18 X 0.06 mm                                                                                                                                        |
| Crystal System          | monoclinic                                                                                                                                                   |
| Lattice Type            | Primitive                                                                                                                                                    |
| Indexing Images         | 4 oscillations @ 720.0 seconds                                                                                                                               |
| Detector Position       | 127.40 mm                                                                                                                                                    |
| Pixel Size              | 0.100 mm                                                                                                                                                     |
| Lattice Parameters      | $a = 7.6009(5) \text{ \AA}$<br>$b = 17.1310(10) \text{ \AA}$<br>$c = 10.9012(8) \text{ \AA}$<br>$\beta = 95.705(4)^\circ$<br>$V = 1412.43(16) \text{ \AA}^3$ |
| Space Group             | $P2_1/a$ (#14)                                                                                                                                               |
| Z value                 | 4                                                                                                                                                            |
| $D_{\text{calc}}$       | $1.370 \text{ g/cm}^3$                                                                                                                                       |
| $F_{000}$               | 616.00                                                                                                                                                       |
| $\mu(\text{CuK}\alpha)$ | $20.864 \text{ cm}^{-1}$                                                                                                                                     |

## B. Intensity Measurements

|                                                           |                                                                       |
|-----------------------------------------------------------|-----------------------------------------------------------------------|
| Diffractometer                                            | Rigaku RAXIS-RAPID                                                    |
| Radiation                                                 | CuK $\alpha$ ( $\lambda$ = 1.54187 Å)<br>graphite monochromated       |
| Detector Aperture                                         | 280 mm x 256 mm                                                       |
| Data Images                                               | 180 exposures                                                         |
| $\omega$ oscillation Range ( $\chi$ =0.0, $\phi$ =0.0)    | 20.0 - 200.0 $^{\circ}$                                               |
| Exposure Rate                                             | 144.0 sec./ $^{\circ}$                                                |
| $\omega$ oscillation Range ( $\chi$ =54.0, $\phi$ =0.0)   | 20.0 - 200.0 $^{\circ}$                                               |
| Exposure Rate                                             | 144.0 sec./ $^{\circ}$                                                |
| $\omega$ oscillation Range ( $\chi$ =54.0, $\phi$ =90.0)  | 20.0 - 200.0 $^{\circ}$                                               |
| Exposure Rate                                             | 144.0 sec./ $^{\circ}$                                                |
| $\omega$ oscillation Range ( $\chi$ =54.0, $\phi$ =180.0) | 20.0 - 200.0 $^{\circ}$                                               |
| Exposure Rate                                             | 144.0 sec./ $^{\circ}$                                                |
| $\omega$ oscillation Range ( $\chi$ =54.0, $\phi$ =270.0) | 20.0 - 200.0 $^{\circ}$                                               |
| Exposure Rate                                             | 144.0 sec./ $^{\circ}$                                                |
| Detector Position                                         | 127.40 mm                                                             |
| Pixel Size                                                | 0.100 mm                                                              |
| $2\theta_{\max}$                                          | 142.8 $^{\circ}$                                                      |
| No. of Reflections Measured                               | Total: 16288<br>Unique: 2587 ( $R_{\text{int}}$ = 0.056)              |
| Corrections                                               | Lorentz-polarization<br>Absorption<br>(trans. factors: 0.605 - 0.882) |

### C. Structure Solution and Refinement

|                                          |                                |
|------------------------------------------|--------------------------------|
| Structure Solution                       | Direct Methods (SIR92)         |
| Refinement                               | Full-matrix least-squares on F |
| Function Minimized                       | $\Sigma w ( Fo  -  Fc )^2$     |
| Least Squares Weights                    | 1                              |
| $2\theta_{\text{max}}$ cutoff            | 142.8 $^{\circ}$               |
| Anomalous Dispersion                     | All non-hydrogen atoms         |
| No. Observations ( $I > 2.00\sigma(I)$ ) | 9573                           |
| No. Variables                            | 204                            |
| Reflection/Parameter Ratio               | 46.93                          |
| Residuals: R ( $I > 2.00\sigma(I)$ )     | 0.0578                         |
| Residuals: Rw ( $I > 2.00\sigma(I)$ )    | 0.0716                         |
| Goodness of Fit Indicator                | 9.813                          |
| Max Shift/Error in Final Cycle           | 0.000                          |
| Maximum peak in Final Diff. Map          | 5.84 e $^{-}/\text{\AA}^3$     |
| Minimum peak in Final Diff. Map          | -4.41 e $^{-}/\text{\AA}^3$    |

Table 1. Atomic coordinates and  $B_{iso}/B_{eq}$

| atom  | x           | y           | z           | $B_{eq}$ |
|-------|-------------|-------------|-------------|----------|
| S(1)  | 0.29792(12) | 0.06756(4)  | 1.10979(8)  | 2.64(2)  |
| O(2)  | 0.4560(2)   | 0.05483(10) | 1.19017(18) | 3.13(5)  |
| O(3)  | 0.2488(2)   | 0.00721(11) | 1.02102(19) | 3.46(5)  |
| N(4)  | 0.3983(2)   | 0.11418(12) | 0.8354(2)   | 2.35(6)  |
| N(5)  | 0.1370(3)   | 0.14898(14) | 1.2686(2)   | 2.83(7)  |
| N(6)  | 0.1251(3)   | 0.08449(12) | 1.1872(2)   | 2.92(7)  |
| C(7)  | 0.3558(3)   | 0.16761(16) | 0.9214(3)   | 2.05(8)  |
| C(8)  | 0.2834(4)   | 0.29859(18) | 1.0571(3)   | 2.68(9)  |
| C(9)  | 0.3326(4)   | 0.30778(18) | 0.9411(3)   | 2.57(9)  |
| C(10) | 0.3696(3)   | 0.24272(16) | 0.8700(3)   | 2.18(7)  |
| C(11) | 0.2673(3)   | 0.22429(16) | 1.1091(2)   | 2.06(7)  |
| C(12) | 0.4221(3)   | 0.23263(17) | 0.7490(3)   | 2.51(8)  |
| C(13) | 0.4554(4)   | 0.29644(16) | 0.6614(2)   | 3.95(9)  |
| C(14) | 0.4828(4)   | 0.10926(17) | 0.6200(2)   | 3.46(9)  |
| C(15) | 0.3064(3)   | 0.15824(16) | 1.0399(2)   | 2.12(7)  |
| C(16) | 0.2022(3)   | 0.21348(17) | 1.2300(3)   | 2.52(8)  |
| C(17) | 0.2024(3)   | 0.28092(16) | 1.3179(2)   | 3.31(9)  |
| C(18) | 0.4380(3)   | 0.15384(17) | 0.7309(2)   | 2.50(8)  |
| C(19) | 0.0340(4)   | 0.01740(16) | 1.2347(2)   | 4.06(9)  |
| C(20) | 0.3229(4)   | 0.0659(2)   | 0.5539(3)   | 6.03(12) |
| H(1)  | 0.348(3)    | 0.3583(14)  | 0.909(2)    | 2.9(6)   |
| H(2)  | 0.276(2)    | 0.3402(13)  | 1.106(2)    | 1.7(6)   |
| H(3)  | 0.3985      | 0.0591      | 0.8454      | 2.92     |
| H(4)  | 0.3482      | 0.3088      | 0.6130      | 4.89     |
| H(5)  | 0.5421      | 0.2815      | 0.6090      | 4.86     |
| H(6)  | 0.4956      | 0.3408      | 0.7083      | 4.89     |
| H(7)  | 0.5263      | 0.1446      | 0.5630      | 4.29     |
| H(8)  | 0.5722      | 0.0724      | 0.6460      | 4.28     |
| H(9)  | 0.0945      | 0.3086      | 1.3002      | 4.06     |
| H(10) | 0.2990      | 0.3148      | 1.3080      | 4.06     |
| H(11) | 0.2105      | 0.2624      | 1.4004      | 4.06     |
| H(12) | -0.0577     | 0.0017      | 1.1741      | 5.03     |
| H(13) | -0.0157     | 0.0316      | 1.3082      | 5.01     |
| H(14) | 0.1144      | -0.0246     | 1.2515      | 5.04     |
| H(15) | 0.3168      | 0.0151      | 0.5883      | 7.15     |
| H(16) | 0.3374      | 0.0618      | 0.4686      | 7.13     |
| H(17) | 0.2168      | 0.0934      | 0.5641      | 7.13     |

$$B_{eq} = 8/3 \pi^2 (U_{11}(aa^*)^2 + U_{22}(bb^*)^2 + U_{33}(cc^*)^2 + 2U_{12}(aa^*bb^*)\cos \gamma + 2U_{13}(aa^*cc^*)\cos \beta + 2U_{23}(bb^*cc^*)\cos \alpha)$$

Table 2. Anisotropic displacement parameters

| atom  | U <sub>11</sub> | U <sub>22</sub> | U <sub>33</sub> | U <sub>12</sub> | U <sub>13</sub> | U <sub>23</sub> |
|-------|-----------------|-----------------|-----------------|-----------------|-----------------|-----------------|
| S(1)  | 0.0410(5)       | 0.0240(4)       | 0.0358(5)       | 0.0005(4)       | 0.0070(4)       | 0.0026(4)       |
| O(2)  | 0.0382(13)      | 0.0366(12)      | 0.0422(15)      | 0.0100(10)      | -0.0047(11)     | 0.0081(11)      |
| O(3)  | 0.0685(16)      | 0.0242(11)      | 0.0409(16)      | -0.0071(10)     | 0.0149(12)      | -0.0051(11)     |
| N(4)  | 0.0443(17)      | 0.0195(13)      | 0.0273(19)      | -0.0023(12)     | 0.0132(14)      | -0.0025(13)     |
| N(5)  | 0.0442(18)      | 0.0351(15)      | 0.0293(19)      | 0.0038(14)      | 0.0086(14)      | -0.0028(14)     |
| N(6)  | 0.0450(18)      | 0.0304(15)      | 0.037(2)        | -0.0048(13)     | 0.0137(15)      | 0.0034(13)      |
| C(7)  | 0.030(2)        | 0.0238(17)      | 0.025(2)        | 0.0010(14)      | 0.0068(16)      | -0.0005(16)     |
| C(8)  | 0.047(2)        | 0.0193(19)      | 0.036(2)        | -0.0010(16)     | 0.0038(19)      | -0.0088(18)     |
| C(9)  | 0.038(2)        | 0.0176(18)      | 0.041(2)        | -0.0004(16)     | 0.0035(19)      | 0.0037(18)      |
| C(10) | 0.0293(18)      | 0.0230(17)      | 0.030(2)        | 0.0001(14)      | 0.0019(16)      | 0.0055(16)      |
| C(11) | 0.0221(19)      | 0.0318(18)      | 0.024(2)        | 0.0008(14)      | 0.0014(16)      | -0.0026(17)     |
| C(12) | 0.037(2)        | 0.0285(18)      | 0.031(2)        | 0.0002(15)      | 0.0064(18)      | 0.0034(17)      |
| C(13) | 0.072(2)        | 0.039(2)        | 0.042(2)        | 0.0057(18)      | 0.021(2)        | 0.0058(19)      |
| C(14) | 0.064(2)        | 0.040(2)        | 0.031(2)        | 0.0072(19)      | 0.025(2)        | 0.0034(17)      |
| C(15) | 0.0279(19)      | 0.0180(16)      | 0.034(2)        | -0.0019(13)     | 0.0024(16)      | 0.0019(15)      |
| C(16) | 0.031(2)        | 0.0306(19)      | 0.033(2)        | 0.0088(15)      | -0.0003(17)     | -0.0007(17)     |
| C(17) | 0.058(2)        | 0.040(2)        | 0.030(2)        | 0.0037(17)      | 0.0148(18)      | -0.0058(17)     |
| C(18) | 0.037(2)        | 0.0345(19)      | 0.025(2)        | 0.0001(16)      | 0.0121(17)      | -0.0006(17)     |
| C(19) | 0.056(2)        | 0.043(2)        | 0.058(2)        | -0.0147(19)     | 0.021(2)        | 0.0078(19)      |
| C(20) | 0.059(2)        | 0.105(3)        | 0.062(3)        | 0.022(2)        | -0.012(2)       | -0.049(2)       |

The general temperature factor expression:  $\exp(-2\pi^2(a^2U_{11}h^2 + b^2U_{22}k^2 + c^2U_{33}l^2 + 2a*b*U_{12}hk + 2a*c*U_{13}hl + 2b*c*U_{23}kl))$

Table 3. Bond lengths (Å)

| atom  | atom  | distance | atom  | atom  | distance |
|-------|-------|----------|-------|-------|----------|
| S(1)  | O(2)  | 1.432(2) | S(1)  | O(3)  | 1.440(2) |
| S(1)  | N(6)  | 1.656(2) | S(1)  | C(15) | 1.734(2) |
| N(4)  | C(7)  | 1.372(3) | N(4)  | C(18) | 1.385(4) |
| N(4)  | H(3)  | 0.950    | N(5)  | N(6)  | 1.415(3) |
| N(5)  | C(16) | 1.299(3) | N(6)  | C(19) | 1.463(3) |
| C(7)  | C(10) | 1.412(4) | C(7)  | C(15) | 1.390(4) |
| C(8)  | C(9)  | 1.363(5) | C(8)  | C(11) | 1.403(4) |
| C(8)  | H(2)  | 0.90(2)  | C(9)  | C(10) | 1.402(4) |
| C(9)  | H(1)  | 0.94(2)  | C(10) | C(12) | 1.426(4) |
| C(11) | C(15) | 1.408(4) | C(11) | C(16) | 1.465(4) |
| C(12) | C(13) | 1.489(4) | C(12) | C(18) | 1.371(4) |
| C(13) | H(4)  | 0.950    | C(13) | H(5)  | 0.950    |
| C(13) | H(6)  | 0.950    | C(14) | C(18) | 1.498(4) |
| C(14) | C(20) | 1.542(4) | C(14) | H(7)  | 0.950    |
| C(14) | H(8)  | 0.950    | C(16) | C(17) | 1.501(4) |
| C(17) | H(9)  | 0.950    | C(17) | H(10) | 0.950    |
| C(17) | H(11) | 0.950    | C(19) | H(12) | 0.950    |
| C(19) | H(13) | 0.950    | C(19) | H(14) | 0.950    |
| C(20) | H(15) | 0.950    | C(20) | H(16) | 0.950    |
| C(20) | H(17) | 0.950    |       |       |          |

Table 4. Bond angles (°)

| atom  | atom  | atom  | angle      | atom  | atom  | atom  | angle      |
|-------|-------|-------|------------|-------|-------|-------|------------|
| O(2)  | S(1)  | O(3)  | 116.59(11) | O(2)  | S(1)  | N(6)  | 112.03(12) |
| O(2)  | S(1)  | C(15) | 109.86(12) | O(3)  | S(1)  | N(6)  | 107.60(12) |
| O(3)  | S(1)  | C(15) | 111.49(13) | N(6)  | S(1)  | C(15) | 97.65(13)  |
| C(7)  | N(4)  | C(18) | 108.7(2)   | C(7)  | N(4)  | H(3)  | 125.6      |
| C(18) | N(4)  | H(3)  | 125.7      | N(6)  | N(5)  | C(16) | 117.6(2)   |
| S(1)  | N(6)  | N(5)  | 116.87(18) | S(1)  | N(6)  | C(19) | 118.06(18) |
| N(5)  | N(6)  | C(19) | 113.2(2)   | N(4)  | C(7)  | C(10) | 107.7(2)   |
| N(4)  | C(7)  | C(15) | 131.5(2)   | C(10) | C(7)  | C(15) | 120.8(2)   |
| C(9)  | C(8)  | C(11) | 121.5(3)   | C(9)  | C(8)  | H(2)  | 119.9(15)  |
| C(11) | C(8)  | H(2)  | 118.0(15)  | C(8)  | C(9)  | C(10) | 120.7(2)   |
| C(8)  | C(9)  | H(1)  | 120.3(16)  | C(10) | C(9)  | H(1)  | 119.0(16)  |
| C(7)  | C(10) | C(9)  | 118.5(3)   | C(7)  | C(10) | C(12) | 107.2(2)   |
| C(9)  | C(10) | C(12) | 134.3(2)   | C(8)  | C(11) | C(15) | 118.8(3)   |
| C(8)  | C(11) | C(16) | 121.9(2)   | C(15) | C(11) | C(16) | 119.2(2)   |
| C(10) | C(12) | C(13) | 125.8(2)   | C(10) | C(12) | C(18) | 106.8(2)   |
| C(13) | C(12) | C(18) | 127.4(3)   | C(12) | C(13) | H(4)  | 109.2      |
| C(12) | C(13) | H(5)  | 111.2      | C(12) | C(13) | H(6)  | 108.0      |
| H(4)  | C(13) | H(5)  | 109.5      | H(4)  | C(13) | H(6)  | 109.5      |
| H(5)  | C(13) | H(6)  | 109.5      | C(18) | C(14) | C(20) | 113.0(2)   |
| C(18) | C(14) | H(7)  | 109.0      | C(18) | C(14) | H(8)  | 108.1      |
| C(20) | C(14) | H(7)  | 108.1      | C(20) | C(14) | H(8)  | 109.1      |
| H(7)  | C(14) | H(8)  | 109.5      | S(1)  | C(15) | C(7)  | 122.5(2)   |
| S(1)  | C(15) | C(11) | 117.7(2)   | C(7)  | C(15) | C(11) | 119.7(2)   |
| N(5)  | C(16) | C(11) | 125.0(2)   | N(5)  | C(16) | C(17) | 115.0(2)   |
| C(11) | C(16) | C(17) | 119.9(2)   | C(16) | C(17) | H(9)  | 107.9      |
| C(16) | C(17) | H(10) | 110.4      | C(16) | C(17) | H(11) | 110.1      |
| H(9)  | C(17) | H(10) | 109.5      | H(9)  | C(17) | H(11) | 109.5      |
| H(10) | C(17) | H(11) | 109.5      | N(4)  | C(18) | C(12) | 109.6(2)   |
| N(4)  | C(18) | C(14) | 119.9(2)   | C(12) | C(18) | C(14) | 130.4(2)   |
| N(6)  | C(19) | H(12) | 108.4      | N(6)  | C(19) | H(13) | 109.8      |
| N(6)  | C(19) | H(14) | 110.2      | H(12) | C(19) | H(13) | 109.5      |
| H(12) | C(19) | H(14) | 109.5      | H(13) | C(19) | H(14) | 109.5      |
| C(14) | C(20) | H(15) | 108.9      | C(14) | C(20) | H(16) | 109.3      |
| C(14) | C(20) | H(17) | 110.2      | H(15) | C(20) | H(16) | 109.5      |
| H(15) | C(20) | H(17) | 109.5      | H(16) | C(20) | H(17) | 109.5      |

Table 5. Torsion Angles( $^{\circ}$ )

| atom1 | atom2 | atom3 | atom4 | angle       | atom1 | atom2 | atom3 | atom4 | angle     |
|-------|-------|-------|-------|-------------|-------|-------|-------|-------|-----------|
| O(2)  | S(1)  | N(6)  | N(5)  | 58.5(2)     | O(2)  | S(1)  | N(6)  | C(19) | -81.9(2)  |
| O(2)  | S(1)  | C(15) | C(7)  | 98.4(2)     | O(2)  | S(1)  | C(15) | C(11) | -79.3(2)  |
| O(3)  | S(1)  | N(6)  | N(5)  | -172.10(18) | O(3)  | S(1)  | N(6)  | C(19) | 47.5(2)   |
| O(3)  | S(1)  | C(15) | C(7)  | -32.4(2)    | O(3)  | S(1)  | C(15) | C(11) | 149.9(2)  |
| N(6)  | S(1)  | C(15) | C(7)  | -144.8(2)   | N(6)  | S(1)  | C(15) | C(11) | 37.5(2)   |
| C(15) | S(1)  | N(6)  | N(5)  | -56.6(2)    | C(15) | S(1)  | N(6)  | C(19) | 163.0(2)  |
| C(7)  | N(4)  | C(18) | C(12) | 0.2(2)      | C(7)  | N(4)  | C(18) | C(14) | -177.8(2) |
| C(18) | N(4)  | C(7)  | C(10) | -0.1(2)     | C(18) | N(4)  | C(7)  | C(15) | 179.9(2)  |
| N(6)  | N(5)  | C(16) | C(11) | -1.1(4)     | N(6)  | N(5)  | C(16) | C(17) | 176.9(2)  |
| C(16) | N(5)  | N(6)  | S(1)  | 43.5(3)     | C(16) | N(5)  | N(6)  | C(19) | -174.3(2) |
| N(4)  | C(7)  | C(10) | C(9)  | -179.9(2)   | N(4)  | C(7)  | C(10) | C(12) | 0.1(2)    |
| N(4)  | C(7)  | C(15) | S(1)  | 3.1(4)      | N(4)  | C(7)  | C(15) | C(11) | -179.2(2) |
| C(10) | C(7)  | C(15) | S(1)  | -176.8(2)   | C(10) | C(7)  | C(15) | C(11) | 0.9(4)    |
| C(15) | C(7)  | C(10) | C(9)  | 0.1(3)      | C(15) | C(7)  | C(10) | C(12) | -180.0(2) |
| C(9)  | C(8)  | C(11) | C(15) | 1.2(4)      | C(9)  | C(8)  | C(11) | C(16) | -175.5(2) |
| C(11) | C(8)  | C(9)  | C(10) | -0.3(4)     | C(8)  | C(9)  | C(10) | C(7)  | -0.4(4)   |
| C(8)  | C(9)  | C(10) | C(12) | 179.7(3)    | C(7)  | C(10) | C(12) | C(13) | -179.0(2) |
| C(7)  | C(10) | C(12) | C(18) | 0.0(2)      | C(9)  | C(10) | C(12) | C(13) | 0.9(5)    |
| C(9)  | C(10) | C(12) | C(18) | 180(179)    | C(8)  | C(11) | C(15) | S(1)  | 176.3(2)  |
| C(8)  | C(11) | C(15) | C(7)  | -1.5(4)     | C(8)  | C(11) | C(16) | N(5)  | 159.4(2)  |
| C(8)  | C(11) | C(16) | C(17) | -18.4(4)    | C(15) | C(11) | C(16) | N(5)  | -17.3(4)  |
| C(15) | C(11) | C(16) | C(17) | 164.9(2)    | C(16) | C(11) | C(15) | S(1)  | -6.9(3)   |
| C(16) | C(11) | C(15) | C(7)  | 175.3(2)    | C(10) | C(12) | C(18) | N(4)  | -0.1(2)   |
| C(10) | C(12) | C(18) | C(14) | 177.5(2)    | C(13) | C(12) | C(18) | N(4)  | 178.9(2)  |
| C(13) | C(12) | C(18) | C(14) | -3.4(5)     | C(20) | C(14) | C(18) | N(4)  | 69.9(3)   |
| C(20) | C(14) | C(18) | C(12) | -107.6(3)   |       |       |       |       |           |

The sign is positive if when looking from atom 2 to atom 3 a clock-wise motion of atom 1 would superimpose it on atom 4.



Table 6. Distances beyond the asymmetric unit out to 3.60 Å

| atom  | atom                | distance | atom  | atom                | distance |
|-------|---------------------|----------|-------|---------------------|----------|
| S(1)  | H(3) <sup>11</sup>  | 3.170    | O(2)  | O(3) <sup>11</sup>  | 3.534(2) |
| O(2)  | N(4) <sup>11</sup>  | 3.122(2) | O(2)  | C(14) <sup>11</sup> | 3.494(3) |
| O(2)  | C(17) <sup>21</sup> | 3.584(3) | O(2)  | H(2) <sup>21</sup>  | 3.23(2)  |
| O(2)  | H(3) <sup>11</sup>  | 2.295    | O(2)  | H(8) <sup>11</sup>  | 2.839    |
| O(2)  | H(9) <sup>21</sup>  | 2.788    | O(2)  | H(10) <sup>21</sup> | 3.574    |
| O(2)  | H(15) <sup>11</sup> | 3.069    | O(2)  | H(16) <sup>31</sup> | 3.253    |
| O(3)  | O(2) <sup>11</sup>  | 3.534(2) | O(3)  | C(9) <sup>41</sup>  | 3.504(3) |
| O(3)  | C(19) <sup>51</sup> | 3.373(3) | O(3)  | H(1) <sup>41</sup>  | 2.78(2)  |
| O(3)  | H(2) <sup>41</sup>  | 3.18(2)  | O(3)  | H(3) <sup>11</sup>  | 3.134    |
| O(3)  | H(12) <sup>51</sup> | 2.459    | N(4)  | O(2) <sup>11</sup>  | 3.122(2) |
| N(4)  | H(1) <sup>21</sup>  | 3.46(2)  | N(4)  | H(6) <sup>61</sup>  | 3.322    |
| N(4)  | H(12) <sup>51</sup> | 3.256    | N(5)  | C(8) <sup>61</sup>  | 3.481(4) |
| N(5)  | C(20) <sup>31</sup> | 3.581(4) | N(5)  | H(2) <sup>61</sup>  | 3.12(2)  |
| N(5)  | H(9) <sup>21</sup>  | 3.536    | N(5)  | H(10) <sup>61</sup> | 2.718    |
| N(5)  | H(16) <sup>31</sup> | 2.940    | N(5)  | H(17) <sup>31</sup> | 3.355    |
| N(6)  | C(8) <sup>61</sup>  | 3.469(3) | N(6)  | H(2) <sup>61</sup>  | 3.00(2)  |
| N(6)  | H(10) <sup>61</sup> | 3.392    | N(6)  | H(16) <sup>31</sup> | 3.344    |
| C(7)  | C(8) <sup>21</sup>  | 3.483(4) | C(7)  | H(6) <sup>61</sup>  | 3.413    |
| C(8)  | N(5) <sup>21</sup>  | 3.481(4) | C(8)  | N(6) <sup>21</sup>  | 3.469(3) |
| C(8)  | C(7) <sup>61</sup>  | 3.483(4) | C(8)  | C(16) <sup>21</sup> | 3.541(4) |
| C(9)  | O(3) <sup>71</sup>  | 3.504(3) | C(10) | C(12) <sup>61</sup> | 3.549(3) |
| C(10) | H(6) <sup>61</sup>  | 3.498    | C(11) | C(16) <sup>21</sup> | 3.597(3) |
| C(11) | H(9) <sup>21</sup>  | 3.133    | C(12) | C(10) <sup>21</sup> | 3.549(3) |
| C(12) | H(5) <sup>61</sup>  | 3.139    | C(12) | H(6) <sup>61</sup>  | 3.464    |
| C(13) | H(4) <sup>21</sup>  | 3.572    | C(13) | H(5) <sup>61</sup>  | 3.409    |
| C(13) | H(7) <sup>61</sup>  | 3.480    | C(13) | H(11) <sup>81</sup> | 3.294    |
| C(13) | H(14) <sup>71</sup> | 3.268    | C(13) | H(17) <sup>21</sup> | 3.010    |
| C(14) | O(2) <sup>11</sup>  | 3.494(3) | C(14) | H(4) <sup>21</sup>  | 3.119    |
| C(14) | H(14) <sup>11</sup> | 3.548    | C(14) | H(15) <sup>91</sup> | 3.563    |
| C(14) | H(16) <sup>91</sup> | 3.413    | C(15) | H(2) <sup>21</sup>  | 3.57(2)  |
| C(15) | H(9) <sup>21</sup>  | 3.455    | C(16) | C(8) <sup>61</sup>  | 3.541(4) |
| C(16) | C(11) <sup>61</sup> | 3.597(3) | C(16) | H(2) <sup>61</sup>  | 3.51(2)  |
| C(16) | H(9) <sup>21</sup>  | 3.028    | C(16) | H(10) <sup>61</sup> | 3.297    |
| C(17) | O(2) <sup>61</sup>  | 3.584(3) | C(17) | H(4) <sup>31</sup>  | 3.330    |
| C(17) | H(7) <sup>101</sup> | 3.357    | C(17) | H(9) <sup>21</sup>  | 3.374    |
| C(17) | H(10) <sup>61</sup> | 3.469    | C(18) | H(1) <sup>21</sup>  | 3.51(2)  |
| C(18) | H(4) <sup>21</sup>  | 3.546    | C(18) | H(5) <sup>61</sup>  | 3.354    |

Table 6. Distances beyond the asymmetric unit out to 3.60 Å (continued)

| atom  | atom                 | distance | atom  | atom                 | distance |
|-------|----------------------|----------|-------|----------------------|----------|
| C(18) | H(6) <sup>6j</sup>   | 3.348    | C(19) | O(3) <sup>5j</sup>   | 3.373(3) |
| C(19) | H(1) <sup>4j</sup>   | 3.31(2)  | C(19) | H(2) <sup>6j</sup>   | 3.35(2)  |
| C(19) | H(3) <sup>5j</sup>   | 3.565    | C(19) | H(6) <sup>4j</sup>   | 3.100    |
| C(19) | H(8) <sup>1j</sup>   | 3.499    | C(19) | H(10) <sup>6j</sup>  | 3.518    |
| C(19) | H(15) <sup>5j</sup>  | 3.488    | C(19) | H(16) <sup>3j</sup>  | 3.351    |
| C(19) | H(17) <sup>5j</sup>  | 3.588    | C(20) | N(5) <sup>8j</sup>   | 3.581(4) |
| C(20) | H(5) <sup>6j</sup>   | 3.465    | C(20) | H(6) <sup>6j</sup>   | 3.522    |
| C(20) | H(8) <sup>9j</sup>   | 3.368    | C(20) | H(13) <sup>8j</sup>  | 3.573    |
| C(20) | H(13) <sup>5j</sup>  | 3.346    | C(20) | H(15) <sup>9j</sup>  | 3.559    |
| C(20) | H(16) <sup>9j</sup>  | 3.411    | H(1)  | O(3) <sup>7j</sup>   | 2.78(2)  |
| H(1)  | N(4) <sup>6j</sup>   | 3.46(2)  | H(1)  | C(18) <sup>6j</sup>  | 3.51(2)  |
| H(1)  | C(19) <sup>7j</sup>  | 3.31(2)  | H(1)  | H(8) <sup>6j</sup>   | 3.581    |
| H(1)  | H(12) <sup>7j</sup>  | 3.114    | H(1)  | H(14) <sup>7j</sup>  | 2.697    |
| H(2)  | O(2) <sup>6j</sup>   | 3.23(2)  | H(2)  | O(3) <sup>7j</sup>   | 3.18(2)  |
| H(2)  | N(5) <sup>2j</sup>   | 3.12(2)  | H(2)  | N(6) <sup>2j</sup>   | 3.00(2)  |
| H(2)  | C(15) <sup>6j</sup>  | 3.57(2)  | H(2)  | C(16) <sup>2j</sup>  | 3.51(2)  |
| H(2)  | C(19) <sup>2j</sup>  | 3.35(2)  | H(2)  | H(12) <sup>2j</sup>  | 3.047    |
| H(2)  | H(13) <sup>2j</sup>  | 3.389    | H(3)  | S(1) <sup>1j</sup>   | 3.170    |
| H(3)  | O(2) <sup>1j</sup>   | 2.295    | H(3)  | O(3) <sup>1j</sup>   | 3.134    |
| H(3)  | C(19) <sup>5j</sup>  | 3.565    | H(3)  | H(12) <sup>5j</sup>  | 2.780    |
| H(3)  | H(13) <sup>5j</sup>  | 3.566    | H(4)  | C(13) <sup>6j</sup>  | 3.572    |
| H(4)  | C(14) <sup>6j</sup>  | 3.119    | H(4)  | C(17) <sup>8j</sup>  | 3.330    |
| H(4)  | C(18) <sup>6j</sup>  | 3.546    | H(4)  | H(5) <sup>6j</sup>   | 2.791    |
| H(4)  | H(7) <sup>6j</sup>   | 2.579    | H(4)  | H(8) <sup>6j</sup>   | 2.970    |
| H(4)  | H(10) <sup>8j</sup>  | 3.310    | H(4)  | H(11) <sup>8j</sup>  | 2.572    |
| H(4)  | H(14) <sup>7j</sup>  | 3.214    | H(4)  | H(17) <sup>2j</sup>  | 3.353    |
| H(5)  | C(12) <sup>2j</sup>  | 3.139    | H(5)  | C(13) <sup>2j</sup>  | 3.409    |
| H(5)  | C(18) <sup>2j</sup>  | 3.354    | H(5)  | C(20) <sup>2j</sup>  | 3.465    |
| H(5)  | H(4) <sup>2j</sup>   | 2.791    | H(5)  | H(11) <sup>8j</sup>  | 3.239    |
| H(5)  | H(11) <sup>11j</sup> | 2.820    | H(5)  | H(17) <sup>2j</sup>  | 2.593    |
| H(6)  | N(4) <sup>2j</sup>   | 3.322    | H(6)  | C(7) <sup>2j</sup>   | 3.413    |
| H(6)  | C(10) <sup>2j</sup>  | 3.498    | H(6)  | C(12) <sup>2j</sup>  | 3.464    |
| H(6)  | C(18) <sup>2j</sup>  | 3.348    | H(6)  | C(19) <sup>7j</sup>  | 3.100    |
| H(6)  | C(20) <sup>2j</sup>  | 3.522    | H(6)  | H(8) <sup>6j</sup>   | 3.549    |
| H(6)  | H(12) <sup>7j</sup>  | 3.056    | H(6)  | H(13) <sup>7j</sup>  | 3.277    |
| H(6)  | H(14) <sup>7j</sup>  | 2.506    | H(6)  | H(17) <sup>2j</sup>  | 2.663    |
| H(7)  | C(13) <sup>2j</sup>  | 3.480    | H(7)  | C(17) <sup>11j</sup> | 3.357    |

Table 6. Distances beyond the asymmetric unit out to 3.60 Å (continued)

| atom  | atom                | distance | atom  | atom                 | distance |
|-------|---------------------|----------|-------|----------------------|----------|
| H(7)  | H(4) <sup>2)</sup>  | 2.579    | H(7)  | H(9) <sup>11)</sup>  | 3.069    |
| H(7)  | H(11) <sup>8)</sup> | 3.483    | H(7)  | H(11) <sup>11)</sup> | 2.852    |
| H(7)  | H(15) <sup>9)</sup> | 3.465    | H(8)  | O(2) <sup>1)</sup>   | 2.839    |
| H(8)  | C(19) <sup>1)</sup> | 3.499    | H(8)  | C(20) <sup>9)</sup>  | 3.368    |
| H(8)  | H(1) <sup>2)</sup>  | 3.581    | H(8)  | H(4) <sup>2)</sup>   | 2.970    |
| H(8)  | H(6) <sup>2)</sup>  | 3.549    | H(8)  | H(14) <sup>1)</sup>  | 2.658    |
| H(8)  | H(15) <sup>9)</sup> | 3.148    | H(8)  | H(16) <sup>9)</sup>  | 2.736    |
| H(9)  | O(2) <sup>6)</sup>  | 2.788    | H(9)  | N(5) <sup>6)</sup>   | 3.536    |
| H(9)  | C(11) <sup>6)</sup> | 3.133    | H(9)  | C(15) <sup>6)</sup>  | 3.455    |
| H(9)  | C(16) <sup>6)</sup> | 3.028    | H(9)  | C(17) <sup>6)</sup>  | 3.374    |
| H(9)  | H(7) <sup>10)</sup> | 3.069    | H(9)  | H(10) <sup>6)</sup>  | 3.092    |
| H(9)  | H(11) <sup>6)</sup> | 3.439    | H(9)  | H(16) <sup>10)</sup> | 3.583    |
| H(10) | O(2) <sup>6)</sup>  | 3.574    | H(10) | N(5) <sup>2)</sup>   | 2.718    |
| H(10) | N(6) <sup>2)</sup>  | 3.392    | H(10) | C(16) <sup>2)</sup>  | 3.297    |
| H(10) | C(17) <sup>2)</sup> | 3.469    | H(10) | C(19) <sup>2)</sup>  | 3.518    |
| H(10) | H(4) <sup>3)</sup>  | 3.310    | H(10) | H(9) <sup>2)</sup>   | 3.092    |
| H(10) | H(11) <sup>2)</sup> | 3.453    | H(10) | H(13) <sup>2)</sup>  | 2.985    |
| H(11) | C(13) <sup>3)</sup> | 3.294    | H(11) | H(4) <sup>3)</sup>   | 2.572    |
| H(11) | H(5) <sup>3)</sup>  | 3.239    | H(11) | H(5) <sup>10)</sup>  | 2.820    |
| H(11) | H(7) <sup>3)</sup>  | 3.483    | H(11) | H(7) <sup>10)</sup>  | 2.852    |
| H(11) | H(9) <sup>2)</sup>  | 3.439    | H(11) | H(10) <sup>6)</sup>  | 3.453    |
| H(11) | H(17) <sup>3)</sup> | 3.399    | H(12) | O(3) <sup>5)</sup>   | 2.459    |
| H(12) | N(4) <sup>5)</sup>  | 3.256    | H(12) | H(1) <sup>4)</sup>   | 3.114    |
| H(12) | H(2) <sup>6)</sup>  | 3.047    | H(12) | H(3) <sup>5)</sup>   | 2.780    |
| H(12) | H(6) <sup>4)</sup>  | 3.056    | H(12) | H(15) <sup>5)</sup>  | 3.418    |
| H(12) | H(17) <sup>5)</sup> | 3.598    | H(13) | C(20) <sup>3)</sup>  | 3.573    |
| H(13) | C(20) <sup>5)</sup> | 3.346    | H(13) | H(2) <sup>6)</sup>   | 3.389    |
| H(13) | H(3) <sup>5)</sup>  | 3.566    | H(13) | H(6) <sup>4)</sup>   | 3.277    |
| H(13) | H(10) <sup>6)</sup> | 2.985    | H(13) | H(15) <sup>5)</sup>  | 2.769    |
| H(13) | H(16) <sup>3)</sup> | 3.097    | H(13) | H(17) <sup>3)</sup>  | 3.323    |
| H(13) | H(17) <sup>5)</sup> | 3.046    | H(14) | C(13) <sup>4)</sup>  | 3.268    |
| H(14) | C(14) <sup>1)</sup> | 3.548    | H(14) | H(1) <sup>4)</sup>   | 2.697    |
| H(14) | H(4) <sup>4)</sup>  | 3.214    | H(14) | H(6) <sup>4)</sup>   | 2.506    |
| H(14) | H(8) <sup>1)</sup>  | 2.658    | H(14) | H(16) <sup>3)</sup>  | 3.141    |
| H(14) | H(17) <sup>5)</sup> | 3.574    | H(15) | O(2) <sup>1)</sup>   | 3.069    |
| H(15) | C(14) <sup>9)</sup> | 3.563    | H(15) | C(19) <sup>5)</sup>  | 3.488    |
| H(15) | C(20) <sup>9)</sup> | 3.559    | H(15) | H(7) <sup>9)</sup>   | 3.465    |

Table 6. Distances beyond the asymmetric unit out to 3.60 Å (continued)

| atom  | atom                | distance | atom  | atom                | distance |
|-------|---------------------|----------|-------|---------------------|----------|
| H(15) | H(8) <sup>9j</sup>  | 3.148    | H(15) | H(12) <sup>5j</sup> | 3.418    |
| H(15) | H(13) <sup>5j</sup> | 2.769    | H(15) | H(15) <sup>9j</sup> | 3.576    |
| H(15) | H(16) <sup>9j</sup> | 3.057    | H(16) | O(2) <sup>8j</sup>  | 3.253    |
| H(16) | N(5) <sup>8j</sup>  | 2.940    | H(16) | N(6) <sup>8j</sup>  | 3.344    |
| H(16) | C(14) <sup>9j</sup> | 3.413    | H(16) | C(19) <sup>8j</sup> | 3.351    |
| H(16) | C(20) <sup>9j</sup> | 3.411    | H(16) | H(8) <sup>9j</sup>  | 2.736    |
| H(16) | H(9) <sup>11j</sup> | 3.583    | H(16) | H(13) <sup>8j</sup> | 3.097    |
| H(16) | H(14) <sup>8j</sup> | 3.141    | H(16) | H(15) <sup>9j</sup> | 3.057    |
| H(16) | H(16) <sup>9j</sup> | 3.274    | H(17) | N(5) <sup>8j</sup>  | 3.355    |
| H(17) | C(13) <sup>6j</sup> | 3.010    | H(17) | C(19) <sup>5j</sup> | 3.588    |
| H(17) | H(4) <sup>6j</sup>  | 3.353    | H(17) | H(5) <sup>6j</sup>  | 2.593    |
| H(17) | H(6) <sup>6j</sup>  | 2.663    | H(17) | H(11) <sup>8j</sup> | 3.399    |
| H(17) | H(12) <sup>5j</sup> | 3.598    | H(17) | H(13) <sup>8j</sup> | 3.323    |
| H(17) | H(13) <sup>5j</sup> | 3.046    | H(17) | H(14) <sup>5j</sup> | 3.574    |

Symmetry Operators:

- |                       |                         |
|-----------------------|-------------------------|
| (1) -X+1,-Y,-Z+2      | (2) X+1/2,-Y+1/2,Z      |
| (3) X,Y,Z+1           | (4) -X+1/2,Y+1/2-1,-Z+2 |
| (5) -X,-Y,-Z+2        | (6) X+1/2-1,-Y+1/2,Z    |
| (7) -X+1/2,Y+1/2,-Z+2 | (8) X,Y,Z-1             |
| (9) -X+1,-Y,-Z+1      | (10) X+1/2-1,-Y+1/2,Z+1 |
| (11) X+1/2,-Y+1/2,Z-1 |                         |

Table 7. Intramolecular and Intermolecular Hydrogen bonds

| D    | H    | A             | D...A    | D-H   | H...A | D-H...A |
|------|------|---------------|----------|-------|-------|---------|
| N(4) | H(3) | O(2)[3:1:0:2] | 3.122(2) | 0.950 | 2.295 | 145.1   |
| N(4) | H(3) | O(3)          | 3.034(3) | 0.950 | 2.486 | 116.6   |

- Note) 1. The symmetry operations are applied to the acceptors.  
2. Estimated standard deviations (esd's) are shown in the parentheses.  
They are not calculated when all atoms have an esd=0.0.
