# Supplementary material for: Thiadiazino-indole, thiadiazino-carbazole and benzothiadiazino-carbazole dioxides: synthesis, physicochemical and early ADME characterization of representatives of new tri-, tetra- and pentacyclic ring systems and their intermediates
Source: publisher site journal article supplement (doi:10.3762/bjoc.21.169), 2025-10-21
Supplement: Additional file 2 [file 3d_xrd.pdf › Átnevezett XRD/3d_xrd.pdf]

**143628**

**PGY0784\_1A**

Submitted by: Pusztai Gyongyver  
Operator: Dancso Andras

X-ray Structure Report

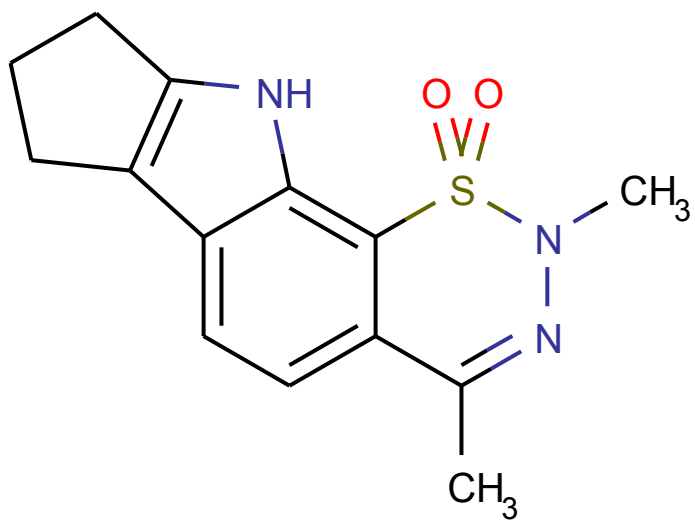

November 26, 2024

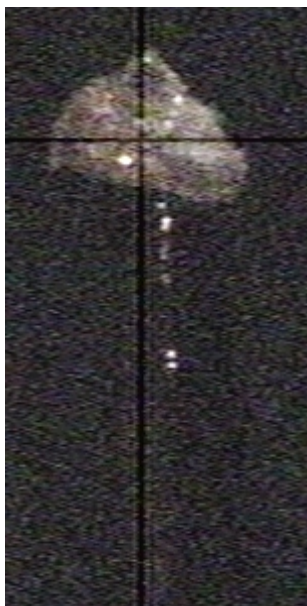

Fig. 1. The crystal

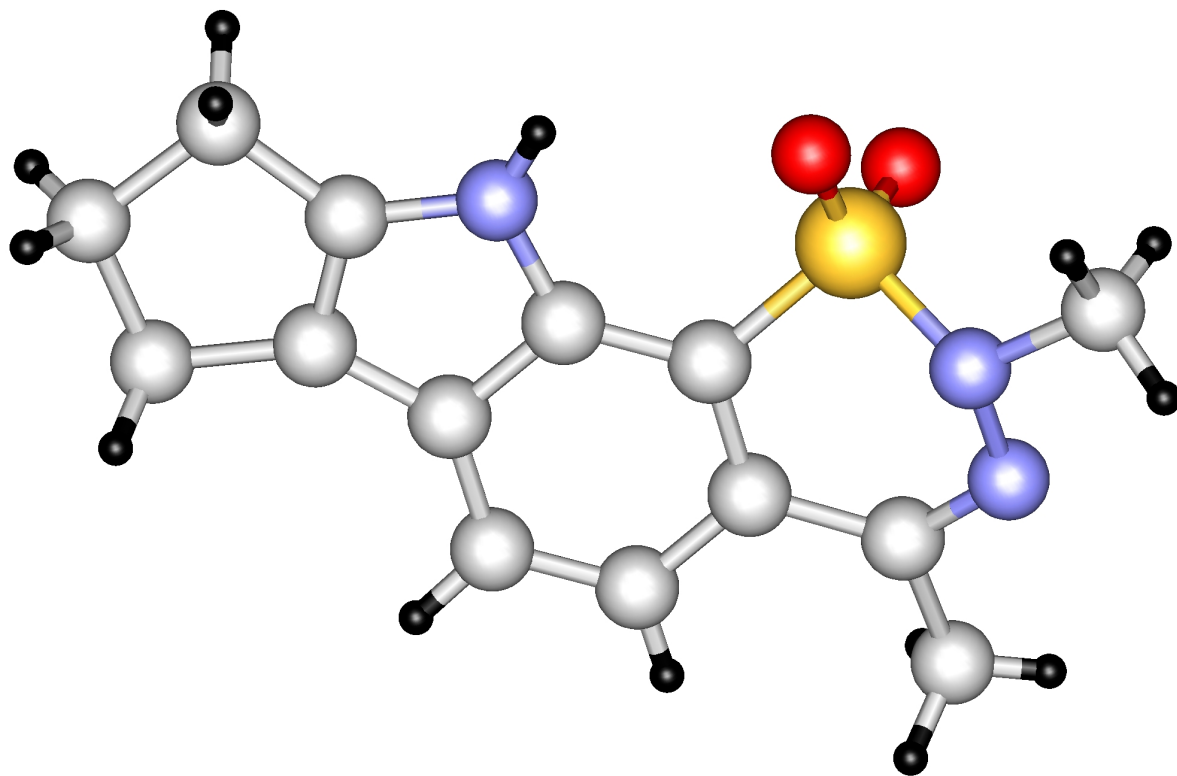

Fig. 2. The molecule

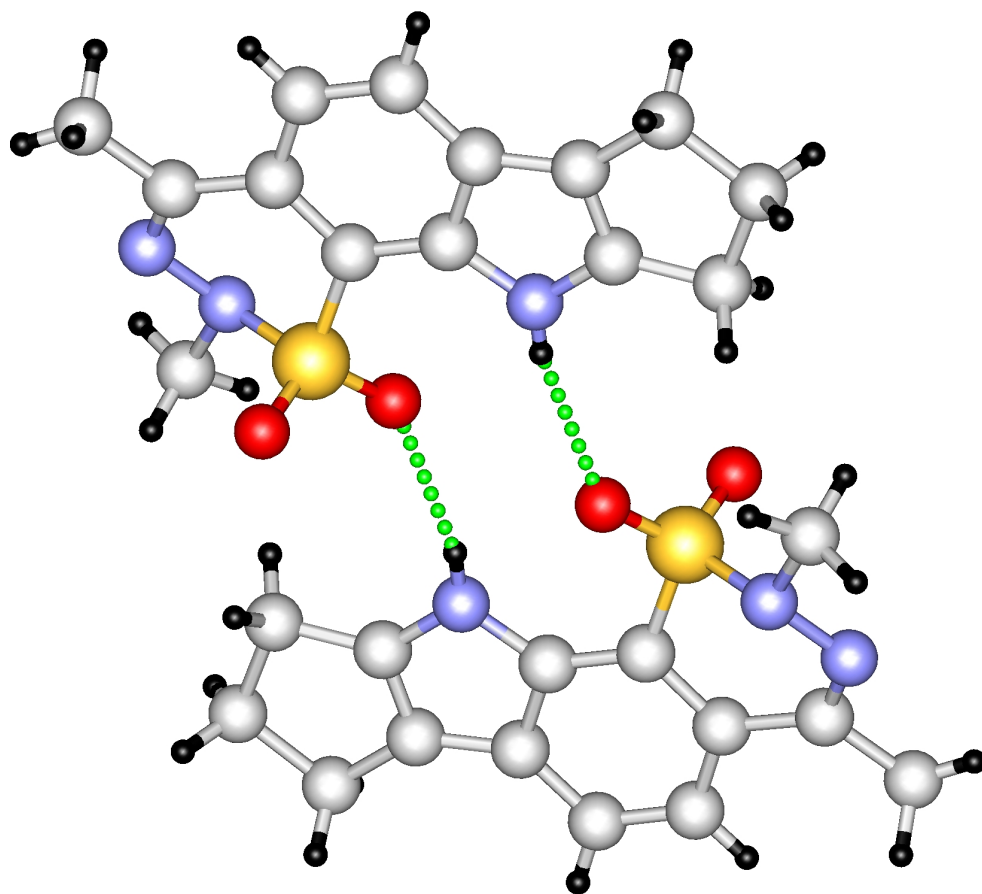

Fig. 3. Hydrogen bonds

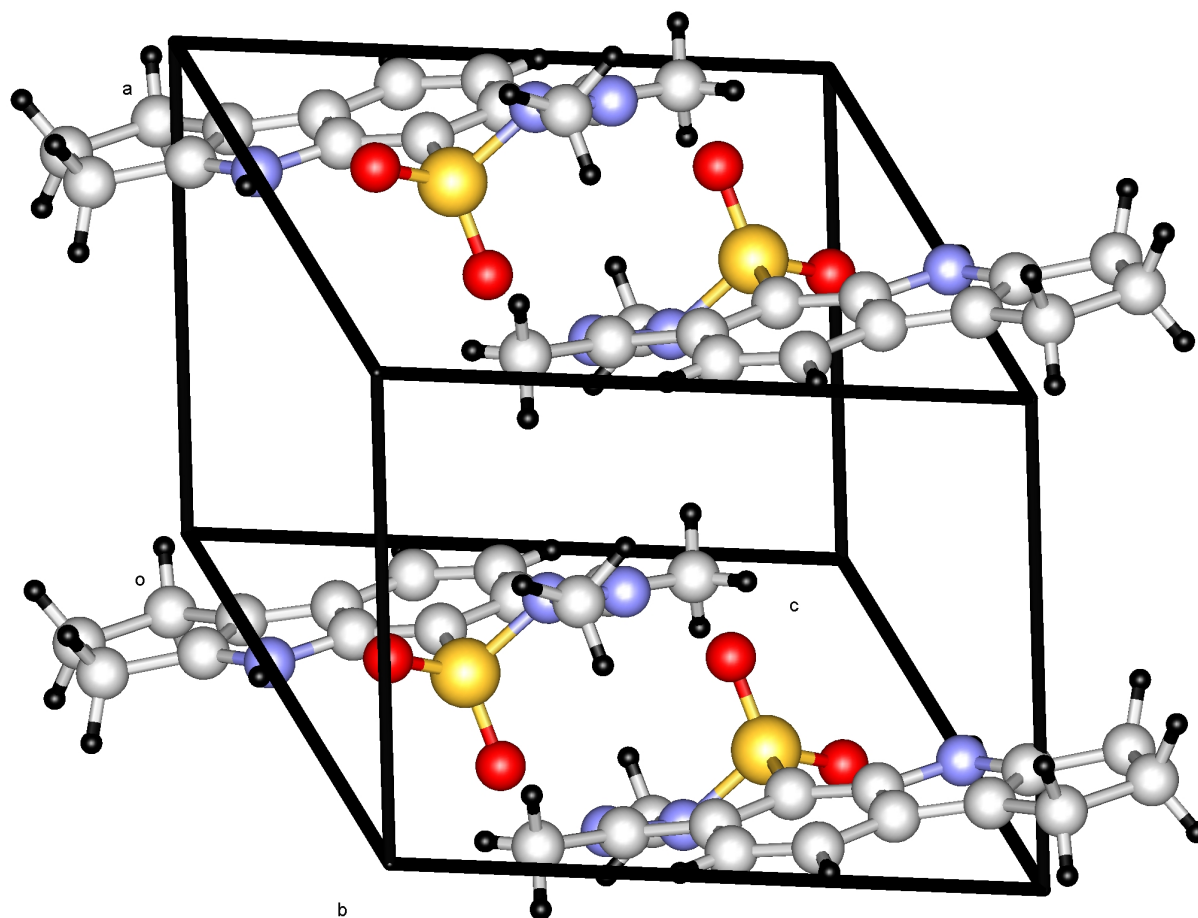

Fig. 4. Packing

## *Experimental*

### Data Collection

A colorless chunk crystal of  $C_{14}H_{15}N_3O_2S$  having approximate dimensions of 0.31 x 0.20 x 0.11 mm was mounted on a cactus needle. All measurements were made on a Rigaku RAXIS RAPID imaging plate area detector with graphite monochromated Cu-K $\alpha$  radiation.

Indexing was performed from 4 oscillations that were exposed for 180 seconds. The crystal-to-detector distance was 127.40 mm.

Cell constants and an orientation matrix for data collection corresponded to a primitive triclinic cell with dimensions:

$$\begin{aligned}a &= 7.4367(4) \text{ \AA} & \alpha &= 100.874(3)^\circ \\b &= 8.3023(4) \text{ \AA} & \beta &= 104.217(3)^\circ \\c &= 12.3159(7) \text{ \AA} & \gamma &= 109.047(3)^\circ \\V &= 666.11(6) \text{ \AA}^3\end{aligned}$$

For  $Z = 2$  and F.W. = 289.35, the calculated density is 1.443 g/cm<sup>3</sup>. Based on a statistical analysis of intensity distribution, and the successful solution and refinement of the structure, the space group was determined to be:

### P-1 (#2)

The data were collected at a temperature of  $20 \pm 1^\circ\text{C}$  to a maximum  $2\theta$  value of  $143.1^\circ$ . A total of 180 oscillation images were collected. A sweep of data was done using  $\omega$  scans from  $20.0$  to  $200.0^\circ$  in  $5.0^\circ$  step, at  $\chi=0.0^\circ$  and  $\phi = 0.0^\circ$ . The exposure rate was 36.0 [sec./ $^\circ$ ]. A second sweep was performed using  $\omega$  scans from  $20.0$  to  $200.0^\circ$  in  $5.0^\circ$  step, at  $\chi=54.0^\circ$  and  $\phi = 0.0^\circ$ . The exposure rate was 36.0 [sec./ $^\circ$ ]. Another sweep was performed using  $\omega$  scans from  $20.0$  to  $200.0^\circ$  in  $5.0^\circ$  step, at  $\chi=54.0^\circ$  and  $\phi = 90.0^\circ$ . The exposure rate was 36.0 [sec./ $^\circ$ ]. Another sweep was performed using  $\omega$  scans from  $20.0$  to  $200.0^\circ$  in  $5.0^\circ$  step, at  $\chi=54.0^\circ$  and  $\phi = 180.0^\circ$ . The exposure rate was 36.0 [sec./ $^\circ$ ]. Another sweep was performed using  $\omega$  scans from  $20.0$  to  $200.0^\circ$  in  $5.0^\circ$  step, at  $\chi=54.0^\circ$  and  $\phi = 270.0^\circ$ . The exposure rate was 36.0 [sec./ $^\circ$ ]. The crystal-to-detector distance was 127.40 mm. Readout was performed in the 0.100 mm pixel mode.

## Data Reduction

Of the 7553 reflections that were collected, 2268 were unique ( $R_{\text{int}} = 0.040$ ).

The linear absorption coefficient,  $\mu$ , for Cu-K $\alpha$  radiation is 22.116 cm<sup>-1</sup>. An empirical absorption correction was applied which resulted in transmission factors ranging from 0.637 to 0.781. The data were corrected for Lorentz and polarization effects.

## Structure Solution and Refinement

The structure was solved by direct methods<sup>1</sup> and expanded using Fourier techniques<sup>2</sup>. The non-hydrogen atoms were refined anisotropically. Hydrogen atoms were refined isotropically. The final cycle of full-matrix least-squares refinement<sup>3</sup> on F was based on 4139 observed reflections ( $I > 2.00\sigma(I)$ ) and 241 variable parameters and converged (largest parameter shift was 0.00 times its esd) with unweighted and weighted agreement factors of:

$$R = \sum ||F_o| - |F_c|| / \sum |F_o| = 0.0337$$

$$R_w = [ \sum w (|F_o| - |F_c|)^2 / \sum w F_o^2 ]^{1/2} = 0.0365$$

The standard deviation of an observation of unit weight<sup>4</sup> was 3.30. Unit weights were used. Plots of  $\sum w (|F_o| - |F_c|)^2$  versus  $|F_o|$ , reflection order in data collection,  $\sin \theta/\lambda$  and various classes of indices showed no unusual trends. The maximum and minimum peaks on the final difference Fourier map corresponded to 0.55 and -1.04 e<sup>-</sup>/Å<sup>3</sup>, respectively.

Neutral atom scattering factors were taken from Cromer and Waber<sup>5</sup>. Anomalous dispersion effects were included in Fcalc<sup>6</sup>; the values for  $\Delta f'$  and  $\Delta f''$  were those of Creagh and McAuley<sup>7</sup>. The values for the mass attenuation coefficients are those of Creagh and Hubbell<sup>8</sup>. All calculations were performed using the CrystalStructure<sup>9,10</sup> crystallographic software package.

## *References*

- (1) SIR92: Altomare, A., Cascarano, G., Giacovazzo, C., Guagliardi, A., Burla, M., Polidori, G., and Camalli, M. (1994) J. Appl. Cryst., 27, 435.
- (2) DIRDIF99: Beurskens, P.T., Admiraal, G., Beurskens, G., Bosman, W.P., de Gelder, R., Israel, R. and Smits, J.M.M.(1999). The DIRDIF-99 program system, Technical Report of the Crystallography Laboratory, University of Nijmegen, The Netherlands.

(3) Least Squares function minimized:

$$\sum w(|F_o| - |F_c|)^2 \quad \text{where } w = \text{Least Squares weights.}$$

(4) Standard deviation of an observation of unit weight:

$$[\sum w(|F_o| - |F_c|)^2 / (N_o - N_v)]^{1/2}$$

where:  $N_o$  = number of observations

$N_v$  = number of variables

(5) Cromer, D. T. & Waber, J. T.; "International Tables for X-ray Crystallography", Vol. IV, The Kynoch Press, Birmingham, England, Table 2.2 A (1974).

(6) Ibers, J. A. & Hamilton, W. C.; Acta Crystallogr., 17, 781 (1964).

(7) Creagh, D. C. & McAuley, W.J. ; "International Tables for Crystallography", Vol C, (A.J.C. Wilson, ed.), Kluwer Academic Publishers, Boston, Table 4.2.6.8, pages 219-222 (1992).

(8) Creagh, D. C. & Hubbell, J.H.; "International Tables for Crystallography", Vol C, (A.J.C. Wilson, ed.), Kluwer Academic Publishers, Boston, Table 4.2.4.3, pages 200-206 (1992).

(9) CrystalStructure 3.7.0: Crystal Structure Analysis Package, Rigaku and Rigaku/MSK (2000-2005). 9009 New Trails Dr. The Woodlands TX 77381 USA.

(10) CRYSTALS Issue 10: Watkin, D.J., Prout, C.K. Carruthers, J.R. & Betteridge, P.W. Chemical Crystallography Laboratory, Oxford, UK. (1996)



## EXPERIMENTAL DETAILS

### A. Crystal Data

|                         |                                                                                                                                                                                                                         |
|-------------------------|-------------------------------------------------------------------------------------------------------------------------------------------------------------------------------------------------------------------------|
| Empirical Formula       | $\text{C}_{14}\text{H}_{15}\text{N}_3\text{O}_2\text{S}$                                                                                                                                                                |
| Formula Weight          | 289.35                                                                                                                                                                                                                  |
| Crystal Color, Habit    | colorless, chunk                                                                                                                                                                                                        |
| Crystal Dimensions      | 0.31 X 0.20 X 0.11 mm                                                                                                                                                                                                   |
| Crystal System          | triclinic                                                                                                                                                                                                               |
| Lattice Type            | Primitive                                                                                                                                                                                                               |
| Indexing Images         | 4 oscillations @ 180.0 seconds                                                                                                                                                                                          |
| Detector Position       | 127.40 mm                                                                                                                                                                                                               |
| Pixel Size              | 0.100 mm                                                                                                                                                                                                                |
| Lattice Parameters      | $a = 7.4367(4) \text{ \AA}$<br>$b = 8.3023(4) \text{ \AA}$<br>$c = 12.3159(7) \text{ \AA}$<br>$\alpha = 100.874(3)^\circ$<br>$\beta = 104.217(3)^\circ$<br>$\gamma = 109.047(3)^\circ$<br>$V = 666.11(6) \text{ \AA}^3$ |
| Space Group             | P-1 (#2)                                                                                                                                                                                                                |
| Z value                 | 2                                                                                                                                                                                                                       |
| $D_{\text{calc}}$       | $1.443 \text{ g/cm}^3$                                                                                                                                                                                                  |
| $F_{000}$               | 304.00                                                                                                                                                                                                                  |
| $\mu(\text{CuK}\alpha)$ | $22.116 \text{ cm}^{-1}$                                                                                                                                                                                                |

## B. Intensity Measurements

|                                                           |                                                                       |
|-----------------------------------------------------------|-----------------------------------------------------------------------|
| Diffractometer                                            | Rigaku RAXIS-RAPID                                                    |
| Radiation                                                 | CuK $\alpha$ ( $\lambda$ = 1.54187 Å)<br>graphite monochromated       |
| Detector Aperture                                         | 280 mm x 256 mm                                                       |
| Data Images                                               | 180 exposures                                                         |
| $\omega$ oscillation Range ( $\chi$ =0.0, $\phi$ =0.0)    | 20.0 - 200.0°                                                         |
| Exposure Rate                                             | 36.0 sec./°                                                           |
| $\omega$ oscillation Range ( $\chi$ =54.0, $\phi$ =0.0)   | 20.0 - 200.0°                                                         |
| Exposure Rate                                             | 36.0 sec./°                                                           |
| $\omega$ oscillation Range ( $\chi$ =54.0, $\phi$ =90.0)  | 20.0 - 200.0°                                                         |
| Exposure Rate                                             | 36.0 sec./°                                                           |
| $\omega$ oscillation Range ( $\chi$ =54.0, $\phi$ =180.0) | 20.0 - 200.0°                                                         |
| Exposure Rate                                             | 36.0 sec./°                                                           |
| $\omega$ oscillation Range ( $\chi$ =54.0, $\phi$ =270.0) | 20.0 - 200.0°                                                         |
| Exposure Rate                                             | 36.0 sec./°                                                           |
| Detector Position                                         | 127.40 mm                                                             |
| Pixel Size                                                | 0.100 mm                                                              |
| $2\theta_{\text{max}}$                                    | 143.1°                                                                |
| No. of Reflections Measured                               | Total: 7553<br>Unique: 2268 ( $R_{\text{int}}$ = 0.040)               |
| Corrections                                               | Lorentz-polarization<br>Absorption<br>(trans. factors: 0.637 - 0.781) |

### C. Structure Solution and Refinement

|                                          |                                |
|------------------------------------------|--------------------------------|
| Structure Solution                       | Direct Methods (SIR92)         |
| Refinement                               | Full-matrix least-squares on F |
| Function Minimized                       | $\Sigma w ( Fo  -  Fc )^2$     |
| Least Squares Weights                    | 1                              |
| $2\theta_{\text{max}}$ cutoff            | 143.1 $^{\circ}$               |
| Anomalous Dispersion                     | All non-hydrogen atoms         |
| No. Observations ( $I > 2.00\sigma(I)$ ) | 4139                           |
| No. Variables                            | 241                            |
| Reflection/Parameter Ratio               | 17.17                          |
| Residuals: R ( $I > 2.00\sigma(I)$ )     | 0.0337                         |
| Residuals: Rw ( $I > 2.00\sigma(I)$ )    | 0.0365                         |
| Goodness of Fit Indicator                | 3.295                          |
| Max Shift/Error in Final Cycle           | 0.000                          |
| Maximum peak in Final Diff. Map          | 0.55 e $^{-}/\text{\AA}^3$     |
| Minimum peak in Final Diff. Map          | -1.04 e $^{-}/\text{\AA}^3$    |

Table 1. Atomic coordinates and  $B_{\text{iso}}/B_{\text{eq}}$

| atom  | x           | y          | z           | $B_{\text{eq}}$ |
|-------|-------------|------------|-------------|-----------------|
| S(1)  | 0.86716(12) | 0.39937(9) | 0.75847(8)  | 3.78(2)         |
| O(2)  | 1.0075(2)   | 0.3287(2)  | 0.72900(16) | 4.84(5)         |
| O(3)  | 0.8493(2)   | 0.4072(2)  | 0.87339(16) | 4.50(5)         |
| N(4)  | 1.1246(3)   | 0.7989(3)  | 0.9390(2)   | 3.43(7)         |
| N(5)  | 0.6378(3)   | 0.2929(2)  | 0.6605(2)   | 3.88(6)         |
| N(6)  | 0.6176(3)   | 0.2911(2)  | 0.5432(2)   | 3.92(7)         |
| C(7)  | 0.9158(4)   | 0.6053(3)  | 0.7333(2)   | 2.83(8)         |
| C(8)  | 0.7136(4)   | 0.4398(3)  | 0.5249(2)   | 3.28(8)         |
| C(9)  | 1.0921(4)   | 0.9307(3)  | 0.7947(2)   | 3.25(8)         |
| C(10) | 1.0188(4)   | 0.9271(4)  | 0.6777(3)   | 3.78(9)         |
| C(11) | 1.2141(4)   | 1.0638(3)  | 0.9018(2)   | 3.30(8)         |
| C(12) | 1.0369(4)   | 0.7636(3)  | 0.8201(2)   | 2.90(8)         |
| C(13) | 0.8457(4)   | 0.6053(3)  | 0.6166(2)   | 3.05(8)         |
| C(14) | 0.9006(4)   | 0.7702(4)  | 0.5912(3)   | 3.72(9)         |
| C(15) | 1.2308(4)   | 0.9811(4)  | 0.9860(2)   | 3.29(8)         |
| C(16) | 1.4213(5)   | 1.2863(4)  | 1.0853(3)   | 4.24(10)        |
| C(17) | 0.6715(6)   | 0.4281(6)  | 0.3971(3)   | 4.51(11)        |
| C(18) | 1.3581(5)   | 1.0996(4)  | 1.1060(3)   | 3.72(9)         |
| C(19) | 1.3338(5)   | 1.2612(4)  | 0.9522(3)   | 4.36(10)        |
| C(20) | 0.5243(7)   | 0.1128(5)  | 0.6666(4)   | 6.04(12)        |
| H(1)  | 1.106(3)    | 0.725(2)   | 0.9773(18)  | 2.2(6)          |
| H(2)  | 1.045(2)    | 1.040(2)   | 0.6605(17)  | 3.1(5)          |
| H(3)  | 0.851(3)    | 0.766(3)   | 0.513(2)    | 3.5(7)          |
| H(4)  | 1.245(4)    | 1.326(3)   | 0.940(2)    | 7.0(9)          |
| H(5)  | 1.448(3)    | 1.298(3)   | 0.917(2)    | 6.9(9)          |
| H(6)  | 1.574(4)    | 1.343(3)   | 1.108(2)    | 7.5(9)          |
| H(7)  | 1.365(3)    | 1.359(3)   | 1.130(2)    | 6.2(8)          |
| H(8)  | 1.276(3)    | 1.087(3)   | 1.161(2)    | 5.4(7)          |
| H(9)  | 1.482(3)    | 1.070(3)   | 1.135(2)    | 5.4(7)          |
| H(10) | 0.507(3)    | 0.130(3)   | 0.747(2)    | 7.1(10)         |
| H(11) | 0.604(5)    | 0.039(5)   | 0.654(3)    | 14.2(18)        |
| H(12) | 0.379(5)    | 0.065(4)   | 0.607(2)    | 11.6(13)        |
| H(13) | 0.605(4)    | 0.318(3)   | 0.349(2)    | 7.4(11)         |
| H(14) | 0.801(4)    | 0.468(3)   | 0.378(2)    | 8.8(11)         |
| H(15) | 0.593(4)    | 0.504(3)   | 0.376(2)    | 8.6(10)         |

$$B_{\text{eq}} = 8/3 \pi^2 (U_{11}(aa^*)^2 + U_{22}(bb^*)^2 + U_{33}(cc^*)^2 + 2U_{12}(aa^*bb^*)\cos \gamma + 2U_{13}(aa^*cc^*)\cos \beta + 2U_{23}(bb^*cc^*)\cos \alpha)$$

Table 2. Anisotropic displacement parameters

| atom  | U <sub>11</sub> | U <sub>22</sub> | U <sub>33</sub> | U <sub>12</sub> | U <sub>13</sub> | U <sub>23</sub> |
|-------|-----------------|-----------------|-----------------|-----------------|-----------------|-----------------|
| S(1)  | 0.0604(6)       | 0.0314(4)       | 0.0457(6)       | 0.0128(4)       | 0.0114(5)       | 0.0149(4)       |
| O(2)  | 0.0701(14)      | 0.0490(12)      | 0.0786(16)      | 0.0378(11)      | 0.0239(12)      | 0.0245(12)      |
| O(3)  | 0.0794(15)      | 0.0422(12)      | 0.0388(14)      | 0.0107(10)      | 0.0141(11)      | 0.0187(11)      |
| N(4)  | 0.0559(18)      | 0.0327(17)      | 0.039(2)        | 0.0125(14)      | 0.0128(15)      | 0.0170(17)      |
| N(5)  | 0.0524(17)      | 0.0364(15)      | 0.0391(18)      | 0.0025(13)      | 0.0047(14)      | 0.0084(15)      |
| N(6)  | 0.0590(17)      | 0.0414(16)      | 0.0351(19)      | 0.0119(13)      | 0.0067(14)      | 0.0074(15)      |
| C(7)  | 0.0396(19)      | 0.0305(18)      | 0.036(2)        | 0.0114(15)      | 0.0125(16)      | 0.0099(19)      |
| C(8)  | 0.042(2)        | 0.040(2)        | 0.041(2)        | 0.0172(17)      | 0.0125(18)      | 0.009(2)        |
| C(9)  | 0.048(2)        | 0.0335(19)      | 0.043(2)        | 0.0154(16)      | 0.0151(18)      | 0.015(2)        |
| C(10) | 0.057(2)        | 0.036(2)        | 0.050(2)        | 0.0146(18)      | 0.0154(19)      | 0.021(2)        |
| C(11) | 0.052(2)        | 0.035(2)        | 0.036(2)        | 0.0149(17)      | 0.0131(18)      | 0.011(2)        |
| C(12) | 0.043(2)        | 0.0326(19)      | 0.035(2)        | 0.0155(16)      | 0.0112(17)      | 0.012(2)        |
| C(13) | 0.0422(19)      | 0.0322(18)      | 0.033(2)        | 0.0097(16)      | 0.0077(16)      | 0.0062(19)      |
| C(14) | 0.057(2)        | 0.045(2)        | 0.034(2)        | 0.0165(18)      | 0.009(2)        | 0.016(2)        |
| C(15) | 0.043(2)        | 0.0345(19)      | 0.035(2)        | 0.0081(16)      | 0.0076(18)      | 0.004(2)        |
| C(16) | 0.060(2)        | 0.041(2)        | 0.048(3)        | 0.014(2)        | 0.010(2)        | 0.006(2)        |
| C(17) | 0.075(3)        | 0.055(2)        | 0.026(2)        | 0.017(2)        | 0.009(2)        | 0.001(2)        |
| C(18) | 0.052(2)        | 0.040(2)        | 0.044(2)        | 0.0149(19)      | 0.014(2)        | 0.010(2)        |
| C(19) | 0.069(2)        | 0.030(2)        | 0.047(2)        | 0.008(2)        | 0.009(2)        | 0.001(2)        |
| C(20) | 0.081(3)        | 0.051(2)        | 0.070(3)        | -0.008(2)       | 0.018(2)        | 0.028(2)        |

The general temperature factor expression:  $\exp(-2\pi^2(a^2U_{11}h^2 + b^2U_{22}k^2 + c^2U_{33}l^2 + 2a*b*U_{12}hk + 2a*c*U_{13}hl + 2b*c*U_{23}kl))$

Table 3. Bond lengths (Å)

| atom  | atom  | distance | atom  | atom  | distance |
|-------|-------|----------|-------|-------|----------|
| S(1)  | O(2)  | 1.439(2) | S(1)  | O(3)  | 1.445(2) |
| S(1)  | N(5)  | 1.658(2) | S(1)  | C(7)  | 1.732(3) |
| N(4)  | C(12) | 1.379(4) | N(4)  | C(15) | 1.383(3) |
| N(4)  | H(1)  | 0.84(2)  | N(5)  | N(6)  | 1.413(3) |
| N(5)  | C(20) | 1.485(4) | N(6)  | C(8)  | 1.301(3) |
| C(7)  | C(12) | 1.380(3) | C(7)  | C(13) | 1.404(4) |
| C(8)  | C(13) | 1.455(3) | C(8)  | C(17) | 1.505(5) |
| C(9)  | C(10) | 1.401(5) | C(9)  | C(11) | 1.411(3) |
| C(9)  | C(12) | 1.431(4) | C(10) | C(14) | 1.369(3) |
| C(10) | H(2)  | 0.97(2)  | C(11) | C(15) | 1.350(5) |
| C(11) | C(19) | 1.502(3) | C(13) | C(14) | 1.414(5) |
| C(14) | H(3)  | 0.93(2)  | C(15) | C(18) | 1.485(4) |
| C(16) | C(18) | 1.556(5) | C(16) | C(19) | 1.553(5) |
| C(16) | H(6)  | 1.02(2)  | C(16) | H(7)  | 0.99(3)  |
| C(17) | H(13) | 0.89(2)  | C(17) | H(14) | 1.01(3)  |
| C(17) | H(15) | 1.01(3)  | C(18) | H(8)  | 1.02(2)  |
| C(18) | H(9)  | 1.03(2)  | C(19) | H(4)  | 0.98(3)  |
| C(19) | H(5)  | 1.03(3)  | C(20) | H(10) | 1.02(3)  |
| C(20) | H(11) | 1.00(4)  | C(20) | H(12) | 1.04(3)  |

Table 4. Bond angles ( $^{\circ}$ )

| atom  | atom  | atom  | angle      | atom  | atom  | atom  | angle      |
|-------|-------|-------|------------|-------|-------|-------|------------|
| O(2)  | S(1)  | O(3)  | 117.24(13) | O(2)  | S(1)  | N(5)  | 111.80(11) |
| O(2)  | S(1)  | C(7)  | 109.49(14) | O(3)  | S(1)  | N(5)  | 107.89(12) |
| O(3)  | S(1)  | C(7)  | 111.01(14) | N(5)  | S(1)  | C(7)  | 97.67(13)  |
| C(12) | N(4)  | C(15) | 107.8(2)   | C(12) | N(4)  | H(1)  | 126.1(11)  |
| C(15) | N(4)  | H(1)  | 125.8(12)  | S(1)  | N(5)  | N(6)  | 117.12(18) |
| S(1)  | N(5)  | C(20) | 115.2(2)   | N(6)  | N(5)  | C(20) | 110.7(2)   |
| N(5)  | N(6)  | C(8)  | 117.3(2)   | S(1)  | C(7)  | C(12) | 122.7(2)   |
| S(1)  | C(7)  | C(13) | 116.89(19) | C(12) | C(7)  | C(13) | 120.1(2)   |
| N(6)  | C(8)  | C(13) | 124.8(3)   | N(6)  | C(8)  | C(17) | 113.5(2)   |
| C(13) | C(8)  | C(17) | 121.7(3)   | C(10) | C(9)  | C(11) | 135.8(3)   |
| C(10) | C(9)  | C(12) | 117.1(2)   | C(11) | C(9)  | C(12) | 107.0(3)   |
| C(9)  | C(10) | C(14) | 121.4(3)   | C(9)  | C(10) | H(2)  | 117.9(11)  |
| C(14) | C(10) | H(2)  | 120.5(11)  | C(9)  | C(11) | C(15) | 107.2(2)   |
| C(9)  | C(11) | C(19) | 141.8(3)   | C(15) | C(11) | C(19) | 110.9(2)   |
| N(4)  | C(12) | C(7)  | 131.2(3)   | N(4)  | C(12) | C(9)  | 107.1(2)   |
| C(7)  | C(12) | C(9)  | 121.6(3)   | C(7)  | C(13) | C(8)  | 120.5(2)   |
| C(7)  | C(13) | C(14) | 118.5(2)   | C(8)  | C(13) | C(14) | 121.0(2)   |
| C(10) | C(14) | C(13) | 121.3(3)   | C(10) | C(14) | H(3)  | 122.2(14)  |
| C(13) | C(14) | H(3)  | 116.5(13)  | N(4)  | C(15) | C(11) | 110.8(2)   |
| N(4)  | C(15) | C(18) | 133.8(3)   | C(11) | C(15) | C(18) | 115.4(2)   |
| C(18) | C(16) | C(19) | 108.5(2)   | C(18) | C(16) | H(6)  | 109.5(18)  |
| C(18) | C(16) | H(7)  | 108.6(17)  | C(19) | C(16) | H(6)  | 107.0(17)  |
| C(19) | C(16) | H(7)  | 110.1(16)  | H(6)  | C(16) | H(7)  | 113(2)     |
| C(8)  | C(17) | H(13) | 115(2)     | C(8)  | C(17) | H(14) | 111.3(16)  |
| C(8)  | C(17) | H(15) | 109.3(18)  | H(13) | C(17) | H(14) | 102(2)     |
| H(13) | C(17) | H(15) | 109(2)     | H(14) | C(17) | H(15) | 111(2)     |
| C(15) | C(18) | C(16) | 101.7(3)   | C(15) | C(18) | H(8)  | 110.0(10)  |
| C(15) | C(18) | H(9)  | 109.9(12)  | C(16) | C(18) | H(8)  | 113.0(15)  |
| C(16) | C(18) | H(9)  | 110.5(13)  | H(8)  | C(18) | H(9)  | 111(2)     |
| C(11) | C(19) | C(16) | 103.4(2)   | C(11) | C(19) | H(4)  | 110.4(12)  |
| C(11) | C(19) | H(5)  | 109.1(14)  | C(16) | C(19) | H(4)  | 109.3(16)  |
| C(16) | C(19) | H(5)  | 110.8(14)  | H(4)  | C(19) | H(5)  | 113(2)     |
| N(5)  | C(20) | H(10) | 106.4(14)  | N(5)  | C(20) | H(11) | 108(2)     |
| N(5)  | C(20) | H(12) | 108(2)     | H(10) | C(20) | H(11) | 113(3)     |
| H(10) | C(20) | H(12) | 105(2)     | H(11) | C(20) | H(12) | 116(2)     |

Table 5. Torsion Angles( $^{\circ}$ )

| atom1 | atom2 | atom3 | atom4 | angle     | atom1 | atom2 | atom3 | atom4 | angle     |
|-------|-------|-------|-------|-----------|-------|-------|-------|-------|-----------|
| O(2)  | S(1)  | N(5)  | N(6)  | -57.9(2)  | O(2)  | S(1)  | N(5)  | C(20) | 74.9(3)   |
| O(2)  | S(1)  | C(7)  | C(12) | -94.4(3)  | O(2)  | S(1)  | C(7)  | C(13) | 78.3(2)   |
| O(3)  | S(1)  | N(5)  | N(6)  | 171.8(2)  | O(3)  | S(1)  | N(5)  | C(20) | -55.4(3)  |
| O(3)  | S(1)  | C(7)  | C(12) | 36.6(3)   | O(3)  | S(1)  | C(7)  | C(13) | -150.7(2) |
| N(5)  | S(1)  | C(7)  | C(12) | 149.1(3)  | N(5)  | S(1)  | C(7)  | C(13) | -38.2(2)  |
| C(7)  | S(1)  | N(5)  | N(6)  | 56.7(2)   | C(7)  | S(1)  | N(5)  | C(20) | -170.5(3) |
| C(12) | N(4)  | C(15) | C(11) | 0.2(4)    | C(12) | N(4)  | C(15) | C(18) | -178.6(4) |
| C(15) | N(4)  | C(12) | C(7)  | -179.7(3) | C(15) | N(4)  | C(12) | C(9)  | -0.2(3)   |
| S(1)  | N(5)  | N(6)  | C(8)  | -43.6(3)  | C(20) | N(5)  | N(6)  | C(8)  | -178.5(3) |
| N(5)  | N(6)  | C(8)  | C(13) | 2.5(4)    | N(5)  | N(6)  | C(8)  | C(17) | -176.0(3) |
| S(1)  | C(7)  | C(12) | N(4)  | -7.2(5)   | S(1)  | C(7)  | C(12) | C(9)  | 173.3(2)  |
| S(1)  | C(7)  | C(13) | C(8)  | 8.7(4)    | S(1)  | C(7)  | C(13) | C(14) | -173.5(2) |
| C(12) | C(7)  | C(13) | C(8)  | -178.4(3) | C(12) | C(7)  | C(13) | C(14) | -0.5(5)   |
| C(13) | C(7)  | C(12) | N(4)  | -179.7(3) | C(13) | C(7)  | C(12) | C(9)  | 0.8(5)    |
| N(6)  | C(8)  | C(13) | C(7)  | 15.0(5)   | N(6)  | C(8)  | C(13) | C(14) | -162.8(3) |
| C(17) | C(8)  | C(13) | C(7)  | -166.7(3) | C(17) | C(8)  | C(13) | C(14) | 15.5(5)   |
| C(10) | C(9)  | C(11) | C(15) | -180(179) | C(10) | C(9)  | C(11) | C(19) | -2.4(8)   |
| C(11) | C(9)  | C(10) | C(14) | 179.5(4)  | C(10) | C(9)  | C(12) | N(4)  | -180.0(2) |
| C(10) | C(9)  | C(12) | C(7)  | -0.4(5)   | C(12) | C(9)  | C(10) | C(14) | -0.4(5)   |
| C(11) | C(9)  | C(12) | N(4)  | 0.1(3)    | C(11) | C(9)  | C(12) | C(7)  | 179.7(3)  |
| C(12) | C(9)  | C(11) | C(15) | 0.0(3)    | C(12) | C(9)  | C(11) | C(19) | 177.6(4)  |
| C(9)  | C(10) | C(14) | C(13) | 0.7(5)    | C(9)  | C(11) | C(15) | N(4)  | -0.1(3)   |
| C(9)  | C(11) | C(15) | C(18) | 178.9(3)  | C(9)  | C(11) | C(19) | C(16) | -179.8(3) |
| C(15) | C(11) | C(19) | C(16) | -2.3(4)   | C(19) | C(11) | C(15) | N(4)  | -178.5(3) |
| C(19) | C(11) | C(15) | C(18) | 0.5(4)    | C(7)  | C(13) | C(14) | C(10) | -0.2(5)   |
| C(8)  | C(13) | C(14) | C(10) | 177.6(3)  | N(4)  | C(15) | C(18) | C(16) | -179.7(3) |
| C(11) | C(15) | C(18) | C(16) | 1.5(4)    | C(18) | C(16) | C(19) | C(11) | 3.2(4)    |
| C(19) | C(16) | C(18) | C(15) | -2.9(4)   |       |       |       |       |           |

The sign is positive if when looking from atom 2 to atom 3 a clock-wise motion of atom 1 would superimpose it on atom 4.



Table 6. Distances beyond the asymmetric unit out to 3.60 Å

| atom  | atom                 | distance | atom  | atom                 | distance |
|-------|----------------------|----------|-------|----------------------|----------|
| S(1)  | H(1) <sup>11</sup>   | 3.57(2)  | S(1)  | H(4) <sup>21</sup>   | 3.43(3)  |
| S(1)  | H(7) <sup>31</sup>   | 3.36(3)  | S(1)  | H(14) <sup>41</sup>  | 3.33(3)  |
| O(2)  | C(10) <sup>21</sup>  | 3.308(4) | O(2)  | C(17) <sup>41</sup>  | 3.471(5) |
| O(2)  | C(19) <sup>21</sup>  | 3.457(4) | O(2)  | H(2) <sup>21</sup>   | 2.51(2)  |
| O(2)  | H(3) <sup>41</sup>   | 3.44(2)  | O(2)  | H(4) <sup>21</sup>   | 2.77(2)  |
| O(2)  | H(6) <sup>51</sup>   | 3.23(2)  | O(2)  | H(14) <sup>41</sup>  | 2.61(3)  |
| O(2)  | H(15) <sup>41</sup>  | 3.51(3)  | O(3)  | O(3) <sup>11</sup>   | 3.102(2) |
| O(3)  | N(4) <sup>11</sup>   | 3.130(3) | O(3)  | H(1) <sup>11</sup>   | 2.32(2)  |
| O(3)  | H(4) <sup>21</sup>   | 3.18(3)  | O(3)  | H(4) <sup>31</sup>   | 3.25(3)  |
| O(3)  | H(5) <sup>61</sup>   | 3.04(3)  | O(3)  | H(7) <sup>31</sup>   | 2.89(3)  |
| N(4)  | O(3) <sup>11</sup>   | 3.130(3) | N(4)  | H(4) <sup>31</sup>   | 3.40(3)  |
| N(4)  | H(6) <sup>51</sup>   | 2.98(3)  | N(4)  | H(7) <sup>31</sup>   | 3.27(2)  |
| N(4)  | H(8) <sup>31</sup>   | 3.43(2)  | N(4)  | H(9) <sup>51</sup>   | 3.19(2)  |
| N(5)  | H(3) <sup>71</sup>   | 3.56(2)  | N(5)  | H(7) <sup>31</sup>   | 3.51(2)  |
| N(5)  | H(15) <sup>71</sup>  | 2.79(3)  | N(6)  | C(20) <sup>81</sup>  | 3.480(4) |
| N(6)  | H(3) <sup>71</sup>   | 3.23(2)  | N(6)  | H(11) <sup>81</sup>  | 2.95(3)  |
| N(6)  | H(12) <sup>81</sup>  | 3.19(3)  | N(6)  | H(15) <sup>71</sup>  | 2.86(3)  |
| C(7)  | H(7) <sup>31</sup>   | 3.04(3)  | C(7)  | H(8) <sup>31</sup>   | 3.50(2)  |
| C(7)  | H(14) <sup>41</sup>  | 2.94(3)  | C(7)  | H(15) <sup>71</sup>  | 3.43(2)  |
| C(8)  | C(8) <sup>71</sup>   | 3.580(4) | C(8)  | H(14) <sup>41</sup>  | 3.28(3)  |
| C(8)  | H(15) <sup>71</sup>  | 2.95(3)  | C(9)  | H(8) <sup>31</sup>   | 2.88(2)  |
| C(9)  | H(9) <sup>51</sup>   | 3.07(2)  | C(9)  | H(10) <sup>91</sup>  | 3.25(3)  |
| C(9)  | H(12) <sup>91</sup>  | 3.60(4)  | C(10) | O(2) <sup>101</sup>  | 3.308(4) |
| C(10) | H(8) <sup>31</sup>   | 3.29(2)  | C(10) | H(10) <sup>91</sup>  | 3.27(2)  |
| C(10) | H(11) <sup>101</sup> | 3.46(4)  | C(10) | H(12) <sup>91</sup>  | 2.96(4)  |
| C(11) | H(8) <sup>31</sup>   | 3.27(2)  | C(11) | H(9) <sup>51</sup>   | 2.92(3)  |
| C(11) | H(10) <sup>91</sup>  | 3.22(3)  | C(12) | H(6) <sup>51</sup>   | 3.26(3)  |
| C(12) | H(7) <sup>31</sup>   | 3.09(3)  | C(12) | H(8) <sup>31</sup>   | 3.01(3)  |
| C(12) | H(9) <sup>51</sup>   | 3.24(2)  | C(12) | H(14) <sup>41</sup>  | 3.50(3)  |
| C(13) | H(14) <sup>41</sup>  | 2.87(3)  | C(13) | H(15) <sup>71</sup>  | 3.11(3)  |
| C(14) | H(12) <sup>91</sup>  | 3.53(3)  | C(14) | H(12) <sup>71</sup>  | 3.58(4)  |
| C(14) | H(14) <sup>41</sup>  | 3.42(3)  | C(15) | H(6) <sup>51</sup>   | 3.59(3)  |
| C(15) | H(8) <sup>31</sup>   | 3.56(2)  | C(15) | H(9) <sup>51</sup>   | 2.98(3)  |
| C(16) | C(17) <sup>111</sup> | 3.599(5) | C(16) | H(4) <sup>121</sup>  | 3.49(2)  |
| C(16) | H(5) <sup>121</sup>  | 3.28(2)  | C(16) | H(13) <sup>111</sup> | 3.12(3)  |
| C(16) | H(15) <sup>111</sup> | 3.40(2)  | C(17) | O(2) <sup>41</sup>   | 3.471(5) |
| C(17) | C(16) <sup>131</sup> | 3.599(5) | C(17) | H(6) <sup>131</sup>  | 3.34(2)  |

Table 6. Distances beyond the asymmetric unit out to 3.60 Å (continued)

| atom  | atom                | distance | atom  | atom                | distance  |
|-------|---------------------|----------|-------|---------------------|-----------|
| C(17) | H(7) <sup>13</sup>  | 3.33(2)  | C(17) | H(8) <sup>13</sup>  | 3.519(18) |
| C(17) | H(9) <sup>13</sup>  | 3.56(2)  | C(17) | H(11) <sup>8</sup>  | 3.59(3)   |
| C(18) | H(10) <sup>11</sup> | 3.10(3)  | C(18) | H(11) <sup>11</sup> | 3.35(4)   |
| C(18) | H(13) <sup>11</sup> | 2.95(2)  | C(19) | O(2) <sup>10</sup>  | 3.457(4)  |
| C(19) | H(4) <sup>12</sup>  | 3.54(2)  | C(19) | H(5) <sup>12</sup>  | 3.35(2)   |
| C(19) | H(6) <sup>12</sup>  | 3.39(3)  | C(19) | H(9) <sup>5</sup>   | 3.56(2)   |
| C(19) | H(10) <sup>9</sup>  | 3.27(3)  | C(20) | N(6) <sup>8</sup>   | 3.480(4)  |
| C(20) | H(2) <sup>6</sup>   | 3.40(2)  | C(20) | H(5) <sup>6</sup>   | 3.44(3)   |
| C(20) | H(8) <sup>11</sup>  | 3.29(2)  | C(20) | H(9) <sup>11</sup>  | 3.12(2)   |
| C(20) | H(13) <sup>8</sup>  | 3.34(3)  | H(1)  | S(1) <sup>11</sup>  | 3.57(2)   |
| H(1)  | O(3) <sup>11</sup>  | 2.32(2)  | H(1)  | H(4) <sup>3</sup>   | 2.96(4)   |
| H(1)  | H(5) <sup>5</sup>   | 3.33(3)  | H(1)  | H(6) <sup>5</sup>   | 3.00(4)   |
| H(1)  | H(7) <sup>3</sup>   | 3.21(3)  | H(1)  | H(10) <sup>11</sup> | 3.56(3)   |
| H(2)  | O(2) <sup>10</sup>  | 2.51(2)  | H(2)  | C(20) <sup>9</sup>  | 3.40(2)   |
| H(2)  | H(3) <sup>14</sup>  | 3.01(3)  | H(2)  | H(10) <sup>9</sup>  | 3.12(3)   |
| H(2)  | H(11) <sup>10</sup> | 3.26(5)  | H(2)  | H(12) <sup>9</sup>  | 2.67(4)   |
| H(3)  | O(2) <sup>4</sup>   | 3.44(2)  | H(3)  | N(5) <sup>7</sup>   | 3.56(2)   |
| H(3)  | N(6) <sup>7</sup>   | 3.23(2)  | H(3)  | H(2) <sup>14</sup>  | 3.01(3)   |
| H(3)  | H(12) <sup>7</sup>  | 2.86(4)  | H(4)  | S(1) <sup>10</sup>  | 3.43(3)   |
| H(4)  | O(2) <sup>10</sup>  | 2.77(2)  | H(4)  | O(3) <sup>10</sup>  | 3.18(3)   |
| H(4)  | O(3) <sup>3</sup>   | 3.25(3)  | H(4)  | N(4) <sup>3</sup>   | 3.40(3)   |
| H(4)  | C(16) <sup>12</sup> | 3.49(2)  | H(4)  | C(19) <sup>12</sup> | 3.54(2)   |
| H(4)  | H(1) <sup>3</sup>   | 2.96(4)  | H(4)  | H(5) <sup>12</sup>  | 3.06(2)   |
| H(4)  | H(6) <sup>12</sup>  | 2.88(4)  | H(5)  | O(3) <sup>9</sup>   | 3.04(3)   |
| H(5)  | C(16) <sup>12</sup> | 3.28(2)  | H(5)  | C(19) <sup>12</sup> | 3.35(2)   |
| H(5)  | C(20) <sup>9</sup>  | 3.44(3)  | H(5)  | H(1) <sup>5</sup>   | 3.33(3)   |
| H(5)  | H(4) <sup>12</sup>  | 3.06(2)  | H(5)  | H(5) <sup>12</sup>  | 3.32(3)   |
| H(5)  | H(6) <sup>12</sup>  | 3.10(4)  | H(5)  | H(7) <sup>12</sup>  | 2.97(3)   |
| H(5)  | H(9) <sup>5</sup>   | 3.24(4)  | H(5)  | H(10) <sup>9</sup>  | 2.50(4)   |
| H(6)  | O(2) <sup>5</sup>   | 3.23(2)  | H(6)  | N(4) <sup>5</sup>   | 2.98(3)   |
| H(6)  | C(12) <sup>5</sup>  | 3.26(3)  | H(6)  | C(15) <sup>5</sup>  | 3.59(3)   |
| H(6)  | C(17) <sup>11</sup> | 3.34(2)  | H(6)  | C(19) <sup>12</sup> | 3.39(3)   |
| H(6)  | H(1) <sup>5</sup>   | 3.00(4)  | H(6)  | H(4) <sup>12</sup>  | 2.88(4)   |
| H(6)  | H(5) <sup>12</sup>  | 3.10(4)  | H(6)  | H(13) <sup>11</sup> | 2.97(4)   |
| H(6)  | H(14) <sup>11</sup> | 3.12(3)  | H(6)  | H(15) <sup>11</sup> | 3.27(4)   |
| H(7)  | S(1) <sup>3</sup>   | 3.36(3)  | H(7)  | O(3) <sup>3</sup>   | 2.89(3)   |
| H(7)  | N(4) <sup>3</sup>   | 3.27(2)  | H(7)  | N(5) <sup>3</sup>   | 3.51(2)   |

Table 6. Distances beyond the asymmetric unit out to 3.60 Å (continued)

| atom  | atom                 | distance | atom  | atom                 | distance  |
|-------|----------------------|----------|-------|----------------------|-----------|
| H(7)  | C(7) <sup>3j</sup>   | 3.04(3)  | H(7)  | C(12) <sup>3j</sup>  | 3.09(3)   |
| H(7)  | C(17) <sup>11j</sup> | 3.33(2)  | H(7)  | H(1) <sup>3j</sup>   | 3.21(3)   |
| H(7)  | H(5) <sup>12j</sup>  | 2.97(3)  | H(7)  | H(13) <sup>11j</sup> | 2.99(4)   |
| H(7)  | H(14) <sup>11j</sup> | 3.58(3)  | H(7)  | H(15) <sup>11j</sup> | 2.88(3)   |
| H(8)  | N(4) <sup>3j</sup>   | 3.43(2)  | H(8)  | C(7) <sup>3j</sup>   | 3.50(2)   |
| H(8)  | C(9) <sup>3j</sup>   | 2.88(2)  | H(8)  | C(10) <sup>3j</sup>  | 3.29(2)   |
| H(8)  | C(11) <sup>3j</sup>  | 3.27(2)  | H(8)  | C(12) <sup>3j</sup>  | 3.01(3)   |
| H(8)  | C(15) <sup>3j</sup>  | 3.56(2)  | H(8)  | C(17) <sup>11j</sup> | 3.519(18) |
| H(8)  | C(20) <sup>1j</sup>  | 3.29(2)  | H(8)  | H(10) <sup>1j</sup>  | 2.99(4)   |
| H(8)  | H(11) <sup>1j</sup>  | 2.75(5)  | H(8)  | H(13) <sup>11j</sup> | 2.74(3)   |
| H(8)  | H(15) <sup>11j</sup> | 3.56(3)  | H(9)  | N(4) <sup>5j</sup>   | 3.19(2)   |
| H(9)  | C(9) <sup>5j</sup>   | 3.07(2)  | H(9)  | C(11) <sup>5j</sup>  | 2.92(3)   |
| H(9)  | C(12) <sup>5j</sup>  | 3.24(2)  | H(9)  | C(15) <sup>5j</sup>  | 2.98(3)   |
| H(9)  | C(17) <sup>11j</sup> | 3.56(2)  | H(9)  | C(19) <sup>5j</sup>  | 3.56(2)   |
| H(9)  | C(20) <sup>1j</sup>  | 3.12(2)  | H(9)  | H(5) <sup>5j</sup>   | 3.24(4)   |
| H(9)  | H(9) <sup>5j</sup>   | 3.41(3)  | H(9)  | H(10) <sup>1j</sup>  | 2.42(4)   |
| H(9)  | H(11) <sup>1j</sup>  | 3.06(5)  | H(9)  | H(12) <sup>1j</sup>  | 3.60(4)   |
| H(9)  | H(13) <sup>11j</sup> | 2.75(3)  | H(10) | C(9) <sup>6j</sup>   | 3.25(3)   |
| H(10) | C(10) <sup>6j</sup>  | 3.27(2)  | H(10) | C(11) <sup>6j</sup>  | 3.22(3)   |
| H(10) | C(18) <sup>1j</sup>  | 3.10(3)  | H(10) | C(19) <sup>6j</sup>  | 3.27(3)   |
| H(10) | H(1) <sup>1j</sup>   | 3.56(3)  | H(10) | H(2) <sup>6j</sup>   | 3.12(3)   |
| H(10) | H(5) <sup>6j</sup>   | 2.50(4)  | H(10) | H(8) <sup>1j</sup>   | 2.99(4)   |
| H(10) | H(9) <sup>1j</sup>   | 2.42(4)  | H(10) | H(13) <sup>8j</sup>  | 3.44(4)   |
| H(11) | N(6) <sup>8j</sup>   | 2.95(3)  | H(11) | C(10) <sup>2j</sup>  | 3.46(4)   |
| H(11) | C(17) <sup>8j</sup>  | 3.59(3)  | H(11) | C(18) <sup>1j</sup>  | 3.35(4)   |
| H(11) | H(2) <sup>2j</sup>   | 3.26(5)  | H(11) | H(8) <sup>1j</sup>   | 2.75(5)   |
| H(11) | H(9) <sup>1j</sup>   | 3.06(5)  | H(11) | H(11) <sup>8j</sup>  | 3.57(5)   |
| H(11) | H(12) <sup>8j</sup>  | 3.22(5)  | H(11) | H(13) <sup>8j</sup>  | 2.85(4)   |
| H(12) | N(6) <sup>8j</sup>   | 3.19(3)  | H(12) | C(9) <sup>6j</sup>   | 3.60(4)   |
| H(12) | C(10) <sup>6j</sup>  | 2.96(4)  | H(12) | C(14) <sup>6j</sup>  | 3.53(3)   |
| H(12) | C(14) <sup>7j</sup>  | 3.58(4)  | H(12) | H(2) <sup>6j</sup>   | 2.67(4)   |
| H(12) | H(3) <sup>7j</sup>   | 2.86(4)  | H(12) | H(9) <sup>1j</sup>   | 3.60(4)   |
| H(12) | H(11) <sup>8j</sup>  | 3.22(5)  | H(12) | H(13) <sup>8j</sup>  | 3.36(5)   |
| H(12) | H(15) <sup>7j</sup>  | 3.48(4)  | H(13) | C(16) <sup>13j</sup> | 3.12(3)   |
| H(13) | C(18) <sup>13j</sup> | 2.95(2)  | H(13) | C(20) <sup>8j</sup>  | 3.34(3)   |
| H(13) | H(6) <sup>13j</sup>  | 2.97(4)  | H(13) | H(7) <sup>13j</sup>  | 2.99(4)   |
| H(13) | H(8) <sup>13j</sup>  | 2.74(3)  | H(13) | H(9) <sup>13j</sup>  | 2.75(3)   |

Table 6. Distances beyond the asymmetric unit out to 3.60 Å (continued)

| atom  | atom                 | distance | atom  | atom                  | distance |
|-------|----------------------|----------|-------|-----------------------|----------|
| H(13) | H(10) <sup>(8)</sup> | 3.44(4)  | H(13) | H(11) <sup>(8)</sup>  | 2.85(4)  |
| H(13) | H(12) <sup>(8)</sup> | 3.36(5)  | H(14) | S(1) <sup>(4)</sup>   | 3.33(3)  |
| H(14) | O(2) <sup>(4)</sup>  | 2.61(3)  | H(14) | C(7) <sup>(4)</sup>   | 2.94(3)  |
| H(14) | C(8) <sup>(4)</sup>  | 3.28(3)  | H(14) | C(12) <sup>(4)</sup>  | 3.50(3)  |
| H(14) | C(13) <sup>(4)</sup> | 2.87(3)  | H(14) | C(14) <sup>(4)</sup>  | 3.42(3)  |
| H(14) | H(6) <sup>(13)</sup> | 3.12(3)  | H(14) | H(7) <sup>(13)</sup>  | 3.58(3)  |
| H(14) | H(14) <sup>(4)</sup> | 3.48(4)  | H(15) | O(2) <sup>(4)</sup>   | 3.51(3)  |
| H(15) | N(5) <sup>(7)</sup>  | 2.79(3)  | H(15) | N(6) <sup>(7)</sup>   | 2.86(3)  |
| H(15) | C(7) <sup>(7)</sup>  | 3.43(2)  | H(15) | C(8) <sup>(7)</sup>   | 2.95(3)  |
| H(15) | C(13) <sup>(7)</sup> | 3.11(3)  | H(15) | C(16) <sup>(13)</sup> | 3.40(2)  |
| H(15) | H(6) <sup>(13)</sup> | 3.27(4)  | H(15) | H(7) <sup>(13)</sup>  | 2.88(3)  |
| H(15) | H(8) <sup>(13)</sup> | 3.56(3)  | H(15) | H(12) <sup>(7)</sup>  | 3.48(4)  |

Symmetry Operators:

- |                    |                     |
|--------------------|---------------------|
| (1) -X+2,-Y+1,-Z+2 | (2) X,Y-1,Z         |
| (3) -X+2,-Y+2,-Z+2 | (4) -X+2,-Y+1,-Z+1  |
| (5) -X+3,-Y+2,-Z+2 | (6) X-1,Y-1,Z       |
| (7) -X+1,-Y+1,-Z+1 | (8) -X+1,-Y,-Z+1    |
| (9) X+1,Y+1,Z      | (10) X,Y+1,Z        |
| (11) X+1,Y+1,Z+1   | (12) -X+3,-Y+3,-Z+2 |
| (13) X-1,Y-1,Z-1   | (14) -X+2,-Y+2,-Z+1 |

Tabel 7. Intramolecular and Intermolecular Hydrogen bonds

| D    | H    | A             | D...A    | D-H     | H...A     | D-H...A   |
|------|------|---------------|----------|---------|-----------|-----------|
| N(4) | H(1) | O(3)          | 3.045(2) | 0.84(2) | 2.545(17) | 119.3(14) |
| N(4) | H(1) | O(3)[2:2:1:2] | 3.130(3) | 0.84(2) | 2.32(2)   | 161.2(14) |

Note) 1. The symmetry operations are applied to the acceptors.  
2. Estimated standard deviations (esd's) are shown in the parentheses.  
They are not calculated when all atoms have an esd=0.0.
