# Supplementary material for: Thiadiazino-indole, thiadiazino-carbazole and benzothiadiazino-carbazole dioxides: synthesis, physicochemical and early ADME characterization of representatives of new tri-, tetra- and pentacyclic ring systems and their intermediates
Source: publisher site journal article supplement (doi:10.3762/bjoc.21.169), 2025-10-21
Supplement: Additional file 2 [file 3e_xrd.pdf › Átnevezett XRD/3e_xrd.pdf]

**142501**

**PGY0676\_1A**

Submitted by: Pusztai Gyongyver  
Operator: Dancso Andras

X-ray Structure Report

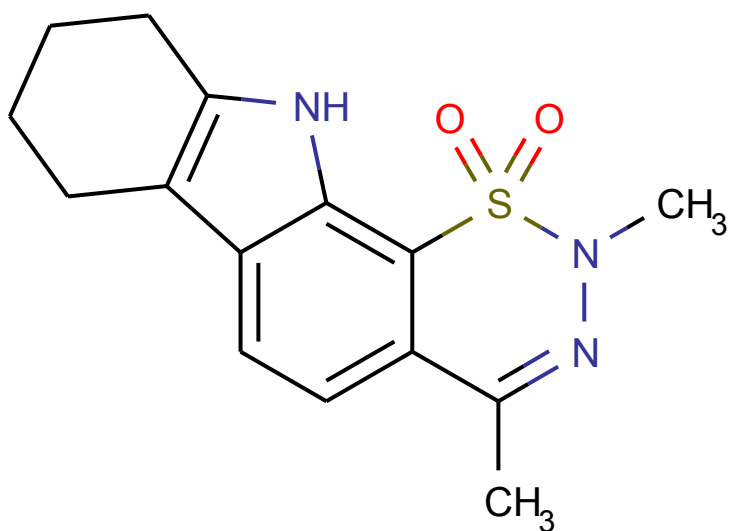

January 14, 2025

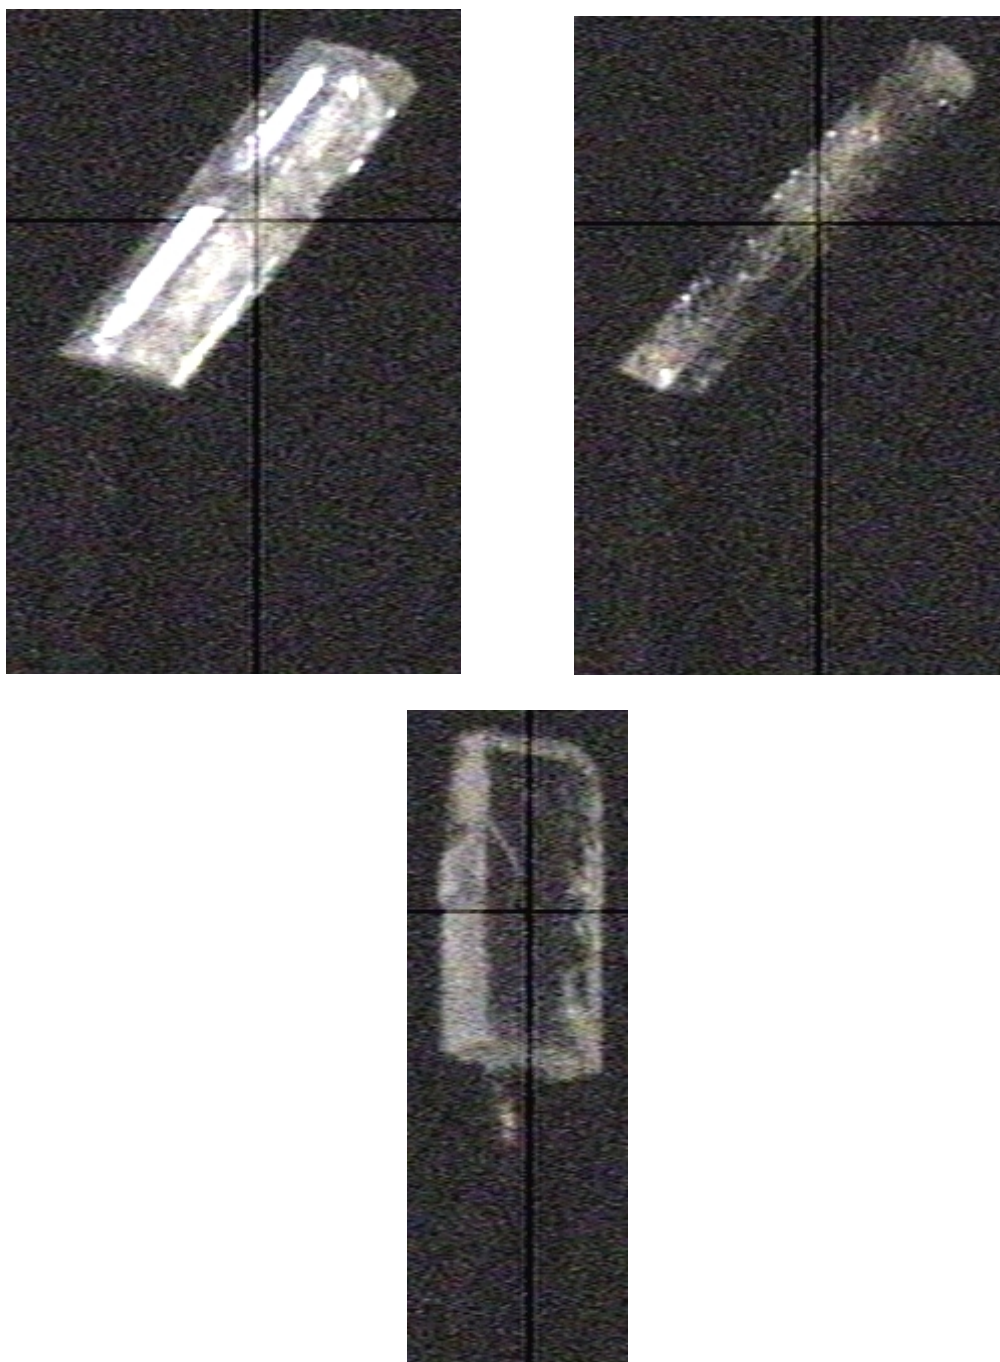

Fig. 1. The crystal

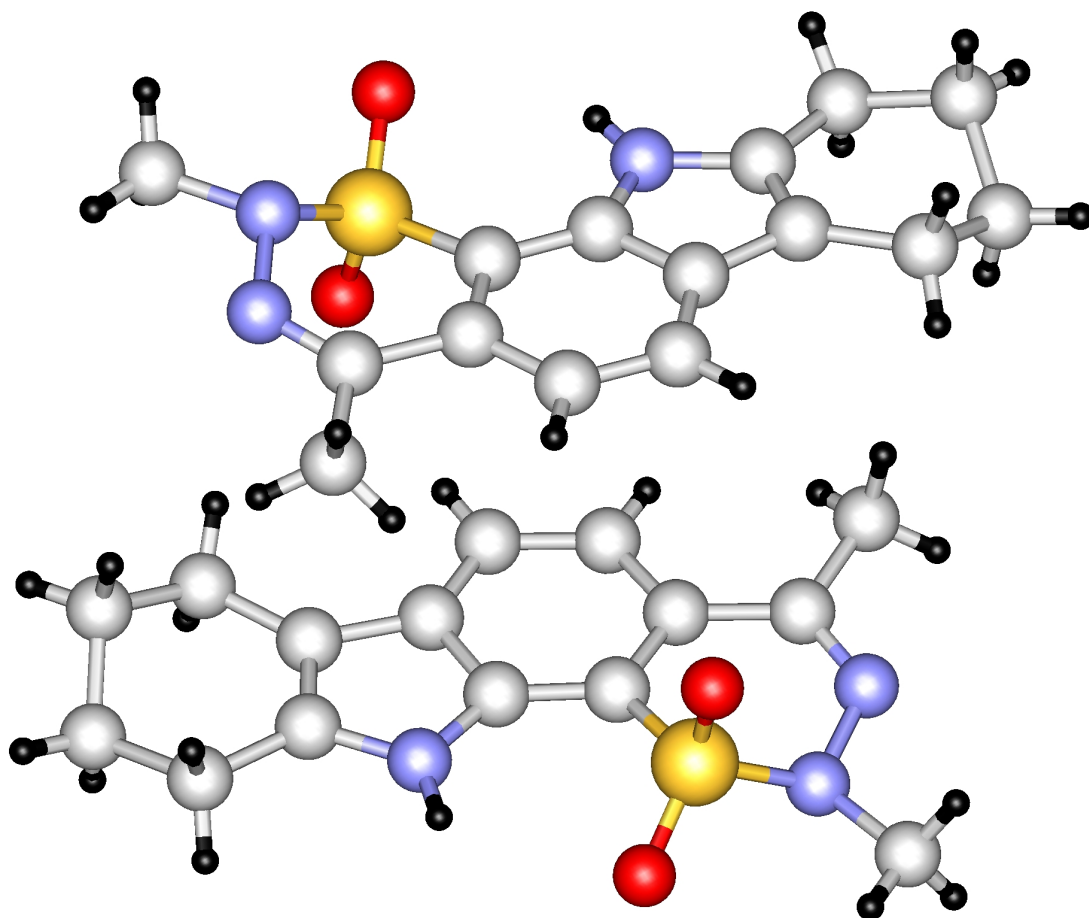

Fig. 2. Molecules in pair (hydrogens were generated by the software)

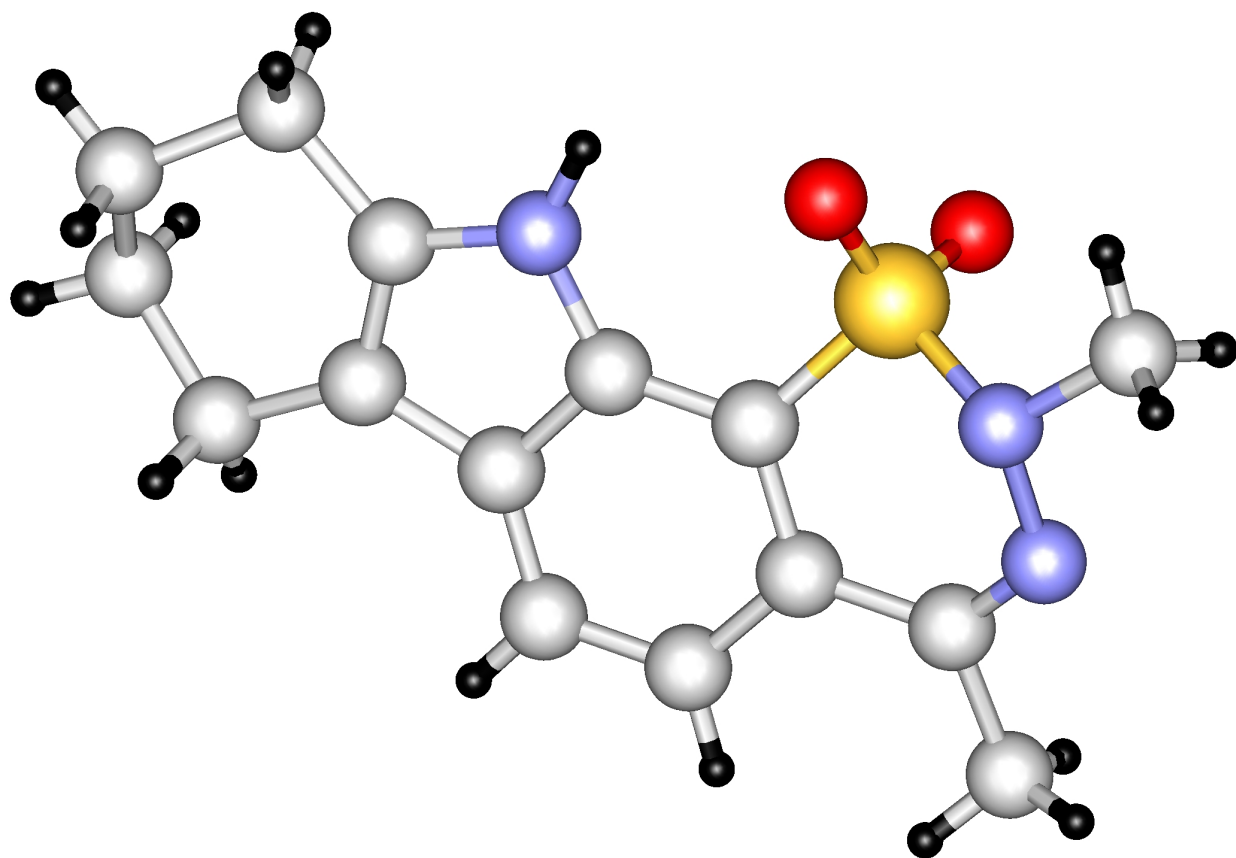

Fig. 3. Fragment 1

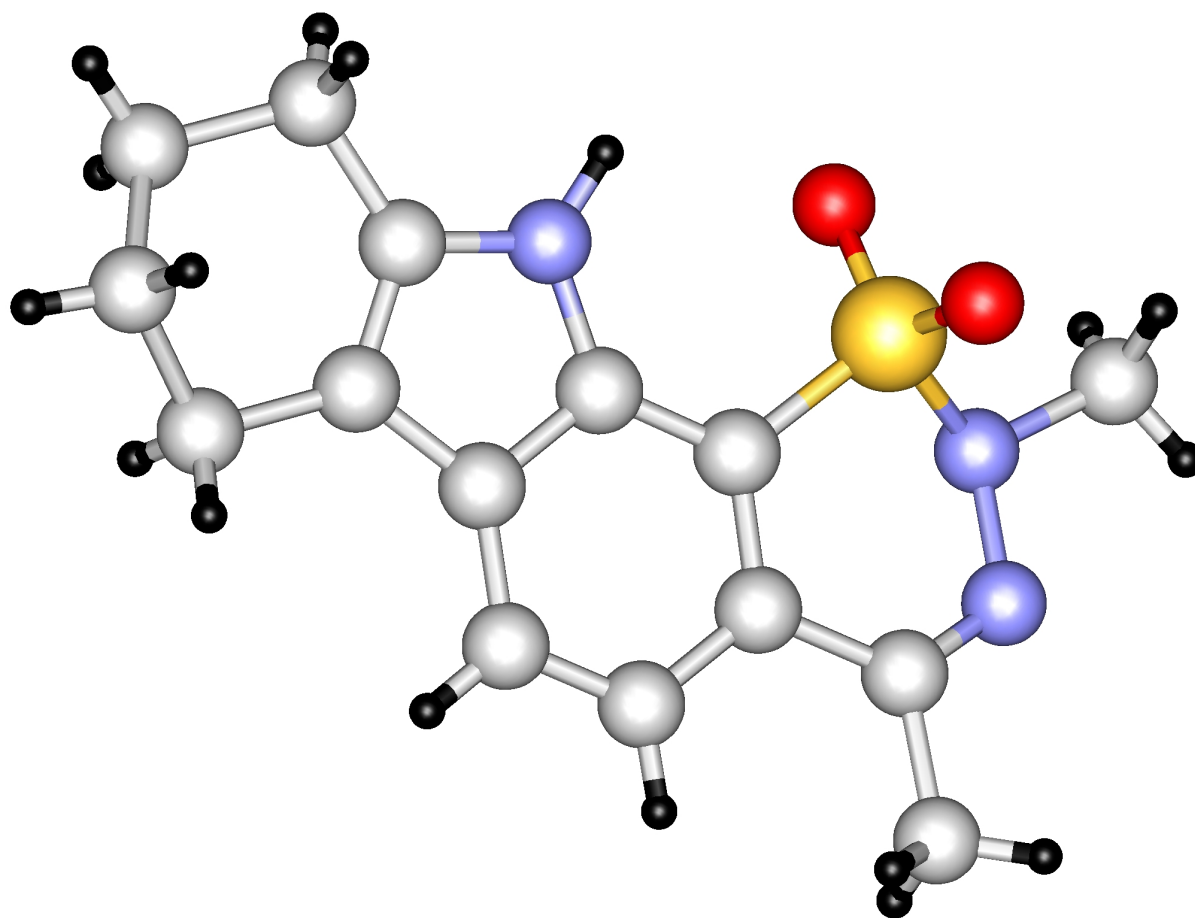

Fig. 4. Fragment 2

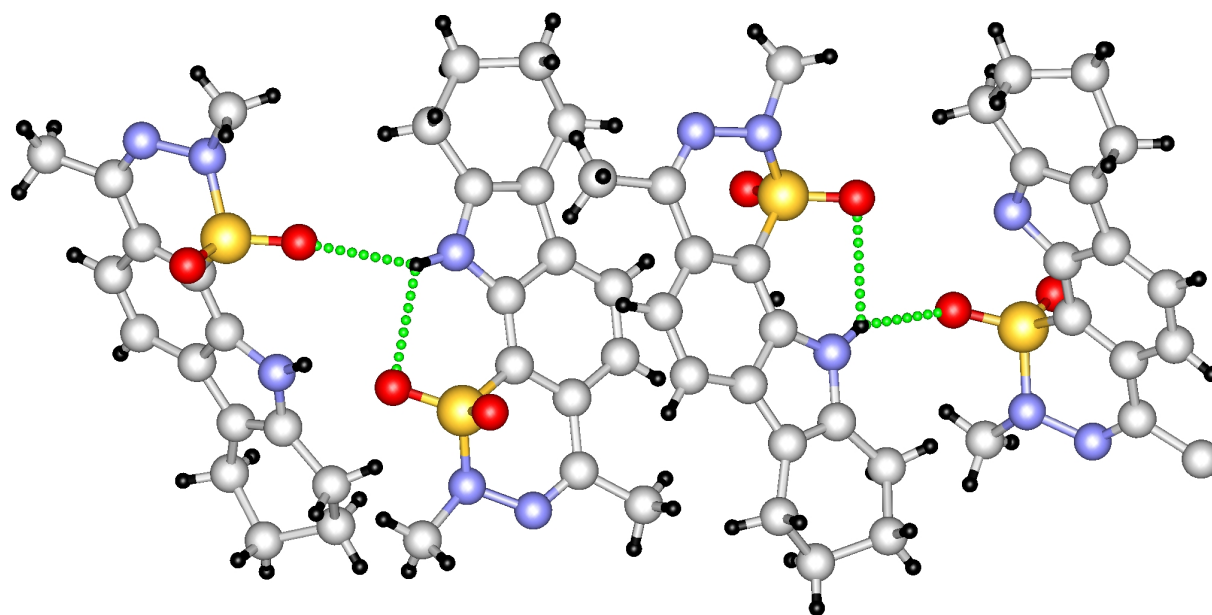

Fig. 5. Hydrogen bonds

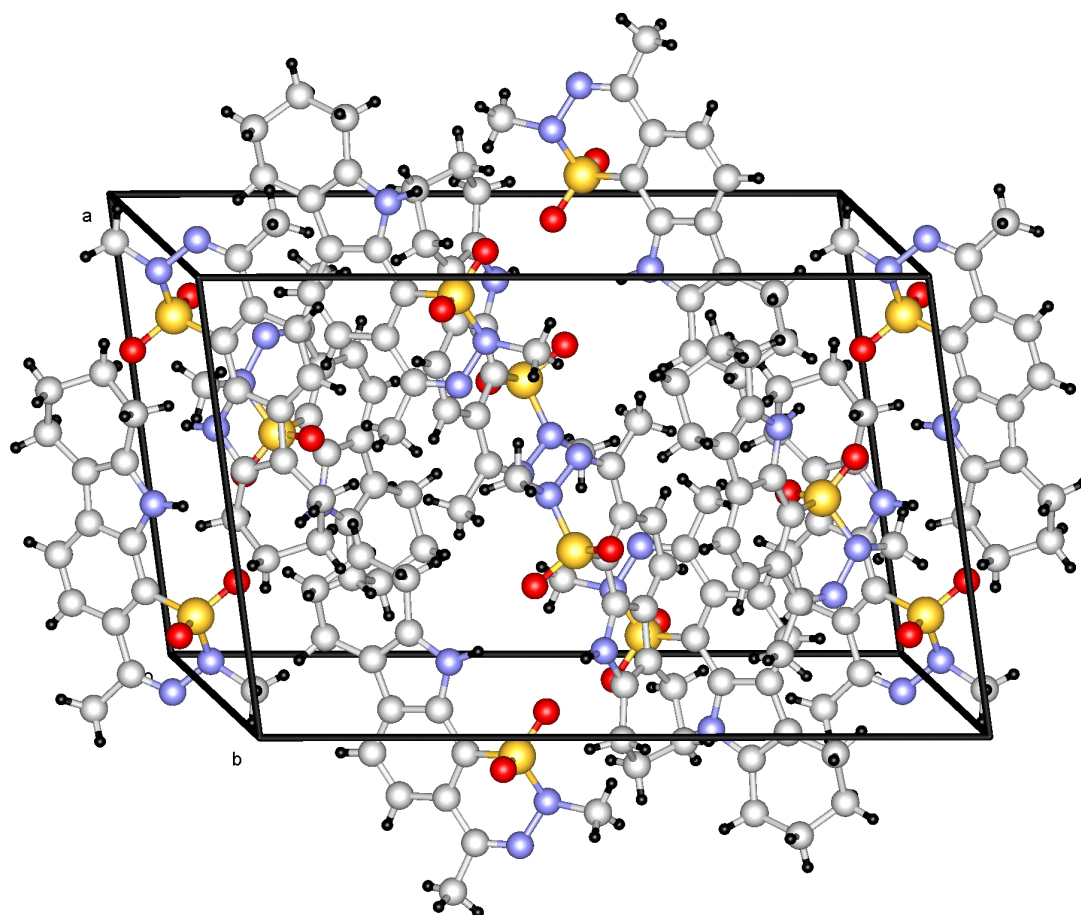

Fig. 6. Packing

## *Experimental*

### Data Collection

A colorless prism crystal of  $C_{15}H_{17}N_3O_2S$  having approximate dimensions of 0.64 x 0.24 x 0.12 mm was mounted on a cactus needle. All measurements were made on a Rigaku RAXIS RAPID imaging plate area detector with graphite monochromated Cu-K $\alpha$  radiation.

Indexing was performed from 4 oscillations that were exposed for 180 seconds. The crystal-to-detector distance was 127.40 mm.

Cell constants and an orientation matrix for data collection corresponded to a primitive monoclinic cell with dimensions:

$$\begin{aligned}a &= 12.9021(7) \text{ \AA} \\b &= 11.1229(6) \text{ \AA} \quad \beta = 100.079(4)^\circ \\c &= 20.2138(14) \text{ \AA} \\V &= 2856.1(3) \text{ \AA}^3\end{aligned}$$

For  $Z = 8$  and F.W. = 303.38, the calculated density is 1.411 g/cm<sup>3</sup>. The systematic absences of:

$$\begin{aligned}h0l: h+l \pm 2n \\0k0: k \pm 2n\end{aligned}$$

uniquely determine the space group to be:

$$P2_1/n \text{ (\#14)}$$

The data were collected at a temperature of  $20 \pm 1^\circ\text{C}$  to a maximum  $2\theta$  value of  $143.5^\circ$ . A total of 180 oscillation images were collected. A sweep of data was done using  $\omega$  scans from  $20.0$  to  $200.0^\circ$  in  $5.0^\circ$  step, at  $\chi=0.0^\circ$  and  $\phi = 0.0^\circ$ . The exposure rate was 36.0 [sec./ $^\circ$ ]. A second sweep was performed using  $\omega$  scans from  $20.0$  to  $200.0^\circ$  in  $5.0^\circ$  step, at  $\chi=54.0^\circ$  and  $\phi = 0.0^\circ$ . The exposure rate was 36.0 [sec./ $^\circ$ ]. Another sweep was performed using  $\omega$  scans from  $20.0$  to  $200.0^\circ$  in  $5.0^\circ$  step, at  $\chi=54.0^\circ$  and  $\phi = 90.0^\circ$ . The exposure rate was 36.0 [sec./ $^\circ$ ]. Another sweep was performed using  $\omega$  scans from  $20.0$  to  $200.0^\circ$  in  $5.0^\circ$  step, at  $\chi=54.0^\circ$  and  $\phi = 180.0^\circ$ . The exposure rate was 36.0 [sec./ $^\circ$ ]. Another sweep was performed using  $\omega$  scans from  $20.0$  to  $200.0^\circ$  in  $5.0^\circ$  step, at  $\chi=54.0^\circ$  and  $\phi = 270.0^\circ$ . The exposure rate was 36.0 [sec./ $^\circ$ ]. The crystal-to-detector distance was 127.40 mm. Readout was performed in the 0.100 mm pixel mode.



## Data Reduction

Of the 32046 reflections that were collected, 5330 were unique ( $R_{\text{int}} = 0.067$ ).

The linear absorption coefficient,  $\mu$ , for Cu-K $\alpha$  radiation is 20.887 cm<sup>-1</sup>. An empirical absorption correction was applied which resulted in transmission factors ranging from 0.441 to 0.773. The data were corrected for Lorentz and polarization effects.

## Structure Solution and Refinement

The structure was solved by direct methods<sup>1</sup> and expanded using Fourier techniques<sup>2</sup>. The non-hydrogen atoms were refined anisotropically. Hydrogen atoms were refined using the riding model. The final cycle of full-matrix least-squares refinement<sup>3</sup> on F was based on 24702 observed reflections ( $I > 2.00\sigma(I)$ ) and 413 variable parameters and converged (largest parameter shift was 0.00 times its esd) with unweighted and weighted agreement factors of:

$$R = \Sigma ||F_o| - |F_c|| / \Sigma |F_o| = 0.1000$$

$$R_w = [ \Sigma w (|F_o| - |F_c|)^2 / \Sigma w F_o^2 ]^{1/2} = 0.1295$$

The standard deviation of an observation of unit weight<sup>4</sup> was 7.74. Unit weights were used. Plots of  $\Sigma w (|F_o| - |F_c|)^2$  versus  $|F_o|$ , reflection order in data collection,  $\sin \theta/\lambda$  and various classes of indices showed no unusual trends. The maximum and minimum peaks on the final difference Fourier map corresponded to 8.13 and -8.21 e<sup>-</sup>/Å<sup>3</sup>, respectively.

Neutral atom scattering factors were taken from Cromer and Waber<sup>5</sup>. Anomalous dispersion effects were included in Fcalc<sup>6</sup>; the values for  $\Delta f'$  and  $\Delta f''$  were those of Creagh and McAuley<sup>7</sup>. The values for the mass attenuation coefficients are those of Creagh and Hubbell<sup>8</sup>. All calculations were performed using the CrystalStructure<sup>9,10</sup> crystallographic software package.

## *References*

- (1) SIR92: Altomare, A., Cascarano, G., Giacovazzo, C., Guagliardi, A., Burla, M., Polidori, G., and Camalli, M. (1994) J. Appl. Cryst., 27, 435.
- (2) DIRDIF99: Beurskens, P.T., Admiraal, G., Beurskens, G., Bosman, W.P., de Gelder, R., Israel, R. and Smits, J.M.M.(1999). The DIRDIF-99 program system, Technical Report of the Crystallography Laboratory, University of Nijmegen, The Netherlands.

(3) Least Squares function minimized:

$$\sum w(|F_o| - |F_c|)^2 \quad \text{where } w = \text{Least Squares weights.}$$

(4) Standard deviation of an observation of unit weight:

$$[\sum w(|F_o| - |F_c|)^2 / (N_o - N_v)]^{1/2}$$

where:  $N_o$  = number of observations

$N_v$  = number of variables

(5) Cromer, D. T. & Waber, J. T.; "International Tables for X-ray Crystallography", Vol. IV, The Kynoch Press, Birmingham, England, Table 2.2 A (1974).

(6) Ibers, J. A. & Hamilton, W. C.; Acta Crystallogr., 17, 781 (1964).

(7) Creagh, D. C. & McAuley, W.J. ; "International Tables for Crystallography", Vol C, (A.J.C. Wilson, ed.), Kluwer Academic Publishers, Boston, Table 4.2.6.8, pages 219-222 (1992).

(8) Creagh, D. C. & Hubbell, J.H.; "International Tables for Crystallography", Vol C, (A.J.C. Wilson, ed.), Kluwer Academic Publishers, Boston, Table 4.2.4.3, pages 200-206 (1992).

(9) CrystalStructure 3.7.0: Crystal Structure Analysis Package, Rigaku and Rigaku/MSK (2000-2005). 9009 New Trails Dr. The Woodlands TX 77381 USA.

(10) CRYSTALS Issue 10: Watkin, D.J., Prout, C.K. Carruthers, J.R. & Betteridge, P.W. Chemical Crystallography Laboratory, Oxford, UK. (1996)

## EXPERIMENTAL DETAILS

### A. Crystal Data

|                         |                                                                                                                                                              |
|-------------------------|--------------------------------------------------------------------------------------------------------------------------------------------------------------|
| Empirical Formula       | $\text{C}_{15}\text{H}_{17}\text{N}_3\text{O}_2\text{S}$                                                                                                     |
| Formula Weight          | 303.38                                                                                                                                                       |
| Crystal Color, Habit    | colorless, prism                                                                                                                                             |
| Crystal Dimensions      | 0.64 X 0.24 X 0.12 mm                                                                                                                                        |
| Crystal System          | monoclinic                                                                                                                                                   |
| Lattice Type            | Primitive                                                                                                                                                    |
| Indexing Images         | 4 oscillations @ 180.0 seconds                                                                                                                               |
| Detector Position       | 127.40 mm                                                                                                                                                    |
| Pixel Size              | 0.100 mm                                                                                                                                                     |
| Lattice Parameters      | $a = 12.9021(7) \text{ \AA}$<br>$b = 11.1229(6) \text{ \AA}$<br>$c = 20.2138(14) \text{ \AA}$<br>$\beta = 100.079(4)^\circ$<br>$V = 2856.1(3) \text{ \AA}^3$ |
| Space Group             | $P2_1/n$ (#14)                                                                                                                                               |
| Z value                 | 8                                                                                                                                                            |
| D <sub>calc</sub>       | 1.411 g/cm <sup>3</sup>                                                                                                                                      |
| F <sub>000</sub>        | 1280.00                                                                                                                                                      |
| $\mu(\text{CuK}\alpha)$ | 20.887 cm <sup>-1</sup>                                                                                                                                      |

## B. Intensity Measurements

|                                                           |                                                                       |
|-----------------------------------------------------------|-----------------------------------------------------------------------|
| Diffractometer                                            | Rigaku RAXIS-RAPID                                                    |
| Radiation                                                 | CuK $\alpha$ ( $\lambda$ = 1.54187 Å)<br>graphite monochromated       |
| Detector Aperture                                         | 280 mm x 256 mm                                                       |
| Data Images                                               | 180 exposures                                                         |
| $\omega$ oscillation Range ( $\chi$ =0.0, $\phi$ =0.0)    | 20.0 - 200.0°                                                         |
| Exposure Rate                                             | 36.0 sec./°                                                           |
| $\omega$ oscillation Range ( $\chi$ =54.0, $\phi$ =0.0)   | 20.0 - 200.0°                                                         |
| Exposure Rate                                             | 36.0 sec./°                                                           |
| $\omega$ oscillation Range ( $\chi$ =54.0, $\phi$ =90.0)  | 20.0 - 200.0°                                                         |
| Exposure Rate                                             | 36.0 sec./°                                                           |
| $\omega$ oscillation Range ( $\chi$ =54.0, $\phi$ =180.0) | 20.0 - 200.0°                                                         |
| Exposure Rate                                             | 36.0 sec./°                                                           |
| $\omega$ oscillation Range ( $\chi$ =54.0, $\phi$ =270.0) | 20.0 - 200.0°                                                         |
| Exposure Rate                                             | 36.0 sec./°                                                           |
| Detector Position                                         | 127.40 mm                                                             |
| Pixel Size                                                | 0.100 mm                                                              |
| $2\theta_{\text{max}}$                                    | 143.5°                                                                |
| No. of Reflections Measured                               | Total: 32046<br>Unique: 5330 ( $R_{\text{int}}$ = 0.067)              |
| Corrections                                               | Lorentz-polarization<br>Absorption<br>(trans. factors: 0.441 - 0.773) |

### C. Structure Solution and Refinement

|                                          |                                |
|------------------------------------------|--------------------------------|
| Structure Solution                       | Direct Methods (SIR92)         |
| Refinement                               | Full-matrix least-squares on F |
| Function Minimized                       | $\Sigma w ( Fo  -  Fc )^2$     |
| Least Squares Weights                    | 1                              |
| $2\theta_{\text{max}}$ cutoff            | 143.5 $^{\circ}$               |
| Anomalous Dispersion                     | All non-hydrogen atoms         |
| No. Observations ( $I > 2.00\sigma(I)$ ) | 24702                          |
| No. Variables                            | 413                            |
| Reflection/Parameter Ratio               | 59.81                          |
| Residuals: R ( $I > 2.00\sigma(I)$ )     | 0.1000                         |
| Residuals: Rw ( $I > 2.00\sigma(I)$ )    | 0.1295                         |
| Goodness of Fit Indicator                | 7.738                          |
| Max Shift/Error in Final Cycle           | 0.000                          |
| Maximum peak in Final Diff. Map          | 8.13 e $^{-}/\text{\AA}^3$     |
| Minimum peak in Final Diff. Map          | -8.21 e $^{-}/\text{\AA}^3$    |

Table 1. Atomic coordinates and B<sub>iso</sub>/B<sub>eq</sub>

| atom  | x          | y           | z           | B <sub>eq</sub> |
|-------|------------|-------------|-------------|-----------------|
| S(1)  | 0.05601(8) | 0.08549(9)  | 0.64161(6)  | 1.99(2)         |
| S(2)  | 0.13417(8) | 0.28176(10) | 1.01086(6)  | 2.16(2)         |
| O(1)  | 0.2098(2)  | 0.2864(2)   | 1.07288(14) | 3.22(8)         |
| O(3)  | -0.0367(2) | 0.1059(2)   | 0.59121(13) | 2.60(7)         |
| O(5)  | 0.0647(2)  | -0.0288(2)  | 0.67514(16) | 3.08(7)         |
| O(6)  | 0.1114(2)  | 0.3913(2)   | 0.97348(14) | 2.87(7)         |
| N(1)  | -0.1232(2) | 0.2245(2)   | 0.70270(17) | 2.03(8)         |
| N(8)  | 0.1600(2)  | 0.1144(2)   | 0.60534(17) | 2.03(8)         |
| N(9)  | 0.0251(2)  | 0.2192(3)   | 1.02980(18) | 2.43(9)         |
| N(10) | 0.2584(2)  | 0.1330(2)   | 0.64886(19) | 2.09(8)         |
| N(11) | 0.3650(2)  | 0.2085(2)   | 0.98115(17) | 2.26(8)         |
| N(12) | -0.0503(2) | 0.1733(3)   | 0.9769(2)   | 2.71(9)         |
| C(13) | -0.0166(3) | 0.2450(3)   | 0.7231(2)   | 1.91(10)        |
| C(14) | 0.0984(3)  | 0.3615(3)   | 0.8102(2)   | 2.46(11)        |
| C(15) | 0.1685(3)  | 0.1694(3)   | 0.9585(2)   | 1.85(10)        |
| C(16) | 0.4477(3)  | 0.1601(3)   | 0.9547(2)   | 2.30(11)        |
| C(17) | 0.2629(2)  | 0.1883(3)   | 0.7038(2)   | 1.85(10)        |
| C(18) | 0.0702(3)  | 0.1991(3)   | 0.6997(2)   | 1.72(9)         |
| C(19) | -0.0022(3) | 0.3266(3)   | 0.7799(2)   | 1.99(10)        |
| C(20) | 0.1733(3)  | 0.2347(3)   | 0.7301(2)   | 1.94(10)        |
| C(21) | -0.1752(3) | 0.2909(3)   | 0.7453(2)   | 2.51(11)        |
| C(22) | 0.2728(3)  | 0.1535(3)   | 0.9512(2)   | 1.98(10)        |
| C(23) | 0.2990(3)  | 0.0702(3)   | 0.9044(2)   | 2.12(10)        |
| C(24) | 0.0898(3)  | 0.1027(3)   | 0.9195(2)   | 2.17(10)        |
| C(25) | 0.4115(3)  | 0.0749(3)   | 0.9086(2)   | 2.24(10)        |
| C(26) | -0.1060(3) | 0.3545(3)   | 0.7933(2)   | 2.26(11)        |
| C(27) | -0.0204(3) | 0.1198(3)   | 0.9289(2)   | 2.49(11)        |
| C(28) | 0.2182(3)  | 0.0044(3)   | 0.8637(2)   | 2.97(12)        |
| C(29) | 0.5595(3)  | 0.2016(4)   | 0.9719(2)   | 3.29(12)        |
| C(30) | 0.1166(3)  | 0.0217(3)   | 0.8714(2)   | 2.93(12)        |
| C(31) | 0.4815(3)  | 0.0020(4)   | 0.8712(2)   | 3.20(12)        |
| C(32) | 0.1835(3)  | 0.3179(3)   | 0.7851(2)   | 2.51(11)        |
| C(33) | 0.3723(2)  | 0.2089(4)   | 0.7411(2)   | 3.27(12)        |
| C(34) | 0.1693(3)  | 0.0326(3)   | 0.5469(2)   | 3.19(12)        |
| C(35) | -0.1402(3) | 0.4288(4)   | 0.8465(2)   | 3.18(12)        |
| C(36) | -0.0247(3) | 0.2925(4)   | 1.0770(2)   | 4.14(14)        |
| C(37) | 0.6313(3)  | 0.1089(4)   | 0.9468(2)   | 3.72(13)        |

Table 1. Atomic coordinates and B<sub>iso</sub>/B<sub>eq</sub> (continued)

| atom  | x          | y         | z         | B <sub>eq</sub> |
|-------|------------|-----------|-----------|-----------------|
| C(38) | -0.1063(3) | 0.0641(4) | 0.8774(2) | 4.04(13)        |
| C(39) | -0.2938(3) | 0.2891(4) | 0.7395(2) | 3.47(12)        |
| C(40) | -0.3241(3) | 0.3918(4) | 0.7866(2) | 4.92(16)        |
| C(41) | -0.2521(3) | 0.3954(4) | 0.8546(2) | 4.40(15)        |
| C(42) | 0.5870(3)  | 0.0713(4) | 0.8737(2) | 3.99(14)        |
| H(1)  | 0.3706     | 0.2697    | 1.0144    | 2.79            |
| H(2)  | 0.1077     | 0.4149    | 0.8475    | 2.91            |
| H(3)  | 0.2353     | -0.0515   | 0.8317    | 3.61            |
| H(4)  | 0.0616     | -0.0210   | 0.8438    | 3.51            |
| H(5)  | 0.2522     | 0.3436    | 0.8047    | 2.90            |
| H(6)  | 0.5672     | 0.2763    | 0.9505    | 3.98            |
| H(7)  | 0.5780     | 0.2111    | 1.0192    | 3.99            |
| H(8)  | 0.4957     | -0.0738   | 0.8925    | 3.91            |
| H(9)  | 0.4476     | -0.0097   | 0.8260    | 3.90            |
| H(10) | -0.0930    | 0.4161    | 0.8876    | 3.88            |
| H(11) | -0.1390    | 0.5112    | 0.8343    | 3.88            |
| H(12) | 0.7004     | 0.1405    | 0.9499    | 4.51            |
| H(13) | 0.6334     | 0.0391    | 0.9742    | 4.51            |
| H(14) | -0.3176    | 0.4668    | 0.7652    | 6.06            |
| H(15) | -0.3948    | 0.3811    | 0.7928    | 6.05            |
| H(16) | -0.2509    | 0.3173    | 0.8736    | 5.44            |
| H(17) | -0.2779    | 0.4513    | 0.8833    | 5.43            |
| H(18) | 0.6368     | 0.0233    | 0.8562    | 4.97            |
| H(19) | 0.5734     | 0.1424    | 0.8475    | 4.97            |
| H(20) | 0.3938     | 0.1434    | 0.7704    | 3.88            |
| H(21) | 0.3734     | 0.2809    | 0.7665    | 3.87            |
| H(22) | 0.4190     | 0.2165    | 0.7098    | 3.87            |
| H(23) | 0.2103     | -0.0357   | 0.5629    | 3.83            |
| H(24) | 0.2027     | 0.0748    | 0.5155    | 3.82            |
| H(25) | 0.1013     | 0.0073    | 0.5255    | 3.81            |
| H(26) | 0.0037     | 0.2703    | 1.1219    | 5.20            |
| H(27) | -0.0985    | 0.2788    | 1.0688    | 5.21            |
| H(28) | -0.0112    | 0.3752    | 1.0705    | 5.19            |
| H(29) | -0.1179    | -0.0162   | 0.8904    | 4.86            |
| H(30) | -0.0856    | 0.0639    | 0.8346    | 4.86            |
| H(31) | -0.1693    | 0.1092    | 0.8752    | 4.86            |
| H(32) | -0.1547    | 0.1744    | 0.6667    | 2.46            |

Table 1. Atomic coordinates and B<sub>iso</sub>/B<sub>eq</sub> (continued)

| atom  | x       | y      | z      | B <sub>eq</sub> |
|-------|---------|--------|--------|-----------------|
| H(33) | -0.3262 | 0.3024 | 0.6942 | 4.23            |
| H(34) | -0.3158 | 0.2137 | 0.7541 | 4.24            |

$$B_{eq} = 8/3 \pi^2 (U_{11}(aa^*)^2 + U_{22}(bb^*)^2 + U_{33}(cc^*)^2 + 2U_{12}(aa^*bb^*)\cos \gamma + 2U_{13}(aa^*cc^*)\cos \beta + 2U_{23}(bb^*cc^*)\cos \alpha)$$

Table 2. Anisotropic displacement parameters

| atom  | U <sub>11</sub> | U <sub>22</sub> | U <sub>33</sub> | U <sub>12</sub> | U <sub>13</sub> | U <sub>23</sub> |
|-------|-----------------|-----------------|-----------------|-----------------|-----------------|-----------------|
| S(1)  | 0.0231(5)       | 0.0267(6)       | 0.0258(7)       | -0.0014(4)      | 0.0035(4)       | -0.0038(5)      |
| S(2)  | 0.0253(5)       | 0.0323(6)       | 0.0260(7)       | 0.0004(4)       | 0.0083(5)       | -0.0050(5)      |
| O(1)  | 0.0320(18)      | 0.062(2)        | 0.029(2)        | 0.0025(15)      | 0.0087(15)      | -0.0212(17)     |
| O(3)  | 0.0248(16)      | 0.0466(19)      | 0.026(2)        | -0.0008(13)     | -0.0002(14)     | -0.0081(15)     |
| O(5)  | 0.0366(18)      | 0.0257(17)      | 0.056(2)        | -0.0000(14)     | 0.0122(16)      | 0.0101(16)      |
| O(6)  | 0.0457(19)      | 0.0274(17)      | 0.039(2)        | 0.0027(14)      | 0.0165(16)      | 0.0049(15)      |
| N(1)  | 0.0205(19)      | 0.030(2)        | 0.027(2)        | -0.0014(15)     | 0.0065(16)      | -0.0154(17)     |
| N(8)  | 0.0223(19)      | 0.032(2)        | 0.023(2)        | -0.0015(15)     | 0.0037(16)      | -0.0012(17)     |
| N(9)  | 0.028(2)        | 0.038(2)        | 0.031(2)        | -0.0003(17)     | 0.0177(18)      | -0.0001(19)     |
| N(10) | 0.0215(19)      | 0.030(2)        | 0.027(2)        | 0.0012(15)      | 0.0023(17)      | 0.0029(18)      |
| N(11) | 0.0262(19)      | 0.032(2)        | 0.029(2)        | -0.0014(16)     | 0.0092(17)      | -0.0165(18)     |
| N(12) | 0.021(2)        | 0.041(2)        | 0.043(2)        | -0.0046(16)     | 0.0083(19)      | -0.012(2)       |
| C(13) | 0.026(2)        | 0.025(2)        | 0.023(3)        | -0.0027(18)     | 0.007(2)        | 0.002(2)        |
| C(14) | 0.032(2)        | 0.041(2)        | 0.020(3)        | -0.008(2)       | 0.003(2)        | -0.017(2)       |
| C(15) | 0.025(2)        | 0.026(2)        | 0.021(2)        | 0.0038(18)      | 0.009(2)        | -0.005(2)       |
| C(16) | 0.023(2)        | 0.037(2)        | 0.029(3)        | -0.002(2)       | 0.010(2)        | -0.008(2)       |
| C(17) | 0.019(2)        | 0.030(2)        | 0.022(2)        | -0.0044(17)     | 0.0034(19)      | 0.001(2)        |
| C(18) | 0.025(2)        | 0.025(2)        | 0.015(2)        | -0.0016(18)     | 0.0038(19)      | -0.0069(19)     |
| C(19) | 0.029(2)        | 0.027(2)        | 0.023(2)        | -0.0021(18)     | 0.012(2)        | 0.000(2)        |
| C(20) | 0.026(2)        | 0.027(2)        | 0.020(2)        | -0.0049(18)     | 0.003(2)        | 0.004(2)        |
| C(21) | 0.028(2)        | 0.033(2)        | 0.036(3)        | 0.001(2)        | 0.011(2)        | 0.008(2)        |
| C(22) | 0.027(2)        | 0.026(2)        | 0.023(2)        | 0.0007(18)      | 0.007(2)        | -0.006(2)       |
| C(23) | 0.026(2)        | 0.029(2)        | 0.027(3)        | 0.0008(19)      | 0.008(2)        | -0.007(2)       |
| C(24) | 0.022(2)        | 0.031(2)        | 0.030(3)        | -0.0022(19)     | 0.005(2)        | -0.009(2)       |
| C(25) | 0.021(2)        | 0.034(2)        | 0.032(3)        | -0.0004(19)     | 0.011(2)        | -0.009(2)       |
| C(26) | 0.036(2)        | 0.028(2)        | 0.023(3)        | 0.001(2)        | 0.007(2)        | -0.004(2)       |
| C(27) | 0.025(2)        | 0.032(2)        | 0.036(3)        | -0.0046(19)     | 0.002(2)        | -0.008(2)       |
| C(28) | 0.035(2)        | 0.037(2)        | 0.042(3)        | 0.000(2)        | 0.010(2)        | -0.022(2)       |
| C(29) | 0.027(2)        | 0.056(3)        | 0.043(3)        | -0.009(2)       | 0.009(2)        | -0.021(2)       |
| C(30) | 0.023(2)        | 0.039(2)        | 0.049(3)        | -0.009(2)       | 0.006(2)        | -0.019(2)       |
| C(31) | 0.029(2)        | 0.048(3)        | 0.047(3)        | 0.005(2)        | 0.011(2)        | -0.016(2)       |
| C(32) | 0.024(2)        | 0.047(3)        | 0.021(3)        | -0.010(2)       | -0.006(2)       | -0.004(2)       |
| C(33) | 0.026(2)        | 0.051(3)        | 0.044(3)        | 0.001(2)        | -0.002(2)       | -0.003(2)       |
| C(34) | 0.039(2)        | 0.051(3)        | 0.031(3)        | 0.011(2)        | 0.006(2)        | -0.014(2)       |
| C(35) | 0.045(3)        | 0.047(3)        | 0.031(3)        | 0.003(2)        | 0.012(2)        | -0.019(2)       |
| C(36) | 0.041(3)        | 0.071(3)        | 0.052(4)        | -0.008(2)       | 0.027(2)        | -0.031(3)       |
| C(37) | 0.021(2)        | 0.069(3)        | 0.053(3)        | -0.004(2)       | 0.011(2)        | -0.022(3)       |



Table 2. Anisotropic displacement parameters (continued)

| atom  | U <sub>11</sub> | U <sub>22</sub> | U <sub>33</sub> | U <sub>12</sub> | U <sub>13</sub> | U <sub>23</sub> |
|-------|-----------------|-----------------|-----------------|-----------------|-----------------|-----------------|
| C(38) | 0.019(2)        | 0.062(3)        | 0.073(4)        | -0.002(2)       | 0.007(2)        | -0.024(3)       |
| C(39) | 0.022(2)        | 0.057(3)        | 0.055(3)        | 0.001(2)        | 0.012(2)        | -0.007(2)       |
| C(40) | 0.037(3)        | 0.082(4)        | 0.072(4)        | 0.018(2)        | 0.022(3)        | -0.025(3)       |
| C(41) | 0.054(3)        | 0.068(4)        | 0.050(4)        | 0.013(2)        | 0.022(3)        | -0.024(3)       |
| C(42) | 0.022(2)        | 0.066(3)        | 0.070(4)        | 0.005(2)        | 0.023(2)        | -0.007(3)       |

The general temperature factor expression:  $\exp(-2\pi^2(a^2U_{11}h^2 + b^2U_{22}k^2 + c^2U_{33}l^2 + 2a*b*U_{12}hk + 2a*c*U_{13}hl + 2b*c*U_{23}kl))$

Table 3. Bond lengths (Å)

| atom  | atom  | distance | atom  | atom  | distance |
|-------|-------|----------|-------|-------|----------|
| S(1)  | O(3)  | 1.447(2) | S(1)  | O(5)  | 1.435(2) |
| S(1)  | N(8)  | 1.669(3) | S(1)  | C(18) | 1.713(4) |
| S(2)  | O(1)  | 1.449(2) | S(2)  | O(6)  | 1.437(2) |
| S(2)  | N(9)  | 1.673(3) | S(2)  | C(15) | 1.744(4) |
| N(1)  | C(13) | 1.384(4) | N(1)  | C(21) | 1.393(5) |
| N(1)  | H(32) | 0.950    | N(8)  | N(10) | 1.427(4) |
| N(8)  | C(34) | 1.513(5) | N(9)  | N(12) | 1.410(4) |
| N(9)  | C(36) | 1.485(6) | N(10) | C(17) | 1.262(5) |
| N(11) | C(16) | 1.384(5) | N(11) | C(22) | 1.380(4) |
| N(11) | H(1)  | 0.950    | N(12) | C(27) | 1.255(6) |
| C(13) | C(18) | 1.387(6) | C(13) | C(19) | 1.450(5) |
| C(14) | C(19) | 1.390(5) | C(14) | C(32) | 1.375(6) |
| C(14) | H(2)  | 0.950    | C(15) | C(22) | 1.391(5) |
| C(15) | C(24) | 1.387(5) | C(16) | C(25) | 1.353(5) |
| C(16) | C(29) | 1.496(5) | C(17) | C(20) | 1.449(6) |
| C(17) | C(33) | 1.497(5) | C(18) | C(20) | 1.421(5) |
| C(19) | C(26) | 1.446(6) | C(20) | C(32) | 1.435(6) |
| C(21) | C(26) | 1.392(5) | C(21) | C(39) | 1.513(5) |
| C(22) | C(23) | 1.405(6) | C(23) | C(25) | 1.439(5) |
| C(23) | C(28) | 1.414(5) | C(24) | C(27) | 1.479(6) |
| C(24) | C(30) | 1.412(6) | C(25) | C(31) | 1.512(6) |
| C(26) | C(35) | 1.483(6) | C(27) | C(38) | 1.514(5) |
| C(28) | C(30) | 1.360(6) | C(28) | H(3)  | 0.950    |
| C(29) | C(37) | 1.531(6) | C(29) | H(6)  | 0.950    |
| C(29) | H(7)  | 0.950    | C(30) | H(4)  | 0.950    |
| C(31) | C(42) | 1.557(6) | C(31) | H(8)  | 0.950    |
| C(31) | H(9)  | 0.950    | C(32) | H(5)  | 0.950    |
| C(33) | H(20) | 0.950    | C(33) | H(21) | 0.950    |
| C(33) | H(22) | 0.950    | C(34) | H(23) | 0.950    |
| C(34) | H(24) | 0.950    | C(34) | H(25) | 0.950    |
| C(35) | C(41) | 1.526(6) | C(35) | H(10) | 0.950    |
| C(35) | H(11) | 0.950    | C(36) | H(26) | 0.950    |
| C(36) | H(27) | 0.950    | C(36) | H(28) | 0.950    |
| C(37) | C(42) | 1.547(7) | C(37) | H(12) | 0.950    |
| C(37) | H(13) | 0.950    | C(38) | H(29) | 0.950    |
| C(38) | H(30) | 0.950    | C(38) | H(31) | 0.950    |
| C(39) | C(40) | 1.580(7) | C(39) | H(33) | 0.950    |

Table 3. Bond lengths (Å) (continued)

| atom  | atom  | distance | atom  | atom  | distance |
|-------|-------|----------|-------|-------|----------|
| C(39) | H(34) | 0.950    | C(40) | C(41) | 1.518(6) |
| C(40) | H(14) | 0.950    | C(40) | H(15) | 0.950    |
| C(41) | H(16) | 0.950    | C(41) | H(17) | 0.950    |
| C(42) | H(18) | 0.950    | C(42) | H(19) | 0.950    |

Table 4. Bond angles (°)

| atom  | atom  | atom  | angle      | atom  | atom  | atom  | angle      |
|-------|-------|-------|------------|-------|-------|-------|------------|
| O(3)  | S(1)  | O(5)  | 117.27(16) | O(3)  | S(1)  | N(8)  | 106.83(17) |
| O(3)  | S(1)  | C(18) | 110.04(17) | O(5)  | S(1)  | N(8)  | 112.06(17) |
| O(5)  | S(1)  | C(18) | 109.82(19) | N(8)  | S(1)  | C(18) | 99.29(18)  |
| O(1)  | S(2)  | O(6)  | 117.99(17) | O(1)  | S(2)  | N(9)  | 106.44(18) |
| O(1)  | S(2)  | C(15) | 110.29(18) | O(6)  | S(2)  | N(9)  | 111.75(17) |
| O(6)  | S(2)  | C(15) | 109.80(19) | N(9)  | S(2)  | C(15) | 98.85(19)  |
| C(13) | N(1)  | C(21) | 106.8(3)   | C(13) | N(1)  | H(32) | 126.5      |
| C(21) | N(1)  | H(32) | 126.7      | S(1)  | N(8)  | N(10) | 117.0(2)   |
| S(1)  | N(8)  | C(34) | 114.0(2)   | N(10) | N(8)  | C(34) | 112.7(3)   |
| S(2)  | N(9)  | N(12) | 118.3(2)   | S(2)  | N(9)  | C(36) | 113.2(2)   |
| N(12) | N(9)  | C(36) | 111.6(3)   | N(8)  | N(10) | C(17) | 120.8(3)   |
| C(16) | N(11) | C(22) | 108.7(3)   | C(16) | N(11) | H(1)  | 125.7      |
| C(22) | N(11) | H(1)  | 125.6      | N(9)  | N(12) | C(27) | 119.5(3)   |
| N(1)  | C(13) | C(18) | 131.1(3)   | N(1)  | C(13) | C(19) | 108.8(3)   |
| C(18) | C(13) | C(19) | 120.1(3)   | C(19) | C(14) | C(32) | 118.9(3)   |
| C(19) | C(14) | H(2)  | 120.1      | C(32) | C(14) | H(2)  | 120.9      |
| S(2)  | C(15) | C(22) | 120.6(2)   | S(2)  | C(15) | C(24) | 119.4(3)   |
| C(22) | C(15) | C(24) | 119.8(3)   | N(11) | C(16) | C(25) | 109.9(3)   |
| N(11) | C(16) | C(29) | 124.6(3)   | C(25) | C(16) | C(29) | 125.4(4)   |
| N(10) | C(17) | C(20) | 125.4(3)   | N(10) | C(17) | C(33) | 114.3(3)   |
| C(20) | C(17) | C(33) | 120.2(3)   | S(1)  | C(18) | C(13) | 120.6(2)   |
| S(1)  | C(18) | C(20) | 118.8(3)   | C(13) | C(18) | C(20) | 120.0(3)   |
| C(13) | C(19) | C(14) | 120.2(3)   | C(13) | C(19) | C(26) | 106.8(3)   |
| C(14) | C(19) | C(26) | 133.0(4)   | C(17) | C(20) | C(18) | 119.2(3)   |
| C(17) | C(20) | C(32) | 122.9(3)   | C(18) | C(20) | C(32) | 117.8(3)   |
| N(1)  | C(21) | C(26) | 112.4(3)   | N(1)  | C(21) | C(39) | 122.3(3)   |
| C(26) | C(21) | C(39) | 125.3(4)   | N(11) | C(22) | C(15) | 132.2(3)   |
| N(11) | C(22) | C(23) | 107.3(3)   | C(15) | C(22) | C(23) | 120.5(3)   |
| C(22) | C(23) | C(25) | 107.1(3)   | C(22) | C(23) | C(28) | 119.5(3)   |
| C(25) | C(23) | C(28) | 133.3(4)   | C(15) | C(24) | C(27) | 118.8(3)   |
| C(15) | C(24) | C(30) | 119.3(3)   | C(27) | C(24) | C(30) | 121.9(3)   |
| C(16) | C(25) | C(23) | 106.9(3)   | C(16) | C(25) | C(31) | 123.7(3)   |
| C(23) | C(25) | C(31) | 129.5(3)   | C(19) | C(26) | C(21) | 105.2(3)   |
| C(19) | C(26) | C(35) | 131.2(3)   | C(21) | C(26) | C(35) | 123.5(3)   |
| N(12) | C(27) | C(24) | 126.4(3)   | N(12) | C(27) | C(38) | 115.9(3)   |
| C(24) | C(27) | C(38) | 117.6(4)   | C(23) | C(28) | C(30) | 119.2(4)   |
| C(23) | C(28) | H(3)  | 119.9      | C(30) | C(28) | H(3)  | 120.9      |

Table 4. Bond angles ( $^{\circ}$ ) (continued)

| atom  | atom  | atom  | angle    | atom  | atom  | atom  | angle    |
|-------|-------|-------|----------|-------|-------|-------|----------|
| C(16) | C(29) | C(37) | 109.3(3) | C(16) | C(29) | H(6)  | 109.8    |
| C(16) | C(29) | H(7)  | 109.3    | C(37) | C(29) | H(6)  | 108.7    |
| C(37) | C(29) | H(7)  | 110.3    | H(6)  | C(29) | H(7)  | 109.5    |
| C(24) | C(30) | C(28) | 121.8(3) | C(24) | C(30) | H(4)  | 118.3    |
| C(28) | C(30) | H(4)  | 119.9    | C(25) | C(31) | C(42) | 108.3(3) |
| C(25) | C(31) | H(8)  | 109.5    | C(25) | C(31) | H(9)  | 109.9    |
| C(42) | C(31) | H(8)  | 109.1    | C(42) | C(31) | H(9)  | 110.5    |
| H(8)  | C(31) | H(9)  | 109.5    | C(14) | C(32) | C(20) | 122.8(3) |
| C(14) | C(32) | H(5)  | 119.2    | C(20) | C(32) | H(5)  | 117.9    |
| C(17) | C(33) | H(20) | 110.1    | C(17) | C(33) | H(21) | 109.0    |
| C(17) | C(33) | H(22) | 109.3    | H(20) | C(33) | H(21) | 109.5    |
| H(20) | C(33) | H(22) | 109.5    | H(21) | C(33) | H(22) | 109.5    |
| N(8)  | C(34) | H(23) | 109.2    | N(8)  | C(34) | H(24) | 109.3    |
| N(8)  | C(34) | H(25) | 109.9    | H(23) | C(34) | H(24) | 109.5    |
| H(23) | C(34) | H(25) | 109.5    | H(24) | C(34) | H(25) | 109.5    |
| C(26) | C(35) | C(41) | 110.4(3) | C(26) | C(35) | H(10) | 108.9    |
| C(26) | C(35) | H(11) | 109.2    | C(41) | C(35) | H(10) | 110.1    |
| C(41) | C(35) | H(11) | 108.7    | H(10) | C(35) | H(11) | 109.5    |
| N(9)  | C(36) | H(26) | 109.5    | N(9)  | C(36) | H(27) | 109.4    |
| N(9)  | C(36) | H(28) | 109.4    | H(26) | C(36) | H(27) | 109.5    |
| H(26) | C(36) | H(28) | 109.5    | H(27) | C(36) | H(28) | 109.5    |
| C(29) | C(37) | C(42) | 110.7(3) | C(29) | C(37) | H(12) | 110.2    |
| C(29) | C(37) | H(13) | 108.4    | C(42) | C(37) | H(12) | 110.4    |
| C(42) | C(37) | H(13) | 107.6    | H(12) | C(37) | H(13) | 109.5    |
| C(27) | C(38) | H(29) | 109.1    | C(27) | C(38) | H(30) | 109.8    |
| C(27) | C(38) | H(31) | 109.5    | H(29) | C(38) | H(30) | 109.5    |
| H(29) | C(38) | H(31) | 109.5    | H(30) | C(38) | H(31) | 109.5    |
| C(21) | C(39) | C(40) | 107.3(3) | C(21) | C(39) | H(33) | 110.0    |
| C(21) | C(39) | H(34) | 110.0    | C(40) | C(39) | H(33) | 110.8    |
| C(40) | C(39) | H(34) | 109.4    | H(33) | C(39) | H(34) | 109.5    |
| C(39) | C(40) | C(41) | 112.8(3) | C(39) | C(40) | H(14) | 108.1    |
| C(39) | C(40) | H(15) | 109.5    | C(41) | C(40) | H(14) | 107.4    |
| C(41) | C(40) | H(15) | 109.5    | H(14) | C(40) | H(15) | 109.5    |
| C(35) | C(41) | C(40) | 110.5(4) | C(35) | C(41) | H(16) | 108.5    |
| C(35) | C(41) | H(17) | 110.2    | C(40) | C(41) | H(16) | 107.9    |
| C(40) | C(41) | H(17) | 110.3    | H(16) | C(41) | H(17) | 109.5    |
| C(31) | C(42) | C(37) | 109.8(4) | C(31) | C(42) | H(18) | 110.7    |

Table 4. Bond angles ( $^{\circ}$ ) (continued)

| atom  | atom  | atom  | angle | atom  | atom  | atom  | angle |
|-------|-------|-------|-------|-------|-------|-------|-------|
| C(31) | C(42) | H(19) | 108.6 | C(37) | C(42) | H(18) | 110.2 |
| C(37) | C(42) | H(19) | 108.0 | H(18) | C(42) | H(19) | 109.5 |

Table 5. Torsion Angles( $^{\circ}$ )

| atom1 | atom2 | atom3 | atom4 | angle     | atom1 | atom2 | atom3 | atom4 | angle     |
|-------|-------|-------|-------|-----------|-------|-------|-------|-------|-----------|
| O(3)  | S(1)  | N(8)  | N(10) | 163.1(2)  | O(3)  | S(1)  | N(8)  | C(34) | -62.4(2)  |
| O(3)  | S(1)  | C(18) | C(13) | 41.0(3)   | O(3)  | S(1)  | C(18) | C(20) | -147.2(3) |
| O(5)  | S(1)  | N(8)  | N(10) | -67.2(3)  | O(5)  | S(1)  | N(8)  | C(34) | 67.3(2)   |
| O(5)  | S(1)  | C(18) | C(13) | -89.5(3)  | O(5)  | S(1)  | C(18) | C(20) | 82.3(3)   |
| N(8)  | S(1)  | C(18) | C(13) | 152.9(3)  | N(8)  | S(1)  | C(18) | C(20) | -35.3(3)  |
| C(18) | S(1)  | N(8)  | N(10) | 48.8(2)   | C(18) | S(1)  | N(8)  | C(34) | -176.8(2) |
| O(1)  | S(2)  | N(9)  | N(12) | -162.8(2) | O(1)  | S(2)  | N(9)  | C(36) | 64.0(3)   |
| O(1)  | S(2)  | C(15) | C(22) | -42.2(4)  | O(1)  | S(2)  | C(15) | C(24) | 143.4(3)  |
| O(6)  | S(2)  | N(9)  | N(12) | 67.1(3)   | O(6)  | S(2)  | N(9)  | C(36) | -66.1(3)  |
| O(6)  | S(2)  | C(15) | C(22) | 89.4(3)   | O(6)  | S(2)  | C(15) | C(24) | -84.9(3)  |
| N(9)  | S(2)  | C(15) | C(22) | -153.5(3) | N(9)  | S(2)  | C(15) | C(24) | 32.1(3)   |
| C(15) | S(2)  | N(9)  | N(12) | -48.4(3)  | C(15) | S(2)  | N(9)  | C(36) | 178.3(2)  |
| C(13) | N(1)  | C(21) | C(26) | -0.1(3)   | C(13) | N(1)  | C(21) | C(39) | -178.6(3) |
| C(21) | N(1)  | C(13) | C(18) | 177.9(4)  | C(21) | N(1)  | C(13) | C(19) | -0.1(3)   |
| S(1)  | N(8)  | N(10) | C(17) | -37.4(4)  | C(34) | N(8)  | N(10) | C(17) | -172.4(3) |
| S(2)  | N(9)  | N(12) | C(27) | 38.8(4)   | C(36) | N(9)  | N(12) | C(27) | 172.7(4)  |
| N(8)  | N(10) | C(17) | C(20) | 2.1(6)    | N(8)  | N(10) | C(17) | C(33) | -175.4(3) |
| C(16) | N(11) | C(22) | C(15) | -178.9(4) | C(16) | N(11) | C(22) | C(23) | -0.8(4)   |
| C(22) | N(11) | C(16) | C(25) | -0.3(4)   | C(22) | N(11) | C(16) | C(29) | 176.4(4)  |
| N(9)  | N(12) | C(27) | C(24) | -2.8(6)   | N(9)  | N(12) | C(27) | C(38) | 174.8(3)  |
| N(1)  | C(13) | C(18) | S(1)  | -7.9(6)   | N(1)  | C(13) | C(18) | C(20) | -179.7(4) |
| N(1)  | C(13) | C(19) | C(14) | 180(179)  | N(1)  | C(13) | C(19) | C(26) | 0.2(4)    |
| C(18) | C(13) | C(19) | C(14) | 1.6(6)    | C(18) | C(13) | C(19) | C(26) | -178.0(3) |
| C(19) | C(13) | C(18) | S(1)  | 169.8(3)  | C(19) | C(13) | C(18) | C(20) | -1.9(5)   |
| C(19) | C(14) | C(32) | C(20) | -1.9(6)   | C(32) | C(14) | C(19) | C(13) | 0.3(5)    |
| C(32) | C(14) | C(19) | C(26) | 179.8(4)  | S(2)  | C(15) | C(22) | N(11) | 3.6(6)    |
| S(2)  | C(15) | C(22) | C(23) | -174.3(3) | S(2)  | C(15) | C(24) | C(27) | -6.5(5)   |
| S(2)  | C(15) | C(24) | C(30) | 172.6(3)  | C(22) | C(15) | C(24) | C(27) | 179.1(3)  |
| C(22) | C(15) | C(24) | C(30) | -1.8(6)   | C(24) | C(15) | C(22) | N(11) | 177.9(4)  |
| C(24) | C(15) | C(22) | C(23) | 0.1(4)    | N(11) | C(16) | C(25) | C(23) | 1.2(4)    |
| N(11) | C(16) | C(25) | C(31) | -178.5(3) | N(11) | C(16) | C(29) | C(37) | 166.3(4)  |
| C(25) | C(16) | C(29) | C(37) | -17.5(6)  | C(29) | C(16) | C(25) | C(23) | -175.4(4) |
| C(29) | C(16) | C(25) | C(31) | 4.8(7)    | N(10) | C(17) | C(20) | C(18) | 12.1(6)   |
| N(10) | C(17) | C(20) | C(32) | -166.5(4) | C(33) | C(17) | C(20) | C(18) | -170.5(3) |
| C(33) | C(17) | C(20) | C(32) | 10.8(6)   | S(1)  | C(18) | C(20) | C(17) | 9.8(5)    |
| S(1)  | C(18) | C(20) | C(32) | -171.5(3) | C(13) | C(18) | C(20) | C(17) | -178.3(3) |
| C(13) | C(18) | C(20) | C(32) | 0.4(5)    | C(13) | C(19) | C(26) | C(21) | -0.3(4)   |

Table 5. Torsion angles ( $^{\circ}$ ) (continued)

| atom1 | atom2 | atom3 | atom4 | angle     | atom1 | atom2 | atom3 | atom4 | angle     |
|-------|-------|-------|-------|-----------|-------|-------|-------|-------|-----------|
| C(13) | C(19) | C(26) | C(35) | 177.4(4)  | C(14) | C(19) | C(26) | C(21) | -179.8(4) |
| C(14) | C(19) | C(26) | C(35) | -2.2(8)   | C(17) | C(20) | C(32) | C(14) | -179.8(4) |
| C(18) | C(20) | C(32) | C(14) | 1.6(6)    | N(1)  | C(21) | C(26) | C(19) | 0.2(4)    |
| N(1)  | C(21) | C(26) | C(35) | -177.6(3) | N(1)  | C(21) | C(39) | C(40) | -169.9(4) |
| C(26) | C(21) | C(39) | C(40) | 11.7(6)   | C(39) | C(21) | C(26) | C(19) | 178.7(4)  |
| C(39) | C(21) | C(26) | C(35) | 0.9(7)    | N(11) | C(22) | C(23) | C(25) | 1.5(4)    |
| N(11) | C(22) | C(23) | C(28) | -177.0(3) | C(15) | C(22) | C(23) | C(25) | 179.9(3)  |
| C(15) | C(22) | C(23) | C(28) | 1.3(6)    | C(22) | C(23) | C(25) | C(16) | -1.7(4)   |
| C(22) | C(23) | C(25) | C(31) | 178.0(4)  | C(22) | C(23) | C(28) | C(30) | -1.0(6)   |
| C(25) | C(23) | C(28) | C(30) | -179.0(4) | C(28) | C(23) | C(25) | C(16) | 176.6(4)  |
| C(28) | C(23) | C(25) | C(31) | -3.7(8)   | C(15) | C(24) | C(27) | N(12) | -13.5(6)  |
| C(15) | C(24) | C(27) | C(38) | 168.8(3)  | C(15) | C(24) | C(30) | C(28) | 2.2(6)    |
| C(27) | C(24) | C(30) | C(28) | -178.7(4) | C(30) | C(24) | C(27) | N(12) | 167.3(4)  |
| C(30) | C(24) | C(27) | C(38) | -10.3(6)  | C(16) | C(25) | C(31) | C(42) | -20.9(6)  |
| C(23) | C(25) | C(31) | C(42) | 159.4(4)  | C(19) | C(26) | C(35) | C(41) | -159.9(4) |
| C(21) | C(26) | C(35) | C(41) | 17.4(5)   | C(23) | C(28) | C(30) | C(24) | -0.8(6)   |
| C(16) | C(29) | C(37) | C(42) | 47.0(5)   | C(25) | C(31) | C(42) | C(37) | 49.8(4)   |
| C(26) | C(35) | C(41) | C(40) | -48.6(5)  | C(29) | C(37) | C(42) | C(31) | -66.4(4)  |
| C(21) | C(39) | C(40) | C(41) | -43.7(5)  | C(39) | C(40) | C(41) | C(35) | 65.1(5)   |

The sign is positive if when looking from atom 2 to atom 3 a clock-wise motion of atom 1 would superimpose it on atom 4.

Table 6. Distances beyond the asymmetric unit out to 3.60 Å

| atom  | atom                | distance | atom  | atom                 | distance |
|-------|---------------------|----------|-------|----------------------|----------|
| S(1)  | H(1) <sup>1)</sup>  | 3.574    | S(1)  | H(7) <sup>1)</sup>   | 3.402    |
| S(1)  | H(15) <sup>2)</sup> | 3.495    | S(2)  | H(2)                 | 3.581    |
| S(2)  | H(23) <sup>3)</sup> | 3.380    | S(2)  | H(29) <sup>4)</sup>  | 3.591    |
| O(1)  | O(3) <sup>5)</sup>  | 3.441(3) | O(1)  | N(1) <sup>5)</sup>   | 3.092(4) |
| O(1)  | C(39) <sup>5)</sup> | 3.479(5) | O(1)  | H(11) <sup>6)</sup>  | 3.165    |
| O(1)  | H(17) <sup>6)</sup> | 3.129    | O(1)  | H(29) <sup>4)</sup>  | 3.362    |
| O(1)  | H(32) <sup>5)</sup> | 2.383    | O(1)  | H(33) <sup>5)</sup>  | 2.757    |
| O(3)  | O(1) <sup>1)</sup>  | 3.441(3) | O(3)  | N(11) <sup>1)</sup>  | 3.135(4) |
| O(3)  | C(34) <sup>7)</sup> | 3.379(4) | O(3)  | H(1) <sup>1)</sup>   | 2.259    |
| O(3)  | H(6) <sup>1)</sup>  | 3.597    | O(3)  | H(7) <sup>1)</sup>   | 3.035    |
| O(3)  | H(17) <sup>2)</sup> | 3.062    | O(3)  | H(23) <sup>7)</sup>  | 3.591    |
| O(3)  | H(24) <sup>7)</sup> | 3.415    | O(3)  | H(25) <sup>7)</sup>  | 2.676    |
| O(5)  | C(33) <sup>8)</sup> | 3.400(5) | O(5)  | C(40) <sup>2)</sup>  | 3.443(5) |
| O(5)  | H(3)                | 3.534    | O(5)  | H(4)                 | 3.418    |
| O(5)  | H(5) <sup>8)</sup>  | 2.724    | O(5)  | H(6) <sup>8)</sup>   | 3.540    |
| O(5)  | H(15) <sup>2)</sup> | 2.594    | O(5)  | H(21) <sup>8)</sup>  | 2.486    |
| O(6)  | C(14)               | 3.293(5) | O(6)  | C(34) <sup>3)</sup>  | 3.324(5) |
| O(6)  | H(2)                | 2.553    | O(6)  | H(10)                | 2.906    |
| O(6)  | H(10) <sup>6)</sup> | 3.573    | O(6)  | H(23) <sup>3)</sup>  | 2.662    |
| O(6)  | H(24) <sup>3)</sup> | 3.128    | O(6)  | H(28) <sup>6)</sup>  | 2.967    |
| N(1)  | O(1) <sup>1)</sup>  | 3.092(4) | N(1)  | H(8) <sup>3)</sup>   | 3.543    |
| N(1)  | H(14) <sup>2)</sup> | 3.065    | N(1)  | H(18) <sup>3)</sup>  | 3.524    |
| N(1)  | H(30)               | 3.175    | N(8)  | C(29) <sup>1)</sup>  | 3.453(5) |
| N(8)  | H(5) <sup>8)</sup>  | 3.597    | N(8)  | H(6) <sup>1)</sup>   | 3.376    |
| N(8)  | H(7) <sup>1)</sup>  | 2.698    | N(8)  | H(27) <sup>9)</sup>  | 3.531    |
| N(9)  | H(29) <sup>4)</sup> | 2.908    | N(9)  | H(33) <sup>5)</sup>  | 3.542    |
| N(10) | C(14) <sup>8)</sup> | 3.562(5) | N(10) | C(36) <sup>9)</sup>  | 3.472(6) |
| N(10) | H(2) <sup>8)</sup>  | 2.972    | N(10) | H(3) <sup>3)</sup>   | 3.531    |
| N(10) | H(5) <sup>8)</sup>  | 3.363    | N(10) | H(26) <sup>9)</sup>  | 3.475    |
| N(10) | H(27) <sup>9)</sup> | 2.835    | N(11) | O(3) <sup>5)</sup>   | 3.135(4) |
| N(11) | H(8) <sup>10)</sup> | 3.223    | N(11) | H(13) <sup>10)</sup> | 2.898    |
| N(11) | H(23) <sup>3)</sup> | 3.087    | N(11) | H(25) <sup>3)</sup>  | 3.357    |
| N(12) | H(10)               | 3.241    | N(12) | H(12) <sup>11)</sup> | 3.187    |
| N(12) | H(16)               | 3.424    | N(12) | H(29) <sup>4)</sup>  | 3.595    |
| C(13) | C(31) <sup>3)</sup> | 3.509(6) | C(13) | H(8) <sup>3)</sup>   | 3.133    |
| C(13) | H(9) <sup>3)</sup>  | 3.087    | C(13) | H(30)                | 3.260    |
| C(14) | O(6)                | 3.293(5) | C(14) | N(10) <sup>3)</sup>  | 3.562(5) |

Table 6. Distances beyond the asymmetric unit out to 3.60 Å (continued)

| atom  | atom                 | distance | atom  | atom                 | distance |
|-------|----------------------|----------|-------|----------------------|----------|
| C(14) | H(9) <sup>3j</sup>   | 3.068    | C(14) | H(20) <sup>3j</sup>  | 3.543    |
| C(14) | H(23) <sup>3j</sup>  | 3.429    | C(15) | H(2)                 | 3.534    |
| C(15) | H(13) <sup>10j</sup> | 3.542    | C(16) | H(8) <sup>10j</sup>  | 3.194    |
| C(16) | H(13) <sup>10j</sup> | 2.933    | C(17) | H(3) <sup>3j</sup>   | 2.983    |
| C(17) | H(27) <sup>9j</sup>  | 3.534    | C(18) | H(8) <sup>3j</sup>   | 3.166    |
| C(18) | H(9) <sup>3j</sup>   | 3.282    | C(19) | H(9) <sup>3j</sup>   | 2.988    |
| C(19) | H(30)                | 3.366    | C(20) | H(3) <sup>3j</sup>   | 3.021    |
| C(20) | H(9) <sup>3j</sup>   | 3.344    | C(21) | H(18) <sup>3j</sup>  | 3.391    |
| C(21) | H(30)                | 3.200    | C(21) | H(31)                | 3.303    |
| C(22) | H(13) <sup>10j</sup> | 2.773    | C(22) | H(23) <sup>3j</sup>  | 3.479    |
| C(23) | C(37) <sup>10j</sup> | 3.588(6) | C(23) | H(13) <sup>10j</sup> | 2.741    |
| C(23) | H(20)                | 3.263    | C(25) | H(7) <sup>10j</sup>  | 3.492    |
| C(25) | H(13) <sup>10j</sup> | 2.835    | C(25) | H(20)                | 2.866    |
| C(26) | H(18) <sup>3j</sup>  | 3.521    | C(26) | H(30)                | 3.338    |
| C(26) | H(31)                | 3.366    | C(27) | H(10)                | 3.488    |
| C(28) | H(13) <sup>10j</sup> | 3.527    | C(28) | H(20)                | 3.546    |
| C(29) | N(8) <sup>5j</sup>   | 3.453(5) | C(29) | C(34) <sup>5j</sup>  | 3.506(6) |
| C(29) | H(8) <sup>10j</sup>  | 3.275    | C(29) | H(24) <sup>5j</sup>  | 3.132    |
| C(29) | H(25) <sup>5j</sup>  | 3.427    | C(30) | H(27) <sup>4j</sup>  | 3.576    |
| C(31) | C(13) <sup>8j</sup>  | 3.509(6) | C(31) | C(33)                | 3.593(6) |
| C(31) | H(7) <sup>10j</sup>  | 3.422    | C(31) | H(20)                | 2.664    |
| C(32) | H(3) <sup>3j</sup>   | 3.108    | C(32) | H(9) <sup>3j</sup>   | 3.203    |
| C(32) | H(23) <sup>3j</sup>  | 3.533    | C(33) | O(5) <sup>3j</sup>   | 3.400(5) |
| C(33) | C(31)                | 3.593(6) | C(33) | H(3) <sup>3j</sup>   | 3.238    |
| C(33) | H(9)                 | 3.038    | C(33) | H(15) <sup>12j</sup> | 3.563    |
| C(33) | H(19)                | 3.155    | C(33) | H(26) <sup>9j</sup>  | 3.187    |
| C(33) | H(27) <sup>9j</sup>  | 3.571    | C(34) | O(3) <sup>7j</sup>   | 3.379(4) |
| C(34) | O(6) <sup>8j</sup>   | 3.324(5) | C(34) | C(29) <sup>1j</sup>  | 3.506(6) |
| C(34) | H(1) <sup>8j</sup>   | 3.181    | C(34) | H(2) <sup>8j</sup>   | 3.522    |
| C(34) | H(6) <sup>1j</sup>   | 3.025    | C(34) | H(7) <sup>1j</sup>   | 3.099    |
| C(34) | H(17) <sup>9j</sup>  | 3.495    | C(34) | H(25) <sup>7j</sup>  | 3.569    |
| C(35) | H(28) <sup>6j</sup>  | 3.199    | C(36) | N(10) <sup>13j</sup> | 3.472(6) |
| C(36) | H(4) <sup>4j</sup>   | 3.489    | C(36) | H(10) <sup>6j</sup>  | 3.598    |
| C(36) | H(11) <sup>6j</sup>  | 3.334    | C(36) | H(22) <sup>13j</sup> | 2.903    |
| C(36) | H(29) <sup>4j</sup>  | 3.583    | C(36) | H(33) <sup>5j</sup>  | 3.340    |
| C(37) | C(23) <sup>10j</sup> | 3.588(6) | C(37) | H(16) <sup>12j</sup> | 3.265    |
| C(37) | H(31) <sup>12j</sup> | 3.165    | C(38) | H(12) <sup>11j</sup> | 3.220    |



Table 6. Distances beyond the asymmetric unit out to 3.60 Å (continued)

| atom  | atom                 | distance | atom  | atom                 | distance |
|-------|----------------------|----------|-------|----------------------|----------|
| C(38) | H(14) <sup>2)</sup>  | 3.075    | C(38) | H(16)                | 3.372    |
| C(38) | H(18) <sup>11)</sup> | 3.299    | C(38) | H(33) <sup>2)</sup>  | 3.299    |
| C(39) | O(1) <sup>1)</sup>   | 3.479(5) | C(39) | H(11) <sup>2)</sup>  | 3.475    |
| C(39) | H(19) <sup>11)</sup> | 3.418    | C(39) | H(26) <sup>1)</sup>  | 3.277    |
| C(39) | H(29) <sup>14)</sup> | 3.441    | C(39) | H(31)                | 3.545    |
| C(40) | O(5) <sup>14)</sup>  | 3.443(5) | C(40) | H(19) <sup>11)</sup> | 3.396    |
| C(40) | H(30) <sup>14)</sup> | 3.165    | C(40) | H(32) <sup>14)</sup> | 3.307    |
| C(41) | H(6) <sup>11)</sup>  | 3.540    | C(41) | H(12) <sup>11)</sup> | 3.542    |
| C(41) | H(19) <sup>11)</sup> | 3.591    | C(41) | H(24) <sup>13)</sup> | 3.421    |
| C(41) | H(31)                | 3.361    | C(41) | H(32) <sup>14)</sup> | 3.328    |
| C(42) | H(16) <sup>12)</sup> | 3.444    | C(42) | H(20)                | 3.064    |
| C(42) | H(31) <sup>12)</sup> | 3.167    | C(42) | H(34) <sup>12)</sup> | 3.313    |
| H(1)  | S(1) <sup>5)</sup>   | 3.574    | H(1)  | O(3) <sup>5)</sup>   | 2.259    |
| H(1)  | C(34) <sup>3)</sup>  | 3.181    | H(1)  | H(8) <sup>10)</sup>  | 3.183    |
| H(1)  | H(13) <sup>10)</sup> | 3.445    | H(1)  | H(23) <sup>3)</sup>  | 2.764    |
| H(1)  | H(24) <sup>3)</sup>  | 3.545    | H(1)  | H(25) <sup>3)</sup>  | 2.804    |
| H(1)  | H(32) <sup>5)</sup>  | 3.214    | H(2)  | S(2)                 | 3.581    |
| H(2)  | O(6)                 | 2.553    | H(2)  | N(10) <sup>3)</sup>  | 2.972    |
| H(2)  | C(15)                | 3.534    | H(2)  | C(34) <sup>3)</sup>  | 3.522    |
| H(2)  | H(9) <sup>3)</sup>   | 3.555    | H(2)  | H(20) <sup>3)</sup>  | 3.482    |
| H(2)  | H(22) <sup>3)</sup>  | 3.546    | H(2)  | H(23) <sup>3)</sup>  | 2.758    |
| H(2)  | H(28) <sup>6)</sup>  | 3.237    | H(3)  | O(5)                 | 3.534    |
| H(3)  | N(10) <sup>8)</sup>  | 3.531    | H(3)  | C(17) <sup>8)</sup>  | 2.983    |
| H(3)  | C(20) <sup>8)</sup>  | 3.021    | H(3)  | C(32) <sup>8)</sup>  | 3.108    |
| H(3)  | C(33) <sup>8)</sup>  | 3.238    | H(3)  | H(5) <sup>8)</sup>   | 3.024    |
| H(3)  | H(20)                | 3.362    | H(3)  | H(21) <sup>8)</sup>  | 2.900    |
| H(3)  | H(22) <sup>8)</sup>  | 3.279    | H(4)  | O(5)                 | 3.418    |
| H(4)  | C(36) <sup>4)</sup>  | 3.489    | H(4)  | H(14) <sup>2)</sup>  | 3.515    |
| H(4)  | H(15) <sup>2)</sup>  | 3.371    | H(4)  | H(21) <sup>8)</sup>  | 3.344    |
| H(4)  | H(22) <sup>8)</sup>  | 3.140    | H(4)  | H(26) <sup>4)</sup>  | 3.014    |
| H(4)  | H(27) <sup>4)</sup>  | 3.358    | H(4)  | H(33) <sup>2)</sup>  | 3.585    |
| H(5)  | O(5) <sup>3)</sup>   | 2.724    | H(5)  | N(8) <sup>3)</sup>   | 3.597    |
| H(5)  | N(10) <sup>3)</sup>  | 3.363    | H(5)  | H(3) <sup>3)</sup>   | 3.024    |
| H(5)  | H(23) <sup>3)</sup>  | 2.956    | H(6)  | O(3) <sup>5)</sup>   | 3.597    |
| H(6)  | O(5) <sup>3)</sup>   | 3.540    | H(6)  | N(8) <sup>5)</sup>   | 3.376    |
| H(6)  | C(34) <sup>5)</sup>  | 3.025    | H(6)  | C(41) <sup>12)</sup> | 3.540    |
| H(6)  | H(15) <sup>12)</sup> | 3.507    | H(6)  | H(16) <sup>12)</sup> | 3.067    |

Table 6. Distances beyond the asymmetric unit out to 3.60 Å (continued)

| atom  | atom                 | distance | atom  | atom                 | distance |
|-------|----------------------|----------|-------|----------------------|----------|
| H(6)  | H(17) <sup>12)</sup> | 3.252    | H(6)  | H(24) <sup>5)</sup>  | 2.592    |
| H(6)  | H(25) <sup>3)</sup>  | 3.454    | H(6)  | H(25) <sup>5)</sup>  | 2.838    |
| H(7)  | S(1) <sup>5)</sup>   | 3.402    | H(7)  | O(3) <sup>5)</sup>   | 3.035    |
| H(7)  | N(8) <sup>5)</sup>   | 2.698    | H(7)  | C(25) <sup>10)</sup> | 3.492    |
| H(7)  | C(31) <sup>10)</sup> | 3.422    | H(7)  | C(34) <sup>5)</sup>  | 3.099    |
| H(7)  | H(8) <sup>10)</sup>  | 2.649    | H(7)  | H(24) <sup>5)</sup>  | 2.882    |
| H(7)  | H(25) <sup>5)</sup>  | 3.148    | H(8)  | N(1) <sup>8)</sup>   | 3.543    |
| H(8)  | N(11) <sup>10)</sup> | 3.223    | H(8)  | C(13) <sup>8)</sup>  | 3.133    |
| H(8)  | C(16) <sup>10)</sup> | 3.194    | H(8)  | C(18) <sup>8)</sup>  | 3.166    |
| H(8)  | C(29) <sup>10)</sup> | 3.275    | H(8)  | H(1) <sup>10)</sup>  | 3.183    |
| H(8)  | H(7) <sup>10)</sup>  | 2.649    | H(8)  | H(13) <sup>10)</sup> | 3.429    |
| H(8)  | H(20)                | 3.538    | H(9)  | C(13) <sup>8)</sup>  | 3.087    |
| H(9)  | C(14) <sup>8)</sup>  | 3.068    | H(9)  | C(18) <sup>8)</sup>  | 3.282    |
| H(9)  | C(19) <sup>8)</sup>  | 2.988    | H(9)  | C(20) <sup>8)</sup>  | 3.344    |
| H(9)  | C(32) <sup>8)</sup>  | 3.203    | H(9)  | C(33)                | 3.038    |
| H(9)  | H(2) <sup>8)</sup>   | 3.555    | H(9)  | H(20)                | 2.092    |
| H(9)  | H(21)                | 3.524    | H(9)  | H(22)                | 3.418    |
| H(10) | O(6)                 | 2.906    | H(10) | O(6) <sup>6)</sup>   | 3.573    |
| H(10) | N(12)                | 3.241    | H(10) | C(27)                | 3.488    |
| H(10) | C(36) <sup>6)</sup>  | 3.598    | H(10) | H(28) <sup>6)</sup>  | 2.741    |
| H(10) | H(31)                | 3.550    | H(11) | O(1) <sup>6)</sup>   | 3.165    |
| H(11) | C(36) <sup>6)</sup>  | 3.334    | H(11) | C(39) <sup>14)</sup> | 3.475    |
| H(11) | H(26) <sup>6)</sup>  | 3.032    | H(11) | H(28) <sup>6)</sup>  | 2.783    |
| H(11) | H(32) <sup>14)</sup> | 3.218    | H(11) | H(33) <sup>14)</sup> | 3.307    |
| H(11) | H(34) <sup>14)</sup> | 2.871    | H(12) | N(12) <sup>12)</sup> | 3.187    |
| H(12) | C(38) <sup>12)</sup> | 3.220    | H(12) | C(41) <sup>12)</sup> | 3.542    |
| H(12) | H(16) <sup>12)</sup> | 2.642    | H(12) | H(24) <sup>5)</sup>  | 3.431    |
| H(12) | H(27) <sup>12)</sup> | 3.562    | H(12) | H(29) <sup>12)</sup> | 3.311    |
| H(12) | H(31) <sup>12)</sup> | 2.473    | H(13) | N(11) <sup>10)</sup> | 2.898    |
| H(13) | C(15) <sup>10)</sup> | 3.542    | H(13) | C(16) <sup>10)</sup> | 2.933    |
| H(13) | C(22) <sup>10)</sup> | 2.773    | H(13) | C(23) <sup>10)</sup> | 2.741    |
| H(13) | C(25) <sup>10)</sup> | 2.835    | H(13) | C(28) <sup>10)</sup> | 3.527    |
| H(13) | H(1) <sup>10)</sup>  | 3.445    | H(13) | H(8) <sup>10)</sup>  | 3.429    |
| H(13) | H(31) <sup>12)</sup> | 3.587    | H(14) | N(1) <sup>14)</sup>  | 3.065    |
| H(14) | C(38) <sup>14)</sup> | 3.075    | H(14) | H(4) <sup>14)</sup>  | 3.515    |
| H(14) | H(29) <sup>14)</sup> | 3.116    | H(14) | H(30) <sup>14)</sup> | 2.431    |
| H(14) | H(31) <sup>14)</sup> | 3.229    | H(14) | H(32) <sup>14)</sup> | 2.743    |

Table 6. Distances beyond the asymmetric unit out to 3.60 Å (continued)

| atom  | atom                 | distance | atom  | atom                 | distance |
|-------|----------------------|----------|-------|----------------------|----------|
| H(14) | H(34) <sup>14)</sup> | 3.300    | H(15) | S(1) <sup>14)</sup>  | 3.495    |
| H(15) | O(5) <sup>14)</sup>  | 2.594    | H(15) | C(33) <sup>11)</sup> | 3.563    |
| H(15) | H(4) <sup>14)</sup>  | 3.371    | H(15) | H(6) <sup>11)</sup>  | 3.507    |
| H(15) | H(19) <sup>11)</sup> | 2.933    | H(15) | H(21) <sup>11)</sup> | 3.148    |
| H(15) | H(22) <sup>11)</sup> | 3.245    | H(15) | H(30) <sup>14)</sup> | 3.255    |
| H(15) | H(32) <sup>14)</sup> | 3.396    | H(16) | N(12)                | 3.424    |
| H(16) | C(37) <sup>11)</sup> | 3.265    | H(16) | C(38)                | 3.372    |
| H(16) | C(42) <sup>11)</sup> | 3.444    | H(16) | H(6) <sup>11)</sup>  | 3.067    |
| H(16) | H(12) <sup>11)</sup> | 2.642    | H(16) | H(18) <sup>11)</sup> | 3.570    |
| H(16) | H(19) <sup>11)</sup> | 2.964    | H(16) | H(24) <sup>13)</sup> | 3.260    |
| H(16) | H(31)                | 2.541    | H(17) | O(1) <sup>6)</sup>   | 3.129    |
| H(17) | O(3) <sup>14)</sup>  | 3.062    | H(17) | C(34) <sup>13)</sup> | 3.495    |
| H(17) | H(6) <sup>11)</sup>  | 3.252    | H(17) | H(24) <sup>13)</sup> | 2.743    |
| H(17) | H(25) <sup>13)</sup> | 3.532    | H(17) | H(32) <sup>14)</sup> | 2.761    |
| H(18) | N(1) <sup>8)</sup>   | 3.524    | H(18) | C(21) <sup>8)</sup>  | 3.391    |
| H(18) | C(26) <sup>8)</sup>  | 3.521    | H(18) | C(38) <sup>12)</sup> | 3.299    |
| H(18) | H(16) <sup>12)</sup> | 3.570    | H(18) | H(20)                | 3.567    |
| H(18) | H(29) <sup>12)</sup> | 3.150    | H(18) | H(31) <sup>12)</sup> | 2.642    |
| H(18) | H(34) <sup>12)</sup> | 3.092    | H(19) | C(33)                | 3.155    |
| H(19) | C(39) <sup>12)</sup> | 3.418    | H(19) | C(40) <sup>12)</sup> | 3.396    |
| H(19) | C(41) <sup>12)</sup> | 3.591    | H(19) | H(15) <sup>12)</sup> | 2.933    |
| H(19) | H(16) <sup>12)</sup> | 2.964    | H(19) | H(20)                | 2.556    |
| H(19) | H(21)                | 3.199    | H(19) | H(22)                | 3.233    |
| H(19) | H(31) <sup>12)</sup> | 3.289    | H(19) | H(34) <sup>12)</sup> | 2.679    |
| H(20) | C(14) <sup>8)</sup>  | 3.543    | H(20) | C(23)                | 3.263    |
| H(20) | C(25)                | 2.866    | H(20) | C(28)                | 3.546    |
| H(20) | C(31)                | 2.664    | H(20) | C(42)                | 3.064    |
| H(20) | H(2) <sup>8)</sup>   | 3.482    | H(20) | H(3)                 | 3.362    |
| H(20) | H(8)                 | 3.538    | H(20) | H(9)                 | 2.092    |
| H(20) | H(18)                | 3.567    | H(20) | H(19)                | 2.556    |
| H(21) | O(5) <sup>3)</sup>   | 2.486    | H(21) | H(3) <sup>3)</sup>   | 2.900    |
| H(21) | H(4) <sup>3)</sup>   | 3.344    | H(21) | H(9)                 | 3.524    |
| H(21) | H(15) <sup>12)</sup> | 3.148    | H(21) | H(19)                | 3.199    |
| H(22) | C(36) <sup>9)</sup>  | 2.903    | H(22) | H(2) <sup>8)</sup>   | 3.546    |
| H(22) | H(3) <sup>3)</sup>   | 3.279    | H(22) | H(4) <sup>3)</sup>   | 3.140    |
| H(22) | H(9)                 | 3.418    | H(22) | H(15) <sup>12)</sup> | 3.245    |
| H(22) | H(19)                | 3.233    | H(22) | H(26) <sup>9)</sup>  | 2.247    |

Table 6. Distances beyond the asymmetric unit out to 3.60 Å (continued)

| atom  | atom                 | distance | atom  | atom                 | distance |
|-------|----------------------|----------|-------|----------------------|----------|
| H(22) | H(27) <sup>9)</sup>  | 2.821    | H(22) | H(28) <sup>9)</sup>  | 3.266    |
| H(22) | H(33) <sup>12)</sup> | 3.491    | H(22) | H(34) <sup>12)</sup> | 3.382    |
| H(23) | S(2) <sup>8)</sup>   | 3.380    | H(23) | O(3) <sup>7)</sup>   | 3.591    |
| H(23) | O(6) <sup>8)</sup>   | 2.662    | H(23) | N(11) <sup>8)</sup>  | 3.087    |
| H(23) | C(14) <sup>8)</sup>  | 3.429    | H(23) | C(22) <sup>8)</sup>  | 3.479    |
| H(23) | C(32) <sup>8)</sup>  | 3.533    | H(23) | H(1) <sup>8)</sup>   | 2.764    |
| H(23) | H(2) <sup>8)</sup>   | 2.758    | H(23) | H(5) <sup>8)</sup>   | 2.956    |
| H(24) | O(3) <sup>7)</sup>   | 3.415    | H(24) | O(6) <sup>8)</sup>   | 3.128    |
| H(24) | C(29) <sup>1)</sup>  | 3.132    | H(24) | C(41) <sup>9)</sup>  | 3.421    |
| H(24) | H(1) <sup>8)</sup>   | 3.545    | H(24) | H(6) <sup>1)</sup>   | 2.592    |
| H(24) | H(7) <sup>1)</sup>   | 2.882    | H(24) | H(12) <sup>1)</sup>  | 3.431    |
| H(24) | H(16) <sup>9)</sup>  | 3.260    | H(24) | H(17) <sup>9)</sup>  | 2.743    |
| H(24) | H(27) <sup>9)</sup>  | 3.070    | H(25) | O(3) <sup>7)</sup>   | 2.676    |
| H(25) | N(11) <sup>8)</sup>  | 3.357    | H(25) | C(29) <sup>1)</sup>  | 3.427    |
| H(25) | C(34) <sup>7)</sup>  | 3.569    | H(25) | H(1) <sup>8)</sup>   | 2.804    |
| H(25) | H(6) <sup>8)</sup>   | 3.454    | H(25) | H(6) <sup>1)</sup>   | 2.838    |
| H(25) | H(7) <sup>1)</sup>   | 3.148    | H(25) | H(17) <sup>9)</sup>  | 3.532    |
| H(25) | H(25) <sup>7)</sup>  | 2.642    | H(26) | N(10) <sup>13)</sup> | 3.475    |
| H(26) | C(33) <sup>13)</sup> | 3.187    | H(26) | C(39) <sup>5)</sup>  | 3.277    |
| H(26) | H(4) <sup>4)</sup>   | 3.014    | H(26) | H(11) <sup>6)</sup>  | 3.032    |
| H(26) | H(22) <sup>13)</sup> | 2.247    | H(26) | H(29) <sup>4)</sup>  | 3.218    |
| H(26) | H(33) <sup>5)</sup>  | 2.546    | H(26) | H(34) <sup>5)</sup>  | 3.227    |
| H(27) | N(8) <sup>13)</sup>  | 3.531    | H(27) | N(10) <sup>13)</sup> | 2.835    |
| H(27) | C(17) <sup>13)</sup> | 3.534    | H(27) | C(30) <sup>4)</sup>  | 3.576    |
| H(27) | C(33) <sup>13)</sup> | 3.571    | H(27) | H(4) <sup>4)</sup>   | 3.358    |
| H(27) | H(12) <sup>11)</sup> | 3.562    | H(27) | H(22) <sup>13)</sup> | 2.821    |
| H(27) | H(24) <sup>13)</sup> | 3.070    | H(28) | O(6) <sup>6)</sup>   | 2.967    |
| H(28) | C(35) <sup>6)</sup>  | 3.199    | H(28) | H(2) <sup>6)</sup>   | 3.237    |
| H(28) | H(10) <sup>6)</sup>  | 2.741    | H(28) | H(11) <sup>6)</sup>  | 2.783    |
| H(28) | H(22) <sup>13)</sup> | 3.266    | H(29) | S(2) <sup>4)</sup>   | 3.591    |
| H(29) | O(1) <sup>4)</sup>   | 3.362    | H(29) | N(9) <sup>4)</sup>   | 2.908    |
| H(29) | N(12) <sup>4)</sup>  | 3.595    | H(29) | C(36) <sup>4)</sup>  | 3.583    |
| H(29) | C(39) <sup>2)</sup>  | 3.441    | H(29) | H(12) <sup>11)</sup> | 3.311    |
| H(29) | H(14) <sup>2)</sup>  | 3.116    | H(29) | H(18) <sup>11)</sup> | 3.150    |
| H(29) | H(26) <sup>4)</sup>  | 3.218    | H(29) | H(33) <sup>2)</sup>  | 2.661    |
| H(30) | N(1)                 | 3.175    | H(30) | C(13)                | 3.260    |
| H(30) | C(19)                | 3.366    | H(30) | C(21)                | 3.200    |

Table 6. Distances beyond the asymmetric unit out to 3.60 Å (continued)

| atom  | atom                 | distance | atom  | atom                 | distance |
|-------|----------------------|----------|-------|----------------------|----------|
| H(30) | C(26)                | 3.338    | H(30) | C(40) <sup>2j</sup>  | 3.165    |
| H(30) | H(14) <sup>2j</sup>  | 2.431    | H(30) | H(15) <sup>2j</sup>  | 3.255    |
| H(30) | H(32)                | 3.573    | H(30) | H(33) <sup>2j</sup>  | 3.139    |
| H(30) | H(34)                | 3.543    | H(31) | C(21)                | 3.303    |
| H(31) | C(26)                | 3.366    | H(31) | C(37) <sup>11j</sup> | 3.165    |
| H(31) | C(39)                | 3.545    | H(31) | C(41)                | 3.361    |
| H(31) | C(42) <sup>11j</sup> | 3.167    | H(31) | H(10)                | 3.550    |
| H(31) | H(12) <sup>11j</sup> | 2.473    | H(31) | H(13) <sup>11j</sup> | 3.587    |
| H(31) | H(14) <sup>2j</sup>  | 3.229    | H(31) | H(16)                | 2.541    |
| H(31) | H(18) <sup>11j</sup> | 2.642    | H(31) | H(19) <sup>11j</sup> | 3.289    |
| H(31) | H(34)                | 3.049    | H(32) | O(1) <sup>1j</sup>   | 2.383    |
| H(32) | C(40) <sup>2j</sup>  | 3.307    | H(32) | C(41) <sup>2j</sup>  | 3.328    |
| H(32) | H(1) <sup>1j</sup>   | 3.214    | H(32) | H(11) <sup>2j</sup>  | 3.218    |
| H(32) | H(14) <sup>2j</sup>  | 2.743    | H(32) | H(15) <sup>2j</sup>  | 3.396    |
| H(32) | H(17) <sup>2j</sup>  | 2.761    | H(32) | H(30)                | 3.573    |
| H(33) | O(1) <sup>1j</sup>   | 2.757    | H(33) | N(9) <sup>1j</sup>   | 3.542    |
| H(33) | C(36) <sup>1j</sup>  | 3.340    | H(33) | C(38) <sup>14j</sup> | 3.299    |
| H(33) | H(4) <sup>14j</sup>  | 3.585    | H(33) | H(11) <sup>2j</sup>  | 3.307    |
| H(33) | H(22) <sup>11j</sup> | 3.491    | H(33) | H(26) <sup>1j</sup>  | 2.546    |
| H(33) | H(29) <sup>14j</sup> | 2.661    | H(33) | H(30) <sup>14j</sup> | 3.139    |
| H(34) | C(42) <sup>11j</sup> | 3.313    | H(34) | H(11) <sup>2j</sup>  | 2.871    |
| H(34) | H(14) <sup>2j</sup>  | 3.300    | H(34) | H(18) <sup>11j</sup> | 3.092    |
| H(34) | H(19) <sup>11j</sup> | 2.679    | H(34) | H(22) <sup>11j</sup> | 3.382    |
| H(34) | H(26) <sup>1j</sup>  | 3.227    | H(34) | H(30)                | 3.543    |
| H(34) | H(31)                | 3.049    |       |                      |          |

Symmetry Operators:

- |                               |                                   |
|-------------------------------|-----------------------------------|
| (1) $X+1/2, -Y+1/2, Z+1/2-1$  | (2) $-X+1/2-1, Y+1/2-1, -Z+1/2+1$ |
| (3) $-X+1/2, Y+1/2, -Z+1/2+1$ | (4) $-X, -Y, -Z+2$                |
| (5) $X+1/2, -Y+1/2, Z+1/2$    | (6) $-X, -Y+1, -Z+2$              |
| (7) $-X, -Y, -Z+1$            | (8) $-X+1/2, Y+1/2-1, -Z+1/2+1$   |
| (9) $X+1/2, -Y+1/2, Z+1/2-1$  | (10) $-X+1, -Y, -Z+2$             |
| (11) $X-1, Y, Z$              | (12) $X+1, Y, Z$                  |
| (13) $X+1/2-1, -Y+1/2, Z+1/2$ | (14) $-X+1/2-1, Y+1/2, -Z+1/2+1$  |

Table 7. Intramolecular and Intermolecular Hydrogen bonds

| D     | H     | A               | D...A    | D-H   | H...A | D-H...A |
|-------|-------|-----------------|----------|-------|-------|---------|
| N(1)  | H(32) | O(1)[4:-1:0:-1] | 3.092(4) | 0.950 | 2.383 | 131.1   |
| N(1)  | H(32) | O(3)            | 2.991(4) | 0.950 | 2.457 | 115.4   |
| N(11) | H(1)  | O(1)            | 3.082(4) | 0.950 | 2.569 | 114.2   |
| N(11) | H(1)  | O(3)[4:0:0:0]   | 3.135(4) | 0.950 | 2.259 | 152.9   |

Note) 1. The symmetry operations are applied to the acceptors.  
2. Estimated standard deviations (esd's) are shown in the parentheses.  
They are not calculated when all atoms have an esd=0.0.
