# Supplementary material for: Thiadiazino-indole, thiadiazino-carbazole and benzothiadiazino-carbazole dioxides: synthesis, physicochemical and early ADME characterization of representatives of new tri-, tetra- and pentacyclic ring systems and their intermediates
Source: publisher site journal article supplement (doi:10.3762/bjoc.21.169), 2025-10-21
Supplement: Additional file 2 [file 3g_xrd.pdf › Átnevezett XRD/3g_xrd.pdf]

**143497**

**PGY0767\_1A**

Submitted by: Pusztai Gyongyver  
Operator: Dancso Andras

X-ray Structure Report

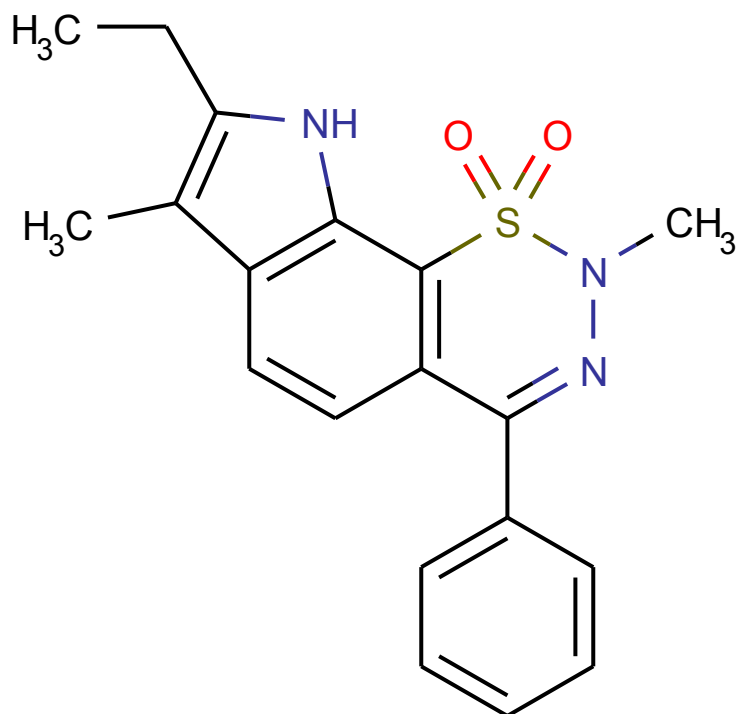

November 12, 2024

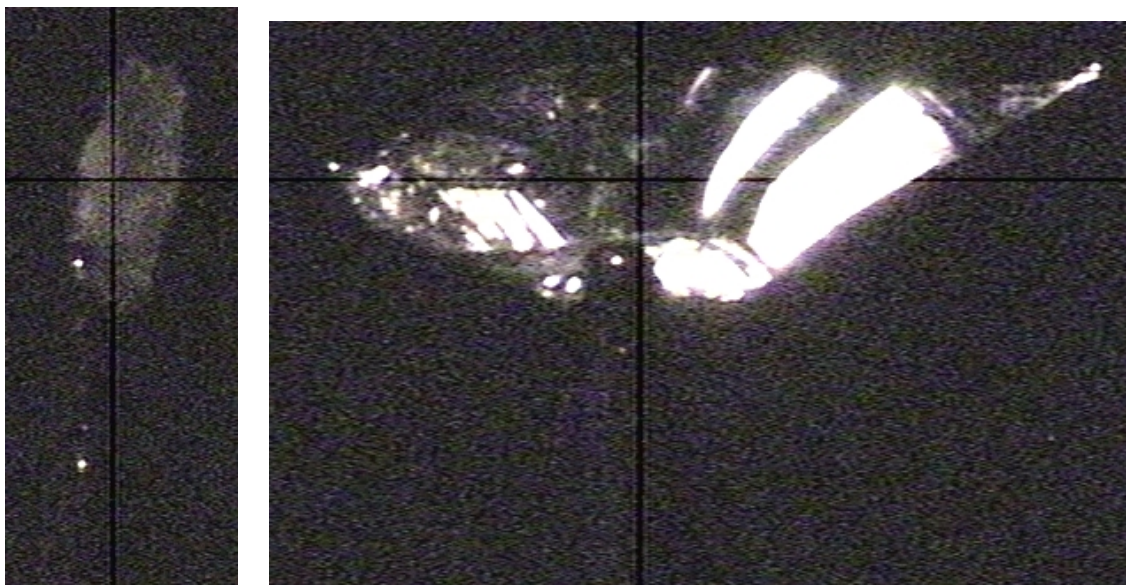

Fig. 1. The crystal

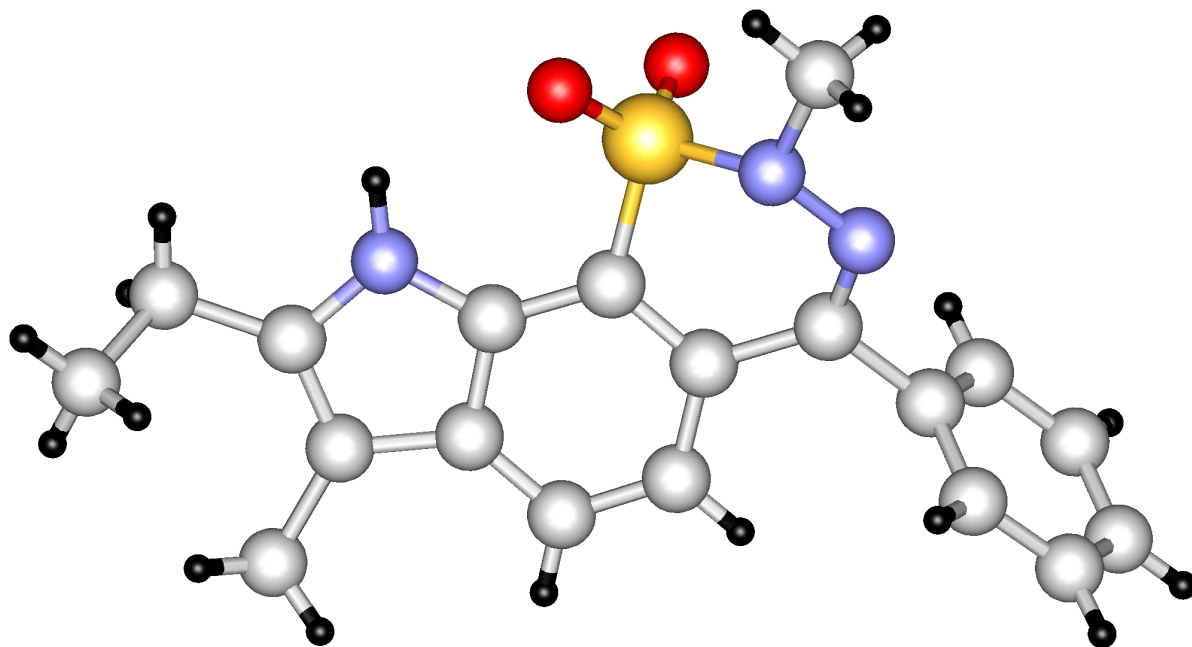

Fig. 2. The molecule (hydrogens were generated by the software)

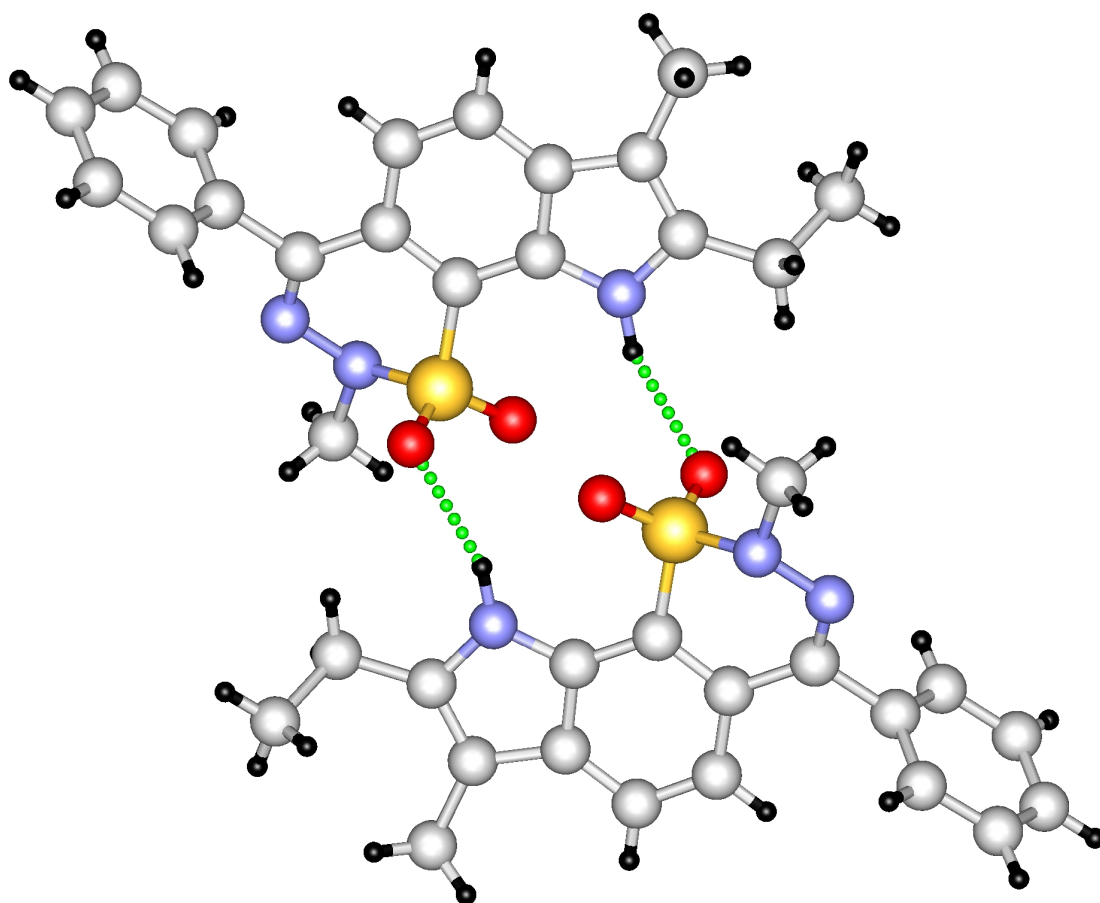

Fig. 3. Hydrogen bonds

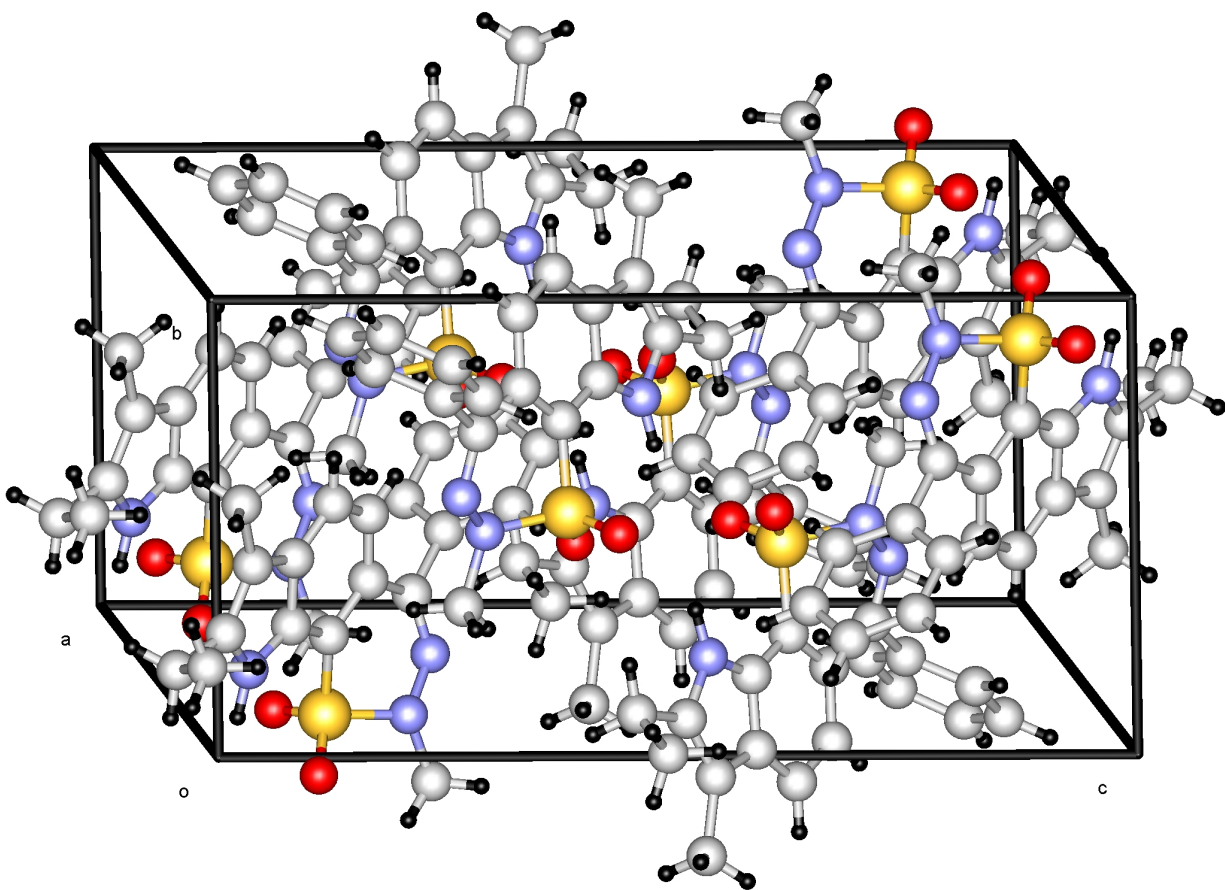

Fig. 4. Packing

## *Experimental*

### Data Collection

A colorless chunk crystal of  $C_{19}H_{19}N_3O_2S$  having approximate dimensions of 0.92 x 0.34 x 0.16 mm was mounted on a cactus needle. All measurements were made on a Rigaku RAXIS RAPID imaging plate area detector with graphite monochromated Cu-K $\alpha$  radiation.

Indexing was performed from 4 oscillations that were exposed for 60 seconds. The crystal-to-detector distance was 127.40 mm.

Cell constants and an orientation matrix for data collection corresponded to a primitive monoclinic cell with dimensions:

$$\begin{aligned}a &= 11.4934(5) \text{ \AA} \\b &= 8.9477(4) \text{ \AA} \quad \beta = 103.493(3)^\circ \\c &= 17.3845(8) \text{ \AA} \\V &= 1738.47(13) \text{ \AA}^3\end{aligned}$$

For  $Z = 4$  and F.W. = 353.44, the calculated density is 1.350 g/cm<sup>3</sup>. The systematic absences of:

$$\begin{aligned}h0l: l \pm 2n \\0k0: k \pm 2n\end{aligned}$$

uniquely determine the space group to be:

$$P2_1/c \text{ (\#14)}$$

The data were collected at a temperature of  $20 \pm 1^\circ\text{C}$  to a maximum  $2\theta$  value of  $143.1^\circ$ . A total of 180 oscillation images were collected. A sweep of data was done using  $\omega$  scans from  $20.0$  to  $200.0^\circ$  in  $5.0^\circ$  step, at  $\chi=0.0^\circ$  and  $\phi = 0.0^\circ$ . The exposure rate was 12.0 [sec./ $^\circ$ ]. A second sweep was performed using  $\omega$  scans from  $20.0$  to  $200.0^\circ$  in  $5.0^\circ$  step, at  $\chi=54.0^\circ$  and  $\phi = 0.0^\circ$ . The exposure rate was 12.0 [sec./ $^\circ$ ]. Another sweep was performed using  $\omega$  scans from  $20.0$  to  $200.0^\circ$  in  $5.0^\circ$  step, at  $\chi=54.0^\circ$  and  $\phi = 90.0^\circ$ . The exposure rate was 12.0 [sec./ $^\circ$ ]. Another sweep was performed using  $\omega$  scans from  $20.0$  to  $200.0^\circ$  in  $5.0^\circ$  step, at  $\chi=54.0^\circ$  and  $\phi = 180.0^\circ$ . The exposure rate was 12.0 [sec./ $^\circ$ ]. Another sweep was performed using  $\omega$  scans from  $20.0$  to  $200.0^\circ$  in  $5.0^\circ$  step, at  $\chi=54.0^\circ$  and  $\phi = 270.0^\circ$ . The exposure rate was 12.0 [sec./ $^\circ$ ]. The crystal-to-detector distance was 127.40 mm. Readout was performed in the 0.100 mm pixel mode.

## Data Reduction

Of the 19734 reflections that were collected, 3328 were unique ( $R_{\text{int}} = 0.106$ ).

The linear absorption coefficient,  $\mu$ , for Cu-K $\alpha$  radiation is 17.988 cm<sup>-1</sup>. An empirical absorption correction was applied which resulted in transmission factors ranging from 0.358 to 0.746. The data were corrected for Lorentz and polarization effects.

## Structure Solution and Refinement

The structure was solved by direct methods<sup>1</sup> and expanded using Fourier techniques<sup>2</sup>. The non-hydrogen atoms were refined anisotropically. Hydrogen atoms were refined using the riding model. The final cycle of full-matrix least-squares refinement<sup>3</sup> on F was based on 10568 observed reflections ( $I > 2.00\sigma(I)$ ) and 245 variable parameters and converged (largest parameter shift was 0.00 times its esd) with unweighted and weighted agreement factors of:

$$R = \Sigma ||F_o| - |F_c|| / \Sigma |F_o| = 0.1199$$

$$R_w = [ \Sigma w (|F_o| - |F_c|)^2 / \Sigma w F_o^2 ]^{1/2} = 0.1559$$

The standard deviation of an observation of unit weight<sup>4</sup> was 8.84. Unit weights were used. Plots of  $\Sigma w (|F_o| - |F_c|)^2$  versus  $|F_o|$ , reflection order in data collection,  $\sin \theta/\lambda$  and various classes of indices showed no unusual trends. The maximum and minimum peaks on the final difference Fourier map corresponded to 7.91 and -9.74 e<sup>-</sup>/Å<sup>3</sup>, respectively.

Neutral atom scattering factors were taken from Cromer and Waber<sup>5</sup>. Anomalous dispersion effects were included in Fcalc<sup>6</sup>; the values for  $\Delta f'$  and  $\Delta f''$  were those of Creagh and McAuley<sup>7</sup>. The values for the mass attenuation coefficients are those of Creagh and Hubbell<sup>8</sup>. All calculations were performed using the CrystalStructure<sup>9,10</sup> crystallographic software package.

## *References*

- (1) SIR92: Altomare, A., Cascarano, G., Giacovazzo, C., Guagliardi, A., Burla, M., Polidori, G., and Camalli, M. (1994) J. Appl. Cryst., 27, 435.
- (2) DIRDIF99: Beurskens, P.T., Admiraal, G., Beurskens, G., Bosman, W.P., de Gelder, R., Israel, R. and Smits, J.M.M.(1999). The DIRDIF-99 program system, Technical Report of the Crystallography Laboratory, University of Nijmegen, The Netherlands.

(3) Least Squares function minimized:

$$\sum w(|F_o| - |F_c|)^2 \quad \text{where } w = \text{Least Squares weights.}$$

(4) Standard deviation of an observation of unit weight:

$$[\sum w(|F_o| - |F_c|)^2 / (N_o - N_v)]^{1/2}$$

where:  $N_o$  = number of observations

$N_v$  = number of variables

(5) Cromer, D. T. & Waber, J. T.; "International Tables for X-ray Crystallography", Vol. IV, The Kynoch Press, Birmingham, England, Table 2.2 A (1974).

(6) Ibers, J. A. & Hamilton, W. C.; Acta Crystallogr., 17, 781 (1964).

(7) Creagh, D. C. & McAuley, W.J. ; "International Tables for Crystallography", Vol C, (A.J.C. Wilson, ed.), Kluwer Academic Publishers, Boston, Table 4.2.6.8, pages 219-222 (1992).

(8) Creagh, D. C. & Hubbell, J.H.; "International Tables for Crystallography", Vol C, (A.J.C. Wilson, ed.), Kluwer Academic Publishers, Boston, Table 4.2.4.3, pages 200-206 (1992).

(9) CrystalStructure 3.7.0: Crystal Structure Analysis Package, Rigaku and Rigaku/MSK (2000-2005). 9009 New Trails Dr. The Woodlands TX 77381 USA.

(10) CRYSTALS Issue 10: Watkin, D.J., Prout, C.K. Carruthers, J.R. & Betteridge, P.W. Chemical Crystallography Laboratory, Oxford, UK. (1996)



## EXPERIMENTAL DETAILS

### A. Crystal Data

|                         |                                                                                                                                                              |
|-------------------------|--------------------------------------------------------------------------------------------------------------------------------------------------------------|
| Empirical Formula       | $\text{C}_{19}\text{H}_{19}\text{N}_3\text{O}_2\text{S}$                                                                                                     |
| Formula Weight          | 353.44                                                                                                                                                       |
| Crystal Color, Habit    | colorless, chunk                                                                                                                                             |
| Crystal Dimensions      | 0.92 X 0.34 X 0.16 mm                                                                                                                                        |
| Crystal System          | monoclinic                                                                                                                                                   |
| Lattice Type            | Primitive                                                                                                                                                    |
| Indexing Images         | 4 oscillations @ 60.0 seconds                                                                                                                                |
| Detector Position       | 127.40 mm                                                                                                                                                    |
| Pixel Size              | 0.100 mm                                                                                                                                                     |
| Lattice Parameters      | $a = 11.4934(5) \text{ \AA}$<br>$b = 8.9477(4) \text{ \AA}$<br>$c = 17.3845(8) \text{ \AA}$<br>$\beta = 103.493(3)^\circ$<br>$V = 1738.47(13) \text{ \AA}^3$ |
| Space Group             | $P2_1/c$ (#14)                                                                                                                                               |
| Z value                 | 4                                                                                                                                                            |
| D <sub>calc</sub>       | 1.350 g/cm <sup>3</sup>                                                                                                                                      |
| F <sub>000</sub>        | 744.00                                                                                                                                                       |
| $\mu(\text{CuK}\alpha)$ | 17.988 cm <sup>-1</sup>                                                                                                                                      |

## B. Intensity Measurements

|                                                           |                                                                       |
|-----------------------------------------------------------|-----------------------------------------------------------------------|
| Diffractometer                                            | Rigaku RAXIS-RAPID                                                    |
| Radiation                                                 | CuK $\alpha$ ( $\lambda$ = 1.54187 Å)<br>graphite monochromated       |
| Detector Aperture                                         | 280 mm x 256 mm                                                       |
| Data Images                                               | 180 exposures                                                         |
| $\omega$ oscillation Range ( $\chi$ =0.0, $\phi$ =0.0)    | 20.0 - 200.0°                                                         |
| Exposure Rate                                             | 12.0 sec./°                                                           |
| $\omega$ oscillation Range ( $\chi$ =54.0, $\phi$ =0.0)   | 20.0 - 200.0°                                                         |
| Exposure Rate                                             | 12.0 sec./°                                                           |
| $\omega$ oscillation Range ( $\chi$ =54.0, $\phi$ =90.0)  | 20.0 - 200.0°                                                         |
| Exposure Rate                                             | 12.0 sec./°                                                           |
| $\omega$ oscillation Range ( $\chi$ =54.0, $\phi$ =180.0) | 20.0 - 200.0°                                                         |
| Exposure Rate                                             | 12.0 sec./°                                                           |
| $\omega$ oscillation Range ( $\chi$ =54.0, $\phi$ =270.0) | 20.0 - 200.0°                                                         |
| Exposure Rate                                             | 12.0 sec./°                                                           |
| Detector Position                                         | 127.40 mm                                                             |
| Pixel Size                                                | 0.100 mm                                                              |
| $2\theta_{\text{max}}$                                    | 143.1°                                                                |
| No. of Reflections Measured                               | Total: 19734<br>Unique: 3328 ( $R_{\text{int}}$ = 0.106)              |
| Corrections                                               | Lorentz-polarization<br>Absorption<br>(trans. factors: 0.358 - 0.746) |

### C. Structure Solution and Refinement

|                                          |                                |
|------------------------------------------|--------------------------------|
| Structure Solution                       | Direct Methods (SIR92)         |
| Refinement                               | Full-matrix least-squares on F |
| Function Minimized                       | $\Sigma w ( Fo  -  Fc )^2$     |
| Least Squares Weights                    | 1                              |
| $2\theta_{\text{max}}$ cutoff            | 143.1 $^{\circ}$               |
| Anomalous Dispersion                     | All non-hydrogen atoms         |
| No. Observations ( $I > 2.00\sigma(I)$ ) | 10568                          |
| No. Variables                            | 245                            |
| Reflection/Parameter Ratio               | 43.13                          |
| Residuals: R ( $I > 2.00\sigma(I)$ )     | 0.1199                         |
| Residuals: Rw ( $I > 2.00\sigma(I)$ )    | 0.1559                         |
| Goodness of Fit Indicator                | 8.838                          |
| Max Shift/Error in Final Cycle           | 0.000                          |
| Maximum peak in Final Diff. Map          | 7.91 e $^{-}/\text{\AA}^3$     |
| Minimum peak in Final Diff. Map          | -9.74 e $^{-}/\text{\AA}^3$    |

Table 1. Atomic coordinates and B<sub>iso</sub>/B<sub>eq</sub>

| atom  | x           | y           | z           | B <sub>eq</sub> |
|-------|-------------|-------------|-------------|-----------------|
| S(1)  | 0.09099(16) | 0.43704(19) | 0.62743(11) | 1.75(3)         |
| O(2)  | -0.0112(3)  | 0.5361(4)   | 0.6073(2)   | 2.86(12)        |
| O(3)  | 0.1790(3)   | 0.4553(4)   | 0.5827(2)   | 1.95(11)        |
| N(1)  | 0.1510(4)   | 0.4579(5)   | 0.7258(3)   | 2.11(14)        |
| N(4)  | -0.1381(4)  | 0.2622(5)   | 0.5169(2)   | 1.74(13)        |
| N(5)  | 0.2384(4)   | 0.3539(5)   | 0.7616(2)   | 1.79(13)        |
| C(1)  | -0.0771(5)  | 0.0392(6)   | 0.5757(3)   | 1.69(16)        |
| C(8)  | -0.0047(5)  | -0.0559(7)  | 0.6280(3)   | 2.34(17)        |
| C(9)  | 0.0929(5)   | -0.0000(7)  | 0.6791(4)   | 2.16(17)        |
| C(10) | 0.0489(5)   | 0.2497(6)   | 0.6281(3)   | 1.54(15)        |
| C(11) | 0.1217(5)   | 0.1534(7)   | 0.6809(3)   | 1.46(15)        |
| C(12) | 0.2223(5)   | 0.2173(7)   | 0.7407(3)   | 1.58(16)        |
| C(13) | -0.1877(5)  | 0.0172(7)   | 0.5168(3)   | 1.92(17)        |
| C(14) | -0.2210(5)  | 0.1548(7)   | 0.4819(3)   | 1.79(17)        |
| C(15) | 0.3140(5)   | 0.1107(6)   | 0.7882(4)   | 2.09(17)        |
| C(16) | -0.2512(5)  | -0.1357(6)  | 0.4977(4)   | 3.4(2)          |
| C(17) | -0.0516(5)  | 0.1948(6)   | 0.5744(3)   | 1.52(16)        |
| C(18) | -0.3241(5)  | 0.2007(7)   | 0.4150(3)   | 2.65(18)        |
| C(19) | 0.4158(6)   | 0.0749(7)   | 0.7584(4)   | 2.81(19)        |
| C(20) | 0.5021(6)   | -0.0227(8)  | 0.8021(5)   | 3.3(2)          |
| C(21) | 0.1787(6)   | 0.6130(6)   | 0.7536(4)   | 3.6(2)          |
| C(22) | -0.4476(5)  | 0.1539(7)   | 0.4330(3)   | 3.33(19)        |
| C(23) | 0.2946(6)   | 0.0515(8)   | 0.8610(4)   | 3.6(2)          |
| C(24) | 0.4865(7)   | -0.0844(9)  | 0.8723(5)   | 4.8(2)          |
| C(25) | 0.3843(7)   | -0.0457(9)  | 0.9031(4)   | 4.9(2)          |
| H(1)  | -0.1402     | 0.3654      | 0.5037      | 1.93            |
| H(2)  | -0.0233     | -0.1594     | 0.6274      | 2.69            |
| H(3)  | 0.1439      | -0.0655     | 0.7148      | 2.44            |
| H(4)  | 0.4243      | 0.1175      | 0.7100      | 3.41            |
| H(5)  | 0.5709      | -0.0474     | 0.7833      | 4.04            |
| H(6)  | 0.2251      | 0.0762      | 0.8791      | 4.35            |
| H(7)  | 0.5455      | -0.1504     | 0.9013      | 5.38            |
| H(8)  | 0.3767      | -0.0880     | 0.9518      | 5.70            |
| H(9)  | -0.3233     | 0.3059      | 0.4078      | 2.85            |
| H(10) | -0.3161     | 0.1523      | 0.3679      | 2.85            |
| H(11) | -0.2224     | -0.1831     | 0.4569      | 3.70            |
| H(12) | -0.3351     | -0.1208     | 0.4806      | 3.71            |

Table 1. Atomic coordinates and  $B_{\text{iso}}/B_{\text{eq}}$  (continued)

| atom  | x       | y       | z      | $B_{\text{eq}}$ |
|-------|---------|---------|--------|-----------------|
| H(13) | -0.2346 | -0.1969 | 0.5436 | 3.71            |
| H(14) | 0.2582  | 0.6370  | 0.7508 | 3.98            |
| H(15) | 0.1714  | 0.6218  | 0.8067 | 3.97            |
| H(16) | 0.1245  | 0.6799  | 0.7210 | 3.98            |
| H(17) | -0.4680 | 0.0556  | 0.4138 | 3.69            |
| H(18) | -0.5088 | 0.2214  | 0.4083 | 3.69            |
| H(19) | -0.4397 | 0.1560  | 0.4886 | 3.70            |

$$B_{\text{eq}} = 8/3 \pi^2 (U_{11}(aa^*)^2 + U_{22}(bb^*)^2 + U_{33}(cc^*)^2 + 2U_{12}(aa^*bb^*)\cos \gamma + 2U_{13}(aa^*cc^*)\cos \beta + 2U_{23}(bb^*cc^*)\cos \alpha)$$

Table 2. Anisotropic displacement parameters

| atom  | U <sub>11</sub> | U <sub>22</sub> | U <sub>33</sub> | U <sub>12</sub> | U <sub>13</sub> | U <sub>23</sub> |
|-------|-----------------|-----------------|-----------------|-----------------|-----------------|-----------------|
| S(1)  | 0.0229(9)       | 0.0124(9)       | 0.0296(11)      | -0.0022(9)      | 0.0025(8)       | 0.0039(9)       |
| O(2)  | 0.033(2)        | 0.004(2)        | 0.061(3)        | -0.002(2)       | -0.009(2)       | 0.011(2)        |
| O(3)  | 0.032(2)        | 0.027(2)        | 0.023(2)        | -0.006(2)       | 0.021(2)        | 0.006(2)        |
| N(1)  | 0.026(3)        | 0.009(3)        | 0.044(4)        | -0.002(2)       | 0.005(2)        | -0.002(3)       |
| N(4)  | 0.023(3)        | -0.002(2)       | 0.040(4)        | -0.009(2)       | -0.003(2)       | 0.005(2)        |
| N(5)  | 0.017(3)        | 0.014(3)        | 0.032(3)        | 0.004(2)        | -0.005(2)       | 0.004(2)        |
| C(1)  | 0.021(3)        | 0.008(3)        | 0.031(4)        | -0.006(3)       | -0.003(3)       | 0.000(3)        |
| C(8)  | 0.031(4)        | 0.007(3)        | 0.047(5)        | -0.002(3)       | 0.001(3)        | 0.001(3)        |
| C(9)  | 0.022(4)        | 0.008(3)        | 0.048(5)        | 0.006(3)        | -0.001(3)       | 0.008(3)        |
| C(10) | 0.021(3)        | -0.004(3)       | 0.040(4)        | -0.006(2)       | 0.004(3)        | 0.001(3)        |
| C(11) | 0.013(3)        | 0.015(4)        | 0.026(4)        | 0.005(3)        | 0.001(3)        | 0.006(3)        |
| C(12) | 0.013(3)        | 0.014(4)        | 0.032(4)        | 0.008(3)        | 0.004(3)        | 0.012(3)        |
| C(13) | 0.023(4)        | 0.020(4)        | 0.029(4)        | -0.001(3)       | 0.004(3)        | -0.001(3)       |
| C(14) | 0.021(4)        | 0.023(4)        | 0.027(4)        | -0.002(3)       | 0.011(3)        | 0.005(3)        |
| C(15) | 0.018(4)        | 0.005(3)        | 0.047(5)        | 0.001(3)        | -0.012(3)       | -0.009(3)       |
| C(16) | 0.030(4)        | 0.023(4)        | 0.064(6)        | 0.004(3)        | -0.011(4)       | -0.011(4)       |
| C(17) | 0.027(4)        | 0.004(3)        | 0.030(4)        | -0.006(3)       | 0.012(3)        | 0.005(3)        |
| C(18) | 0.035(4)        | 0.028(4)        | 0.027(4)        | -0.007(3)       | -0.014(3)       | 0.004(3)        |
| C(19) | 0.037(4)        | 0.034(5)        | 0.037(5)        | 0.009(4)        | 0.011(4)        | -0.003(4)       |
| C(20) | 0.033(5)        | 0.037(5)        | 0.057(6)        | 0.014(4)        | 0.017(4)        | -0.008(4)       |
| C(21) | 0.057(5)        | 0.004(4)        | 0.064(6)        | -0.001(3)       | -0.006(4)       | -0.008(3)       |
| C(22) | 0.014(4)        | 0.053(5)        | 0.050(5)        | 0.003(3)        | -0.013(3)       | 0.002(4)        |
| C(23) | 0.036(5)        | 0.069(6)        | 0.033(5)        | 0.010(4)        | 0.008(4)        | 0.028(4)        |
| C(24) | 0.028(5)        | 0.051(6)        | 0.092(8)        | 0.021(4)        | -0.011(5)       | 0.017(5)        |
| C(25) | 0.070(6)        | 0.063(6)        | 0.048(6)        | -0.001(5)       | -0.000(5)       | 0.043(5)        |

The general temperature factor expression:  $\exp(-2\pi^2(a^2U_{11}h^2 + b^2U_{22}k^2 + c^2U_{33}l^2 + 2a*b*U_{12}hk + 2a*c*U_{13}hl + 2b*c*U_{23}kl))$

Table 3. Bond lengths (Å)

| atom  | atom  | distance  | atom  | atom  | distance  |
|-------|-------|-----------|-------|-------|-----------|
| S(1)  | O(2)  | 1.448(4)  | S(1)  | O(3)  | 1.422(4)  |
| S(1)  | N(1)  | 1.698(5)  | S(1)  | C(10) | 1.745(5)  |
| N(1)  | N(5)  | 1.404(6)  | N(1)  | C(21) | 1.480(7)  |
| N(4)  | C(14) | 1.389(7)  | N(4)  | C(17) | 1.374(7)  |
| N(4)  | H(1)  | 0.950     | N(5)  | C(12) | 1.277(8)  |
| C(1)  | C(8)  | 1.374(8)  | C(1)  | C(13) | 1.448(8)  |
| C(1)  | C(17) | 1.425(8)  | C(8)  | C(9)  | 1.354(8)  |
| C(8)  | H(2)  | 0.950     | C(9)  | C(11) | 1.411(8)  |
| C(9)  | H(3)  | 0.950     | C(10) | C(11) | 1.388(8)  |
| C(10) | C(17) | 1.394(8)  | C(11) | C(12) | 1.477(8)  |
| C(12) | C(15) | 1.516(8)  | C(13) | C(14) | 1.386(9)  |
| C(13) | C(16) | 1.549(8)  | C(14) | C(18) | 1.511(8)  |
| C(15) | C(19) | 1.421(10) | C(15) | C(23) | 1.436(11) |
| C(16) | H(11) | 0.950     | C(16) | H(12) | 0.950     |
| C(16) | H(13) | 0.950     | C(18) | C(22) | 1.581(9)  |
| C(18) | H(9)  | 0.950     | C(18) | H(10) | 0.950     |
| C(19) | C(20) | 1.404(9)  | C(19) | H(4)  | 0.950     |
| C(20) | C(24) | 1.388(13) | C(20) | H(5)  | 0.950     |
| C(21) | H(14) | 0.950     | C(21) | H(15) | 0.950     |
| C(21) | H(16) | 0.950     | C(22) | H(17) | 0.950     |
| C(22) | H(18) | 0.950     | C(22) | H(19) | 0.950     |
| C(23) | C(25) | 1.415(10) | C(23) | H(6)  | 0.950     |
| C(24) | C(25) | 1.442(13) | C(24) | H(7)  | 0.950     |
| C(25) | H(8)  | 0.950     |       |       |           |

Table 4. Bond angles ( $^{\circ}$ )

| atom  | atom  | atom  | angle    | atom  | atom  | atom  | angle    |
|-------|-------|-------|----------|-------|-------|-------|----------|
| O(2)  | S(1)  | O(3)  | 116.0(2) | O(2)  | S(1)  | N(1)  | 107.0(2) |
| O(2)  | S(1)  | C(10) | 112.3(2) | O(3)  | S(1)  | N(1)  | 111.4(2) |
| O(3)  | S(1)  | C(10) | 110.4(3) | N(1)  | S(1)  | C(10) | 98.4(2)  |
| S(1)  | N(1)  | N(5)  | 117.0(4) | S(1)  | N(1)  | C(21) | 115.9(4) |
| N(5)  | N(1)  | C(21) | 113.6(4) | C(14) | N(4)  | C(17) | 108.7(4) |
| C(14) | N(4)  | H(1)  | 126.2    | C(17) | N(4)  | H(1)  | 125.1    |
| N(1)  | N(5)  | C(12) | 117.9(4) | C(8)  | C(1)  | C(13) | 132.8(5) |
| C(8)  | C(1)  | C(17) | 121.4(5) | C(13) | C(1)  | C(17) | 105.8(5) |
| C(1)  | C(8)  | C(9)  | 119.1(5) | C(1)  | C(8)  | H(2)  | 119.8    |
| C(9)  | C(8)  | H(2)  | 121.1    | C(8)  | C(9)  | C(11) | 121.9(5) |
| C(8)  | C(9)  | H(3)  | 119.5    | C(11) | C(9)  | H(3)  | 118.7    |
| S(1)  | C(10) | C(11) | 118.4(4) | S(1)  | C(10) | C(17) | 121.4(4) |
| C(11) | C(10) | C(17) | 120.1(5) | C(9)  | C(11) | C(10) | 119.2(5) |
| C(9)  | C(11) | C(12) | 122.2(5) | C(10) | C(11) | C(12) | 118.5(5) |
| N(5)  | C(12) | C(11) | 127.5(5) | N(5)  | C(12) | C(15) | 114.3(5) |
| C(11) | C(12) | C(15) | 118.1(5) | C(1)  | C(13) | C(14) | 107.2(5) |
| C(1)  | C(13) | C(16) | 124.3(5) | C(14) | C(13) | C(16) | 128.5(5) |
| N(4)  | C(14) | C(13) | 109.4(4) | N(4)  | C(14) | C(18) | 118.9(5) |
| C(13) | C(14) | C(18) | 131.7(5) | C(12) | C(15) | C(19) | 118.0(6) |
| C(12) | C(15) | C(23) | 118.7(6) | C(19) | C(15) | C(23) | 123.2(5) |
| C(13) | C(16) | H(11) | 109.0    | C(13) | C(16) | H(12) | 109.6    |
| C(13) | C(16) | H(13) | 109.7    | H(11) | C(16) | H(12) | 109.5    |
| H(11) | C(16) | H(13) | 109.5    | H(12) | C(16) | H(13) | 109.5    |
| N(4)  | C(17) | C(1)  | 108.9(4) | N(4)  | C(17) | C(10) | 132.8(5) |
| C(1)  | C(17) | C(10) | 118.4(5) | C(14) | C(18) | C(22) | 110.8(5) |
| C(14) | C(18) | H(9)  | 109.9    | C(14) | C(18) | H(10) | 108.9    |
| C(22) | C(18) | H(9)  | 109.0    | C(22) | C(18) | H(10) | 108.8    |
| H(9)  | C(18) | H(10) | 109.5    | C(15) | C(19) | C(20) | 118.7(6) |
| C(15) | C(19) | H(4)  | 119.8    | C(20) | C(19) | H(4)  | 121.5    |
| C(19) | C(20) | C(24) | 120.2(7) | C(19) | C(20) | H(5)  | 119.9    |
| C(24) | C(20) | H(5)  | 119.9    | N(1)  | C(21) | H(14) | 109.4    |
| N(1)  | C(21) | H(15) | 109.5    | N(1)  | C(21) | H(16) | 109.6    |
| H(14) | C(21) | H(15) | 109.5    | H(14) | C(21) | H(16) | 109.5    |
| H(15) | C(21) | H(16) | 109.5    | C(18) | C(22) | H(17) | 109.6    |
| C(18) | C(22) | H(18) | 110.2    | C(18) | C(22) | H(19) | 108.6    |
| H(17) | C(22) | H(18) | 109.5    | H(17) | C(22) | H(19) | 109.5    |
| H(18) | C(22) | H(19) | 109.5    | C(15) | C(23) | C(25) | 115.9(7) |



Table 4. Bond angles ( $^{\circ}$ ) (continued)

| atom  | atom  | atom  | angle    | atom  | atom  | atom  | angle    |
|-------|-------|-------|----------|-------|-------|-------|----------|
| C(15) | C(23) | H(6)  | 121.4    | C(25) | C(23) | H(6)  | 122.7    |
| C(20) | C(24) | C(25) | 120.9(7) | C(20) | C(24) | H(7)  | 119.4    |
| C(25) | C(24) | H(7)  | 119.7    | C(23) | C(25) | C(24) | 121.0(7) |
| C(23) | C(25) | H(8)  | 119.9    | C(24) | C(25) | H(8)  | 119.1    |

Table 5. Torsion Angles( $^{\circ}$ )

| atom1 | atom2 | atom3 | atom4 | angle     | atom1 | atom2 | atom3 | atom4 | angle     |
|-------|-------|-------|-------|-----------|-------|-------|-------|-------|-----------|
| O(2)  | S(1)  | N(1)  | N(5)  | 169.1(4)  | O(2)  | S(1)  | N(1)  | C(21) | -52.6(5)  |
| O(2)  | S(1)  | C(10) | C(11) | -148.0(5) | O(2)  | S(1)  | C(10) | C(17) | 35.5(7)   |
| O(3)  | S(1)  | N(1)  | N(5)  | -63.3(4)  | O(3)  | S(1)  | N(1)  | C(21) | 75.1(5)   |
| O(3)  | S(1)  | C(10) | C(11) | 81.0(6)   | O(3)  | S(1)  | C(10) | C(17) | -95.5(6)  |
| N(1)  | S(1)  | C(10) | C(11) | -35.6(6)  | N(1)  | S(1)  | C(10) | C(17) | 147.9(6)  |
| C(10) | S(1)  | N(1)  | N(5)  | 52.6(4)   | C(10) | S(1)  | N(1)  | C(21) | -169.1(4) |
| S(1)  | N(1)  | N(5)  | C(12) | -40.1(7)  | C(21) | N(1)  | N(5)  | C(12) | -179.4(6) |
| C(14) | N(4)  | C(17) | C(1)  | 1.5(7)    | C(14) | N(4)  | C(17) | C(10) | -178.0(7) |
| C(17) | N(4)  | C(14) | C(13) | -0.2(6)   | C(17) | N(4)  | C(14) | C(18) | -178.6(6) |
| N(1)  | N(5)  | C(12) | C(11) | 1.3(10)   | N(1)  | N(5)  | C(12) | C(15) | -174.0(5) |
| C(8)  | C(1)  | C(13) | C(14) | 179.4(7)  | C(8)  | C(1)  | C(13) | C(16) | -1.9(12)  |
| C(13) | C(1)  | C(8)  | C(9)  | -177.3(7) | C(8)  | C(1)  | C(17) | N(4)  | -180(179) |
| C(8)  | C(1)  | C(17) | C(10) | -0.4(9)   | C(17) | C(1)  | C(8)  | C(9)  | -0.2(8)   |
| C(13) | C(1)  | C(17) | N(4)  | -2.1(7)   | C(13) | C(1)  | C(17) | C(10) | 177.5(6)  |
| C(17) | C(1)  | C(13) | C(14) | 1.9(8)    | C(17) | C(1)  | C(13) | C(16) | -179.4(6) |
| C(1)  | C(8)  | C(9)  | C(11) | 0.8(11)   | C(8)  | C(9)  | C(11) | C(10) | -0.8(10)  |
| C(8)  | C(9)  | C(11) | C(12) | 174.9(6)  | S(1)  | C(10) | C(11) | C(9)  | -176.3(5) |
| S(1)  | C(10) | C(11) | C(12) | 7.9(9)    | S(1)  | C(10) | C(17) | N(4)  | -3.8(11)  |
| S(1)  | C(10) | C(17) | C(1)  | 176.7(5)  | C(11) | C(10) | C(17) | N(4)  | 179.8(6)  |
| C(11) | C(10) | C(17) | C(1)  | 0.3(8)    | C(17) | C(10) | C(11) | C(9)  | 0.2(8)    |
| C(17) | C(10) | C(11) | C(12) | -175.6(6) | C(9)  | C(11) | C(12) | N(5)  | -160.1(7) |
| C(9)  | C(11) | C(12) | C(15) | 15.0(10)  | C(10) | C(11) | C(12) | N(5)  | 15.6(11)  |
| C(10) | C(11) | C(12) | C(15) | -169.3(6) | N(5)  | C(12) | C(15) | C(19) | -93.5(7)  |
| N(5)  | C(12) | C(15) | C(23) | 86.1(7)   | C(11) | C(12) | C(15) | C(19) | 90.7(7)   |
| C(11) | C(12) | C(15) | C(23) | -89.6(8)  | C(1)  | C(13) | C(14) | N(4)  | -1.1(8)   |
| C(1)  | C(13) | C(14) | C(18) | 176.9(7)  | C(16) | C(13) | C(14) | N(4)  | -179.7(6) |
| C(16) | C(13) | C(14) | C(18) | -1.6(13)  | N(4)  | C(14) | C(18) | C(22) | -126.0(6) |
| C(13) | C(14) | C(18) | C(22) | 56.1(10)  | C(12) | C(15) | C(19) | C(20) | 179.5(5)  |
| C(12) | C(15) | C(23) | C(25) | -179.2(6) | C(19) | C(15) | C(23) | C(25) | 0.5(9)    |
| C(23) | C(15) | C(19) | C(20) | -0.2(7)   | C(15) | C(19) | C(20) | C(24) | 1.0(10)   |
| C(19) | C(20) | C(24) | C(25) | -2.2(11)  | C(15) | C(23) | C(25) | C(24) | -1.6(10)  |
| C(20) | C(24) | C(25) | C(23) | 2.5(11)   |       |       |       |       |           |

The sign is positive if when looking from atom 2 to atom 3 a clock-wise motion of atom 1 would superimpose it on atom 4.

Table 6. Distances beyond the asymmetric unit out to 3.60 Å

| atom | atom                | distance | atom | atom                | distance |
|------|---------------------|----------|------|---------------------|----------|
| S(1) | N(4)                | 3.273(4) | S(1) | N(5)                | 2.650(4) |
| S(1) | C(11)               | 2.697(6) | S(1) | C(12)               | 2.939(6) |
| S(1) | C(17)               | 2.743(6) | S(1) | C(21)               | 2.697(6) |
| S(1) | H(1)                | 3.071    | S(1) | H(1) <sup>1)</sup>  | 3.040    |
| S(1) | H(11) <sup>2)</sup> | 3.260    | S(1) | H(14)               | 3.094    |
| S(1) | H(15)               | 3.457    | S(1) | H(16)               | 2.688    |
| O(2) | O(3)                | 2.433(6) | O(2) | O(3) <sup>1)</sup>  | 3.415(5) |
| O(2) | N(1)                | 2.534(6) | O(2) | N(4)                | 3.088(5) |
| O(2) | N(4) <sup>1)</sup>  | 3.548(7) | O(2) | C(10)               | 2.657(6) |
| O(2) | C(17)               | 3.121(6) | O(2) | C(21)               | 3.019(7) |
| O(2) | C(23) <sup>3)</sup> | 3.430(8) | O(2) | H(1)                | 2.555    |
| O(2) | H(1) <sup>1)</sup>  | 3.016    | O(2) | H(2) <sup>4)</sup>  | 2.755    |
| O(2) | H(6) <sup>3)</sup>  | 2.549    | O(2) | H(13) <sup>4)</sup> | 3.493    |
| O(2) | H(16)               | 2.561    | O(3) | O(2)                | 2.433(6) |
| O(3) | O(2) <sup>1)</sup>  | 3.415(5) | O(3) | N(1)                | 2.582(7) |
| O(3) | N(4) <sup>1)</sup>  | 3.038(6) | O(3) | N(5)                | 3.158(6) |
| O(3) | C(10)               | 2.607(7) | O(3) | C(11)               | 3.342(7) |
| O(3) | C(12)               | 3.419(7) | O(3) | C(16) <sup>2)</sup> | 3.371(7) |
| O(3) | C(17)               | 3.507(7) | O(3) | C(18) <sup>1)</sup> | 3.496(7) |
| O(3) | C(21)               | 3.289(8) | O(3) | H(1) <sup>1)</sup>  | 2.172    |
| O(3) | H(5) <sup>5)</sup>  | 3.251    | O(3) | H(7) <sup>5)</sup>  | 3.254    |
| O(3) | H(9) <sup>1)</sup>  | 2.686    | O(3) | H(11) <sup>2)</sup> | 2.611    |
| O(3) | H(13) <sup>2)</sup> | 3.352    | O(3) | H(14)               | 3.282    |
| O(3) | H(16)               | 3.303    | N(1) | O(2)                | 2.534(6) |
| N(1) | O(3)                | 2.582(7) | N(1) | C(8) <sup>3)</sup>  | 3.362(9) |
| N(1) | C(9) <sup>3)</sup>  | 3.591(9) | N(1) | C(10)               | 2.608(7) |
| N(1) | C(11)               | 2.833(8) | N(1) | C(12)               | 2.297(8) |
| N(1) | H(2) <sup>3)</sup>  | 3.393    | N(1) | H(5) <sup>5)</sup>  | 3.237    |
| N(1) | H(14)               | 2.006    | N(1) | H(15)               | 2.007    |
| N(1) | H(16)               | 2.009    | N(4) | S(1)                | 3.273(4) |
| N(4) | O(2)                | 3.088(5) | N(4) | O(2) <sup>1)</sup>  | 3.548(7) |
| N(4) | O(3) <sup>1)</sup>  | 3.038(6) | N(4) | C(1)                | 2.277(7) |
| N(4) | C(8)                | 3.577(7) | N(4) | C(10)               | 2.537(7) |
| N(4) | C(13)               | 2.265(8) | N(4) | C(18)               | 2.498(7) |
| N(4) | H(2) <sup>2)</sup>  | 3.571    | N(4) | H(8) <sup>3)</sup>  | 3.212    |
| N(4) | H(9)                | 2.528    | N(4) | H(10)               | 3.064    |
| N(4) | H(15) <sup>6)</sup> | 3.418    | N(4) | H(19)               | 3.517    |

Table 6. Distances beyond the asymmetric unit out to 3.60 Å (continued)

| atom  | atom                | distance  | atom  | atom                | distance  |
|-------|---------------------|-----------|-------|---------------------|-----------|
| N(5)  | S(1)                | 2.650(4)  | N(5)  | O(3)                | 3.158(6)  |
| N(5)  | C(10)               | 2.939(7)  | N(5)  | C(11)               | 2.472(7)  |
| N(5)  | C(15)               | 2.350(8)  | N(5)  | C(19)               | 3.232(8)  |
| N(5)  | C(20) <sup>5j</sup> | 3.590(9)  | N(5)  | C(21)               | 2.412(7)  |
| N(5)  | C(23)               | 3.194(9)  | N(5)  | H(2) <sup>3j</sup>  | 3.473     |
| N(5)  | H(4)                | 3.278     | N(5)  | H(5) <sup>5j</sup>  | 2.645     |
| N(5)  | H(6)                | 3.242     | N(5)  | H(13) <sup>3j</sup> | 3.426     |
| N(5)  | H(14)               | 2.553     | N(5)  | H(15)               | 2.689     |
| N(5)  | H(16)               | 3.208     | N(5)  | H(18) <sup>7j</sup> | 3.456     |
| C(1)  | N(4)                | 2.277(7)  | C(1)  | C(1) <sup>2j</sup>  | 3.568(10) |
| C(1)  | C(9)                | 2.352(8)  | C(1)  | C(10)               | 2.421(8)  |
| C(1)  | C(11)               | 2.768(8)  | C(1)  | C(14)               | 2.281(8)  |
| C(1)  | C(16)               | 2.650(8)  | C(1)  | C(21) <sup>6j</sup> | 3.498(10) |
| C(1)  | H(1)                | 3.192     | C(1)  | H(2)                | 2.022     |
| C(1)  | H(3)                | 3.211     | C(1)  | H(11)               | 3.066     |
| C(1)  | H(12)               | 3.360     | C(1)  | H(13)               | 2.753     |
| C(1)  | H(15) <sup>6j</sup> | 2.634     | C(8)  | N(1) <sup>6j</sup>  | 3.362(9)  |
| C(8)  | N(4)                | 3.577(7)  | C(8)  | C(10)               | 2.803(8)  |
| C(8)  | C(11)               | 2.417(8)  | C(8)  | C(13)               | 2.586(8)  |
| C(8)  | C(16)               | 3.266(8)  | C(8)  | C(17)               | 2.440(8)  |
| C(8)  | C(21) <sup>6j</sup> | 3.528(10) | C(8)  | H(3)                | 2.000     |
| C(8)  | H(11)               | 3.595     | C(8)  | H(13)               | 2.986     |
| C(8)  | H(15) <sup>6j</sup> | 2.916     | C(8)  | H(16) <sup>8j</sup> | 3.048     |
| C(9)  | N(1) <sup>6j</sup>  | 3.591(9)  | C(9)  | C(1)                | 2.352(8)  |
| C(9)  | C(10)               | 2.413(8)  | C(9)  | C(12)               | 2.529(8)  |
| C(9)  | C(15)               | 2.965(8)  | C(9)  | C(17)               | 2.775(8)  |
| C(9)  | C(23)               | 3.488(8)  | C(9)  | H(2)                | 2.016     |
| C(9)  | H(6)                | 3.521     | C(9)  | H(10) <sup>2j</sup> | 3.175     |
| C(9)  | H(11) <sup>2j</sup> | 3.483     | C(9)  | H(15) <sup>6j</sup> | 3.291     |
| C(9)  | H(16) <sup>8j</sup> | 2.956     | C(10) | O(2)                | 2.657(6)  |
| C(10) | O(3)                | 2.607(7)  | C(10) | N(1)                | 2.608(7)  |
| C(10) | N(4)                | 2.537(7)  | C(10) | N(5)                | 2.939(7)  |
| C(10) | C(1)                | 2.421(8)  | C(10) | C(8)                | 2.803(8)  |
| C(10) | C(9)                | 2.413(8)  | C(10) | C(12)               | 2.463(7)  |
| C(10) | H(1)                | 2.878     | C(10) | H(3)                | 3.263     |
| C(10) | H(11) <sup>2j</sup> | 2.810     | C(10) | H(15) <sup>6j</sup> | 3.217     |
| C(11) | S(1)                | 2.697(6)  | C(11) | O(3)                | 3.342(7)  |

Table 6. Distances beyond the asymmetric unit out to 3.60 Å (continued)

| atom  | atom                | distance  | atom  | atom                | distance |
|-------|---------------------|-----------|-------|---------------------|----------|
| C(11) | N(1)                | 2.833(8)  | C(11) | N(5)                | 2.472(7) |
| C(11) | C(1)                | 2.768(8)  | C(11) | C(8)                | 2.417(8) |
| C(11) | C(15)               | 2.567(8)  | C(11) | C(17)               | 2.411(8) |
| C(11) | C(19)               | 3.407(8)  | C(11) | C(23)               | 3.418(8) |
| C(11) | H(2)                | 3.279     | C(11) | H(3)                | 2.044    |
| C(11) | H(4)                | 3.410     | C(11) | H(6)                | 3.442    |
| C(11) | H(11) <sup>2j</sup> | 2.906     | C(11) | H(15) <sup>6j</sup> | 3.438    |
| C(12) | S(1)                | 2.939(6)  | C(12) | O(3)                | 3.419(7) |
| C(12) | N(1)                | 2.297(8)  | C(12) | C(9)                | 2.529(8) |
| C(12) | C(10)               | 2.463(7)  | C(12) | C(19)               | 2.519(9) |
| C(12) | C(21)               | 3.591(8)  | C(12) | C(23)               | 2.540(9) |
| C(12) | H(3)                | 2.688     | C(12) | H(4)                | 2.656    |
| C(12) | H(5) <sup>5j</sup>  | 3.274     | C(12) | H(6)                | 2.710    |
| C(12) | H(11) <sup>2j</sup> | 3.450     | C(13) | N(4)                | 2.265(8) |
| C(13) | C(8)                | 2.586(8)  | C(13) | C(17)               | 2.291(8) |
| C(13) | C(18)               | 2.644(8)  | C(13) | C(22)               | 3.242(8) |
| C(13) | H(1)                | 3.180     | C(13) | H(2)                | 2.841    |
| C(13) | H(9)                | 3.364     | C(13) | H(10)               | 2.926    |
| C(13) | H(11)               | 2.064     | C(13) | H(12)               | 2.072    |
| C(13) | H(13)               | 2.072     | C(13) | H(15) <sup>6j</sup> | 3.171    |
| C(13) | H(17)               | 3.318     | C(13) | H(19)               | 3.084    |
| C(14) | C(1)                | 2.281(8)  | C(14) | C(16)               | 2.645(9) |
| C(14) | C(17)               | 2.246(8)  | C(14) | C(22)               | 2.545(8) |
| C(14) | H(1)                | 2.096     | C(14) | H(8) <sup>3j</sup>  | 3.285    |
| C(14) | H(9)                | 2.040     | C(14) | H(10)               | 2.029    |
| C(14) | H(11)               | 3.054     | C(14) | H(12)               | 2.791    |
| C(14) | H(13)               | 3.340     | C(14) | H(15) <sup>6j</sup> | 3.597    |
| C(14) | H(17)               | 2.946     | C(14) | H(18)               | 3.310    |
| C(14) | H(19)               | 2.544     | C(15) | N(5)                | 2.350(8) |
| C(15) | C(9)                | 2.965(8)  | C(15) | C(11)               | 2.567(8) |
| C(15) | C(20)               | 2.431(9)  | C(15) | C(24)               | 2.786(9) |
| C(15) | C(25)               | 2.417(10) | C(15) | H(3)                | 2.602    |
| C(15) | H(4)                | 2.065     | C(15) | H(5)                | 3.293    |
| C(15) | H(6)                | 2.095     | C(15) | H(8)                | 3.287    |
| C(15) | H(10) <sup>2j</sup> | 3.596     | C(15) | H(18) <sup>7j</sup> | 2.963    |
| C(16) | O(3) <sup>2j</sup>  | 3.371(7)  | C(16) | C(1)                | 2.650(8) |
| C(16) | C(8)                | 3.266(8)  | C(16) | C(14)               | 2.645(9) |

Table 6. Distances beyond the asymmetric unit out to 3.60 Å (continued)

| atom  | atom                | distance  | atom  | atom                 | distance  |
|-------|---------------------|-----------|-------|----------------------|-----------|
| C(16) | C(18)               | 3.357(8)  | C(16) | C(22)                | 3.448(8)  |
| C(16) | H(2)                | 3.038     | C(16) | H(6) <sup>6j</sup>   | 3.320     |
| C(16) | H(7) <sup>9j</sup>  | 3.179     | C(16) | H(10)                | 3.392     |
| C(16) | H(17)               | 3.094     | C(16) | H(19)                | 3.372     |
| C(17) | S(1)                | 2.743(6)  | C(17) | O(2)                 | 3.121(6)  |
| C(17) | O(3)                | 3.507(7)  | C(17) | C(8)                 | 2.440(8)  |
| C(17) | C(9)                | 2.775(8)  | C(17) | C(11)                | 2.411(8)  |
| C(17) | C(13)               | 2.291(8)  | C(17) | C(14)                | 2.246(8)  |
| C(17) | H(1)                | 2.072     | C(17) | H(2)                 | 3.295     |
| C(17) | H(11) <sup>2j</sup> | 3.321     | C(17) | H(15) <sup>6j</sup>  | 2.815     |
| C(18) | O(3) <sup>1j</sup>  | 3.496(7)  | C(18) | N(4)                 | 2.498(7)  |
| C(18) | C(13)               | 2.644(8)  | C(18) | C(16)                | 3.357(8)  |
| C(18) | H(1)                | 2.738     | C(18) | H(8) <sup>3j</sup>   | 3.156     |
| C(18) | H(12)               | 3.108     | C(18) | H(14) <sup>1j</sup>  | 3.466     |
| C(18) | H(17)               | 2.099     | C(18) | H(18)                | 2.107     |
| C(18) | H(19)               | 2.088     | C(19) | N(5)                 | 3.232(8)  |
| C(19) | C(11)               | 3.407(8)  | C(19) | C(12)                | 2.519(9)  |
| C(19) | C(23)               | 2.514(11) | C(19) | C(24)                | 2.420(11) |
| C(19) | C(25)               | 2.835(11) | C(19) | H(3)                 | 3.288     |
| C(19) | H(5)                | 2.050     | C(19) | H(5) <sup>5j</sup>   | 3.468     |
| C(19) | H(6)                | 3.368     | C(19) | H(7)                 | 3.275     |
| C(19) | H(10) <sup>2j</sup> | 3.015     | C(19) | H(17) <sup>2j</sup>  | 3.396     |
| C(19) | H(18) <sup>7j</sup> | 3.131     | C(20) | N(5) <sup>10j</sup>  | 3.590(9)  |
| C(20) | C(15)               | 2.431(9)  | C(20) | C(23)                | 2.884(11) |
| C(20) | C(25)               | 2.463(13) | C(20) | H(4)                 | 2.066     |
| C(20) | H(4) <sup>10j</sup> | 3.348     | C(20) | H(7)                 | 2.031     |
| C(20) | H(8)                | 3.307     | C(20) | H(9) <sup>7j</sup>   | 3.074     |
| C(20) | H(10) <sup>2j</sup> | 3.420     | C(20) | H(14) <sup>10j</sup> | 3.415     |
| C(20) | H(18) <sup>7j</sup> | 3.286     | C(21) | S(1)                 | 2.697(6)  |
| C(21) | O(2)                | 3.019(7)  | C(21) | O(3)                 | 3.289(8)  |
| C(21) | N(5)                | 2.412(7)  | C(21) | C(1) <sup>3j</sup>   | 3.498(10) |
| C(21) | C(8) <sup>3j</sup>  | 3.528(10) | C(21) | C(12)                | 3.591(8)  |
| C(21) | H(2) <sup>4j</sup>  | 3.460     | C(21) | H(3) <sup>4j</sup>   | 2.960     |
| C(21) | H(5) <sup>5j</sup>  | 3.408     | C(21) | H(10) <sup>1j</sup>  | 3.593     |
| C(22) | C(13)               | 3.242(8)  | C(22) | C(14)                | 2.545(8)  |
| C(22) | C(16)               | 3.448(8)  | C(22) | H(4) <sup>2j</sup>   | 3.530     |
| C(22) | H(8) <sup>3j</sup>  | 3.041     | C(22) | H(9)                 | 2.092     |

Table 6. Distances beyond the asymmetric unit out to 3.60 Å (continued)

| atom  | atom                 | distance  | atom  | atom                 | distance  |
|-------|----------------------|-----------|-------|----------------------|-----------|
| C(22) | H(10)                | 2.090     | C(22) | H(12)                | 2.811     |
| C(22) | H(12) <sup>11)</sup> | 3.214     | C(22) | H(17) <sup>11)</sup> | 3.571     |
| C(22) | H(19) <sup>11)</sup> | 3.470     | C(23) | O(2) <sup>6)</sup>   | 3.430(8)  |
| C(23) | N(5)                 | 3.194(9)  | C(23) | C(9)                 | 3.488(8)  |
| C(23) | C(11)                | 3.418(8)  | C(23) | C(12)                | 2.540(9)  |
| C(23) | C(19)                | 2.514(11) | C(23) | C(20)                | 2.884(11) |
| C(23) | C(24)                | 2.487(11) | C(23) | H(3)                 | 2.916     |
| C(23) | H(4)                 | 3.360     | C(23) | H(7)                 | 3.336     |
| C(23) | H(8)                 | 2.060     | C(23) | H(13) <sup>3)</sup>  | 2.970     |
| C(23) | H(18) <sup>7)</sup>  | 3.008     | C(24) | C(15)                | 2.786(9)  |
| C(24) | C(19)                | 2.420(11) | C(24) | C(23)                | 2.487(11) |
| C(24) | H(4)                 | 3.285     | C(24) | H(4) <sup>10)</sup>  | 3.301     |
| C(24) | H(5)                 | 2.036     | C(24) | H(6)                 | 3.358     |
| C(24) | H(8)                 | 2.078     | C(24) | H(8) <sup>12)</sup>  | 3.458     |
| C(24) | H(9) <sup>7)</sup>   | 3.277     | C(24) | H(12) <sup>13)</sup> | 3.592     |
| C(24) | H(18) <sup>7)</sup>  | 3.306     | C(24) | H(19) <sup>6)</sup>  | 3.484     |
| C(25) | C(15)                | 2.417(10) | C(25) | C(19)                | 2.835(11) |
| C(25) | C(20)                | 2.463(13) | C(25) | H(5)                 | 3.320     |
| C(25) | H(6)                 | 2.087     | C(25) | H(7)                 | 2.083     |
| C(25) | H(8) <sup>12)</sup>  | 3.480     | C(25) | H(18) <sup>7)</sup>  | 3.144     |
| C(25) | H(19) <sup>6)</sup>  | 3.243     | H(1)  | S(1)                 | 3.071     |
| H(1)  | S(1) <sup>1)</sup>   | 3.040     | H(1)  | O(2)                 | 2.555     |
| H(1)  | O(2) <sup>1)</sup>   | 3.016     | H(1)  | O(3) <sup>1)</sup>   | 2.172     |
| H(1)  | C(1)                 | 3.192     | H(1)  | C(10)                | 2.878     |
| H(1)  | C(13)                | 3.180     | H(1)  | C(14)                | 2.096     |
| H(1)  | C(17)                | 2.072     | H(1)  | C(18)                | 2.738     |
| H(1)  | H(6) <sup>3)</sup>   | 3.097     | H(1)  | H(8) <sup>3)</sup>   | 3.024     |
| H(1)  | H(9)                 | 2.419     | H(1)  | H(10)                | 3.327     |
| H(2)  | O(2) <sup>8)</sup>   | 2.755     | H(2)  | N(1) <sup>6)</sup>   | 3.393     |
| H(2)  | N(4) <sup>2)</sup>   | 3.571     | H(2)  | N(5) <sup>6)</sup>   | 3.473     |
| H(2)  | C(1)                 | 2.022     | H(2)  | C(9)                 | 2.016     |
| H(2)  | C(11)                | 3.279     | H(2)  | C(13)                | 2.841     |
| H(2)  | C(16)                | 3.038     | H(2)  | C(17)                | 3.295     |
| H(2)  | C(21) <sup>8)</sup>  | 3.460     | H(2)  | H(3)                 | 2.312     |
| H(2)  | H(6) <sup>6)</sup>   | 3.296     | H(2)  | H(11)                | 3.302     |
| H(2)  | H(13)                | 2.546     | H(2)  | H(15) <sup>6)</sup>  | 3.383     |
| H(2)  | H(16) <sup>8)</sup>  | 2.512     | H(3)  | C(1)                 | 3.211     |

Table 6. Distances beyond the asymmetric unit out to 3.60 Å (continued)

| atom | atom                 | distance | atom | atom                 | distance |
|------|----------------------|----------|------|----------------------|----------|
| H(3) | C(8)                 | 2.000    | H(3) | C(10)                | 3.263    |
| H(3) | C(11)                | 2.044    | H(3) | C(12)                | 2.688    |
| H(3) | C(15)                | 2.602    | H(3) | C(19)                | 3.288    |
| H(3) | C(21) <sup>8)</sup>  | 2.960    | H(3) | C(23)                | 2.916    |
| H(3) | H(2)                 | 2.312    | H(3) | H(6)                 | 3.064    |
| H(3) | H(10) <sup>2)</sup>  | 2.814    | H(3) | H(14) <sup>8)</sup>  | 2.970    |
| H(3) | H(15) <sup>8)</sup>  | 3.201    | H(3) | H(16) <sup>8)</sup>  | 2.294    |
| H(4) | N(5)                 | 3.278    | H(4) | C(11)                | 3.410    |
| H(4) | C(12)                | 2.656    | H(4) | C(15)                | 2.065    |
| H(4) | C(20)                | 2.066    | H(4) | C(20) <sup>5)</sup>  | 3.348    |
| H(4) | C(22) <sup>2)</sup>  | 3.530    | H(4) | C(23)                | 3.360    |
| H(4) | C(24)                | 3.285    | H(4) | C(24) <sup>5)</sup>  | 3.301    |
| H(4) | H(5)                 | 2.374    | H(4) | H(5) <sup>5)</sup>   | 3.001    |
| H(4) | H(7) <sup>5)</sup>   | 2.914    | H(4) | H(10) <sup>2)</sup>  | 2.902    |
| H(4) | H(11) <sup>2)</sup>  | 3.318    | H(4) | H(12) <sup>2)</sup>  | 3.233    |
| H(4) | H(14) <sup>10)</sup> | 3.557    | H(4) | H(17) <sup>2)</sup>  | 2.791    |
| H(5) | O(3) <sup>10)</sup>  | 3.251    | H(5) | N(1) <sup>10)</sup>  | 3.237    |
| H(5) | N(5) <sup>10)</sup>  | 2.645    | H(5) | C(12) <sup>10)</sup> | 3.274    |
| H(5) | C(15)                | 3.293    | H(5) | C(19)                | 2.050    |
| H(5) | C(19) <sup>10)</sup> | 3.468    | H(5) | C(21) <sup>10)</sup> | 3.408    |
| H(5) | C(24)                | 2.036    | H(5) | C(25)                | 3.320    |
| H(5) | H(4)                 | 2.374    | H(5) | H(4) <sup>10)</sup>  | 3.001    |
| H(5) | H(7)                 | 2.329    | H(5) | H(9) <sup>7)</sup>   | 3.100    |
| H(5) | H(10) <sup>2)</sup>  | 3.573    | H(5) | H(14) <sup>10)</sup> | 2.734    |
| H(5) | H(17) <sup>2)</sup>  | 3.354    | H(5) | H(18) <sup>2)</sup>  | 3.593    |
| H(6) | O(2) <sup>6)</sup>   | 2.549    | H(6) | N(5)                 | 3.242    |
| H(6) | C(9)                 | 3.521    | H(6) | C(11)                | 3.442    |
| H(6) | C(12)                | 2.710    | H(6) | C(15)                | 2.095    |
| H(6) | C(16) <sup>3)</sup>  | 3.320    | H(6) | C(19)                | 3.368    |
| H(6) | C(24)                | 3.358    | H(6) | C(25)                | 2.087    |
| H(6) | H(1) <sup>6)</sup>   | 3.097    | H(6) | H(2) <sup>3)</sup>   | 3.296    |
| H(6) | H(3)                 | 3.064    | H(6) | H(8)                 | 2.401    |
| H(6) | H(11) <sup>3)</sup>  | 3.579    | H(6) | H(13) <sup>3)</sup>  | 2.423    |
| H(6) | H(18) <sup>7)</sup>  | 3.489    | H(7) | O(3) <sup>10)</sup>  | 3.254    |
| H(7) | C(16) <sup>13)</sup> | 3.179    | H(7) | C(19)                | 3.275    |
| H(7) | C(20)                | 2.031    | H(7) | C(23)                | 3.336    |
| H(7) | C(25)                | 2.083    | H(7) | H(4) <sup>10)</sup>  | 2.914    |



Table 6. Distances beyond the asymmetric unit out to 3.60 Å (continued)

| atom  | atom                 | distance | atom  | atom                 | distance |
|-------|----------------------|----------|-------|----------------------|----------|
| H(7)  | H(5)                 | 2.329    | H(7)  | H(8)                 | 2.375    |
| H(7)  | H(8) <sup>12)</sup>  | 3.287    | H(7)  | H(9) <sup>7)</sup>   | 3.421    |
| H(7)  | H(11) <sup>13)</sup> | 3.011    | H(7)  | H(12) <sup>13)</sup> | 2.663    |
| H(7)  | H(13) <sup>13)</sup> | 3.385    | H(7)  | H(19) <sup>6)</sup>  | 3.038    |
| H(8)  | N(4) <sup>6)</sup>   | 3.212    | H(8)  | C(14) <sup>6)</sup>  | 3.285    |
| H(8)  | C(15)                | 3.287    | H(8)  | C(18) <sup>6)</sup>  | 3.156    |
| H(8)  | C(20)                | 3.307    | H(8)  | C(22) <sup>6)</sup>  | 3.041    |
| H(8)  | C(23)                | 2.060    | H(8)  | C(24)                | 2.078    |
| H(8)  | C(24) <sup>12)</sup> | 3.458    | H(8)  | C(25) <sup>12)</sup> | 3.480    |
| H(8)  | H(1) <sup>6)</sup>   | 3.024    | H(8)  | H(6)                 | 2.401    |
| H(8)  | H(7)                 | 2.375    | H(8)  | H(7) <sup>12)</sup>  | 3.287    |
| H(8)  | H(8) <sup>12)</sup>  | 3.332    | H(8)  | H(9) <sup>6)</sup>   | 2.817    |
| H(8)  | H(18) <sup>6)</sup>  | 3.067    | H(8)  | H(19) <sup>6)</sup>  | 2.549    |
| H(9)  | O(3) <sup>1)</sup>   | 2.686    | H(9)  | N(4)                 | 2.528    |
| H(9)  | C(13)                | 3.364    | H(9)  | C(14)                | 2.040    |
| H(9)  | C(20) <sup>14)</sup> | 3.074    | H(9)  | C(22)                | 2.092    |
| H(9)  | C(24) <sup>14)</sup> | 3.277    | H(9)  | H(1)                 | 2.419    |
| H(9)  | H(5) <sup>14)</sup>  | 3.100    | H(9)  | H(7) <sup>14)</sup>  | 3.421    |
| H(9)  | H(8) <sup>3)</sup>   | 2.817    | H(9)  | H(10)                | 1.551    |
| H(9)  | H(14) <sup>1)</sup>  | 3.065    | H(9)  | H(16) <sup>1)</sup>  | 3.555    |
| H(9)  | H(17)                | 2.806    | H(9)  | H(18)                | 2.264    |
| H(9)  | H(19)                | 2.538    | H(10) | N(4)                 | 3.064    |
| H(10) | C(9) <sup>2)</sup>   | 3.175    | H(10) | C(13)                | 2.926    |
| H(10) | C(14)                | 2.029    | H(10) | C(15) <sup>2)</sup>  | 3.596    |
| H(10) | C(16)                | 3.392    | H(10) | C(19) <sup>2)</sup>  | 3.015    |
| H(10) | C(20) <sup>2)</sup>  | 3.420    | H(10) | C(21) <sup>1)</sup>  | 3.593    |
| H(10) | C(22)                | 2.090    | H(10) | H(1)                 | 3.327    |
| H(10) | H(3) <sup>2)</sup>   | 2.814    | H(10) | H(4) <sup>2)</sup>   | 2.902    |
| H(10) | H(5) <sup>2)</sup>   | 3.573    | H(10) | H(9)                 | 1.551    |
| H(10) | H(11)                | 3.433    | H(10) | H(12)                | 3.172    |
| H(10) | H(14) <sup>1)</sup>  | 2.983    | H(10) | H(16) <sup>1)</sup>  | 3.328    |
| H(10) | H(17)                | 2.255    | H(10) | H(18)                | 2.550    |
| H(10) | H(19)                | 2.797    | H(11) | S(1) <sup>2)</sup>   | 3.260    |
| H(11) | O(3) <sup>2)</sup>   | 2.611    | H(11) | C(1)                 | 3.066    |
| H(11) | C(8)                 | 3.595    | H(11) | C(9) <sup>2)</sup>   | 3.483    |
| H(11) | C(10) <sup>2)</sup>  | 2.810    | H(11) | C(11) <sup>2)</sup>  | 2.906    |
| H(11) | C(12) <sup>2)</sup>  | 3.450    | H(11) | C(13)                | 2.064    |

Table 6. Distances beyond the asymmetric unit out to 3.60 Å (continued)

| atom  | atom                 | distance | atom  | atom                 | distance |
|-------|----------------------|----------|-------|----------------------|----------|
| H(11) | C(14)                | 3.054    | H(11) | C(17) <sup>2j</sup>  | 3.321    |
| H(11) | H(2)                 | 3.302    | H(11) | H(4) <sup>2j</sup>   | 3.318    |
| H(11) | H(6) <sup>6j</sup>   | 3.579    | H(11) | H(7) <sup>9j</sup>   | 3.011    |
| H(11) | H(10)                | 3.433    | H(11) | H(12)                | 1.551    |
| H(11) | H(13)                | 1.551    | H(11) | H(17)                | 3.479    |
| H(12) | C(1)                 | 3.360    | H(12) | C(13)                | 2.072    |
| H(12) | C(14)                | 2.791    | H(12) | C(18)                | 3.108    |
| H(12) | C(22)                | 2.811    | H(12) | C(22) <sup>11j</sup> | 3.214    |
| H(12) | C(24) <sup>9j</sup>  | 3.592    | H(12) | H(4) <sup>2j</sup>   | 3.233    |
| H(12) | H(7) <sup>9j</sup>   | 2.663    | H(12) | H(10)                | 3.172    |
| H(12) | H(11)                | 1.551    | H(12) | H(13)                | 1.551    |
| H(12) | H(17)                | 2.313    | H(12) | H(17) <sup>11j</sup> | 3.281    |
| H(12) | H(18) <sup>11j</sup> | 3.063    | H(12) | H(19)                | 2.771    |
| H(12) | H(19) <sup>11j</sup> | 2.780    | H(13) | O(2) <sup>8j</sup>   | 3.493    |
| H(13) | O(3) <sup>2j</sup>   | 3.352    | H(13) | N(5) <sup>6j</sup>   | 3.426    |
| H(13) | C(1)                 | 2.753    | H(13) | C(8)                 | 2.986    |
| H(13) | C(13)                | 2.072    | H(13) | C(14)                | 3.340    |
| H(13) | C(23) <sup>6j</sup>  | 2.970    | H(13) | H(2)                 | 2.546    |
| H(13) | H(6) <sup>6j</sup>   | 2.423    | H(13) | H(7) <sup>9j</sup>   | 3.385    |
| H(13) | H(11)                | 1.551    | H(13) | H(12)                | 1.551    |
| H(13) | H(18) <sup>11j</sup> | 3.255    | H(14) | S(1)                 | 3.094    |
| H(14) | O(3)                 | 3.282    | H(14) | N(1)                 | 2.006    |
| H(14) | N(5)                 | 2.553    | H(14) | C(18) <sup>1j</sup>  | 3.466    |
| H(14) | C(20) <sup>5j</sup>  | 3.415    | H(14) | H(3) <sup>4j</sup>   | 2.970    |
| H(14) | H(4) <sup>5j</sup>   | 3.557    | H(14) | H(5) <sup>5j</sup>   | 2.734    |
| H(14) | H(9) <sup>1j</sup>   | 3.065    | H(14) | H(10) <sup>1j</sup>  | 2.983    |
| H(14) | H(15)                | 1.551    | H(14) | H(16)                | 1.551    |
| H(15) | S(1)                 | 3.457    | H(15) | N(1)                 | 2.007    |
| H(15) | N(4) <sup>3j</sup>   | 3.418    | H(15) | N(5)                 | 2.689    |
| H(15) | C(1) <sup>3j</sup>   | 2.634    | H(15) | C(8) <sup>3j</sup>   | 2.916    |
| H(15) | C(9) <sup>3j</sup>   | 3.291    | H(15) | C(10) <sup>3j</sup>  | 3.217    |
| H(15) | C(11) <sup>3j</sup>  | 3.438    | H(15) | C(13) <sup>3j</sup>  | 3.171    |
| H(15) | C(14) <sup>3j</sup>  | 3.597    | H(15) | C(17) <sup>3j</sup>  | 2.815    |
| H(15) | H(2) <sup>3j</sup>   | 3.383    | H(15) | H(3) <sup>4j</sup>   | 3.201    |
| H(15) | H(14)                | 1.551    | H(15) | H(16)                | 1.551    |
| H(16) | S(1)                 | 2.688    | H(16) | O(2)                 | 2.561    |
| H(16) | O(3)                 | 3.303    | H(16) | N(1)                 | 2.009    |

Table 6. Distances beyond the asymmetric unit out to 3.60 Å (continued)

| atom  | atom                 | distance | atom  | atom                 | distance |
|-------|----------------------|----------|-------|----------------------|----------|
| H(16) | N(5)                 | 3.208    | H(16) | C(8) <sup>4j</sup>   | 3.048    |
| H(16) | C(9) <sup>4j</sup>   | 2.956    | H(16) | H(2) <sup>4j</sup>   | 2.512    |
| H(16) | H(3) <sup>4j</sup>   | 2.294    | H(16) | H(9) <sup>1j</sup>   | 3.555    |
| H(16) | H(10) <sup>1j</sup>  | 3.328    | H(16) | H(14)                | 1.551    |
| H(16) | H(15)                | 1.551    | H(17) | C(13)                | 3.318    |
| H(17) | C(14)                | 2.946    | H(17) | C(16)                | 3.094    |
| H(17) | C(18)                | 2.099    | H(17) | C(19) <sup>2j</sup>  | 3.396    |
| H(17) | C(22) <sup>11j</sup> | 3.571    | H(17) | H(4) <sup>2j</sup>   | 2.791    |
| H(17) | H(5) <sup>2j</sup>   | 3.354    | H(17) | H(9)                 | 2.806    |
| H(17) | H(10)                | 2.255    | H(17) | H(11)                | 3.479    |
| H(17) | H(12)                | 2.313    | H(17) | H(12) <sup>11j</sup> | 3.281    |
| H(17) | H(17) <sup>11j</sup> | 3.397    | H(17) | H(18)                | 1.551    |
| H(17) | H(19)                | 1.551    | H(17) | H(19) <sup>11j</sup> | 2.903    |
| H(18) | N(5) <sup>14j</sup>  | 3.456    | H(18) | C(14)                | 3.310    |
| H(18) | C(15) <sup>14j</sup> | 2.963    | H(18) | C(18)                | 2.107    |
| H(18) | C(19) <sup>14j</sup> | 3.131    | H(18) | C(20) <sup>14j</sup> | 3.286    |
| H(18) | C(23) <sup>14j</sup> | 3.008    | H(18) | C(24) <sup>14j</sup> | 3.306    |
| H(18) | C(25) <sup>14j</sup> | 3.144    | H(18) | H(5) <sup>2j</sup>   | 3.593    |
| H(18) | H(6) <sup>14j</sup>  | 3.489    | H(18) | H(8) <sup>3j</sup>   | 3.067    |
| H(18) | H(9)                 | 2.264    | H(18) | H(10)                | 2.550    |
| H(18) | H(12) <sup>11j</sup> | 3.063    | H(18) | H(13) <sup>11j</sup> | 3.255    |
| H(18) | H(17)                | 1.551    | H(18) | H(19)                | 1.551    |
| H(19) | N(4)                 | 3.517    | H(19) | C(13)                | 3.084    |
| H(19) | C(14)                | 2.544    | H(19) | C(16)                | 3.372    |
| H(19) | C(18)                | 2.088    | H(19) | C(22) <sup>11j</sup> | 3.470    |
| H(19) | C(24) <sup>3j</sup>  | 3.484    | H(19) | C(25) <sup>3j</sup>  | 3.243    |
| H(19) | H(7) <sup>3j</sup>   | 3.038    | H(19) | H(8) <sup>3j</sup>   | 2.549    |
| H(19) | H(9)                 | 2.538    | H(19) | H(10)                | 2.797    |
| H(19) | H(12)                | 2.771    | H(19) | H(12) <sup>11j</sup> | 2.780    |
| H(19) | H(17)                | 1.551    | H(19) | H(17) <sup>11j</sup> | 2.903    |
| H(19) | H(18)                | 1.551    | H(19) | H(19) <sup>11j</sup> | 3.182    |

Symmetry Operators:

- |                          |                            |
|--------------------------|----------------------------|
| (1) -X,-Y+1,-Z+1         | (2) -X,-Y,-Z+1             |
| (3) -X,Y+1/2,-Z+1/2+1    | (4) X,Y+1,Z                |
| (5) -X+1,Y+1/2,-Z+1/2+1  | (6) -X,Y+1/2-1,-Z+1/2+1    |
| (7) X+1,-Y+1/2,Z+1/2     | (8) X,Y-1,Z                |
| (9) X-1,-Y+1/2-1,Z+1/2-1 | (10) -X+1,Y+1/2-1,-Z+1/2+1 |
| (11) -X-1,-Y,-Z+1        | (12) -X+1,-Y,-Z+2          |
| (13) X+1,-Y+1/2-1,Z+1/2  | (14) X-1,-Y+1/2,Z+1/2-1    |

Table 7. Intramolecular and Intermolecular Hydrogen bonds

| D    | H    | A             | D...A    | D-H   | H...A | D-H...A |
|------|------|---------------|----------|-------|-------|---------|
| N(4) | H(1) | O(2)          | 3.088(5) | 0.950 | 2.555 | 115.7   |
| N(4) | H(1) | O(3)[3:0:1:1] | 3.038(6) | 0.950 | 2.172 | 150.9   |

Note) 1. The symmetry operations are applied to the acceptors.  
2. Estimated standard deviations (esd's) are shown in the parentheses.  
They are not calculated when all atoms have an esd=0.0.
