# Supplementary material for: Thiadiazino-indole, thiadiazino-carbazole and benzothiadiazino-carbazole dioxides: synthesis, physicochemical and early ADME characterization of representatives of new tri-, tetra- and pentacyclic ring systems and their intermediates
Source: publisher site journal article supplement (doi:10.3762/bjoc.21.169), 2025-10-21
Supplement: Additional file 2 [file 3h_xrd.pdf › Átnevezett XRD/3h_xrd.pdf]

**143660**

**PGY0765\_1A**

Submitted by: Pusztai Gyongyver  
Operator: Dancso Andras

X-ray Structure Report

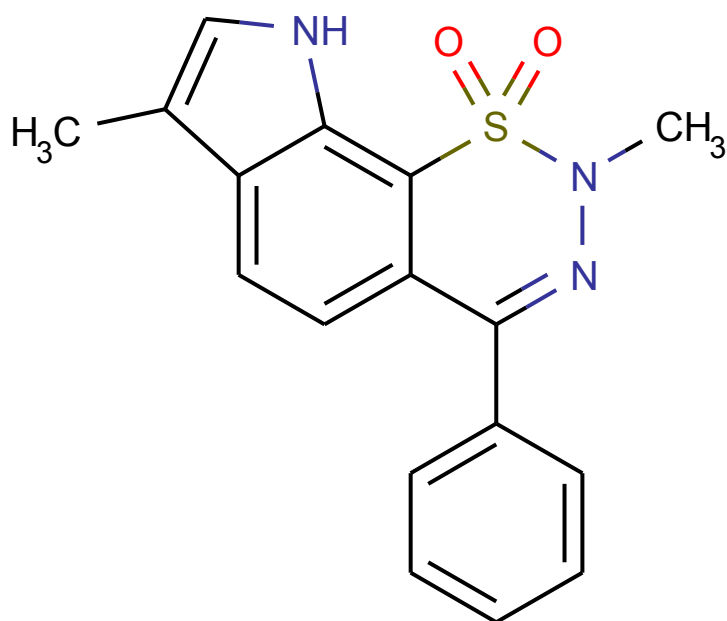

November 11, 2024

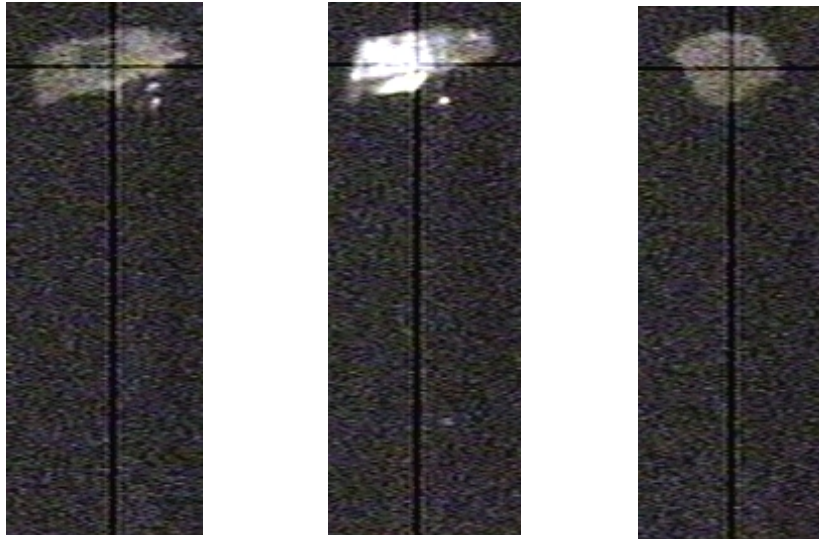

Fig. 1. The crystal

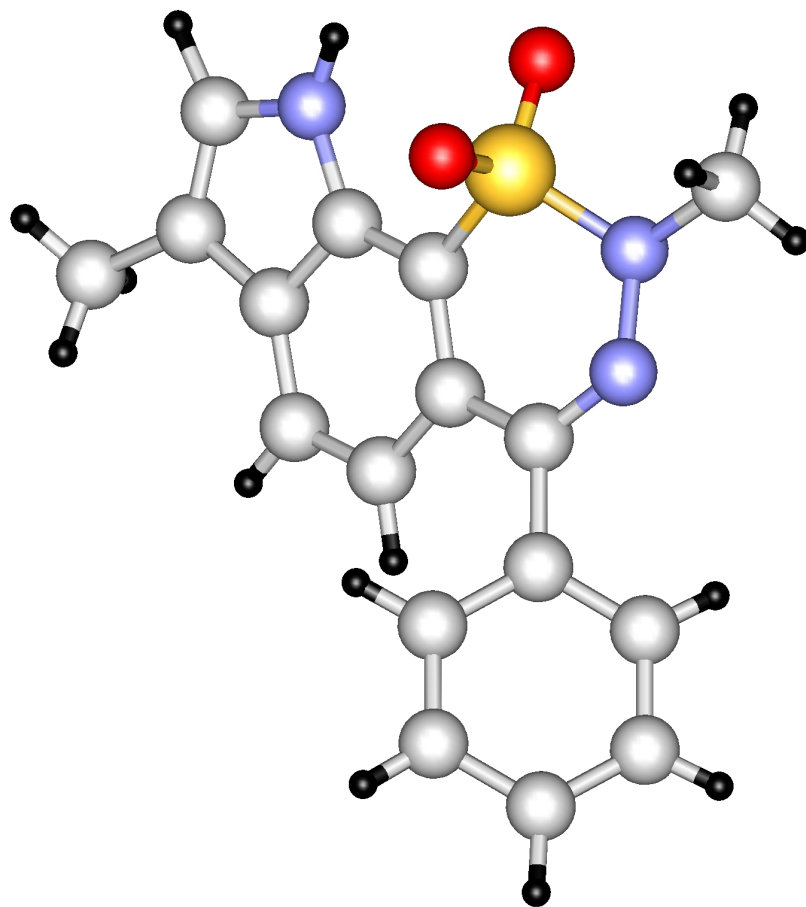

Fig. 2. The molecule (some hydrogens were generated by the software)

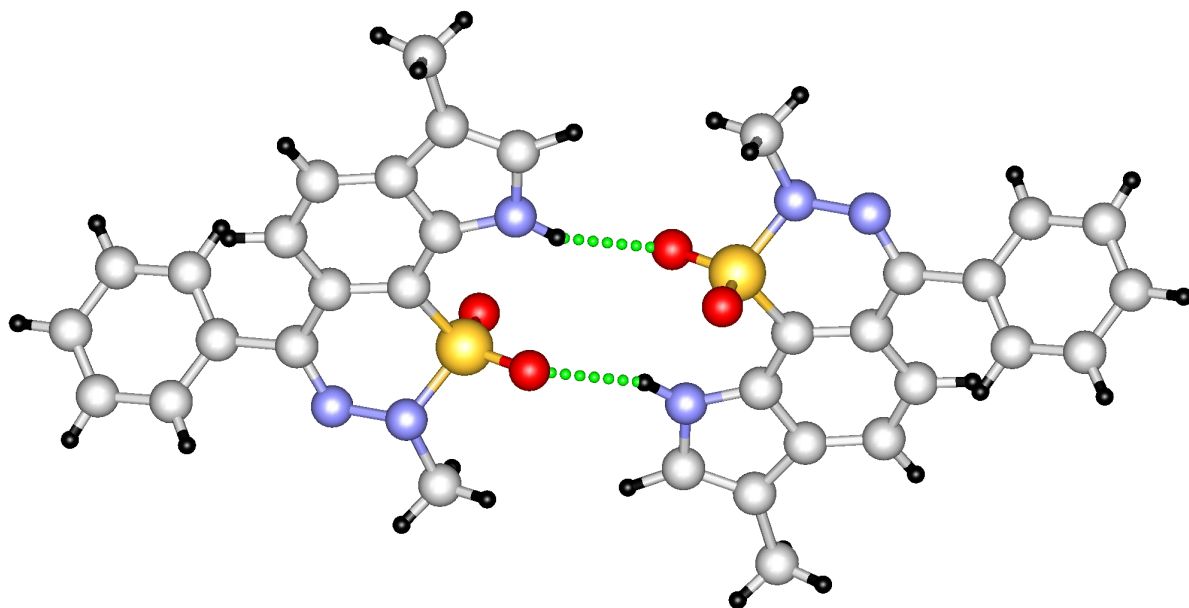

Fig. 3. Hydrogen bonds

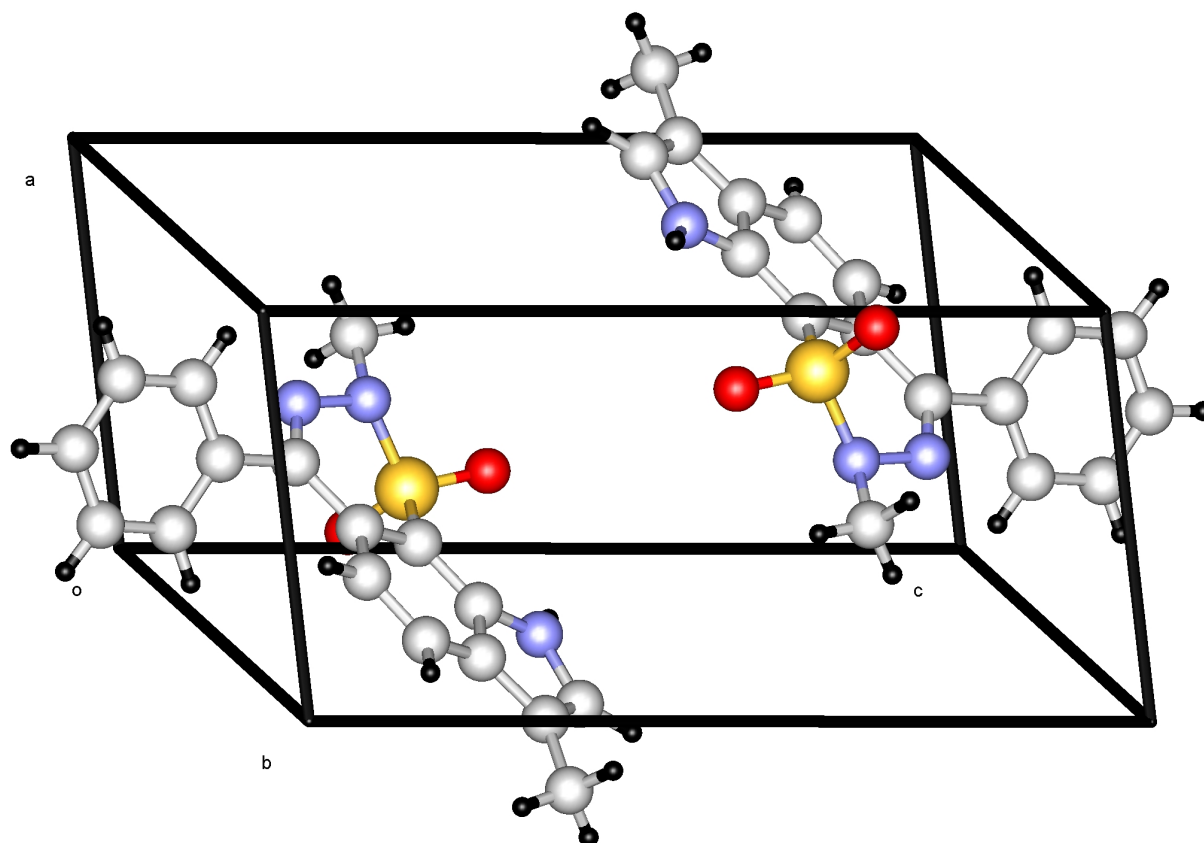

Fig. 4. Packing

## *Experimental*

### Data Collection

A colorless prism crystal of  $C_{17}H_{15}N_3O_2S$  having approximate dimensions of 0.22 x 0.13 x 0.08 mm was mounted on a cactus needle. All measurements were made on a Rigaku RAXIS RAPID imaging plate area detector with graphite monochromated Cu-K $\alpha$  radiation.

Indexing was performed from 4 oscillations that were exposed for 600 seconds. The crystal-to-detector distance was 127.40 mm.

Cell constants and an orientation matrix for data collection corresponded to a primitive triclinic cell with dimensions:

$$\begin{aligned}a &= 6.5525(5) \text{ \AA} & \alpha &= 94.599(4)^\circ \\b &= 8.5010(6) \text{ \AA} & \beta &= 98.210(4)^\circ \\c &= 14.9131(10) \text{ \AA} & \gamma &= 105.947(4)^\circ \\V &= 784.30(10) \text{ \AA}^3\end{aligned}$$

For  $Z = 2$  and F.W. = 325.38, the calculated density is 1.378 g/cm<sup>3</sup>. Based on a statistical analysis of intensity distribution, and the successful solution and refinement of the structure, the space group was determined to be:

### P-1 (#2)

The data were collected at a temperature of  $20 \pm 1^\circ\text{C}$  to a maximum  $2\theta$  value of  $143.2^\circ$ . A total of 180 oscillation images were collected. A sweep of data was done using  $\omega$  scans from  $20.0$  to  $200.0^\circ$  in  $5.0^\circ$  step, at  $\chi=0.0^\circ$  and  $\phi = 0.0^\circ$ . The exposure rate was 120.0 [sec./ $^\circ$ ]. A second sweep was performed using  $\omega$  scans from  $20.0$  to  $200.0^\circ$  in  $5.0^\circ$  step, at  $\chi=54.0^\circ$  and  $\phi = 0.0^\circ$ . The exposure rate was 120.0 [sec./ $^\circ$ ]. Another sweep was performed using  $\omega$  scans from  $20.0$  to  $200.0^\circ$  in  $5.0^\circ$  step, at  $\chi=54.0^\circ$  and  $\phi = 90.0^\circ$ . The exposure rate was 120.0 [sec./ $^\circ$ ]. Another sweep was performed using  $\omega$  scans from  $20.0$  to  $200.0^\circ$  in  $5.0^\circ$  step, at  $\chi=54.0^\circ$  and  $\phi = 180.0^\circ$ . The exposure rate was 120.0 [sec./ $^\circ$ ]. Another sweep was performed using  $\omega$  scans from  $20.0$  to  $200.0^\circ$  in  $5.0^\circ$  step, at  $\chi=54.0^\circ$  and  $\phi = 270.0^\circ$ . The exposure rate was 120.0 [sec./ $^\circ$ ]. The crystal-to-detector distance was 127.40 mm. Readout was performed in the 0.100 mm pixel mode.

## Data Reduction

Of the 8983 reflections that were collected, 2727 were unique ( $R_{\text{int}} = 0.042$ ).

The linear absorption coefficient,  $\mu$ , for Cu-K $\alpha$  radiation is 19.471 cm<sup>-1</sup>. An empirical absorption correction was applied which resulted in transmission factors ranging from 0.711 to 0.857. The data were corrected for Lorentz and polarization effects.

## Structure Solution and Refinement

The structure was solved by direct methods<sup>1</sup> and expanded using Fourier techniques<sup>2</sup>. The non-hydrogen atoms were refined anisotropically. Some hydrogen atoms were refined isotropically and the rest were refined using the riding model. The final cycle of full-matrix least-squares refinement<sup>3</sup> on F was based on 6331 observed reflections ( $I > 2.00\sigma(I)$ ) and 259 variable parameters and converged (largest parameter shift was 0.00 times its esd) with unweighted and weighted agreement factors of:

$$R = \Sigma ||F_o| - |F_c|| / \Sigma |F_o| = 0.0589$$

$$R_w = [ \Sigma w (|F_o| - |F_c|)^2 / \Sigma w F_o^2 ]^{1/2} = 0.0558$$

The standard deviation of an observation of unit weight<sup>4</sup> was 3.31. Unit weights were used. Plots of  $\Sigma w (|F_o| - |F_c|)^2$  versus  $|F_o|$ , reflection order in data collection,  $\sin \theta/\lambda$  and various classes of indices showed no unusual trends. The maximum and minimum peaks on the final difference Fourier map corresponded to 2.57 and -1.88 e<sup>-</sup>/Å<sup>3</sup>, respectively.

Neutral atom scattering factors were taken from Cromer and Waber<sup>5</sup>. Anomalous dispersion effects were included in  $F_{\text{calc}}$ <sup>6</sup>; the values for  $\Delta f'$  and  $\Delta f''$  were those of Creagh and McAuley<sup>7</sup>. The values for the mass attenuation coefficients are those of Creagh and Hubbell<sup>8</sup>. All calculations were performed using the CrystalStructure<sup>9,10</sup> crystallographic software package.

## *References*

- (1) SIR92: Altomare, A., Cascarano, G., Giacovazzo, C., Guagliardi, A., Burla, M., Polidori, G., and Camalli, M. (1994) J. Appl. Cryst., 27, 435.
- (2) DIRDIF99: Beurskens, P.T., Admiraal, G., Beurskens, G., Bosman, W.P., de Gelder, R., Israel, R. and Smits, J.M.M. (1999). The DIRDIF-99 program system, Technical Report of the Crystallography Laboratory, University of Nijmegen, The Netherlands.

(3) Least Squares function minimized:

$$\sum w(|F_o| - |F_c|)^2 \quad \text{where } w = \text{Least Squares weights.}$$

(4) Standard deviation of an observation of unit weight:

$$[\sum w(|F_o| - |F_c|)^2 / (N_o - N_v)]^{1/2}$$

where:  $N_o$  = number of observations

$N_v$  = number of variables

(5) Cromer, D. T. & Waber, J. T.; "International Tables for X-ray Crystallography", Vol. IV, The Kynoch Press, Birmingham, England, Table 2.2 A (1974).

(6) Ibers, J. A. & Hamilton, W. C.; Acta Crystallogr., 17, 781 (1964).

(7) Creagh, D. C. & McAuley, W.J. ; "International Tables for Crystallography", Vol C, (A.J.C. Wilson, ed.), Kluwer Academic Publishers, Boston, Table 4.2.6.8, pages 219-222 (1992).

(8) Creagh, D. C. & Hubbell, J.H.; "International Tables for Crystallography", Vol C, (A.J.C. Wilson, ed.), Kluwer Academic Publishers, Boston, Table 4.2.4.3, pages 200-206 (1992).

(9) CrystalStructure 3.7.0: Crystal Structure Analysis Package, Rigaku and Rigaku/MSK (2000-2005). 9009 New Trails Dr. The Woodlands TX 77381 USA.

(10) CRYSTALS Issue 10: Watkin, D.J., Prout, C.K. Carruthers, J.R. & Betteridge, P.W. Chemical Crystallography Laboratory, Oxford, UK. (1996)



## EXPERIMENTAL DETAILS

### A. Crystal Data

|                         |                                                                                                                                                                                                                         |
|-------------------------|-------------------------------------------------------------------------------------------------------------------------------------------------------------------------------------------------------------------------|
| Empirical Formula       | $\text{C}_{17}\text{H}_{15}\text{N}_3\text{O}_2\text{S}$                                                                                                                                                                |
| Formula Weight          | 325.38                                                                                                                                                                                                                  |
| Crystal Color, Habit    | colorless, prism                                                                                                                                                                                                        |
| Crystal Dimensions      | 0.22 X 0.13 X 0.08 mm                                                                                                                                                                                                   |
| Crystal System          | triclinic                                                                                                                                                                                                               |
| Lattice Type            | Primitive                                                                                                                                                                                                               |
| Indexing Images         | 4 oscillations @ 600.0 seconds                                                                                                                                                                                          |
| Detector Position       | 127.40 mm                                                                                                                                                                                                               |
| Pixel Size              | 0.100 mm                                                                                                                                                                                                                |
| Lattice Parameters      | $a = 6.5525(5) \text{ \AA}$<br>$b = 8.5010(6) \text{ \AA}$<br>$c = 14.9131(10) \text{ \AA}$<br>$\alpha = 94.599(4)^\circ$<br>$\beta = 98.210(4)^\circ$<br>$\gamma = 105.947(4)^\circ$<br>$V = 784.30(10) \text{ \AA}^3$ |
| Space Group             | P-1 (#2)                                                                                                                                                                                                                |
| Z value                 | 2                                                                                                                                                                                                                       |
| $D_{\text{calc}}$       | $1.378 \text{ g/cm}^3$                                                                                                                                                                                                  |
| $F_{000}$               | 340.00                                                                                                                                                                                                                  |
| $\mu(\text{CuK}\alpha)$ | $19.471 \text{ cm}^{-1}$                                                                                                                                                                                                |

## B. Intensity Measurements

|                                                           |                                                                       |
|-----------------------------------------------------------|-----------------------------------------------------------------------|
| Diffractometer                                            | Rigaku RAXIS-RAPID                                                    |
| Radiation                                                 | CuK $\alpha$ ( $\lambda$ = 1.54187 Å)<br>graphite monochromated       |
| Detector Aperture                                         | 280 mm x 256 mm                                                       |
| Data Images                                               | 180 exposures                                                         |
| $\omega$ oscillation Range ( $\chi$ =0.0, $\phi$ =0.0)    | 20.0 - 200.0 $^{\circ}$                                               |
| Exposure Rate                                             | 120.0 sec./ $^{\circ}$                                                |
| $\omega$ oscillation Range ( $\chi$ =54.0, $\phi$ =0.0)   | 20.0 - 200.0 $^{\circ}$                                               |
| Exposure Rate                                             | 120.0 sec./ $^{\circ}$                                                |
| $\omega$ oscillation Range ( $\chi$ =54.0, $\phi$ =90.0)  | 20.0 - 200.0 $^{\circ}$                                               |
| Exposure Rate                                             | 120.0 sec./ $^{\circ}$                                                |
| $\omega$ oscillation Range ( $\chi$ =54.0, $\phi$ =180.0) | 20.0 - 200.0 $^{\circ}$                                               |
| Exposure Rate                                             | 120.0 sec./ $^{\circ}$                                                |
| $\omega$ oscillation Range ( $\chi$ =54.0, $\phi$ =270.0) | 20.0 - 200.0 $^{\circ}$                                               |
| Exposure Rate                                             | 120.0 sec./ $^{\circ}$                                                |
| Detector Position                                         | 127.40 mm                                                             |
| Pixel Size                                                | 0.100 mm                                                              |
| $2\theta_{\max}$                                          | 143.2 $^{\circ}$                                                      |
| No. of Reflections Measured                               | Total: 8983<br>Unique: 2727 ( $R_{\text{int}}$ = 0.042)               |
| Corrections                                               | Lorentz-polarization<br>Absorption<br>(trans. factors: 0.711 - 0.857) |

### C. Structure Solution and Refinement

|                                          |                                |
|------------------------------------------|--------------------------------|
| Structure Solution                       | Direct Methods (SIR92)         |
| Refinement                               | Full-matrix least-squares on F |
| Function Minimized                       | $\Sigma w ( Fo  -  Fc )^2$     |
| Least Squares Weights                    | 1                              |
| $2\theta_{\text{max}}$ cutoff            | 143.2 $^{\circ}$               |
| Anomalous Dispersion                     | All non-hydrogen atoms         |
| No. Observations ( $I > 2.00\sigma(I)$ ) | 6331                           |
| No. Variables                            | 259                            |
| Reflection/Parameter Ratio               | 24.44                          |
| Residuals: R ( $I > 2.00\sigma(I)$ )     | 0.0589                         |
| Residuals: Rw ( $I > 2.00\sigma(I)$ )    | 0.0558                         |
| Goodness of Fit Indicator                | 3.311                          |
| Max Shift/Error in Final Cycle           | 0.000                          |
| Maximum peak in Final Diff. Map          | 2.57 e $^{-}/\text{\AA}^3$     |
| Minimum peak in Final Diff. Map          | -1.88 e $^{-}/\text{\AA}^3$    |

Table 1. Atomic coordinates and B<sub>iso</sub>/B<sub>eq</sub>

| atom  | x           | y           | z           | B <sub>eq</sub> |
|-------|-------------|-------------|-------------|-----------------|
| S(1)  | 0.15596(14) | 0.02435(12) | 0.34459(6)  | 4.61(2)         |
| O(2)  | 0.2022(3)   | 0.0311(2)   | 0.44156(12) | 5.71(6)         |
| O(3)  | -0.0105(3)  | -0.1184(2)  | 0.29708(14) | 5.84(6)         |
| N(4)  | -0.1105(4)  | 0.2347(4)   | 0.4402(2)   | 5.08(8)         |
| N(5)  | 0.3867(3)   | 0.0793(3)   | 0.21465(17) | 4.85(7)         |
| N(6)  | 0.3827(3)   | 0.0469(3)   | 0.30511(16) | 4.63(7)         |
| C(7)  | 0.2867(4)   | 0.1826(4)   | 0.1841(2)   | 4.27(9)         |
| C(8)  | 0.1602(4)   | 0.2618(4)   | 0.2353(2)   | 4.26(9)         |
| C(9)  | 0.1007(5)   | 0.4016(4)   | 0.2092(2)   | 4.94(10)        |
| C(10) | -0.0940(5)  | 0.4077(4)   | 0.3335(2)   | 4.62(9)         |
| C(11) | -0.0250(4)  | 0.2751(3)   | 0.3634(2)   | 4.25(9)         |
| C(12) | 0.0986(4)   | 0.2015(3)   | 0.3149(2)   | 3.92(8)         |
| C(13) | 0.3087(5)   | 0.2131(4)   | 0.0888(2)   | 5.09(10)        |
| C(14) | -0.2361(5)  | 0.3384(4)   | 0.4577(2)   | 5.39(11)        |
| C(15) | -0.2297(5)  | 0.4425(4)   | 0.3938(2)   | 4.97(10)        |
| C(16) | -0.0251(5)  | 0.4720(4)   | 0.2567(2)   | 5.21(10)        |
| C(17) | 0.1332(6)   | 0.2074(4)   | 0.0239(2)   | 6.00(12)        |
| C(18) | 0.1535(8)   | 0.2286(5)   | -0.0653(2)  | 7.38(14)        |
| C(19) | 0.4842(8)   | -0.0850(6)  | 0.3247(3)   | 5.97(14)        |
| C(20) | 0.5039(7)   | 0.2390(5)   | 0.0615(2)   | 7.72(14)        |
| C(21) | -0.3483(5)  | 0.5725(4)   | 0.3862(2)   | 7.05(12)        |
| C(22) | 0.5238(9)   | 0.2633(7)   | -0.0280(3)  | 10.39(19)       |
| C(23) | 0.3507(9)   | 0.2562(6)   | -0.0915(3)  | 8.83(17)        |
| H(1)  | -0.109(4)   | 0.149(3)    | 0.470(2)    | 6.4(9)          |
| H(2)  | -0.312(3)   | 0.326(2)    | 0.5186(15)  | 3.5(6)          |
| H(3)  | -0.063(3)   | 0.570(3)    | 0.2376(16)  | 5.0(7)          |
| H(4)  | 0.147(3)    | 0.451(3)    | 0.1541(16)  | 4.5(6)          |
| H(5)  | -0.2586     | 0.6722      | 0.4209      | 8.97            |
| H(6)  | -0.4777     | 0.5370      | 0.4102      | 8.97            |
| H(7)  | -0.3816     | 0.5904      | 0.3244      | 8.96            |
| H(8)  | 0.383(4)    | -0.188(3)   | 0.295(2)    | 6.7(11)         |
| H(9)  | 0.503(4)    | -0.095(3)   | 0.3884(19)  | 5.3(8)          |
| H(10) | 0.617(5)    | -0.059(3)   | 0.299(2)    | 7.5(10)         |
| H(11) | 0.625(4)    | 0.253(3)    | 0.1047(19)  | 5.5(8)          |
| H(12) | -0.006(4)   | 0.189(3)    | 0.0416(17)  | 4.5(7)          |
| H(13) | 0.035(4)    | 0.220(3)    | -0.112(2)   | 7.2(10)         |
| H(14) | 0.356(5)    | 0.269(3)    | -0.158(2)   | 8.7(10)         |

Table 1. Atomic coordinates and B<sub>iso</sub>/B<sub>eq</sub> (continued)

| atom  | x        | y        | z         | B <sub>eq</sub> |
|-------|----------|----------|-----------|-----------------|
| H(15) | 0.655(5) | 0.271(4) | -0.044(2) | 8.6(12)         |

$$B_{eq} = 8/3 \pi^2 (U_{11}(aa^*)^2 + U_{22}(bb^*)^2 + U_{33}(cc^*)^2 + 2U_{12}(aa^*bb^*)\cos \gamma + 2U_{13}(aa^*cc^*)\cos \beta + 2U_{23}(bb^*cc^*)\cos \alpha)$$

Table 2. Anisotropic displacement parameters

| atom  | U <sub>11</sub> | U <sub>22</sub> | U <sub>33</sub> | U <sub>12</sub> | U <sub>13</sub> | U <sub>23</sub> |
|-------|-----------------|-----------------|-----------------|-----------------|-----------------|-----------------|
| S(1)  | 0.0686(6)       | 0.0651(7)       | 0.0559(5)       | 0.0373(5)       | 0.0156(4)       | 0.0192(5)       |
| O(2)  | 0.1001(18)      | 0.0891(19)      | 0.0509(13)      | 0.0549(15)      | 0.0237(12)      | 0.0274(13)      |
| O(3)  | 0.0667(15)      | 0.0561(17)      | 0.0956(18)      | 0.0176(13)      | 0.0054(14)      | 0.0044(14)      |
| N(4)  | 0.075(2)        | 0.064(2)        | 0.065(2)        | 0.0331(18)      | 0.0184(16)      | 0.0201(19)      |
| N(5)  | 0.0669(18)      | 0.069(2)        | 0.0562(18)      | 0.0287(16)      | 0.0140(14)      | 0.0141(16)      |
| N(6)  | 0.0661(18)      | 0.068(2)        | 0.0542(17)      | 0.0362(16)      | 0.0107(14)      | 0.0168(15)      |
| C(7)  | 0.053(2)        | 0.056(2)        | 0.052(2)        | 0.0137(18)      | 0.0063(16)      | 0.0101(19)      |
| C(8)  | 0.062(2)        | 0.053(2)        | 0.052(2)        | 0.0252(19)      | 0.0086(17)      | 0.0105(19)      |
| C(9)  | 0.079(2)        | 0.057(2)        | 0.056(2)        | 0.025(2)        | 0.009(2)        | 0.017(2)        |
| C(10) | 0.064(2)        | 0.053(2)        | 0.063(2)        | 0.0276(19)      | 0.0059(18)      | 0.011(2)        |
| C(11) | 0.062(2)        | 0.051(2)        | 0.053(2)        | 0.0230(19)      | 0.0080(17)      | 0.0094(19)      |
| C(12) | 0.057(2)        | 0.048(2)        | 0.049(2)        | 0.0234(18)      | 0.0062(16)      | 0.0086(18)      |
| C(13) | 0.070(2)        | 0.074(2)        | 0.054(2)        | 0.024(2)        | 0.015(2)        | 0.015(2)        |
| C(14) | 0.080(2)        | 0.062(2)        | 0.071(2)        | 0.031(2)        | 0.017(2)        | 0.011(2)        |
| C(15) | 0.061(2)        | 0.054(2)        | 0.079(2)        | 0.027(2)        | 0.009(2)        | 0.005(2)        |
| C(16) | 0.081(2)        | 0.056(2)        | 0.073(2)        | 0.038(2)        | 0.009(2)        | 0.018(2)        |
| C(17) | 0.081(3)        | 0.091(3)        | 0.061(2)        | 0.033(2)        | 0.013(2)        | 0.013(2)        |
| C(18) | 0.114(4)        | 0.111(4)        | 0.057(3)        | 0.039(3)        | 0.005(2)        | 0.016(2)        |
| C(19) | 0.075(3)        | 0.090(4)        | 0.079(3)        | 0.049(3)        | 0.012(2)        | 0.022(3)        |
| C(20) | 0.084(3)        | 0.153(4)        | 0.066(3)        | 0.043(3)        | 0.017(2)        | 0.031(3)        |
| C(21) | 0.097(2)        | 0.079(3)        | 0.108(3)        | 0.049(2)        | 0.019(2)        | 0.015(2)        |
| C(22) | 0.118(4)        | 0.228(6)        | 0.089(3)        | 0.087(4)        | 0.051(3)        | 0.061(4)        |
| C(23) | 0.139(4)        | 0.163(5)        | 0.063(3)        | 0.074(4)        | 0.039(3)        | 0.040(3)        |

The general temperature factor expression:  $\exp(-2\pi^2(a^2U_{11}h^2 + b^2U_{22}k^2 + c^2U_{33}l^2 + 2a*b*U_{12}hk + 2a*c*U_{13}hl + 2b*c*U_{23}kl))$

Table 3. Bond lengths (Å)

| atom  | atom  | distance | atom  | atom  | distance |
|-------|-------|----------|-------|-------|----------|
| S(1)  | O(2)  | 1.428(2) | S(1)  | O(3)  | 1.442(2) |
| S(1)  | N(6)  | 1.644(2) | S(1)  | C(12) | 1.725(3) |
| N(4)  | C(11) | 1.373(4) | N(4)  | C(14) | 1.395(5) |
| N(4)  | H(1)  | 0.89(3)  | N(5)  | N(6)  | 1.401(3) |
| N(5)  | C(7)  | 1.305(4) | N(6)  | C(19) | 1.480(6) |
| C(7)  | C(8)  | 1.460(5) | C(7)  | C(13) | 1.485(4) |
| C(8)  | C(9)  | 1.415(5) | C(8)  | C(12) | 1.399(4) |
| C(9)  | C(16) | 1.382(5) | C(9)  | H(4)  | 1.00(2)  |
| C(10) | C(11) | 1.406(5) | C(10) | C(15) | 1.420(5) |
| C(10) | C(16) | 1.389(5) | C(11) | C(12) | 1.394(4) |
| C(13) | C(17) | 1.380(5) | C(13) | C(20) | 1.363(6) |
| C(14) | C(15) | 1.348(5) | C(14) | H(2)  | 1.09(2)  |
| C(15) | C(21) | 1.518(5) | C(16) | H(3)  | 0.99(3)  |
| C(17) | C(18) | 1.377(6) | C(17) | H(12) | 0.96(2)  |
| C(18) | C(23) | 1.367(8) | C(18) | H(13) | 0.95(3)  |
| C(19) | H(8)  | 0.97(2)  | C(19) | H(9)  | 0.95(2)  |
| C(19) | H(10) | 0.97(3)  | C(20) | C(22) | 1.386(7) |
| C(20) | H(11) | 0.92(2)  | C(21) | H(5)  | 0.950    |
| C(21) | H(6)  | 0.950    | C(21) | H(7)  | 0.950    |
| C(22) | C(23) | 1.354(8) | C(22) | H(15) | 0.92(3)  |
| C(23) | H(14) | 1.02(3)  |       |       |          |

Table 4. Bond angles ( $^{\circ}$ )

| atom  | atom  | atom  | angle      | atom  | atom  | atom  | angle      |
|-------|-------|-------|------------|-------|-------|-------|------------|
| O(2)  | S(1)  | O(3)  | 116.12(13) | O(2)  | S(1)  | N(6)  | 108.15(13) |
| O(2)  | S(1)  | C(12) | 110.50(14) | O(3)  | S(1)  | N(6)  | 111.56(14) |
| O(3)  | S(1)  | C(12) | 109.83(14) | N(6)  | S(1)  | C(12) | 99.41(14)  |
| C(11) | N(4)  | C(14) | 108.2(3)   | C(11) | N(4)  | H(1)  | 129(2)     |
| C(14) | N(4)  | H(1)  | 122(2)     | N(6)  | N(5)  | C(7)  | 118.2(2)   |
| S(1)  | N(6)  | N(5)  | 118.4(2)   | S(1)  | N(6)  | C(19) | 113.2(2)   |
| N(5)  | N(6)  | C(19) | 110.6(3)   | N(5)  | C(7)  | C(8)  | 125.1(2)   |
| N(5)  | C(7)  | C(13) | 113.7(3)   | C(8)  | C(7)  | C(13) | 121.2(3)   |
| C(7)  | C(8)  | C(9)  | 122.6(3)   | C(7)  | C(8)  | C(12) | 119.5(3)   |
| C(9)  | C(8)  | C(12) | 117.8(3)   | C(8)  | C(9)  | C(16) | 122.0(3)   |
| C(8)  | C(9)  | H(4)  | 119.9(16)  | C(16) | C(9)  | H(4)  | 118.1(16)  |
| C(11) | C(10) | C(15) | 106.8(3)   | C(11) | C(10) | C(16) | 118.4(3)   |
| C(15) | C(10) | C(16) | 134.8(3)   | N(4)  | C(11) | C(10) | 107.8(3)   |
| N(4)  | C(11) | C(12) | 130.4(3)   | C(10) | C(11) | C(12) | 121.7(3)   |
| S(1)  | C(12) | C(8)  | 118.6(2)   | S(1)  | C(12) | C(11) | 121.3(2)   |
| C(8)  | C(12) | C(11) | 119.8(3)   | C(7)  | C(13) | C(17) | 121.8(3)   |
| C(7)  | C(13) | C(20) | 120.3(3)   | C(17) | C(13) | C(20) | 117.8(3)   |
| N(4)  | C(14) | C(15) | 109.3(3)   | N(4)  | C(14) | H(2)  | 117.7(14)  |
| C(15) | C(14) | H(2)  | 132.9(14)  | C(10) | C(15) | C(14) | 107.9(3)   |
| C(10) | C(15) | C(21) | 125.7(3)   | C(14) | C(15) | C(21) | 126.5(3)   |
| C(9)  | C(16) | C(10) | 120.1(3)   | C(9)  | C(16) | H(3)  | 120.5(16)  |
| C(10) | C(16) | H(3)  | 119.3(16)  | C(13) | C(17) | C(18) | 121.5(4)   |
| C(13) | C(17) | H(12) | 119.2(15)  | C(18) | C(17) | H(12) | 119.3(15)  |
| C(17) | C(18) | C(23) | 120.1(4)   | C(17) | C(18) | H(13) | 123(2)     |
| C(23) | C(18) | H(13) | 116(2)     | N(6)  | C(19) | H(8)  | 107(2)     |
| N(6)  | C(19) | H(9)  | 110.8(19)  | N(6)  | C(19) | H(10) | 107(2)     |
| H(8)  | C(19) | H(9)  | 106(2)     | H(8)  | C(19) | H(10) | 112(2)     |
| H(9)  | C(19) | H(10) | 115(2)     | C(13) | C(20) | C(22) | 120.4(4)   |
| C(13) | C(20) | H(11) | 119.0(19)  | C(22) | C(20) | H(11) | 120.1(19)  |
| C(15) | C(21) | H(5)  | 108.3      | C(15) | C(21) | H(6)  | 109.0      |
| C(15) | C(21) | H(7)  | 111.1      | H(5)  | C(21) | H(6)  | 109.5      |
| H(5)  | C(21) | H(7)  | 109.5      | H(6)  | C(21) | H(7)  | 109.5      |
| C(20) | C(22) | C(23) | 121.5(5)   | C(20) | C(22) | H(15) | 117(2)     |
| C(23) | C(22) | H(15) | 121(2)     | C(18) | C(23) | C(22) | 118.7(4)   |
| C(18) | C(23) | H(14) | 116.7(19)  | C(22) | C(23) | H(14) | 124.6(19)  |

Table 5. Torsion Angles( $^{\circ}$ )

| atom1 | atom2 | atom3 | atom4 | angle     | atom1 | atom2 | atom3 | atom4 | angle     |
|-------|-------|-------|-------|-----------|-------|-------|-------|-------|-----------|
| O(2)  | S(1)  | N(6)  | N(5)  | -166.7(2) | O(2)  | S(1)  | N(6)  | C(19) | 61.5(2)   |
| O(2)  | S(1)  | C(12) | C(8)  | 146.3(2)  | O(2)  | S(1)  | C(12) | C(11) | -40.1(2)  |
| O(3)  | S(1)  | N(6)  | N(5)  | 64.4(2)   | O(3)  | S(1)  | N(6)  | C(19) | -67.4(2)  |
| O(3)  | S(1)  | C(12) | C(8)  | -84.4(2)  | O(3)  | S(1)  | C(12) | C(11) | 89.3(2)   |
| N(6)  | S(1)  | C(12) | C(8)  | 32.8(2)   | N(6)  | S(1)  | C(12) | C(11) | -153.6(2) |
| C(12) | S(1)  | N(6)  | N(5)  | -51.4(2)  | C(12) | S(1)  | N(6)  | C(19) | 176.8(2)  |
| C(11) | N(4)  | C(14) | C(15) | -0.3(3)   | C(14) | N(4)  | C(11) | C(10) | 1.2(3)    |
| C(14) | N(4)  | C(11) | C(12) | -175.3(2) | N(6)  | N(5)  | C(7)  | C(8)  | -3.4(3)   |
| N(6)  | N(5)  | C(7)  | C(13) | 177.6(2)  | C(7)  | N(5)  | N(6)  | S(1)  | 41.2(3)   |
| C(7)  | N(5)  | N(6)  | C(19) | 174.2(2)  | N(5)  | C(7)  | C(8)  | C(9)  | 163.8(2)  |
| N(5)  | C(7)  | C(8)  | C(12) | -14.6(4)  | N(5)  | C(7)  | C(13) | C(17) | 132.1(3)  |
| N(5)  | C(7)  | C(13) | C(20) | -44.3(4)  | C(8)  | C(7)  | C(13) | C(17) | -46.9(4)  |
| C(8)  | C(7)  | C(13) | C(20) | 136.7(3)  | C(13) | C(7)  | C(8)  | C(9)  | -17.3(4)  |
| C(13) | C(7)  | C(8)  | C(12) | 164.4(2)  | C(7)  | C(8)  | C(9)  | C(16) | 177.8(2)  |
| C(7)  | C(8)  | C(12) | S(1)  | -5.3(3)   | C(7)  | C(8)  | C(12) | C(11) | -179.0(2) |
| C(9)  | C(8)  | C(12) | S(1)  | 176.3(2)  | C(9)  | C(8)  | C(12) | C(11) | 2.6(3)    |
| C(12) | C(8)  | C(9)  | C(16) | -3.8(4)   | C(8)  | C(9)  | C(16) | C(10) | 1.2(4)    |
| C(11) | C(10) | C(15) | C(14) | 1.5(3)    | C(11) | C(10) | C(15) | C(21) | -177.6(2) |
| C(15) | C(10) | C(11) | N(4)  | -1.7(3)   | C(15) | C(10) | C(11) | C(12) | 175.2(2)  |
| C(11) | C(10) | C(16) | C(9)  | 2.7(4)    | C(16) | C(10) | C(11) | N(4)  | 179.2(2)  |
| C(16) | C(10) | C(11) | C(12) | -3.9(4)   | C(15) | C(10) | C(16) | C(9)  | -176.1(3) |
| C(16) | C(10) | C(15) | C(14) | -179.6(3) | C(16) | C(10) | C(15) | C(21) | 1.3(5)    |
| N(4)  | C(11) | C(12) | S(1)  | 3.7(4)    | N(4)  | C(11) | C(12) | C(8)  | 177.3(2)  |
| C(10) | C(11) | C(12) | S(1)  | -172.3(2) | C(10) | C(11) | C(12) | C(8)  | 1.2(3)    |
| C(7)  | C(13) | C(17) | C(18) | -177.1(3) | C(7)  | C(13) | C(20) | C(22) | 178.4(4)  |
| C(17) | C(13) | C(20) | C(22) | 1.8(6)    | C(20) | C(13) | C(17) | C(18) | -0.6(5)   |
| N(4)  | C(14) | C(15) | C(10) | -0.8(3)   | N(4)  | C(14) | C(15) | C(21) | 178.4(2)  |
| C(13) | C(17) | C(18) | C(23) | -0.1(5)   | C(17) | C(18) | C(23) | C(22) | -0.4(6)   |
| C(13) | C(20) | C(22) | C(23) | -2.4(8)   | C(20) | C(22) | C(23) | C(18) | 1.7(8)    |

The sign is positive if when looking from atom 2 to atom 3 a clock-wise motion of atom 1 would superimpose it on atom 4.



Table 6. Distances beyond the asymmetric unit out to 3.60 Å

| atom  | atom                 | distance  | atom  | atom                 | distance  |
|-------|----------------------|-----------|-------|----------------------|-----------|
| S(1)  | H(1) <sup>11</sup>   | 3.24(3)   | S(1)  | H(10) <sup>21</sup>  | 3.36(3)   |
| O(2)  | O(2) <sup>11</sup>   | 3.322(3)  | O(2)  | N(4) <sup>11</sup>   | 2.962(3)  |
| O(2)  | H(1) <sup>11</sup>   | 2.11(3)   | O(2)  | H(2) <sup>31</sup>   | 3.443(19) |
| O(2)  | H(2) <sup>11</sup>   | 3.38(2)   | O(2)  | H(5) <sup>41</sup>   | 3.024     |
| O(2)  | H(9) <sup>51</sup>   | 2.87(2)   | O(3)  | C(16) <sup>61</sup>  | 3.458(4)  |
| O(3)  | C(18) <sup>71</sup>  | 3.431(4)  | O(3)  | C(19) <sup>21</sup>  | 3.479(6)  |
| O(3)  | C(21) <sup>61</sup>  | 3.431(3)  | O(3)  | C(23) <sup>71</sup>  | 3.432(5)  |
| O(3)  | H(1) <sup>11</sup>   | 3.49(3)   | O(3)  | H(3) <sup>61</sup>   | 2.64(2)   |
| O(3)  | H(5) <sup>61</sup>   | 3.003     | O(3)  | H(7) <sup>61</sup>   | 3.057     |
| O(3)  | H(10) <sup>21</sup>  | 2.63(3)   | O(3)  | H(13) <sup>71</sup>  | 2.79(3)   |
| O(3)  | H(14) <sup>71</sup>  | 2.77(2)   | N(4)  | O(2) <sup>11</sup>   | 2.962(3)  |
| N(4)  | N(6) <sup>21</sup>   | 3.506(3)  | N(4)  | C(15) <sup>41</sup>  | 3.550(3)  |
| N(4)  | C(19) <sup>21</sup>  | 3.374(5)  | N(4)  | C(21) <sup>41</sup>  | 3.580(3)  |
| N(4)  | H(5) <sup>41</sup>   | 2.832     | N(4)  | H(9) <sup>21</sup>   | 3.17(2)   |
| N(4)  | H(10) <sup>21</sup>  | 3.08(2)   | N(5)  | H(13) <sup>71</sup>  | 3.28(2)   |
| N(6)  | N(4) <sup>31</sup>   | 3.506(3)  | N(6)  | C(14) <sup>31</sup>  | 3.410(3)  |
| C(7)  | H(13) <sup>71</sup>  | 3.48(2)   | C(8)  | H(6) <sup>31</sup>   | 3.480     |
| C(8)  | H(7) <sup>31</sup>   | 3.498     | C(9)  | H(7) <sup>31</sup>   | 3.455     |
| C(9)  | H(8) <sup>81</sup>   | 3.50(2)   | C(9)  | H(11) <sup>21</sup>  | 3.14(2)   |
| C(10) | H(2) <sup>41</sup>   | 3.359(19) | C(10) | H(11) <sup>21</sup>  | 3.59(2)   |
| C(11) | H(5) <sup>41</sup>   | 3.407     | C(11) | H(6) <sup>31</sup>   | 3.599     |
| C(11) | H(10) <sup>21</sup>  | 3.12(2)   | C(12) | H(6) <sup>31</sup>   | 3.425     |
| C(12) | H(10) <sup>21</sup>  | 3.29(2)   | C(14) | N(6) <sup>21</sup>   | 3.410(3)  |
| C(14) | C(14) <sup>41</sup>  | 3.518(4)  | C(14) | C(15) <sup>41</sup>  | 3.461(4)  |
| C(14) | H(5) <sup>41</sup>   | 3.508     | C(14) | H(6) <sup>91</sup>   | 3.215     |
| C(14) | H(9) <sup>11</sup>   | 3.54(2)   | C(15) | N(4) <sup>41</sup>   | 3.550(3)  |
| C(15) | C(14) <sup>41</sup>  | 3.461(4)  | C(15) | H(2) <sup>41</sup>   | 3.55(2)   |
| C(16) | O(3) <sup>81</sup>   | 3.458(4)  | C(16) | H(8) <sup>81</sup>   | 3.30(2)   |
| C(16) | H(11) <sup>21</sup>  | 3.06(2)   | C(16) | H(13) <sup>101</sup> | 3.53(3)   |
| C(17) | C(17) <sup>71</sup>  | 3.443(5)  | C(17) | H(12) <sup>71</sup>  | 3.28(2)   |
| C(17) | H(15) <sup>21</sup>  | 3.35(3)   | C(18) | O(3) <sup>71</sup>   | 3.431(4)  |
| C(18) | H(3) <sup>101</sup>  | 3.27(2)   | C(18) | H(12) <sup>71</sup>  | 3.48(2)   |
| C(18) | H(15) <sup>21</sup>  | 3.43(3)   | C(19) | O(3) <sup>31</sup>   | 3.479(6)  |
| C(19) | N(4) <sup>31</sup>   | 3.374(5)  | C(19) | C(21) <sup>111</sup> | 3.525(7)  |
| C(19) | H(1) <sup>31</sup>   | 3.24(2)   | C(19) | H(2) <sup>11</sup>   | 3.34(2)   |
| C(19) | H(5) <sup>111</sup>  | 3.295     | C(19) | H(7) <sup>111</sup>  | 3.118     |
| C(19) | H(14) <sup>121</sup> | 3.27(3)   | C(20) | H(12) <sup>31</sup>  | 3.40(2)   |

Table 6. Distances beyond the asymmetric unit out to 3.60 Å (continued)

| atom  | atom                 | distance | atom  | atom                 | distance  |
|-------|----------------------|----------|-------|----------------------|-----------|
| C(21) | O(3) <sup>8)</sup>   | 3.431(3) | C(21) | N(4) <sup>4)</sup>   | 3.580(3)  |
| C(21) | C(19) <sup>13)</sup> | 3.525(7) | C(21) | H(1) <sup>4)</sup>   | 3.56(2)   |
| C(21) | H(2) <sup>9)</sup>   | 3.08(2)  | C(21) | H(6) <sup>9)</sup>   | 3.499     |
| C(21) | H(8) <sup>13)</sup>  | 3.29(3)  | C(21) | H(9) <sup>13)</sup>  | 3.23(3)   |
| C(21) | H(10) <sup>13)</sup> | 3.53(3)  | C(22) | H(12) <sup>3)</sup>  | 3.35(2)   |
| C(23) | O(3) <sup>7)</sup>   | 3.432(5) | C(23) | H(3) <sup>10)</sup>  | 3.37(2)   |
| C(23) | H(10) <sup>12)</sup> | 3.47(3)  | H(1)  | S(1) <sup>1)</sup>   | 3.24(3)   |
| H(1)  | O(2) <sup>1)</sup>   | 2.11(3)  | H(1)  | O(3) <sup>1)</sup>   | 3.49(3)   |
| H(1)  | C(19) <sup>2)</sup>  | 3.24(2)  | H(1)  | C(21) <sup>4)</sup>  | 3.56(2)   |
| H(1)  | H(1) <sup>1)</sup>   | 3.35(4)  | H(1)  | H(5) <sup>4)</sup>   | 2.689     |
| H(1)  | H(9) <sup>2)</sup>   | 2.84(3)  | H(1)  | H(9) <sup>1)</sup>   | 3.51(4)   |
| H(1)  | H(10) <sup>2)</sup>  | 3.01(3)  | H(2)  | O(2) <sup>2)</sup>   | 3.443(19) |
| H(2)  | O(2) <sup>1)</sup>   | 3.38(2)  | H(2)  | C(10) <sup>4)</sup>  | 3.359(19) |
| H(2)  | C(15) <sup>4)</sup>  | 3.55(2)  | H(2)  | C(19) <sup>1)</sup>  | 3.34(2)   |
| H(2)  | C(21) <sup>9)</sup>  | 3.08(2)  | H(2)  | H(5) <sup>9)</sup>   | 3.080     |
| H(2)  | H(6) <sup>9)</sup>   | 2.344    | H(2)  | H(7) <sup>9)</sup>   | 3.448     |
| H(2)  | H(8) <sup>1)</sup>   | 3.15(4)  | H(2)  | H(9) <sup>1)</sup>   | 2.63(3)   |
| H(3)  | O(3) <sup>8)</sup>   | 2.64(2)  | H(3)  | C(18) <sup>10)</sup> | 3.27(2)   |
| H(3)  | C(23) <sup>10)</sup> | 3.37(2)  | H(3)  | H(8) <sup>8)</sup>   | 3.03(3)   |
| H(3)  | H(11) <sup>2)</sup>  | 3.21(3)  | H(3)  | H(13) <sup>10)</sup> | 2.68(4)   |
| H(3)  | H(14) <sup>10)</sup> | 2.83(4)  | H(4)  | H(7) <sup>3)</sup>   | 3.557     |
| H(4)  | H(8) <sup>8)</sup>   | 3.41(3)  | H(4)  | H(11) <sup>2)</sup>  | 3.32(3)   |
| H(4)  | H(13) <sup>10)</sup> | 3.40(4)  | H(4)  | H(14) <sup>14)</sup> | 3.46(3)   |
| H(4)  | H(15) <sup>14)</sup> | 3.08(4)  | H(5)  | O(2) <sup>4)</sup>   | 3.024     |
| H(5)  | O(3) <sup>8)</sup>   | 3.003    | H(5)  | N(4) <sup>4)</sup>   | 2.832     |
| H(5)  | C(11) <sup>4)</sup>  | 3.407    | H(5)  | C(14) <sup>4)</sup>  | 3.508     |
| H(5)  | C(19) <sup>13)</sup> | 3.295    | H(5)  | H(1) <sup>4)</sup>   | 2.689     |
| H(5)  | H(2) <sup>9)</sup>   | 3.080    | H(5)  | H(6) <sup>9)</sup>   | 3.572     |
| H(5)  | H(8) <sup>13)</sup>  | 3.328    | H(5)  | H(9) <sup>13)</sup>  | 2.868     |
| H(5)  | H(10) <sup>13)</sup> | 3.227    | H(6)  | C(8) <sup>2)</sup>   | 3.480     |
| H(6)  | C(11) <sup>2)</sup>  | 3.599    | H(6)  | C(12) <sup>2)</sup>  | 3.425     |
| H(6)  | C(14) <sup>9)</sup>  | 3.215    | H(6)  | C(21) <sup>9)</sup>  | 3.499     |
| H(6)  | H(2) <sup>9)</sup>   | 2.344    | H(6)  | H(5) <sup>9)</sup>   | 3.572     |
| H(6)  | H(6) <sup>9)</sup>   | 2.836    | H(6)  | H(8) <sup>13)</sup>  | 3.258     |
| H(6)  | H(9) <sup>13)</sup>  | 3.205    | H(7)  | O(3) <sup>8)</sup>   | 3.057     |
| H(7)  | C(8) <sup>2)</sup>   | 3.498    | H(7)  | C(9) <sup>2)</sup>   | 3.455     |
| H(7)  | C(19) <sup>13)</sup> | 3.118    | H(7)  | H(2) <sup>9)</sup>   | 3.448     |

Table 6. Distances beyond the asymmetric unit out to 3.60 Å (continued)

| atom  | atom                 | distance | atom  | atom                 | distance |
|-------|----------------------|----------|-------|----------------------|----------|
| H(7)  | H(4) <sup>2)</sup>   | 3.557    | H(7)  | H(8) <sup>13)</sup>  | 2.764    |
| H(7)  | H(9) <sup>13)</sup>  | 3.088    | H(7)  | H(10) <sup>13)</sup> | 3.032    |
| H(7)  | H(14) <sup>10)</sup> | 2.842    | H(8)  | C(9) <sup>6)</sup>   | 3.50(2)  |
| H(8)  | C(16) <sup>6)</sup>  | 3.30(2)  | H(8)  | C(21) <sup>11)</sup> | 3.29(3)  |
| H(8)  | H(2) <sup>1)</sup>   | 3.15(4)  | H(8)  | H(3) <sup>6)</sup>   | 3.03(3)  |
| H(8)  | H(4) <sup>6)</sup>   | 3.41(3)  | H(8)  | H(5) <sup>11)</sup>  | 3.328    |
| H(8)  | H(6) <sup>11)</sup>  | 3.258    | H(8)  | H(7) <sup>11)</sup>  | 2.764    |
| H(8)  | H(13) <sup>7)</sup>  | 3.52(4)  | H(8)  | H(14) <sup>12)</sup> | 2.99(5)  |
| H(9)  | O(2) <sup>5)</sup>   | 2.87(2)  | H(9)  | N(4) <sup>3)</sup>   | 3.17(2)  |
| H(9)  | C(14) <sup>1)</sup>  | 3.54(2)  | H(9)  | C(21) <sup>11)</sup> | 3.23(3)  |
| H(9)  | H(1) <sup>3)</sup>   | 2.84(3)  | H(9)  | H(1) <sup>1)</sup>   | 3.51(4)  |
| H(9)  | H(2) <sup>1)</sup>   | 2.63(3)  | H(9)  | H(5) <sup>11)</sup>  | 2.868    |
| H(9)  | H(6) <sup>11)</sup>  | 3.205    | H(9)  | H(7) <sup>11)</sup>  | 3.088    |
| H(9)  | H(9) <sup>5)</sup>   | 3.59(4)  | H(10) | S(1) <sup>3)</sup>   | 3.36(3)  |
| H(10) | O(3) <sup>3)</sup>   | 2.63(3)  | H(10) | N(4) <sup>3)</sup>   | 3.08(2)  |
| H(10) | C(11) <sup>3)</sup>  | 3.12(2)  | H(10) | C(12) <sup>3)</sup>  | 3.29(2)  |
| H(10) | C(21) <sup>11)</sup> | 3.53(3)  | H(10) | C(23) <sup>12)</sup> | 3.47(3)  |
| H(10) | H(1) <sup>3)</sup>   | 3.01(3)  | H(10) | H(5) <sup>11)</sup>  | 3.227    |
| H(10) | H(7) <sup>11)</sup>  | 3.032    | H(10) | H(14) <sup>12)</sup> | 2.70(4)  |
| H(11) | C(9) <sup>3)</sup>   | 3.14(2)  | H(11) | C(10) <sup>3)</sup>  | 3.59(2)  |
| H(11) | C(16) <sup>3)</sup>  | 3.06(2)  | H(11) | H(3) <sup>3)</sup>   | 3.21(3)  |
| H(11) | H(4) <sup>3)</sup>   | 3.32(3)  | H(11) | H(12) <sup>3)</sup>  | 2.88(4)  |
| H(12) | C(17) <sup>7)</sup>  | 3.28(2)  | H(12) | C(18) <sup>7)</sup>  | 3.48(2)  |
| H(12) | C(20) <sup>2)</sup>  | 3.40(2)  | H(12) | C(22) <sup>2)</sup>  | 3.35(2)  |
| H(12) | H(11) <sup>2)</sup>  | 2.88(4)  | H(12) | H(12) <sup>7)</sup>  | 3.39(3)  |
| H(12) | H(15) <sup>2)</sup>  | 2.68(4)  | H(13) | O(3) <sup>7)</sup>   | 2.79(3)  |
| H(13) | N(5) <sup>7)</sup>   | 3.28(2)  | H(13) | C(7) <sup>7)</sup>   | 3.48(2)  |
| H(13) | C(16) <sup>10)</sup> | 3.53(3)  | H(13) | H(3) <sup>10)</sup>  | 2.68(4)  |
| H(13) | H(4) <sup>10)</sup>  | 3.40(4)  | H(13) | H(8) <sup>7)</sup>   | 3.52(4)  |
| H(13) | H(15) <sup>2)</sup>  | 2.94(5)  | H(14) | O(3) <sup>7)</sup>   | 2.77(2)  |
| H(14) | C(19) <sup>12)</sup> | 3.27(3)  | H(14) | H(3) <sup>10)</sup>  | 2.83(4)  |
| H(14) | H(4) <sup>14)</sup>  | 3.46(3)  | H(14) | H(7) <sup>10)</sup>  | 2.842    |
| H(14) | H(8) <sup>12)</sup>  | 2.99(5)  | H(14) | H(10) <sup>12)</sup> | 2.70(4)  |
| H(15) | C(17) <sup>3)</sup>  | 3.35(3)  | H(15) | C(18) <sup>3)</sup>  | 3.43(3)  |
| H(15) | H(4) <sup>14)</sup>  | 3.08(4)  | H(15) | H(12) <sup>3)</sup>  | 2.68(4)  |
| H(15) | H(13) <sup>3)</sup>  | 2.94(5)  |       |                      |          |

Symmetry Operators:

- |                    |                   |
|--------------------|-------------------|
| (1) -X,-Y,-Z+1     | (2) X-1,Y,Z       |
| (3) X+1,Y,Z        | (4) -X,-Y+1,-Z+1  |
| (5) -X+1,-Y,-Z+1   | (6) X,Y-1,Z       |
| (7) -X,-Y,-Z       | (8) X,Y+1,Z       |
| (9) -X-1,-Y+1,-Z+1 | (10) -X,-Y+1,-Z   |
| (11) X+1,Y-1,Z     | (12) -X+1,-Y,-Z   |
| (13) X-1,Y+1,Z     | (14) -X+1,-Y+1,-Z |

Table 7. Intramolecular and Intermolecular Hydrogen bonds

| D    | H    | A             | D...A    | D-H     | H...A   | D-H...A |
|------|------|---------------|----------|---------|---------|---------|
| N(4) | H(1) | O(2)          | 3.023(4) | 0.89(3) | 2.58(3) | 112(2)  |
| N(4) | H(1) | O(2)[2:0:0:1] | 2.962(3) | 0.89(3) | 2.11(3) | 159(3)  |

Note) 1. The symmetry operations are applied to the acceptors.  
2. Estimated standard deviations (esd's) are shown in the parentheses.  
They are not calculated when all atoms have an esd=0.0.
