# Supplementary material for: Thiadiazino-indole, thiadiazino-carbazole and benzothiadiazino-carbazole dioxides: synthesis, physicochemical and early ADME characterization of representatives of new tri-, tetra- and pentacyclic ring systems and their intermediates
Source: publisher site journal article supplement (doi:10.3762/bjoc.21.169), 2025-10-21
Supplement: Additional file 2 [file 7a_xrd.pdf › Átnevezett XRD/7a_xrd.pdf]

**142698**

**PGY0530\_1C**

Submitted by: Pusztai Gyongyver  
Operator: Dancso Andras

X-ray Structure Report

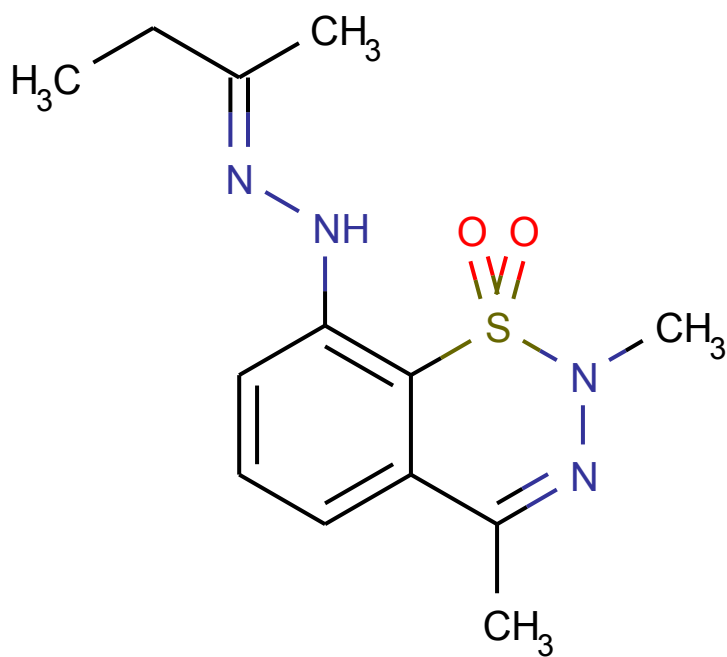

January 7, 2025

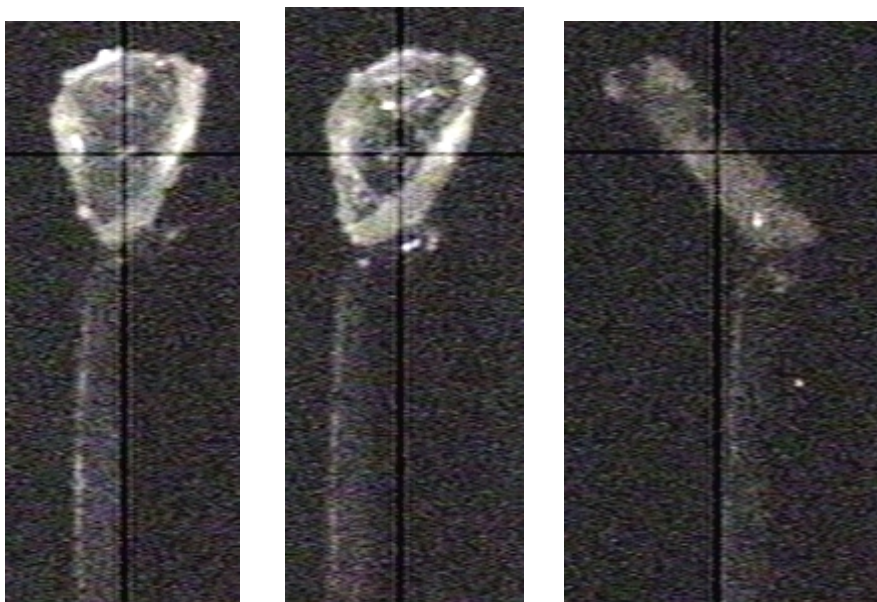

Fig. 1. The crystal

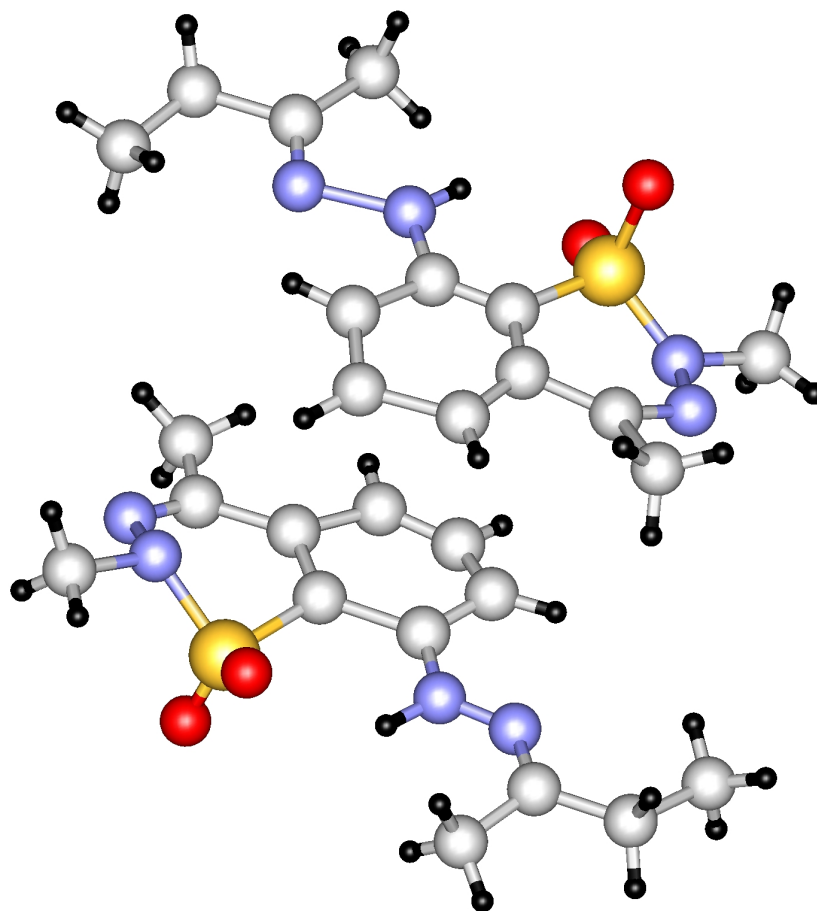

Fig. 2. Molecules in pair (hydrogens were generated by the software)

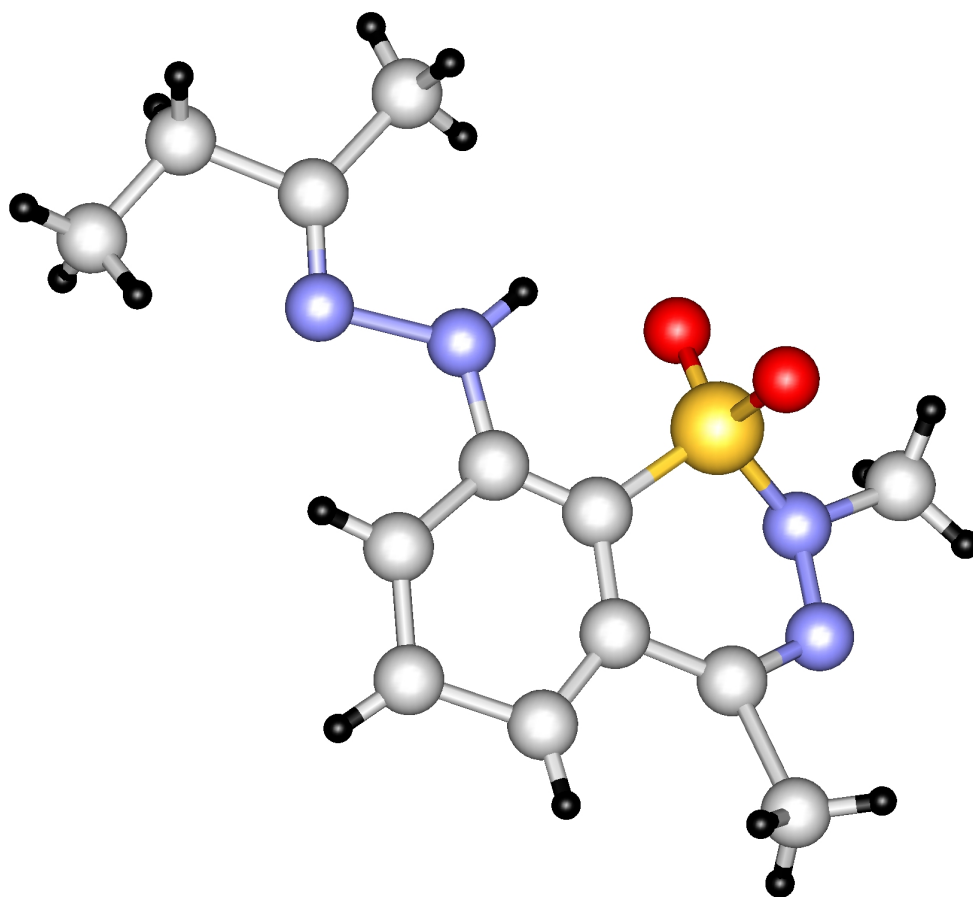

Fig. 3. Fragment 1

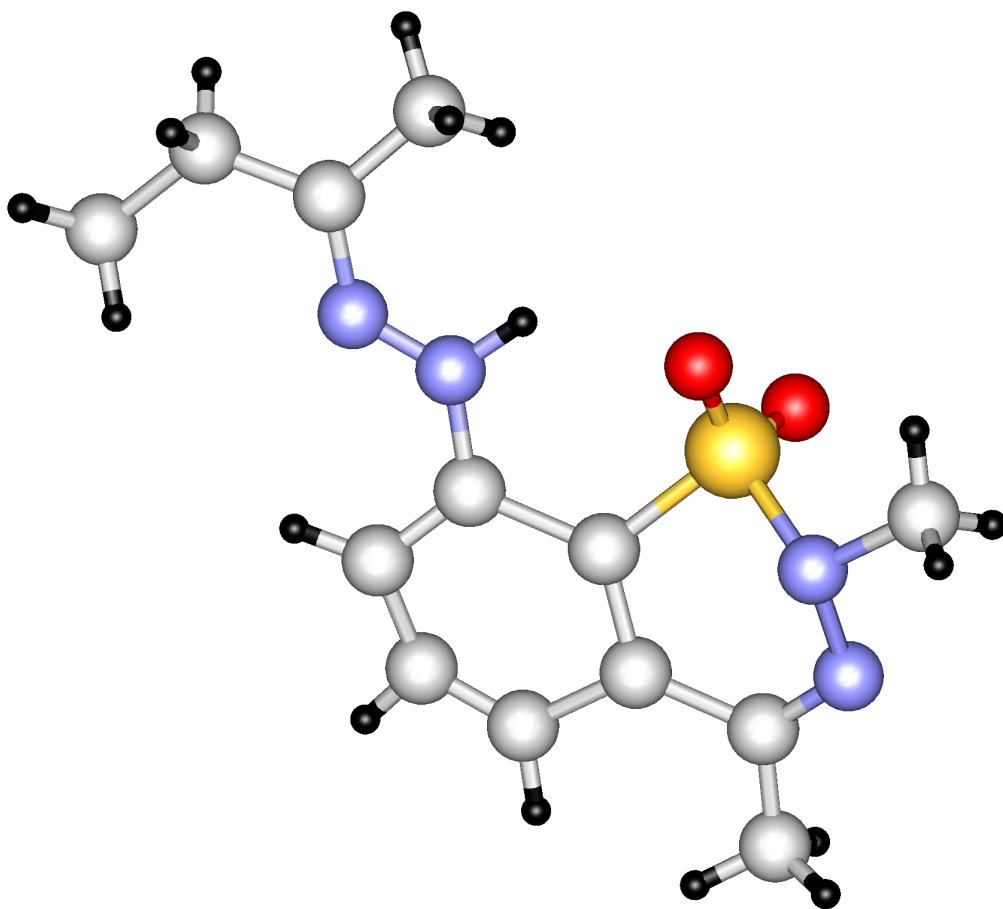

Fig. 4. Fragment 2

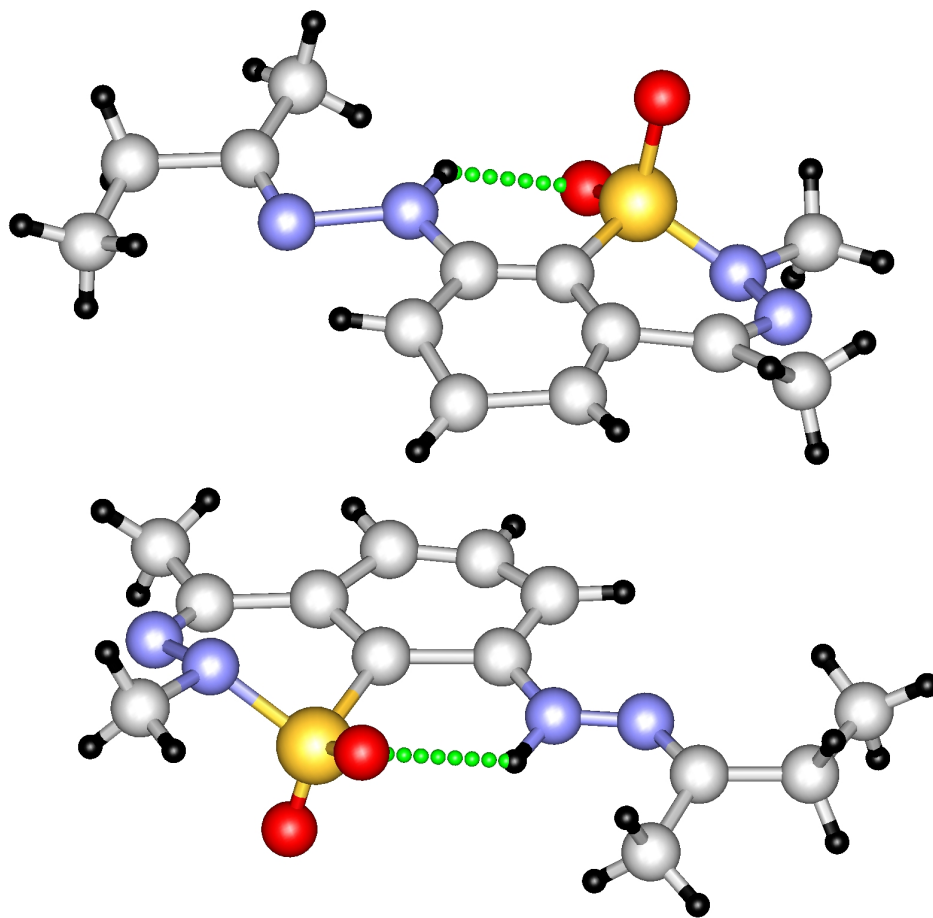

Fig 5. Hydrogen bonds

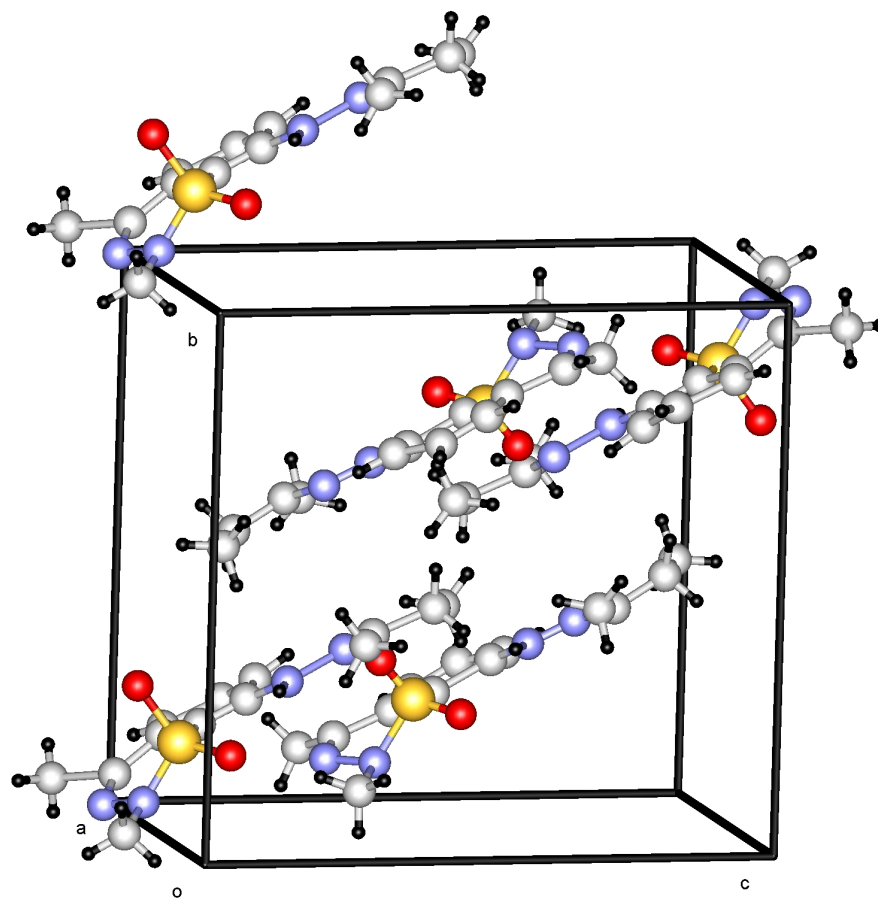

Fig. 6. Packing

## *Experimental*

### Data Collection

A colorless chunk crystal of  $C_{13}H_{18}N_4O_2S$  having approximate dimensions of 0.32 x 0.19 x 0.09 mm was mounted on a cactus needle. All measurements were made on a Rigaku RAXIS RAPID imaging plate area detector with graphite monochromated Cu-K $\alpha$  radiation.

Indexing was performed from 4 oscillations that were exposed for 300 seconds. The crystal-to-detector distance was 127.40 mm.

Cell constants and an orientation matrix for data collection corresponded to a primitive triclinic cell with dimensions:

$$\begin{aligned}a &= 8.5535(15) \text{ \AA} & \alpha &= 89.323(11)^\circ \\b &= 12.697(3) \text{ \AA} & \beta &= 89.449(9)^\circ \\c &= 13.488(3) \text{ \AA} & \gamma &= 86.785(11)^\circ \\V &= 1462.3(5) \text{ \AA}^3\end{aligned}$$

For  $Z = 4$  and F.W. = 294.37, the calculated density is 1.337 g/cm<sup>3</sup>. Based on a statistical analysis of intensity distribution, and the successful solution and refinement of the structure, the space group was determined to be:

### P-1 (#2)

The data were collected at a temperature of  $20 \pm 1^\circ\text{C}$  to a maximum  $2\theta$  value of  $143.2^\circ$ . A total of 180 oscillation images were collected. A sweep of data was done using  $\omega$  scans from  $20.0$  to  $200.0^\circ$  in  $5.0^\circ$  step, at  $\chi=0.0^\circ$  and  $\phi = 0.0^\circ$ . The exposure rate was 60.0 [sec./ $^\circ$ ]. A second sweep was performed using  $\omega$  scans from  $20.0$  to  $200.0^\circ$  in  $5.0^\circ$  step, at  $\chi=54.0^\circ$  and  $\phi = 0.0^\circ$ . The exposure rate was 60.0 [sec./ $^\circ$ ]. Another sweep was performed using  $\omega$  scans from  $20.0$  to  $200.0^\circ$  in  $5.0^\circ$  step, at  $\chi=54.0^\circ$  and  $\phi = 90.0^\circ$ . The exposure rate was 60.0 [sec./ $^\circ$ ]. Another sweep was performed using  $\omega$  scans from  $20.0$  to  $200.0^\circ$  in  $5.0^\circ$  step, at  $\chi=54.0^\circ$  and  $\phi = 180.0^\circ$ . The exposure rate was 60.0 [sec./ $^\circ$ ]. Another sweep was performed using  $\omega$  scans from  $20.0$  to  $200.0^\circ$  in  $5.0^\circ$  step, at  $\chi=54.0^\circ$  and  $\phi = 270.0^\circ$ . The exposure rate was 60.0 [sec./ $^\circ$ ]. The crystal-to-detector distance was 127.40 mm. Readout was performed in the 0.100 mm pixel mode.



## Data Reduction

Of the 17061 reflections that were collected, 5193 were unique ( $R_{\text{int}} = 0.039$ ).

The linear absorption coefficient,  $\mu$ , for Cu-K $\alpha$  radiation is 20.381 cm<sup>-1</sup>. An empirical absorption correction was applied which resulted in transmission factors ranging from 0.622 to 0.836. The data were corrected for Lorentz and polarization effects.

## Structure Solution and Refinement

The structure was solved by direct methods<sup>1</sup> and expanded using Fourier techniques<sup>2</sup>. The non-hydrogen atoms were refined anisotropically. Hydrogen atoms were refined using the riding model. The final cycle of full-matrix least-squares refinement<sup>3</sup> on F was based on 6866 observed reflections ( $I > 2.00\sigma(I)$ ) and 397 variable parameters and converged (largest parameter shift was 0.00 times its esd) with unweighted and weighted agreement factors of:

$$R = \sum ||F_o| - |F_c|| / \sum |F_o| = 0.0634$$

$$R_w = [ \sum w (|F_o| - |F_c|)^2 / \sum w F_o^2 ]^{1/2} = 0.0767$$

The standard deviation of an observation of unit weight<sup>4</sup> was 0.94. A Robust-resistant weighting scheme was used<sup>5</sup>. Plots of  $\sum w (|F_o| - |F_c|)^2$  versus  $|F_o|$ , reflection order in data collection,  $\sin \theta/\lambda$  and various classes of indices showed no unusual trends. The maximum and minimum peaks on the final difference Fourier map corresponded to 3.09 and -6.19 e<sup>-</sup>/Å<sup>3</sup>, respectively.

Neutral atom scattering factors were taken from Cromer and Waber<sup>6</sup>. Anomalous dispersion effects were included in  $F_{\text{calc}}$ <sup>7</sup>; the values for  $\Delta f'$  and  $\Delta f''$  were those of Creagh and McAuley<sup>8</sup>. The values for the mass attenuation coefficients are those of Creagh and Hubbell<sup>9</sup>. All calculations were performed using the CrystalStructure<sup>10,11</sup> crystallographic software package.

## *References*

- (1) SIR92: Altomare, A., Cascarano, G., Giacovazzo, C., Guagliardi, A., Burla, M., Polidori, G., and Camalli, M. (1994) J. Appl. Cryst., 27, 435.
- (2) DIRDIF99: Beurskens, P.T., Admiraal, G., Beurskens, G., Bosman, W.P., de Gelder, R., Israel, R. and Smits, J.M.M.(1999). The DIRDIF-99 program system, Technical Report of the Crystallography Laboratory, University of Nijmegen, The Netherlands.

(3) Least Squares function minimized:

$$\sum w(|F_o| - |F_c|)^2 \quad \text{where } w = \text{Least Squares weights.}$$

(4) Standard deviation of an observation of unit weight:

$$[\sum w(|F_o| - |F_c|)^2 / (N_o - N_v)]^{1/2}$$

where:  $N_o$  = number of observations

$N_v$  = number of variables

(5) Carruthers, J.R. and Watkin, D.J. (1979), Acta Cryst, A35, 698-699

(6) Cromer, D. T. & Waber, J. T.; "International Tables for X-ray Crystallography", Vol. IV, The Kynoch Press, Birmingham, England, Table 2.2 A (1974).

(7) Ibers, J. A. & Hamilton, W. C.; Acta Crystallogr., 17, 781 (1964).

(8) Creagh, D. C. & McAuley, W.J. ; "International Tables for Crystallography", Vol C, (A.J.C. Wilson, ed.), Kluwer Academic Publishers, Boston, Table 4.2.6.8, pages 219-222 (1992).

(9) Creagh, D. C. & Hubbell, J.H.; "International Tables for Crystallography", Vol C, (A.J.C. Wilson, ed.), Kluwer Academic Publishers, Boston, Table 4.2.4.3, pages 200-206 (1992).

(10) CrystalStructure 3.7.0: Crystal Structure Analysis Package, Rigaku and Rigaku/MSO (2000-2005). 9009 New Trails Dr. The Woodlands TX 77381 USA.

(11) CRYSTALS Issue 10: Watkin, D.J., Prout, C.K. Carruthers, J.R. & Betteridge, P.W. Chemical Crystallography Laboratory, Oxford, UK. (1996)

## EXPERIMENTAL DETAILS

### A. Crystal Data

|                         |                                                                                                                                                                                                                        |
|-------------------------|------------------------------------------------------------------------------------------------------------------------------------------------------------------------------------------------------------------------|
| Empirical Formula       | $\text{C}_{13}\text{H}_{18}\text{N}_4\text{O}_2\text{S}$                                                                                                                                                               |
| Formula Weight          | 294.37                                                                                                                                                                                                                 |
| Crystal Color, Habit    | colorless, chunk                                                                                                                                                                                                       |
| Crystal Dimensions      | 0.32 X 0.19 X 0.09 mm                                                                                                                                                                                                  |
| Crystal System          | triclinic                                                                                                                                                                                                              |
| Lattice Type            | Primitive                                                                                                                                                                                                              |
| Indexing Images         | 4 oscillations @ 300.0 seconds                                                                                                                                                                                         |
| Detector Position       | 127.40 mm                                                                                                                                                                                                              |
| Pixel Size              | 0.100 mm                                                                                                                                                                                                               |
| Lattice Parameters      | $a = 8.5535(15) \text{ \AA}$<br>$b = 12.697(3) \text{ \AA}$<br>$c = 13.488(3) \text{ \AA}$<br>$\alpha = 89.323(11)^\circ$<br>$\beta = 89.449(9)^\circ$<br>$\gamma = 86.785(11)^\circ$<br>$V = 1462.3(5) \text{ \AA}^3$ |
| Space Group             | P-1 (#2)                                                                                                                                                                                                               |
| Z value                 | 4                                                                                                                                                                                                                      |
| $D_{\text{calc}}$       | $1.337 \text{ g/cm}^3$                                                                                                                                                                                                 |
| $F_{000}$               | 624.00                                                                                                                                                                                                                 |
| $\mu(\text{CuK}\alpha)$ | $20.381 \text{ cm}^{-1}$                                                                                                                                                                                               |

## B. Intensity Measurements

|                                                           |                                                                       |
|-----------------------------------------------------------|-----------------------------------------------------------------------|
| Diffractometer                                            | Rigaku RAXIS-RAPID                                                    |
| Radiation                                                 | CuK $\alpha$ ( $\lambda$ = 1.54187 Å)<br>graphite monochromated       |
| Detector Aperture                                         | 280 mm x 256 mm                                                       |
| Data Images                                               | 180 exposures                                                         |
| $\omega$ oscillation Range ( $\chi$ =0.0, $\phi$ =0.0)    | 20.0 - 200.0 $^{\circ}$                                               |
| Exposure Rate                                             | 60.0 sec./ $^{\circ}$                                                 |
| $\omega$ oscillation Range ( $\chi$ =54.0, $\phi$ =0.0)   | 20.0 - 200.0 $^{\circ}$                                               |
| Exposure Rate                                             | 60.0 sec./ $^{\circ}$                                                 |
| $\omega$ oscillation Range ( $\chi$ =54.0, $\phi$ =90.0)  | 20.0 - 200.0 $^{\circ}$                                               |
| Exposure Rate                                             | 60.0 sec./ $^{\circ}$                                                 |
| $\omega$ oscillation Range ( $\chi$ =54.0, $\phi$ =180.0) | 20.0 - 200.0 $^{\circ}$                                               |
| Exposure Rate                                             | 60.0 sec./ $^{\circ}$                                                 |
| $\omega$ oscillation Range ( $\chi$ =54.0, $\phi$ =270.0) | 20.0 - 200.0 $^{\circ}$                                               |
| Exposure Rate                                             | 60.0 sec./ $^{\circ}$                                                 |
| Detector Position                                         | 127.40 mm                                                             |
| Pixel Size                                                | 0.100 mm                                                              |
| $2\theta_{\text{max}}$                                    | 143.2 $^{\circ}$                                                      |
| No. of Reflections Measured                               | Total: 17061<br>Unique: 5193 ( $R_{\text{int}}$ = 0.039)              |
| Corrections                                               | Lorentz-polarization<br>Absorption<br>(trans. factors: 0.622 - 0.836) |

### C. Structure Solution and Refinement

|                                          |                                                                 |
|------------------------------------------|-----------------------------------------------------------------|
| Structure Solution                       | Direct Methods (SIR92)                                          |
| Refinement                               | Full-matrix least-squares on F                                  |
| Function Minimized                       | $\Sigma w ( Fo  -  Fc )^2$                                      |
| Least Squares Weights                    | Chebyshev polynomial with 3 parameters<br>8.3806,3.2289,4.9198, |
| $2\theta_{\max}$ cutoff                  | 143.2 $^{\circ}$                                                |
| Anomalous Dispersion                     | All non-hydrogen atoms                                          |
| No. Observations ( $I > 2.00\sigma(I)$ ) | 6866                                                            |
| No. Variables                            | 397                                                             |
| Reflection/Parameter Ratio               | 17.29                                                           |
| Residuals: R ( $I > 2.00\sigma(I)$ )     | 0.0634                                                          |
| Residuals: Rw ( $I > 2.00\sigma(I)$ )    | 0.0767                                                          |
| Goodness of Fit Indicator                | 0.937                                                           |
| Max Shift/Error in Final Cycle           | 0.001                                                           |
| Maximum peak in Final Diff. Map          | 3.09 e $^{-}/\text{\AA}^3$                                      |
| Minimum peak in Final Diff. Map          | -6.19 e $^{-}/\text{\AA}^3$                                     |

Table 1. Atomic coordinates and  $B_{\text{iso}}/B_{\text{eq}}$

| atom  | x           | y          | z          | $B_{\text{eq}}$ |
|-------|-------------|------------|------------|-----------------|
| S(1)  | 0.1918(3)   | 1.2009(2)  | -0.0191(2) | 3.83(4)         |
| S(2)  | 0.2989(3)   | 0.7881(2)  | 0.5218(2)  | 4.41(5)         |
| O(3)  | 0.3164(12)  | 0.7147(7)  | 0.5842(7)  | 4.22(12)        |
| O(4)  | 0.4228(8)   | 0.8019(9)  | 0.4583(7)  | 5.40(14)        |
| O(5)  | 0.1913(13)  | 1.3041(7)  | -0.0947(8) | 5.68(17)        |
| O(6)  | 0.0496(8)   | 1.1912(8)  | 0.0480(7)  | 5.00(14)        |
| N(1)  | 0.2646(14)  | 1.3561(9)  | 0.2802(7)  | 6.5(2)          |
| N(7)  | 0.1246(9)   | 0.9141(5)  | 0.6440(5)  | 3.18(12)        |
| N(8)  | 0.2158(11)  | 1.0898(9)  | -0.0745(9) | 4.02(16)        |
| N(9)  | 0.2600(11)  | 0.9060(9)  | 0.5798(9)  | 4.07(16)        |
| N(10) | 0.3561(10)  | 1.0698(6)  | -0.1213(5) | 3.77(14)        |
| N(11) | 0.2490(10)  | 0.6552(6)  | 0.2333(5)  | 3.33(12)        |
| N(13) | 0.2294(8)   | 1.3033(7)  | 0.1752(5)  | 4.35(13)        |
| N(14) | 0.2386(9)   | 0.6974(7)  | 0.3123(6)  | 4.66(16)        |
| C(1)  | 0.1209(12)  | 0.7971(8)  | 0.4563(6)  | 2.67(15)        |
| C(15) | 0.3613(12)  | 1.2124(9)  | 0.0447(8)  | 3.95(19)        |
| C(17) | 0.5057(13)  | 1.1772(6)  | 0.0037(7)  | 3.33(14)        |
| C(18) | -0.0060(10) | 0.8438(6)  | 0.5082(7)  | 2.70(13)        |
| C(19) | 0.4833(9)   | 1.1107(7)  | -0.0808(5) | 4.06(15)        |
| C(20) | 0.4061(10)  | 0.9404(9)  | 0.6307(8)  | 4.8(2)          |
| C(21) | 0.6733(9)   | 1.2218(8)  | 0.1361(8)  | 4.29(16)        |
| C(22) | 0.3613(10)  | 1.2569(7)  | 0.1259(6)  | 4.20(16)        |
| C(23) | -0.1406(13) | 0.8223(9)  | 0.4503(8)  | 3.99(17)        |
| C(24) | 0.379(2)    | 0.6181(11) | 0.1860(11) | 6.5(2)          |
| C(25) | 0.6596(12)  | 1.1742(9)  | 0.0324(9)  | 4.75(19)        |
| C(26) | 0.1086(7)   | 0.7404(6)  | 0.3546(5)  | 2.23(11)        |
| C(27) | -0.0210(17) | 0.7430(9)  | 0.3090(7)  | 4.55(18)        |
| C(28) | -0.1366(10) | 0.7725(9)  | 0.3714(9)  | 5.3(2)          |
| C(29) | -0.1384(11) | 0.9239(7)  | 0.6476(7)  | 6.5(2)          |
| C(30) | 0.5223(11)  | 0.6027(10) | 0.2373(6)  | 6.0(2)          |
| C(31) | -0.0033(6)  | 0.8896(5)  | 0.6083(4)  | 1.79(10)        |
| C(32) | 0.6392(9)   | 1.0863(7)  | -0.1654(7) | 4.84(16)        |
| C(33) | 0.5258(15)  | 1.2739(7)  | 0.1688(6)  | 3.59(16)        |
| C(34) | 0.0895(12)  | 1.0481(9)  | -0.1284(8) | 6.2(2)          |
| C(35) | 0.1340(17)  | 1.4440(10) | 0.4132(9)  | 8.1(3)          |
| C(36) | 0.1339(14)  | 1.3973(9)  | 0.3074(10) | 4.20(18)        |
| C(37) | 0.2921(14)  | 1.4291(8)  | 0.4572(7)  | 9.8(3)          |

Table 1. Atomic coordinates and  $B_{\text{iso}}/B_{\text{eq}}$  (continued)

| atom  | x           | y          | z          | $B_{\text{eq}}$ |
|-------|-------------|------------|------------|-----------------|
| C(38) | -0.0410(16) | 1.3982(13) | 0.2653(11) | 12.5(4)         |
| C(39) | 0.1953(11)  | 0.5539(5)  | 0.0499(6)  | 7.7(2)          |
| C(40) | 0.3564(12)  | 0.5632(8)  | 0.0948(9)  | 5.5(2)          |
| H(1)  | 0.1306      | 1.2975     | 0.1447     | 5.21            |
| H(2)  | 0.3322      | 0.6962     | 0.3498     | 5.65            |
| H(3)  | 0.7623      | 1.2176     | 0.1779     | 5.14            |
| H(4)  | -0.2341     | 0.8507     | 0.4808     | 4.72            |
| H(5)  | 0.7502      | 1.1495     | -0.0035    | 5.73            |
| H(6)  | -0.0317     | 0.7116     | 0.2460     | 5.46            |
| H(7)  | -0.2406     | 0.7605     | 0.3522     | 6.33            |
| H(8)  | 0.5310      | 1.3163     | 0.2261     | 4.32            |
| H(9)  | 0.1041      | 1.5171     | 0.4093     | 9.67            |
| H(10) | 0.0616      | 1.4092     | 0.4542     | 9.68            |
| H(11) | 0.4054      | 0.6049     | 0.0460     | 6.58            |
| H(12) | 0.4058      | 0.4943     | 0.0959     | 6.56            |
| H(13) | 0.3946      | 0.9157     | 0.6970     | 5.76            |
| H(14) | 0.4075      | 1.0151     | 0.6301     | 5.76            |
| H(15) | 0.5015      | 0.9111     | 0.6034     | 5.77            |
| H(16) | -0.1639     | 0.8739     | 0.6972     | 7.96            |
| H(17) | -0.2181     | 0.9283     | 0.5989     | 7.98            |
| H(18) | -0.1303     | 0.9910     | 0.6769     | 7.99            |
| H(19) | 0.5732      | 0.6669     | 0.2297     | 7.16            |
| H(20) | 0.5868      | 0.5465     | 0.2105     | 7.14            |
| H(21) | 0.5037      | 0.5893     | 0.3057     | 7.15            |
| H(22) | 0.6892      | 1.0190     | -0.1519    | 5.67            |
| H(23) | 0.7132      | 1.1390     | -0.1603    | 5.63            |
| H(24) | 0.5979      | 1.0874     | -0.2305    | 5.64            |
| H(25) | 0.0414      | 1.0031     | -0.0819    | 7.53            |
| H(26) | 0.1226      | 1.0087     | -0.1850    | 7.51            |
| H(27) | 0.0165      | 1.1035     | -0.1479    | 7.50            |
| H(28) | 0.3023      | 1.3630     | 0.4908     | 12.00           |
| H(29) | 0.3151      | 1.4837     | 0.5014     | 12.00           |
| H(30) | 0.3631      | 1.4291     | 0.4025     | 12.02           |
| H(31) | -0.0476     | 1.4564     | 0.2204     | 15.22           |
| H(32) | -0.1235     | 1.4054     | 0.3128     | 15.22           |
| H(33) | -0.0497     | 1.3346     | 0.2299     | 15.22           |
| H(34) | 0.1624      | 0.4865     | 0.0694     | 9.12            |

Table 1. Atomic coordinates and  $B_{\text{iso}}/B_{\text{eq}}$  (continued)

| atom  | x      | y      | z       | $B_{\text{eq}}$ |
|-------|--------|--------|---------|-----------------|
| H(35) | 0.2031 | 0.5577 | -0.0203 | 9.11            |
| H(36) | 0.1211 | 0.6069 | 0.0726  | 9.12            |

$$B_{\text{eq}} = 8/3 \pi^2 (U_{11}(aa^*)^2 + U_{22}(bb^*)^2 + U_{33}(cc^*)^2 + 2U_{12}(aa^*bb^*)\cos \gamma + 2U_{13}(aa^*cc^*)\cos \beta + 2U_{23}(bb^*cc^*)\cos \alpha)$$

Table 2. Anisotropic displacement parameters

| atom  | U <sub>11</sub> | U <sub>22</sub> | U <sub>33</sub> | U <sub>12</sub> | U <sub>13</sub> | U <sub>23</sub> |
|-------|-----------------|-----------------|-----------------|-----------------|-----------------|-----------------|
| S(1)  | 0.0413(11)      | 0.0610(13)      | 0.0438(12)      | -0.0069(8)      | -0.0160(9)      | 0.0008(10)      |
| S(2)  | 0.0430(11)      | 0.0608(14)      | 0.0643(16)      | -0.0070(9)      | 0.0222(9)       | -0.0238(12)     |
| O(3)  | 0.073(3)        | 0.036(2)        | 0.052(3)        | -0.002(2)       | -0.021(2)       | 0.023(2)        |
| O(4)  | 0.022(2)        | 0.105(4)        | 0.080(3)        | -0.018(2)       | 0.034(2)        | -0.031(3)       |
| O(5)  | 0.070(3)        | 0.070(4)        | 0.075(4)        | 0.001(3)        | 0.007(2)        | 0.008(3)        |
| O(6)  | 0.035(3)        | 0.091(3)        | 0.066(3)        | -0.022(2)       | 0.013(2)        | -0.009(2)       |
| N(1)  | 0.106(6)        | 0.087(5)        | 0.057(4)        | -0.030(4)       | 0.003(4)        | -0.032(3)       |
| N(7)  | 0.042(3)        | 0.043(3)        | 0.034(3)        | -0.000(2)       | 0.024(2)        | 0.004(2)        |
| N(8)  | 0.038(4)        | 0.060(4)        | 0.055(4)        | -0.005(2)       | 0.014(3)        | -0.010(3)       |
| N(9)  | 0.029(3)        | 0.073(4)        | 0.055(4)        | -0.021(2)       | 0.003(2)        | -0.020(3)       |
| N(10) | 0.057(3)        | 0.057(3)        | 0.032(3)        | -0.029(2)       | 0.014(2)        | 0.004(2)        |
| N(11) | 0.063(3)        | 0.040(3)        | 0.023(2)        | -0.007(2)       | 0.004(2)        | -0.006(2)       |
| N(13) | 0.037(2)        | 0.091(4)        | 0.037(3)        | 0.009(2)        | -0.004(2)       | -0.035(2)       |
| N(14) | 0.056(4)        | 0.081(4)        | 0.042(3)        | -0.024(3)       | -0.007(2)       | 0.000(3)        |
| C(1)  | 0.038(3)        | 0.045(4)        | 0.019(3)        | -0.003(2)       | -0.000(2)       | 0.003(3)        |
| C(15) | 0.036(3)        | 0.044(4)        | 0.070(6)        | 0.002(3)        | 0.003(3)        | -0.015(4)       |
| C(17) | 0.062(4)        | 0.030(3)        | 0.035(3)        | -0.007(2)       | 0.003(2)        | -0.011(2)       |
| C(18) | 0.036(2)        | 0.030(3)        | 0.037(3)        | -0.001(2)       | 0.004(2)        | -0.019(2)       |
| C(19) | 0.046(3)        | 0.073(4)        | 0.033(4)        | 0.015(2)        | 0.033(2)        | 0.002(3)        |
| C(20) | 0.035(4)        | 0.074(5)        | 0.073(6)        | -0.018(3)       | 0.018(3)        | -0.021(5)       |
| C(21) | 0.027(3)        | 0.068(4)        | 0.068(4)        | 0.004(2)        | -0.025(2)       | -0.019(3)       |
| C(22) | 0.041(3)        | 0.065(4)        | 0.055(5)        | -0.011(2)       | -0.030(2)       | 0.009(3)        |
| C(23) | 0.041(3)        | 0.060(4)        | 0.048(4)        | 0.015(3)        | 0.010(3)        | 0.008(3)        |
| C(24) | 0.133(10)       | 0.063(6)        | 0.053(5)        | -0.028(5)       | 0.010(6)        | 0.002(4)        |
| C(25) | 0.041(4)        | 0.069(5)        | 0.071(5)        | -0.006(3)       | -0.001(3)       | -0.028(4)       |
| C(26) | 0.033(3)        | 0.042(2)        | 0.011(2)        | -0.008(2)       | -0.006(2)       | -0.009(2)       |
| C(27) | 0.075(4)        | 0.066(5)        | 0.032(4)        | -0.009(3)       | -0.003(3)       | 0.019(3)        |
| C(28) | 0.037(4)        | 0.074(4)        | 0.089(5)        | -0.001(3)       | -0.037(4)       | 0.004(4)        |
| C(29) | 0.090(6)        | 0.091(5)        | 0.071(5)        | -0.043(4)       | 0.017(4)        | -0.048(4)       |
| C(30) | 0.044(4)        | 0.131(8)        | 0.052(4)        | -0.001(4)       | 0.033(3)        | -0.023(5)       |
| C(31) | 0.028(2)        | 0.037(2)        | 0.003(2)        | -0.0067(18)     | 0.0182(18)      | -0.006(2)       |
| C(32) | 0.044(4)        | 0.074(4)        | 0.061(4)        | 0.032(3)        | 0.018(3)        | 0.019(3)        |
| C(33) | 0.072(4)        | 0.036(3)        | 0.029(4)        | -0.008(3)       | -0.007(3)       | -0.002(3)       |
| C(34) | 0.096(6)        | 0.070(5)        | 0.072(7)        | -0.026(4)       | -0.039(4)       | 0.001(5)        |
| C(35) | 0.175(11)       | 0.082(7)        | 0.050(6)        | 0.011(6)        | 0.022(6)        | -0.035(5)       |
| C(36) | 0.060(4)        | 0.041(4)        | 0.060(5)        | -0.014(3)       | 0.043(3)        | -0.011(3)       |
| C(37) | 0.144(8)        | 0.188(9)        | 0.048(5)        | -0.081(6)       | 0.054(5)        | 0.001(5)        |

Table 2. Anisotropic displacement parameters (continued)

| atom  | U <sub>11</sub> | U <sub>22</sub> | U <sub>33</sub> | U <sub>12</sub> | U <sub>13</sub> | U <sub>23</sub> |
|-------|-----------------|-----------------|-----------------|-----------------|-----------------|-----------------|
| C(38) | 0.091(8)        | 0.187(13)       | 0.205(12)       | -0.047(8)       | 0.003(7)        | -0.057(10)      |
| C(39) | 0.140(7)        | 0.055(4)        | 0.094(6)        | 0.034(4)        | -0.046(5)       | -0.046(4)       |
| C(40) | 0.069(5)        | 0.050(5)        | 0.088(8)        | -0.008(3)       | 0.028(4)        | 0.005(5)        |

The general temperature factor expression:  $\exp(-2\pi^2(a^2U_{11}h^2 + b^2U_{22}k^2 + c^2U_{33}l^2 + 2a*b*U_{12}hk + 2a*c*U_{13}hl + 2b*c*U_{23}kl))$



Table 3. Bond lengths (Å)

| atom  | atom  | distance  | atom  | atom  | distance  |
|-------|-------|-----------|-------|-------|-----------|
| S(1)  | O(5)  | 1.652(10) | S(1)  | O(6)  | 1.518(8)  |
| S(1)  | N(8)  | 1.606(12) | S(1)  | C(15) | 1.707(11) |
| S(2)  | O(3)  | 1.252(10) | S(2)  | O(4)  | 1.373(9)  |
| S(2)  | N(9)  | 1.712(12) | S(2)  | C(1)  | 1.765(10) |
| N(1)  | N(13) | 1.612(13) | N(1)  | C(36) | 1.261(17) |
| N(7)  | N(9)  | 1.439(13) | N(7)  | C(31) | 1.256(10) |
| N(8)  | N(10) | 1.363(13) | N(8)  | C(34) | 1.436(16) |
| N(9)  | C(20) | 1.519(14) | N(10) | C(19) | 1.353(12) |
| N(11) | N(14) | 1.198(11) | N(11) | C(24) | 1.341(18) |
| N(13) | C(22) | 1.408(11) | N(13) | H(1)  | 0.950     |
| N(14) | C(26) | 1.337(10) | N(14) | H(2)  | 0.950     |
| C(1)  | C(18) | 1.392(13) | C(1)  | C(26) | 1.565(11) |
| C(15) | C(17) | 1.400(15) | C(15) | C(22) | 1.238(15) |
| C(17) | C(19) | 1.447(13) | C(17) | C(25) | 1.374(15) |
| C(18) | C(23) | 1.438(14) | C(18) | C(31) | 1.478(11) |
| C(19) | C(32) | 1.764(11) | C(20) | H(13) | 0.950     |
| C(20) | H(14) | 0.950     | C(20) | H(15) | 0.950     |
| C(21) | C(25) | 1.538(16) | C(21) | C(33) | 1.459(15) |
| C(21) | H(3)  | 0.950     | C(22) | C(33) | 1.554(15) |
| C(23) | C(28) | 1.244(17) | C(23) | H(4)  | 0.950     |
| C(24) | C(30) | 1.418(19) | C(24) | C(40) | 1.440(19) |
| C(25) | H(5)  | 0.950     | C(26) | C(27) | 1.271(15) |
| C(27) | C(28) | 1.333(16) | C(27) | H(6)  | 0.950     |
| C(28) | H(7)  | 0.950     | C(29) | C(31) | 1.319(11) |
| C(29) | H(16) | 0.950     | C(29) | H(17) | 0.950     |
| C(29) | H(18) | 0.950     | C(30) | H(19) | 0.950     |
| C(30) | H(20) | 0.950     | C(30) | H(21) | 0.950     |
| C(32) | H(22) | 0.950     | C(32) | H(23) | 0.950     |
| C(32) | H(24) | 0.950     | C(33) | H(8)  | 0.950     |
| C(34) | H(25) | 0.950     | C(34) | H(26) | 0.950     |
| C(34) | H(27) | 0.950     | C(35) | C(36) | 1.551(18) |
| C(35) | C(37) | 1.483(18) | C(35) | H(9)  | 0.950     |
| C(35) | H(10) | 0.950     | C(36) | C(38) | 1.604(19) |
| C(37) | H(28) | 0.950     | C(37) | H(29) | 0.950     |
| C(37) | H(30) | 0.950     | C(38) | H(31) | 0.950     |
| C(38) | H(32) | 0.950     | C(38) | H(33) | 0.950     |
| C(39) | C(40) | 1.521(14) | C(39) | H(34) | 0.950     |

Table 3. Bond lengths (Å) (continued)

| atom  | atom  | distance | atom  | atom  | distance |
|-------|-------|----------|-------|-------|----------|
| C(39) | H(35) | 0.950    | C(39) | H(36) | 0.950    |
| C(40) | H(11) | 0.950    | C(40) | H(12) | 0.950    |

Table 4. Bond angles (°)

| atom  | atom  | atom  | angle     | atom  | atom  | atom  | angle     |
|-------|-------|-------|-----------|-------|-------|-------|-----------|
| O(5)  | S(1)  | O(6)  | 117.0(5)  | O(5)  | S(1)  | N(8)  | 113.7(6)  |
| O(5)  | S(1)  | C(15) | 102.0(5)  | O(6)  | S(1)  | N(8)  | 105.8(6)  |
| O(6)  | S(1)  | C(15) | 113.2(5)  | N(8)  | S(1)  | C(15) | 104.6(5)  |
| O(3)  | S(2)  | O(4)  | 116.3(6)  | O(3)  | S(2)  | N(9)  | 110.6(6)  |
| O(3)  | S(2)  | C(1)  | 116.9(6)  | O(4)  | S(2)  | N(9)  | 106.8(6)  |
| O(4)  | S(2)  | C(1)  | 110.4(5)  | N(9)  | S(2)  | C(1)  | 93.1(5)   |
| N(13) | N(1)  | C(36) | 104.2(10) | N(9)  | N(7)  | C(31) | 117.2(7)  |
| S(1)  | N(8)  | N(10) | 116.6(8)  | S(1)  | N(8)  | C(34) | 120.5(8)  |
| N(10) | N(8)  | C(34) | 111.6(10) | S(2)  | N(9)  | N(7)  | 117.1(8)  |
| S(2)  | N(9)  | C(20) | 110.1(7)  | N(7)  | N(9)  | C(20) | 112.1(9)  |
| N(8)  | N(10) | C(19) | 117.2(8)  | N(14) | N(11) | C(24) | 128.2(10) |
| N(1)  | N(13) | C(22) | 115.2(7)  | N(1)  | N(13) | H(1)  | 127.7     |
| C(22) | N(13) | H(1)  | 117.1     | N(11) | N(14) | C(26) | 126.9(8)  |
| N(11) | N(14) | H(2)  | 115.8     | C(26) | N(14) | H(2)  | 117.2     |
| S(2)  | C(1)  | C(18) | 115.0(7)  | S(2)  | C(1)  | C(26) | 119.9(6)  |
| C(18) | C(1)  | C(26) | 124.5(8)  | S(1)  | C(15) | C(17) | 120.7(8)  |
| S(1)  | C(15) | C(22) | 121.1(8)  | C(17) | C(15) | C(22) | 118.0(10) |
| C(15) | C(17) | C(19) | 110.7(9)  | C(15) | C(17) | C(25) | 136.2(10) |
| C(19) | C(17) | C(25) | 111.9(9)  | C(1)  | C(18) | C(23) | 104.8(8)  |
| C(1)  | C(18) | C(31) | 126.7(8)  | C(23) | C(18) | C(31) | 127.8(8)  |
| N(10) | C(19) | C(17) | 133.7(8)  | N(10) | C(19) | C(32) | 106.4(6)  |
| C(17) | C(19) | C(32) | 119.3(7)  | N(9)  | C(20) | H(13) | 103.7     |
| N(9)  | C(20) | H(14) | 110.2     | N(9)  | C(20) | H(15) | 114.3     |
| H(13) | C(20) | H(14) | 109.5     | H(13) | C(20) | H(15) | 109.5     |
| H(14) | C(20) | H(15) | 109.5     | C(25) | C(21) | C(33) | 111.7(8)  |
| C(25) | C(21) | H(3)  | 127.2     | C(33) | C(21) | H(3)  | 121.1     |
| N(13) | C(22) | C(15) | 126.0(9)  | N(13) | C(22) | C(33) | 118.2(8)  |
| C(15) | C(22) | C(33) | 115.3(8)  | C(18) | C(23) | C(28) | 125.0(10) |
| C(18) | C(23) | H(4)  | 110.9     | C(28) | C(23) | H(4)  | 124.1     |
| N(11) | C(24) | C(30) | 120.5(12) | N(11) | C(24) | C(40) | 116.6(13) |
| C(30) | C(24) | C(40) | 119.8(12) | C(17) | C(25) | C(21) | 110.4(8)  |
| C(17) | C(25) | H(5)  | 128.7     | C(21) | C(25) | H(5)  | 120.9     |
| N(14) | C(26) | C(1)  | 119.1(6)  | N(14) | C(26) | C(27) | 120.4(8)  |
| C(1)  | C(26) | C(27) | 120.2(7)  | C(26) | C(27) | C(28) | 109.3(9)  |
| C(26) | C(27) | H(6)  | 122.4     | C(28) | C(27) | H(6)  | 126.5     |
| C(23) | C(28) | C(27) | 133.0(11) | C(23) | C(28) | H(7)  | 109.1     |
| C(27) | C(28) | H(7)  | 117.6     | C(31) | C(29) | H(16) | 106.5     |

Table 4. Bond angles ( $^{\circ}$ ) (continued)

| atom  | atom  | atom  | angle     | atom  | atom  | atom  | angle     |
|-------|-------|-------|-----------|-------|-------|-------|-----------|
| C(31) | C(29) | H(17) | 110.8     | C(31) | C(29) | H(18) | 111.0     |
| H(16) | C(29) | H(17) | 109.5     | H(16) | C(29) | H(18) | 109.5     |
| H(17) | C(29) | H(18) | 109.5     | C(24) | C(30) | H(19) | 105.7     |
| C(24) | C(30) | H(20) | 112.0     | C(24) | C(30) | H(21) | 110.6     |
| H(19) | C(30) | H(20) | 109.5     | H(19) | C(30) | H(21) | 109.5     |
| H(20) | C(30) | H(21) | 109.5     | N(7)  | C(31) | C(18) | 119.5(6)  |
| N(7)  | C(31) | C(29) | 121.4(7)  | C(18) | C(31) | C(29) | 117.5(6)  |
| C(19) | C(32) | H(22) | 109.7     | C(19) | C(32) | H(23) | 110.3     |
| C(19) | C(32) | H(24) | 108.4     | H(22) | C(32) | H(23) | 109.5     |
| H(22) | C(32) | H(24) | 109.5     | H(23) | C(32) | H(24) | 109.5     |
| C(21) | C(33) | C(22) | 126.1(8)  | C(21) | C(33) | H(8)  | 115.8     |
| C(22) | C(33) | H(8)  | 117.7     | N(8)  | C(34) | H(25) | 104.2     |
| N(8)  | C(34) | H(26) | 113.8     | N(8)  | C(34) | H(27) | 110.2     |
| H(25) | C(34) | H(26) | 109.5     | H(25) | C(34) | H(27) | 109.5     |
| H(26) | C(34) | H(27) | 109.5     | C(36) | C(35) | C(37) | 110.4(10) |
| C(36) | C(35) | H(9)  | 108.9     | C(36) | C(35) | H(10) | 109.6     |
| C(37) | C(35) | H(9)  | 109.7     | C(37) | C(35) | H(10) | 108.8     |
| H(9)  | C(35) | H(10) | 109.5     | N(1)  | C(36) | C(35) | 113.9(11) |
| N(1)  | C(36) | C(38) | 134.7(12) | C(35) | C(36) | C(38) | 110.7(10) |
| C(35) | C(37) | H(28) | 109.9     | C(35) | C(37) | H(29) | 113.0     |
| C(35) | C(37) | H(30) | 105.4     | H(28) | C(37) | H(29) | 109.5     |
| H(28) | C(37) | H(30) | 109.5     | H(29) | C(37) | H(30) | 109.5     |
| C(36) | C(38) | H(31) | 104.4     | C(36) | C(38) | H(32) | 116.5     |
| C(36) | C(38) | H(33) | 107.3     | H(31) | C(38) | H(32) | 109.5     |
| H(31) | C(38) | H(33) | 109.5     | H(32) | C(38) | H(33) | 109.5     |
| C(40) | C(39) | H(34) | 106.1     | C(40) | C(39) | H(35) | 109.6     |
| C(40) | C(39) | H(36) | 112.6     | H(34) | C(39) | H(35) | 109.5     |
| H(34) | C(39) | H(36) | 109.5     | H(35) | C(39) | H(36) | 109.5     |
| C(24) | C(40) | C(39) | 122.3(10) | C(24) | C(40) | H(11) | 104.0     |
| C(24) | C(40) | H(12) | 111.9     | C(39) | C(40) | H(11) | 101.2     |
| C(39) | C(40) | H(12) | 106.9     | H(11) | C(40) | H(12) | 109.5     |

Table 5. Torsion Angles( $^{\circ}$ )

| atom1 | atom2 | atom3 | atom4 | angle     | atom1 | atom2 | atom3 | atom4 | angle      |
|-------|-------|-------|-------|-----------|-------|-------|-------|-------|------------|
| O(5)  | S(1)  | N(8)  | N(10) | 64.9(10)  | O(5)  | S(1)  | N(8)  | C(34) | -75.7(11)  |
| O(5)  | S(1)  | C(15) | C(17) | -81.3(9)  | O(5)  | S(1)  | C(15) | C(22) | 94.9(10)   |
| O(6)  | S(1)  | N(8)  | N(10) | -165.3(8) | O(6)  | S(1)  | N(8)  | C(34) | 54.1(11)   |
| O(6)  | S(1)  | C(15) | C(17) | 152.1(9)  | O(6)  | S(1)  | C(15) | C(22) | -31.7(12)  |
| N(8)  | S(1)  | C(15) | C(17) | 37.4(10)  | N(8)  | S(1)  | C(15) | C(22) | -146.4(10) |
| C(15) | S(1)  | N(8)  | N(10) | -45.5(10) | C(15) | S(1)  | N(8)  | C(34) | 173.9(9)   |
| O(3)  | S(2)  | N(9)  | N(7)  | -58.2(10) | O(3)  | S(2)  | N(9)  | C(20) | 71.4(10)   |
| O(3)  | S(2)  | C(1)  | C(18) | 79.4(9)   | O(3)  | S(2)  | C(1)  | C(26) | -92.0(8)   |
| O(4)  | S(2)  | N(9)  | N(7)  | 174.5(8)  | O(4)  | S(2)  | N(9)  | C(20) | -55.9(9)   |
| O(4)  | S(2)  | C(1)  | C(18) | -144.7(8) | O(4)  | S(2)  | C(1)  | C(26) | 43.9(9)    |
| N(9)  | S(2)  | C(1)  | C(18) | -35.6(8)  | N(9)  | S(2)  | C(1)  | C(26) | 153.0(8)   |
| C(1)  | S(2)  | N(9)  | N(7)  | 62.1(8)   | C(1)  | S(2)  | N(9)  | C(20) | -168.3(8)  |
| N(13) | N(1)  | C(36) | C(35) | 174.0(9)  | N(13) | N(1)  | C(36) | C(38) | 5.3(19)    |
| C(36) | N(1)  | N(13) | C(22) | 176.3(9)  | N(9)  | N(7)  | C(31) | C(18) | 6.4(11)    |
| N(9)  | N(7)  | C(31) | C(29) | -158.7(8) | C(31) | N(7)  | N(9)  | S(2)  | -52.8(11)  |
| C(31) | N(7)  | N(9)  | C(20) | 178.5(8)  | S(1)  | N(8)  | N(10) | C(19) | 32.2(12)   |
| C(34) | N(8)  | N(10) | C(19) | 176.2(9)  | N(8)  | N(10) | C(19) | C(17) | -2.4(15)   |
| N(8)  | N(10) | C(19) | C(32) | -172.6(8) | N(14) | N(11) | C(24) | C(30) | 15(2)      |
| N(14) | N(11) | C(24) | C(40) | 175.2(10) | C(24) | N(11) | N(14) | C(26) | 174.9(11)  |
| N(1)  | N(13) | C(22) | C(15) | -179.8(8) | N(1)  | N(13) | C(22) | C(33) | -8.0(12)   |
| N(11) | N(14) | C(26) | C(1)  | -176.9(9) | N(11) | N(14) | C(26) | C(27) | -2.8(16)   |
| S(2)  | C(1)  | C(18) | C(23) | -168.1(7) | S(2)  | C(1)  | C(18) | C(31) | 3.1(12)    |
| S(2)  | C(1)  | C(26) | N(14) | -8.7(11)  | S(2)  | C(1)  | C(26) | C(27) | 177.2(8)   |
| C(18) | C(1)  | C(26) | N(14) | -179.2(9) | C(18) | C(1)  | C(26) | C(27) | 6.7(14)    |
| C(26) | C(1)  | C(18) | C(23) | 2.8(12)   | C(26) | C(1)  | C(18) | C(31) | 174.0(7)   |
| S(1)  | C(15) | C(17) | C(19) | -14.3(12) | S(1)  | C(15) | C(17) | C(25) | 179.8(8)   |
| S(1)  | C(15) | C(22) | N(13) | -0.7(14)  | S(1)  | C(15) | C(22) | C(33) | -172.6(7)  |
| C(17) | C(15) | C(22) | N(13) | 175.6(9)  | C(17) | C(15) | C(22) | C(33) | 3.6(14)    |
| C(22) | C(15) | C(17) | C(19) | 169.4(9)  | C(22) | C(15) | C(17) | C(25) | 3.5(19)    |
| C(15) | C(17) | C(19) | N(10) | -6.6(15)  | C(15) | C(17) | C(19) | C(32) | 162.6(8)   |
| C(15) | C(17) | C(25) | C(21) | 0.1(15)   | C(19) | C(17) | C(25) | C(21) | -165.6(8)  |
| C(25) | C(17) | C(19) | N(10) | 162.9(10) | C(25) | C(17) | C(19) | C(32) | -27.9(11)  |
| C(1)  | C(18) | C(23) | C(28) | -0.1(12)  | C(1)  | C(18) | C(31) | N(7)  | 18.7(13)   |
| C(1)  | C(18) | C(31) | C(29) | -175.6(9) | C(23) | C(18) | C(31) | N(7)  | -172.1(9)  |
| C(23) | C(18) | C(31) | C(29) | -6.3(13)  | C(31) | C(18) | C(23) | C(28) | -171.2(10) |
| C(25) | C(21) | C(33) | C(22) | 18.5(14)  | C(33) | C(21) | C(25) | C(17) | -10.1(13)  |
| N(13) | C(22) | C(33) | C(21) | 171.7(9)  | C(15) | C(22) | C(33) | C(21) | -15.7(14)  |

Table 5. Torsion angles ( $^{\circ}$ ) (continued)

| atom1 | atom2 | atom3 | atom4 | angle     | atom1 | atom2 | atom3 | atom4 | angle     |
|-------|-------|-------|-------|-----------|-------|-------|-------|-------|-----------|
| C(18) | C(23) | C(28) | C(27) | -14(2)    | N(11) | C(24) | C(40) | C(39) | 4.2(18)   |
| C(30) | C(24) | C(40) | C(39) | 164.3(11) | N(14) | C(26) | C(27) | C(28) | 169.5(9)  |
| C(1)  | C(26) | C(27) | C(28) | -16.4(13) | C(26) | C(27) | C(28) | C(23) | 23(2)     |
| C(37) | C(35) | C(36) | N(1)  | 0.5(13)   | C(37) | C(35) | C(36) | C(38) | 172.0(10) |

The sign is positive if when looking from atom 2 to atom 3 a clock-wise motion of atom 1 would superimpose it on atom 4.

Table 6. Distances beyond the asymmetric unit out to 3.60 Å

| atom  | atom                 | distance  | atom  | atom                 | distance  |
|-------|----------------------|-----------|-------|----------------------|-----------|
| S(1)  | H(6) <sup>1)</sup>   | 3.509     | S(1)  | H(36) <sup>1)</sup>  | 3.592     |
| O(3)  | C(38) <sup>2)</sup>  | 3.455(18) | O(3)  | H(3) <sup>3)</sup>   | 3.384     |
| O(3)  | H(8) <sup>3)</sup>   | 2.897     | O(3)  | H(28) <sup>3)</sup>  | 3.497     |
| O(3)  | H(29) <sup>4)</sup>  | 3.151     | O(3)  | H(30) <sup>3)</sup>  | 3.213     |
| O(3)  | H(32) <sup>2)</sup>  | 2.677     | O(3)  | H(33) <sup>2)</sup>  | 3.449     |
| O(4)  | H(4) <sup>5)</sup>   | 3.052     | O(4)  | H(7) <sup>5)</sup>   | 3.223     |
| O(4)  | H(14) <sup>3)</sup>  | 3.034     | O(4)  | H(24) <sup>6)</sup>  | 3.366     |
| O(4)  | H(28) <sup>3)</sup>  | 3.135     | O(5)  | C(27) <sup>1)</sup>  | 3.325(16) |
| O(5)  | C(30) <sup>6)</sup>  | 3.359(15) | O(5)  | H(6) <sup>1)</sup>   | 2.483     |
| O(5)  | H(7) <sup>1)</sup>   | 3.593     | O(5)  | H(19) <sup>6)</sup>  | 2.739     |
| O(5)  | H(20) <sup>6)</sup>  | 3.149     | O(5)  | H(34) <sup>7)</sup>  | 3.220     |
| O(5)  | H(35) <sup>7)</sup>  | 3.391     | O(5)  | H(36) <sup>1)</sup>  | 2.857     |
| O(6)  | C(21) <sup>8)</sup>  | 3.423(11) | O(6)  | C(25) <sup>8)</sup>  | 3.363(13) |
| O(6)  | C(34) <sup>1)</sup>  | 3.483(16) | O(6)  | H(3) <sup>8)</sup>   | 3.010     |
| O(6)  | H(5) <sup>8)</sup>   | 2.741     | O(6)  | H(25) <sup>1)</sup>  | 2.662     |
| O(6)  | H(26) <sup>1)</sup>  | 3.505     | O(6)  | H(36) <sup>1)</sup>  | 3.297     |
| N(1)  | H(12) <sup>7)</sup>  | 3.285     | N(1)  | H(16) <sup>2)</sup>  | 3.101     |
| N(1)  | H(34) <sup>7)</sup>  | 3.370     | N(7)  | C(23) <sup>2)</sup>  | 3.575(14) |
| N(7)  | C(34) <sup>9)</sup>  | 3.529(14) | N(7)  | H(3) <sup>3)</sup>   | 3.045     |
| N(7)  | H(4) <sup>2)</sup>   | 3.577     | N(7)  | H(26) <sup>9)</sup>  | 2.612     |
| N(8)  | C(25) <sup>6)</sup>  | 3.502(16) | N(8)  | H(5) <sup>6)</sup>   | 3.202     |
| N(8)  | H(22) <sup>6)</sup>  | 3.423     | N(8)  | H(25) <sup>1)</sup>  | 3.290     |
| N(9)  | C(23) <sup>2)</sup>  | 3.562(16) | N(9)  | H(4) <sup>2)</sup>   | 3.183     |
| N(9)  | H(17) <sup>2)</sup>  | 3.190     | N(10) | C(25) <sup>6)</sup>  | 3.318(14) |
| N(10) | H(5) <sup>6)</sup>   | 3.399     | N(10) | H(13) <sup>10)</sup> | 3.157     |
| N(10) | H(14) <sup>10)</sup> | 3.452     | N(11) | C(32) <sup>6)</sup>  | 3.576(12) |
| N(11) | C(36) <sup>4)</sup>  | 3.600(15) | N(11) | H(9) <sup>4)</sup>   | 3.215     |
| N(11) | H(23) <sup>6)</sup>  | 2.815     | N(11) | H(24) <sup>6)</sup>  | 3.588     |
| N(13) | C(39) <sup>7)</sup>  | 3.584(12) | N(13) | H(12) <sup>7)</sup>  | 3.101     |
| N(13) | H(16) <sup>2)</sup>  | 2.892     | N(13) | H(34) <sup>7)</sup>  | 2.750     |
| N(14) | C(32) <sup>6)</sup>  | 3.565(13) | N(14) | H(9) <sup>4)</sup>   | 2.912     |
| N(14) | H(23) <sup>6)</sup>  | 2.944     | N(14) | H(24) <sup>6)</sup>  | 3.312     |
| C(1)  | H(10) <sup>2)</sup>  | 3.332     | C(1)  | H(18) <sup>2)</sup>  | 3.222     |
| C(15) | H(11) <sup>6)</sup>  | 3.356     | C(15) | H(22) <sup>6)</sup>  | 3.307     |
| C(17) | H(11) <sup>6)</sup>  | 2.976     | C(18) | H(10) <sup>2)</sup>  | 3.305     |
| C(18) | H(18) <sup>2)</sup>  | 3.476     | C(19) | C(19) <sup>6)</sup>  | 3.537(12) |
| C(19) | H(19) <sup>6)</sup>  | 3.460     | C(20) | H(3) <sup>3)</sup>   | 3.591     |

Table 6. Distances beyond the asymmetric unit out to 3.60 Å (continued)

| atom  | atom                 | distance  | atom  | atom                 | distance  |
|-------|----------------------|-----------|-------|----------------------|-----------|
| C(20) | H(4) <sup>2j</sup>   | 3.313     | C(20) | H(17) <sup>5j</sup>  | 3.234     |
| C(20) | H(24) <sup>9j</sup>  | 3.188     | C(20) | H(26) <sup>9j</sup>  | 3.537     |
| C(21) | O(6) <sup>5j</sup>   | 3.423(11) | C(21) | H(11) <sup>6j</sup>  | 3.326     |
| C(21) | H(13) <sup>3j</sup>  | 2.907     | C(21) | H(26) <sup>6j</sup>  | 3.384     |
| C(21) | H(33) <sup>5j</sup>  | 3.122     | C(21) | H(35) <sup>6j</sup>  | 3.404     |
| C(22) | H(11) <sup>6j</sup>  | 3.555     | C(22) | H(12) <sup>7j</sup>  | 3.080     |
| C(22) | H(16) <sup>2j</sup>  | 3.383     | C(22) | H(22) <sup>6j</sup>  | 3.566     |
| C(22) | H(34) <sup>7j</sup>  | 3.374     | C(23) | N(7) <sup>2j</sup>   | 3.575(14) |
| C(23) | N(9) <sup>2j</sup>   | 3.562(16) | C(23) | H(10) <sup>2j</sup>  | 3.234     |
| C(23) | H(14) <sup>2j</sup>  | 3.180     | C(23) | H(28) <sup>2j</sup>  | 2.894     |
| C(24) | H(23) <sup>6j</sup>  | 3.156     | C(25) | O(6) <sup>5j</sup>   | 3.363(13) |
| C(25) | N(8) <sup>6j</sup>   | 3.502(16) | C(25) | N(10) <sup>6j</sup>  | 3.318(14) |
| C(25) | H(11) <sup>6j</sup>  | 3.009     | C(25) | H(25) <sup>6j</sup>  | 3.377     |
| C(25) | H(26) <sup>6j</sup>  | 3.546     | C(26) | H(9) <sup>4j</sup>   | 2.924     |
| C(26) | H(10) <sup>2j</sup>  | 3.536     | C(26) | H(18) <sup>2j</sup>  | 3.446     |
| C(26) | H(23) <sup>6j</sup>  | 3.409     | C(26) | H(27) <sup>1j</sup>  | 3.541     |
| C(27) | O(5) <sup>1j</sup>   | 3.325(16) | C(27) | H(9) <sup>4j</sup>   | 3.286     |
| C(27) | H(27) <sup>1j</sup>  | 2.903     | C(28) | H(10) <sup>2j</sup>  | 3.317     |
| C(28) | H(14) <sup>2j</sup>  | 3.455     | C(28) | H(19) <sup>8j</sup>  | 3.484     |
| C(28) | H(27) <sup>1j</sup>  | 3.554     | C(28) | H(28) <sup>2j</sup>  | 2.928     |
| C(29) | H(15) <sup>8j</sup>  | 3.156     | C(29) | H(22) <sup>11j</sup> | 3.279     |
| C(29) | H(24) <sup>11j</sup> | 3.403     | C(29) | H(26) <sup>9j</sup>  | 3.415     |
| C(30) | O(5) <sup>6j</sup>   | 3.359(15) | C(30) | H(7) <sup>5j</sup>   | 3.334     |
| C(30) | H(30) <sup>4j</sup>  | 3.441     | C(31) | H(26) <sup>9j</sup>  | 3.399     |
| C(31) | H(33) <sup>2j</sup>  | 3.577     | C(32) | N(11) <sup>6j</sup>  | 3.576(12) |
| C(32) | N(14) <sup>6j</sup>  | 3.565(13) | C(32) | H(14) <sup>10j</sup> | 3.566     |
| C(32) | H(18) <sup>12j</sup> | 3.096     | C(32) | H(27) <sup>5j</sup>  | 3.257     |
| C(33) | H(11) <sup>6j</sup>  | 3.327     | C(33) | H(12) <sup>7j</sup>  | 3.079     |
| C(33) | H(13) <sup>3j</sup>  | 3.045     | C(33) | H(20) <sup>7j</sup>  | 3.581     |
| C(34) | O(6) <sup>1j</sup>   | 3.483(16) | C(34) | N(7) <sup>10j</sup>  | 3.529(14) |
| C(34) | H(5) <sup>8j</sup>   | 3.529     | C(34) | H(5) <sup>6j</sup>   | 3.300     |
| C(34) | H(6) <sup>1j</sup>   | 3.435     | C(34) | H(18) <sup>10j</sup> | 3.354     |
| C(34) | H(22) <sup>8j</sup>  | 3.482     | C(34) | H(23) <sup>8j</sup>  | 3.387     |
| C(34) | H(25) <sup>1j</sup>  | 3.115     | C(35) | C(35) <sup>13j</sup> | 3.517(19) |
| C(35) | H(9) <sup>13j</sup>  | 3.153     | C(35) | H(10) <sup>13j</sup> | 3.024     |
| C(36) | N(11) <sup>7j</sup>  | 3.600(15) | C(36) | H(16) <sup>2j</sup>  | 3.440     |
| C(36) | H(34) <sup>7j</sup>  | 3.402     | C(37) | H(7) <sup>2j</sup>   | 3.543     |

Table 6. Distances beyond the asymmetric unit out to 3.60 Å (continued)

| atom  | atom                 | distance  | atom  | atom                 | distance  |
|-------|----------------------|-----------|-------|----------------------|-----------|
| C(37) | H(21) <sup>7)</sup>  | 3.439     | C(38) | O(3) <sup>2)</sup>   | 3.455(18) |
| C(38) | H(3) <sup>8)</sup>   | 3.165     | C(38) | H(34) <sup>7)</sup>  | 3.366     |
| C(39) | N(13) <sup>4)</sup>  | 3.584(12) | C(39) | H(1) <sup>4)</sup>   | 3.554     |
| C(39) | H(31) <sup>4)</sup>  | 3.357     | C(39) | H(34) <sup>14)</sup> | 3.536     |
| C(40) | H(11) <sup>15)</sup> | 3.442     | C(40) | H(12) <sup>15)</sup> | 3.327     |
| H(1)  | C(39) <sup>7)</sup>  | 3.554     | H(1)  | H(3) <sup>8)</sup>   | 3.387     |
| H(1)  | H(12) <sup>7)</sup>  | 3.578     | H(1)  | H(16) <sup>2)</sup>  | 3.032     |
| H(1)  | H(34) <sup>7)</sup>  | 2.622     | H(2)  | H(9) <sup>4)</sup>   | 3.170     |
| H(2)  | H(23) <sup>6)</sup>  | 3.296     | H(2)  | H(24) <sup>6)</sup>  | 3.249     |
| H(2)  | H(29) <sup>4)</sup>  | 3.375     | H(2)  | H(30) <sup>4)</sup>  | 3.454     |
| H(3)  | O(3) <sup>3)</sup>   | 3.384     | H(3)  | O(6) <sup>5)</sup>   | 3.010     |
| H(3)  | N(7) <sup>3)</sup>   | 3.045     | H(3)  | C(20) <sup>3)</sup>  | 3.591     |
| H(3)  | C(38) <sup>5)</sup>  | 3.165     | H(3)  | H(1) <sup>5)</sup>   | 3.387     |
| H(3)  | H(13) <sup>3)</sup>  | 2.767     | H(3)  | H(25) <sup>6)</sup>  | 3.444     |
| H(3)  | H(26) <sup>6)</sup>  | 2.985     | H(3)  | H(31) <sup>5)</sup>  | 3.575     |
| H(3)  | H(32) <sup>5)</sup>  | 3.218     | H(3)  | H(33) <sup>5)</sup>  | 2.367     |
| H(3)  | H(35) <sup>6)</sup>  | 3.561     | H(4)  | O(4) <sup>8)</sup>   | 3.052     |
| H(4)  | N(7) <sup>2)</sup>   | 3.577     | H(4)  | N(9) <sup>2)</sup>   | 3.183     |
| H(4)  | C(20) <sup>2)</sup>  | 3.313     | H(4)  | H(14) <sup>2)</sup>  | 2.653     |
| H(4)  | H(15) <sup>8)</sup>  | 2.864     | H(4)  | H(28) <sup>2)</sup>  | 2.827     |
| H(5)  | O(6) <sup>5)</sup>   | 2.741     | H(5)  | N(8) <sup>6)</sup>   | 3.202     |
| H(5)  | N(10) <sup>6)</sup>  | 3.399     | H(5)  | C(34) <sup>5)</sup>  | 3.529     |
| H(5)  | C(34) <sup>6)</sup>  | 3.300     | H(5)  | H(11) <sup>6)</sup>  | 3.366     |
| H(5)  | H(25) <sup>5)</sup>  | 3.201     | H(5)  | H(25) <sup>6)</sup>  | 2.803     |
| H(5)  | H(26) <sup>6)</sup>  | 3.371     | H(5)  | H(27) <sup>5)</sup>  | 3.018     |
| H(5)  | H(36) <sup>6)</sup>  | 3.455     | H(6)  | S(1) <sup>1)</sup>   | 3.509     |
| H(6)  | O(5) <sup>1)</sup>   | 2.483     | H(6)  | C(34) <sup>1)</sup>  | 3.435     |
| H(6)  | H(9) <sup>4)</sup>   | 3.449     | H(6)  | H(19) <sup>8)</sup>  | 3.467     |
| H(6)  | H(23) <sup>6)</sup>  | 3.581     | H(6)  | H(27) <sup>1)</sup>  | 2.691     |
| H(6)  | H(31) <sup>4)</sup>  | 3.273     | H(7)  | O(4) <sup>8)</sup>   | 3.223     |
| H(7)  | O(5) <sup>1)</sup>   | 3.593     | H(7)  | C(30) <sup>8)</sup>  | 3.334     |
| H(7)  | C(37) <sup>2)</sup>  | 3.543     | H(7)  | H(14) <sup>2)</sup>  | 3.125     |
| H(7)  | H(19) <sup>8)</sup>  | 2.643     | H(7)  | H(21) <sup>8)</sup>  | 3.239     |
| H(7)  | H(28) <sup>2)</sup>  | 2.686     | H(8)  | O(3) <sup>3)</sup>   | 2.897     |
| H(8)  | H(12) <sup>7)</sup>  | 3.000     | H(8)  | H(13) <sup>3)</sup>  | 3.145     |
| H(8)  | H(20) <sup>7)</sup>  | 2.992     | H(8)  | H(32) <sup>5)</sup>  | 3.443     |
| H(9)  | N(11) <sup>7)</sup>  | 3.215     | H(9)  | N(14) <sup>7)</sup>  | 2.912     |

Table 6. Distances beyond the asymmetric unit out to 3.60 Å (continued)

| atom  | atom                 | distance | atom  | atom                 | distance |
|-------|----------------------|----------|-------|----------------------|----------|
| H(9)  | C(26) <sup>7j</sup>  | 2.924    | H(9)  | C(27) <sup>7j</sup>  | 3.286    |
| H(9)  | C(35) <sup>13j</sup> | 3.153    | H(9)  | H(2) <sup>7j</sup>   | 3.170    |
| H(9)  | H(6) <sup>7j</sup>   | 3.449    | H(9)  | H(9) <sup>13j</sup>  | 3.053    |
| H(9)  | H(10) <sup>13j</sup> | 2.473    | H(10) | C(1) <sup>2j</sup>   | 3.332    |
| H(10) | C(18) <sup>2j</sup>  | 3.305    | H(10) | C(23) <sup>2j</sup>  | 3.234    |
| H(10) | C(26) <sup>2j</sup>  | 3.536    | H(10) | C(28) <sup>2j</sup>  | 3.317    |
| H(10) | C(35) <sup>13j</sup> | 3.024    | H(10) | H(9) <sup>13j</sup>  | 2.473    |
| H(10) | H(10) <sup>13j</sup> | 2.779    | H(10) | H(29) <sup>13j</sup> | 3.476    |
| H(11) | C(15) <sup>6j</sup>  | 3.356    | H(11) | C(17) <sup>6j</sup>  | 2.976    |
| H(11) | C(21) <sup>6j</sup>  | 3.326    | H(11) | C(22) <sup>6j</sup>  | 3.555    |
| H(11) | C(25) <sup>6j</sup>  | 3.009    | H(11) | C(33) <sup>6j</sup>  | 3.327    |
| H(11) | C(40) <sup>15j</sup> | 3.442    | H(11) | H(5) <sup>6j</sup>   | 3.366    |
| H(11) | H(11) <sup>15j</sup> | 3.288    | H(11) | H(12) <sup>15j</sup> | 2.762    |
| H(12) | N(1) <sup>4j</sup>   | 3.285    | H(12) | N(13) <sup>4j</sup>  | 3.101    |
| H(12) | C(22) <sup>4j</sup>  | 3.080    | H(12) | C(33) <sup>4j</sup>  | 3.079    |
| H(12) | C(40) <sup>15j</sup> | 3.327    | H(12) | H(1) <sup>4j</sup>   | 3.578    |
| H(12) | H(8) <sup>4j</sup>   | 3.000    | H(12) | H(11) <sup>15j</sup> | 2.762    |
| H(12) | H(12) <sup>15j</sup> | 3.042    | H(12) | H(35) <sup>15j</sup> | 3.517    |
| H(13) | N(10) <sup>9j</sup>  | 3.157    | H(13) | C(21) <sup>3j</sup>  | 2.907    |
| H(13) | C(33) <sup>3j</sup>  | 3.045    | H(13) | H(3) <sup>3j</sup>   | 2.767    |
| H(13) | H(8) <sup>3j</sup>   | 3.145    | H(13) | H(17) <sup>5j</sup>  | 3.566    |
| H(13) | H(22) <sup>9j</sup>  | 3.571    | H(13) | H(24) <sup>9j</sup>  | 3.039    |
| H(13) | H(26) <sup>9j</sup>  | 3.001    | H(14) | O(4) <sup>3j</sup>   | 3.034    |
| H(14) | N(10) <sup>9j</sup>  | 3.452    | H(14) | C(23) <sup>2j</sup>  | 3.180    |
| H(14) | C(28) <sup>2j</sup>  | 3.455    | H(14) | C(32) <sup>9j</sup>  | 3.566    |
| H(14) | H(4) <sup>2j</sup>   | 2.653    | H(14) | H(7) <sup>2j</sup>   | 3.125    |
| H(14) | H(15) <sup>3j</sup>  | 3.371    | H(14) | H(17) <sup>5j</sup>  | 3.352    |
| H(14) | H(17) <sup>2j</sup>  | 3.548    | H(14) | H(24) <sup>9j</sup>  | 2.701    |
| H(14) | H(26) <sup>9j</sup>  | 3.473    | H(15) | C(29) <sup>5j</sup>  | 3.156    |
| H(15) | H(4) <sup>5j</sup>   | 2.864    | H(15) | H(14) <sup>3j</sup>  | 3.371    |
| H(15) | H(15) <sup>3j</sup>  | 3.566    | H(15) | H(16) <sup>5j</sup>  | 3.149    |
| H(15) | H(17) <sup>5j</sup>  | 2.420    | H(15) | H(18) <sup>5j</sup>  | 3.517    |
| H(15) | H(24) <sup>9j</sup>  | 3.326    | H(16) | N(1) <sup>2j</sup>   | 3.101    |
| H(16) | N(13) <sup>2j</sup>  | 2.892    | H(16) | C(22) <sup>2j</sup>  | 3.383    |
| H(16) | C(36) <sup>2j</sup>  | 3.440    | H(16) | H(1) <sup>2j</sup>   | 3.032    |
| H(16) | H(15) <sup>8j</sup>  | 3.149    | H(16) | H(22) <sup>11j</sup> | 2.983    |
| H(16) | H(24) <sup>11j</sup> | 3.443    | H(16) | H(26) <sup>9j</sup>  | 3.474    |



Table 6. Distances beyond the asymmetric unit out to 3.60 Å (continued)

| atom  | atom                 | distance | atom  | atom                 | distance |
|-------|----------------------|----------|-------|----------------------|----------|
| H(16) | H(33) <sup>2)</sup>  | 3.277    | H(17) | N(9) <sup>2)</sup>   | 3.190    |
| H(17) | C(20) <sup>8)</sup>  | 3.234    | H(17) | H(13) <sup>8)</sup>  | 3.566    |
| H(17) | H(14) <sup>8)</sup>  | 3.352    | H(17) | H(14) <sup>2)</sup>  | 3.548    |
| H(17) | H(15) <sup>8)</sup>  | 2.420    | H(17) | H(24) <sup>11)</sup> | 3.396    |
| H(18) | C(1) <sup>2)</sup>   | 3.222    | H(18) | C(18) <sup>2)</sup>  | 3.476    |
| H(18) | C(26) <sup>2)</sup>  | 3.446    | H(18) | C(32) <sup>11)</sup> | 3.096    |
| H(18) | C(34) <sup>9)</sup>  | 3.354    | H(18) | H(15) <sup>8)</sup>  | 3.517    |
| H(18) | H(22) <sup>11)</sup> | 2.781    | H(18) | H(23) <sup>11)</sup> | 3.147    |
| H(18) | H(24) <sup>11)</sup> | 2.850    | H(18) | H(25) <sup>9)</sup>  | 3.590    |
| H(18) | H(26) <sup>9)</sup>  | 2.888    | H(18) | H(27) <sup>9)</sup>  | 3.089    |
| H(19) | O(5) <sup>6)</sup>   | 2.739    | H(19) | C(19) <sup>6)</sup>  | 3.460    |
| H(19) | C(28) <sup>5)</sup>  | 3.484    | H(19) | H(6) <sup>5)</sup>   | 3.467    |
| H(19) | H(7) <sup>5)</sup>   | 2.643    | H(19) | H(23) <sup>6)</sup>  | 3.502    |
| H(19) | H(24) <sup>6)</sup>  | 3.371    | H(20) | O(5) <sup>6)</sup>   | 3.149    |
| H(20) | C(33) <sup>4)</sup>  | 3.581    | H(20) | H(8) <sup>4)</sup>   | 2.992    |
| H(20) | H(30) <sup>4)</sup>  | 3.568    | H(20) | H(31) <sup>16)</sup> | 3.272    |
| H(20) | H(32) <sup>16)</sup> | 3.280    | H(20) | H(35) <sup>15)</sup> | 3.359    |
| H(21) | C(37) <sup>4)</sup>  | 3.439    | H(21) | H(7) <sup>5)</sup>   | 3.239    |
| H(21) | H(28) <sup>3)</sup>  | 3.300    | H(21) | H(29) <sup>4)</sup>  | 3.382    |
| H(21) | H(29) <sup>3)</sup>  | 3.144    | H(21) | H(30) <sup>4)</sup>  | 2.733    |
| H(22) | N(8) <sup>6)</sup>   | 3.423    | H(22) | C(15) <sup>6)</sup>  | 3.307    |
| H(22) | C(22) <sup>6)</sup>  | 3.566    | H(22) | C(29) <sup>12)</sup> | 3.279    |
| H(22) | C(34) <sup>5)</sup>  | 3.482    | H(22) | H(13) <sup>10)</sup> | 3.571    |
| H(22) | H(16) <sup>12)</sup> | 2.983    | H(22) | H(18) <sup>12)</sup> | 2.781    |
| H(22) | H(25) <sup>5)</sup>  | 3.160    | H(22) | H(27) <sup>5)</sup>  | 3.055    |
| H(23) | N(11) <sup>6)</sup>  | 2.815    | H(23) | N(14) <sup>6)</sup>  | 2.944    |
| H(23) | C(24) <sup>6)</sup>  | 3.156    | H(23) | C(26) <sup>6)</sup>  | 3.409    |
| H(23) | C(34) <sup>5)</sup>  | 3.387    | H(23) | H(2) <sup>6)</sup>   | 3.296    |
| H(23) | H(6) <sup>6)</sup>   | 3.581    | H(23) | H(18) <sup>12)</sup> | 3.147    |
| H(23) | H(19) <sup>6)</sup>  | 3.502    | H(23) | H(25) <sup>5)</sup>  | 3.383    |
| H(23) | H(27) <sup>5)</sup>  | 2.614    | H(24) | O(4) <sup>6)</sup>   | 3.366    |
| H(24) | N(11) <sup>6)</sup>  | 3.588    | H(24) | N(14) <sup>6)</sup>  | 3.312    |
| H(24) | C(20) <sup>10)</sup> | 3.188    | H(24) | C(29) <sup>12)</sup> | 3.403    |
| H(24) | H(2) <sup>6)</sup>   | 3.249    | H(24) | H(13) <sup>10)</sup> | 3.039    |
| H(24) | H(14) <sup>10)</sup> | 2.701    | H(24) | H(15) <sup>10)</sup> | 3.326    |
| H(24) | H(16) <sup>12)</sup> | 3.443    | H(24) | H(17) <sup>12)</sup> | 3.396    |
| H(24) | H(18) <sup>12)</sup> | 2.850    | H(24) | H(19) <sup>6)</sup>  | 3.371    |

Table 6. Distances beyond the asymmetric unit out to 3.60 Å (continued)

| atom  | atom                 | distance | atom  | atom                 | distance |
|-------|----------------------|----------|-------|----------------------|----------|
| H(25) | O(6) <sup>11</sup>   | 2.662    | H(25) | N(8) <sup>11</sup>   | 3.290    |
| H(25) | C(25) <sup>61</sup>  | 3.377    | H(25) | C(34) <sup>11</sup>  | 3.115    |
| H(25) | H(3) <sup>61</sup>   | 3.444    | H(25) | H(5) <sup>81</sup>   | 3.201    |
| H(25) | H(5) <sup>61</sup>   | 2.803    | H(25) | H(18) <sup>101</sup> | 3.590    |
| H(25) | H(22) <sup>81</sup>  | 3.160    | H(25) | H(23) <sup>81</sup>  | 3.383    |
| H(25) | H(25) <sup>11</sup>  | 2.315    | H(25) | H(27) <sup>11</sup>  | 3.410    |
| H(26) | O(6) <sup>11</sup>   | 3.505    | H(26) | N(7) <sup>101</sup>  | 2.612    |
| H(26) | C(20) <sup>101</sup> | 3.537    | H(26) | C(21) <sup>61</sup>  | 3.384    |
| H(26) | C(25) <sup>61</sup>  | 3.546    | H(26) | C(29) <sup>101</sup> | 3.415    |
| H(26) | C(31) <sup>101</sup> | 3.399    | H(26) | H(3) <sup>61</sup>   | 2.985    |
| H(26) | H(5) <sup>61</sup>   | 3.371    | H(26) | H(13) <sup>101</sup> | 3.001    |
| H(26) | H(14) <sup>101</sup> | 3.473    | H(26) | H(16) <sup>101</sup> | 3.474    |
| H(26) | H(18) <sup>101</sup> | 2.888    | H(27) | C(26) <sup>11</sup>  | 3.541    |
| H(27) | C(27) <sup>11</sup>  | 2.903    | H(27) | C(28) <sup>11</sup>  | 3.554    |
| H(27) | C(32) <sup>81</sup>  | 3.257    | H(27) | H(5) <sup>81</sup>   | 3.018    |
| H(27) | H(6) <sup>11</sup>   | 2.691    | H(27) | H(18) <sup>101</sup> | 3.089    |
| H(27) | H(22) <sup>81</sup>  | 3.055    | H(27) | H(23) <sup>81</sup>  | 2.614    |
| H(27) | H(25) <sup>11</sup>  | 3.410    | H(28) | O(3) <sup>31</sup>   | 3.497    |
| H(28) | O(4) <sup>31</sup>   | 3.135    | H(28) | C(23) <sup>21</sup>  | 2.894    |
| H(28) | C(28) <sup>21</sup>  | 2.928    | H(28) | H(4) <sup>21</sup>   | 2.827    |
| H(28) | H(7) <sup>21</sup>   | 2.686    | H(28) | H(21) <sup>31</sup>  | 3.300    |
| H(29) | O(3) <sup>71</sup>   | 3.151    | H(29) | H(2) <sup>71</sup>   | 3.375    |
| H(29) | H(10) <sup>131</sup> | 3.476    | H(29) | H(21) <sup>71</sup>  | 3.382    |
| H(29) | H(21) <sup>31</sup>  | 3.144    | H(29) | H(29) <sup>171</sup> | 3.213    |
| H(29) | H(30) <sup>171</sup> | 3.306    | H(29) | H(32) <sup>131</sup> | 3.270    |
| H(30) | O(3) <sup>31</sup>   | 3.213    | H(30) | C(30) <sup>71</sup>  | 3.441    |
| H(30) | H(2) <sup>71</sup>   | 3.454    | H(30) | H(20) <sup>71</sup>  | 3.568    |
| H(30) | H(21) <sup>71</sup>  | 2.733    | H(30) | H(29) <sup>171</sup> | 3.306    |
| H(31) | C(39) <sup>71</sup>  | 3.357    | H(31) | H(3) <sup>81</sup>   | 3.575    |
| H(31) | H(6) <sup>71</sup>   | 3.273    | H(31) | H(20) <sup>181</sup> | 3.272    |
| H(31) | H(34) <sup>71</sup>  | 2.740    | H(31) | H(35) <sup>11</sup>  | 3.032    |
| H(31) | H(36) <sup>71</sup>  | 3.142    | H(32) | O(3) <sup>21</sup>   | 2.677    |
| H(32) | H(3) <sup>81</sup>   | 3.218    | H(32) | H(8) <sup>81</sup>   | 3.443    |
| H(32) | H(20) <sup>181</sup> | 3.280    | H(32) | H(29) <sup>131</sup> | 3.270    |
| H(33) | O(3) <sup>21</sup>   | 3.449    | H(33) | C(21) <sup>81</sup>  | 3.122    |
| H(33) | C(31) <sup>21</sup>  | 3.577    | H(33) | H(3) <sup>81</sup>   | 2.367    |
| H(33) | H(16) <sup>21</sup>  | 3.277    | H(33) | H(34) <sup>71</sup>  | 3.451    |

Table 6. Distances beyond the asymmetric unit out to 3.60 Å (continued)

| atom  | atom                  | distance | atom  | atom                  | distance |
|-------|-----------------------|----------|-------|-----------------------|----------|
| H(33) | H(35) <sup>(1)</sup>  | 3.370    | H(34) | O(5) <sup>(4)</sup>   | 3.220    |
| H(34) | N(1) <sup>(4)</sup>   | 3.370    | H(34) | N(13) <sup>(4)</sup>  | 2.750    |
| H(34) | C(22) <sup>(4)</sup>  | 3.374    | H(34) | C(36) <sup>(4)</sup>  | 3.402    |
| H(34) | C(38) <sup>(4)</sup>  | 3.366    | H(34) | C(39) <sup>(14)</sup> | 3.536    |
| H(34) | H(1) <sup>(4)</sup>   | 2.622    | H(34) | H(31) <sup>(4)</sup>  | 2.740    |
| H(34) | H(33) <sup>(4)</sup>  | 3.451    | H(34) | H(34) <sup>(14)</sup> | 3.365    |
| H(34) | H(35) <sup>(14)</sup> | 3.282    | H(34) | H(36) <sup>(14)</sup> | 3.380    |
| H(35) | O(5) <sup>(4)</sup>   | 3.391    | H(35) | C(21) <sup>(6)</sup>  | 3.404    |
| H(35) | H(3) <sup>(6)</sup>   | 3.561    | H(35) | H(12) <sup>(15)</sup> | 3.517    |
| H(35) | H(20) <sup>(15)</sup> | 3.359    | H(35) | H(31) <sup>(1)</sup>  | 3.032    |
| H(35) | H(33) <sup>(1)</sup>  | 3.370    | H(35) | H(34) <sup>(14)</sup> | 3.282    |
| H(36) | S(1) <sup>(1)</sup>   | 3.592    | H(36) | O(5) <sup>(1)</sup>   | 2.857    |
| H(36) | O(6) <sup>(1)</sup>   | 3.297    | H(36) | H(5) <sup>(6)</sup>   | 3.455    |
| H(36) | H(31) <sup>(4)</sup>  | 3.142    | H(36) | H(34) <sup>(14)</sup> | 3.380    |

Symmetry Operators:

- |                     |                  |
|---------------------|------------------|
| (1) -X,-Y+2,-Z      | (2) -X,-Y+2,-Z+1 |
| (3) -X+1,-Y+2,-Z+1  | (4) X,Y-1,Z      |
| (5) X+1,Y,Z         | (6) -X+1,-Y+2,-Z |
| (7) X,Y+1,Z         | (8) X-1,Y,Z      |
| (9) X,Y,Z+1         | (10) X,Y,Z-1     |
| (11) X-1,Y,Z+1      | (12) X+1,Y,Z-1   |
| (13) -X,-Y+3,-Z+1   | (14) -X,-Y+1,-Z  |
| (15) -X+1,-Y+1,-Z   | (16) X+1,Y-1,Z   |
| (17) -X+1,-Y+3,-Z+1 | (18) X-1,Y+1,Z   |

Table 7. Intramolecular and Intermolecular Hydrogen bonds

| D     | H    | A    | D...A     | D-H   | H...A | D-H...A |
|-------|------|------|-----------|-------|-------|---------|
| N(13) | H(1) | O(6) | 2.772(13) | 0.950 | 2.041 | 132.4   |
| N(14) | H(2) | O(4) | 2.912(13) | 0.950 | 2.174 | 133.6   |

Note) 1. The symmetry operations are applied to the acceptors.  
2. Estimated standard deviations (esd's) are shown in the parentheses.  
They are not calculated when all atoms have an esd=0.0.
