# Supplementary material for: Thiadiazino-indole, thiadiazino-carbazole and benzothiadiazino-carbazole dioxides: synthesis, physicochemical and early ADME characterization of representatives of new tri-, tetra- and pentacyclic ring systems and their intermediates
Source: publisher site journal article supplement (doi:10.3762/bjoc.21.169), 2025-10-21
Supplement: Additional file 2 [file 7b_xrd.pdf › Átnevezett XRD/7b_xrd.pdf]

**144200**

**PGY0807\_1**

Submitted by: Pusztai Gyongyver  
Operator: Dancso Andras

X-ray Structure Report

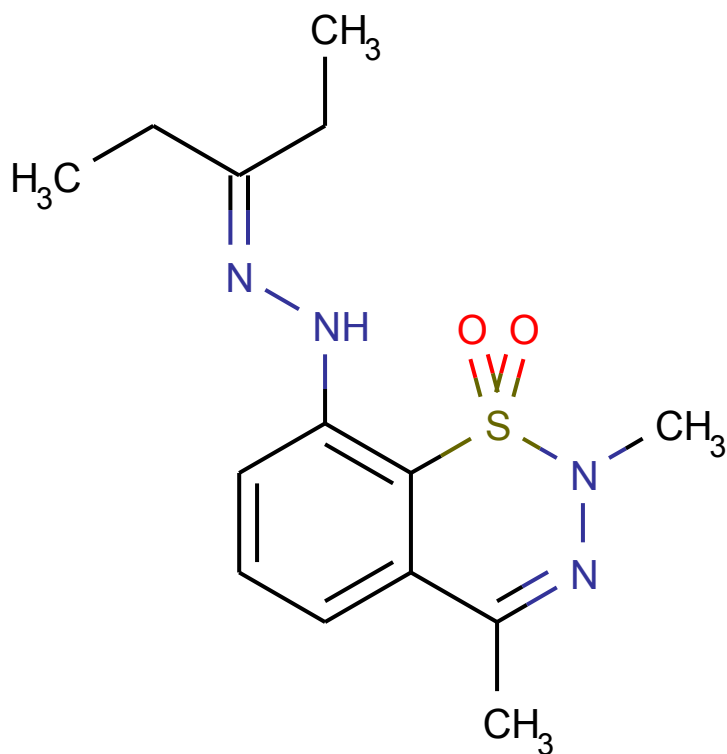

February 4, 2025

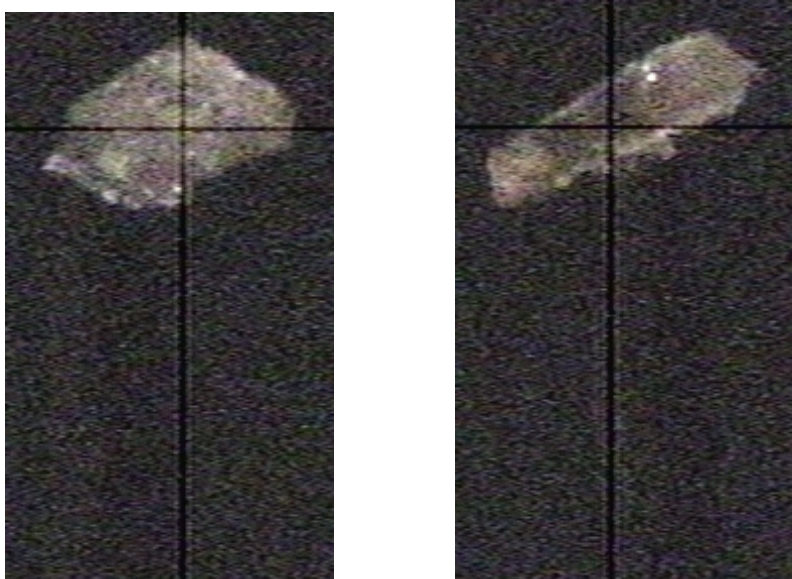

Fig. 1. The crystal

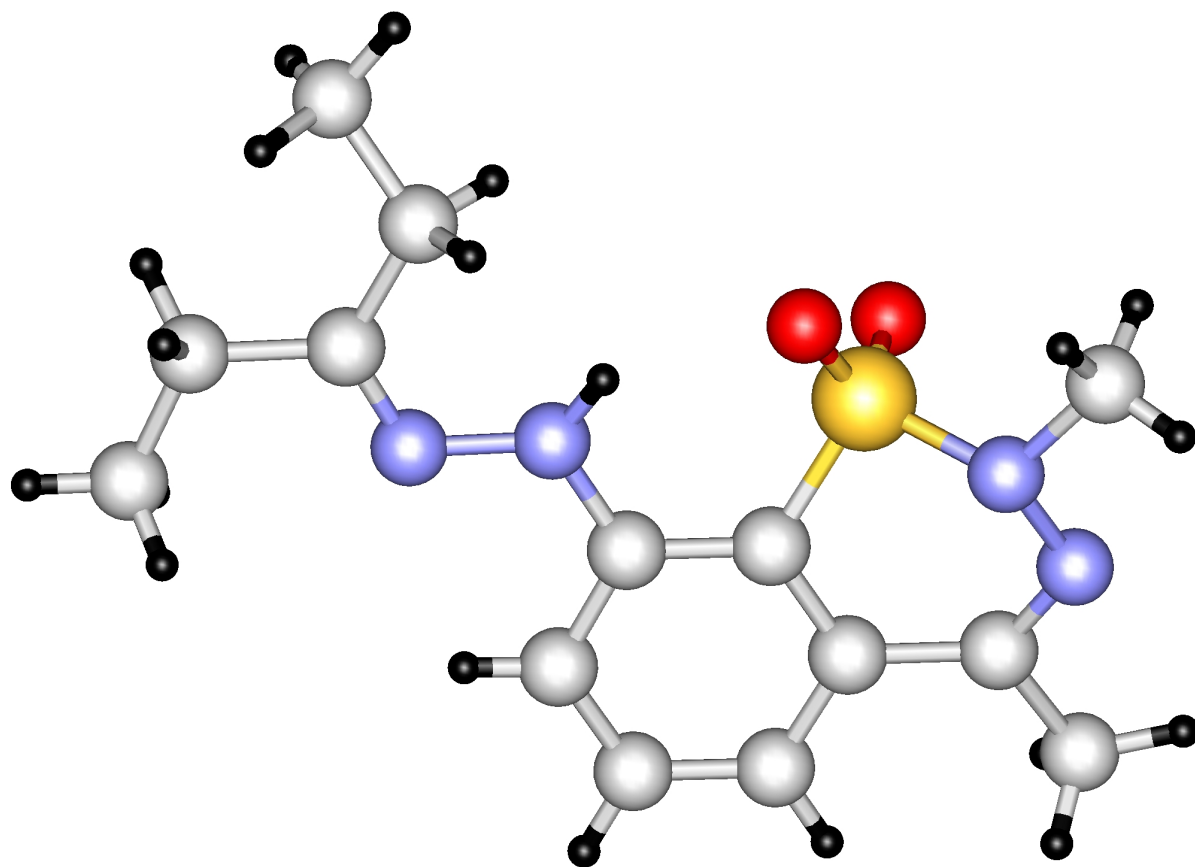

Fig. 2. The molecule

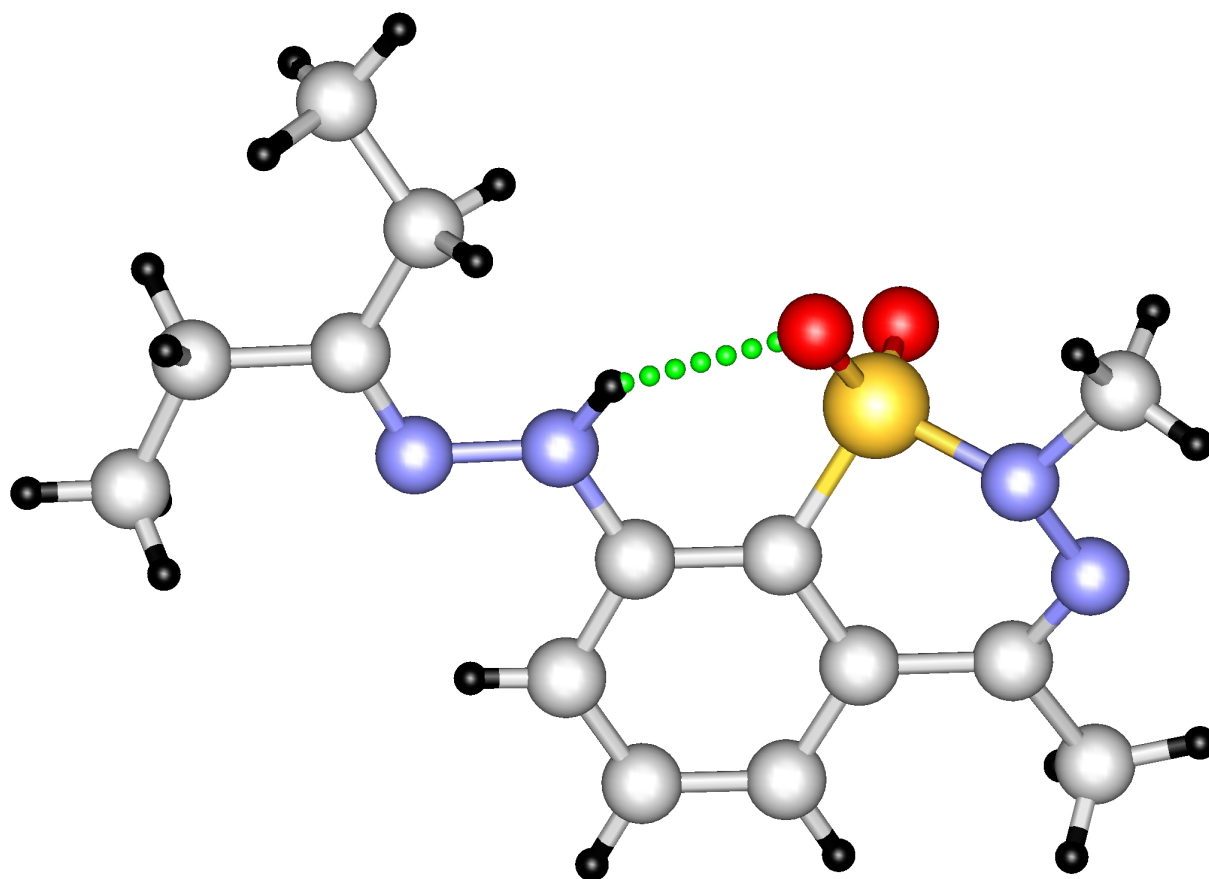

Fig. 3. Hydrogen bond

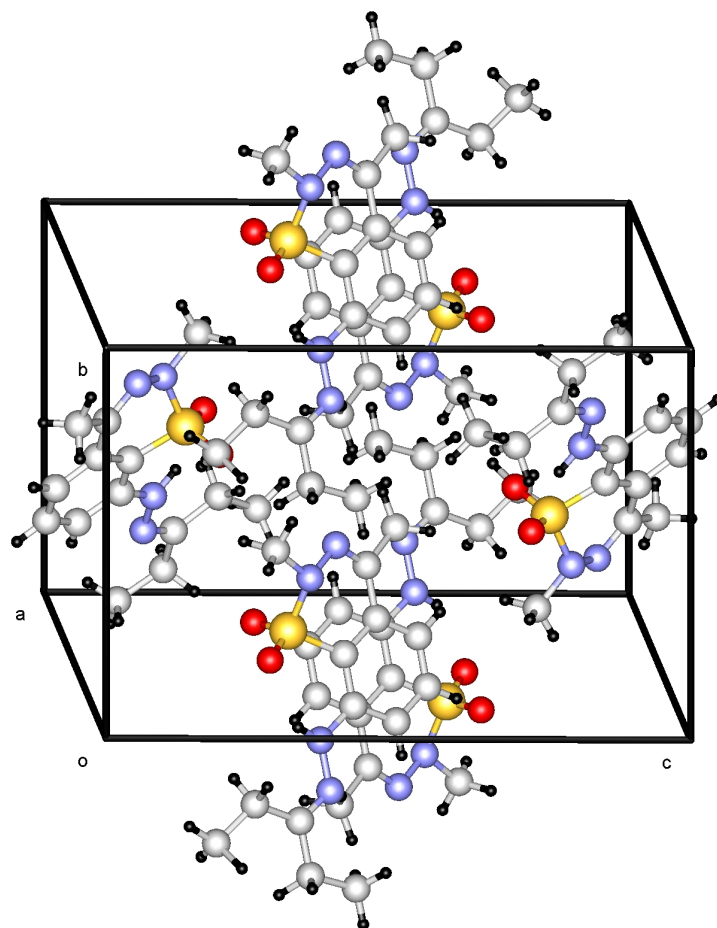

Fig. 4. Packing

## *Experimental*

### Data Collection

A colorless chunk crystal of  $C_{14}H_{20}N_4O_2S$  having approximate dimensions of 0.23 x 0.15 x 0.11 mm was mounted on a cactus needle. All measurements were made on a Rigaku RAXIS RAPID imaging plate area detector with graphite monochromated Cu-K $\alpha$  radiation.

Indexing was performed from 4 oscillations that were exposed for 300 seconds. The crystal-to-detector distance was 127.40 mm.

Cell constants and an orientation matrix for data collection corresponded to a primitive monoclinic cell with dimensions:

$$\begin{aligned}a &= 8.6949(6) \text{ \AA} \\b &= 11.6910(7) \text{ \AA} \quad \beta = 101.302(3)^\circ \\c &= 15.5734(9) \text{ \AA} \\V &= 1552.37(17) \text{ \AA}^3\end{aligned}$$

For  $Z = 4$  and F.W. = 308.40, the calculated density is 1.319 g/cm<sup>3</sup>. The systematic absences of:

$$\begin{aligned}h0l: h+l \pm 2n \\0k0: k \pm 2n\end{aligned}$$

uniquely determine the space group to be:

$$P2_1/n \text{ (\#14)}$$

The data were collected at a temperature of  $20 \pm 1^\circ\text{C}$  to a maximum  $2\theta$  value of  $143.6^\circ$ . A total of 180 oscillation images were collected. A sweep of data was done using  $\omega$  scans from  $20.0$  to  $200.0^\circ$  in  $5.0^\circ$  step, at  $\chi=0.0^\circ$  and  $\phi = 0.0^\circ$ . The exposure rate was 60.0 [sec./ $^\circ$ ]. A second sweep was performed using  $\omega$  scans from  $20.0$  to  $200.0^\circ$  in  $5.0^\circ$  step, at  $\chi=54.0^\circ$  and  $\phi = 0.0^\circ$ . The exposure rate was 60.0 [sec./ $^\circ$ ]. Another sweep was performed using  $\omega$  scans from  $20.0$  to  $200.0^\circ$  in  $5.0^\circ$  step, at  $\chi=54.0^\circ$  and  $\phi = 90.0^\circ$ . The exposure rate was 60.0 [sec./ $^\circ$ ]. Another sweep was performed using  $\omega$  scans from  $20.0$  to  $200.0^\circ$  in  $5.0^\circ$  step, at  $\chi=54.0^\circ$  and  $\phi = 180.0^\circ$ . The exposure rate was 60.0 [sec./ $^\circ$ ]. Another sweep was performed using  $\omega$  scans from  $20.0$  to  $200.0^\circ$  in  $5.0^\circ$  step, at  $\chi=54.0^\circ$  and  $\phi = 270.0^\circ$ . The exposure rate was 60.0 [sec./ $^\circ$ ]. The crystal-to-detector distance was 127.40 mm. Readout was performed in the 0.100 mm pixel mode.

## Data Reduction

Of the 17855 reflections that were collected, 3003 were unique ( $R_{\text{int}} = 0.056$ ).

The linear absorption coefficient,  $\mu$ , for Cu-K $\alpha$  radiation is 19.434 cm<sup>-1</sup>. An empirical absorption correction was applied which resulted in transmission factors ranging from 0.616 to 0.806. The data were corrected for Lorentz and polarization effects.

## Structure Solution and Refinement

The structure was solved by direct methods<sup>1</sup> and expanded using Fourier techniques<sup>2</sup>. The non-hydrogen atoms were refined anisotropically. Hydrogen atoms were refined isotropically. The final cycle of full-matrix least-squares refinement<sup>3</sup> on F was based on 9367 observed reflections ( $I > 2.00\sigma(I)$ ) and 270 variable parameters and converged (largest parameter shift was 0.00 times its esd) with unweighted and weighted agreement factors of:

$$R = \sum ||F_o| - |F_c|| / \sum |F_o| = 0.0353$$

$$R_w = [ \sum w (|F_o| - |F_c|)^2 / \sum w F_o^2 ]^{1/2} = 0.0366$$

The standard deviation of an observation of unit weight<sup>4</sup> was 2.86. Unit weights were used. Plots of  $\sum w (|F_o| - |F_c|)^2$  versus  $|F_o|$ , reflection order in data collection,  $\sin \theta/\lambda$  and various classes of indices showed no unusual trends. The maximum and minimum peaks on the final difference Fourier map corresponded to 3.77 and -2.92 e<sup>-</sup>/Å<sup>3</sup>, respectively.

Neutral atom scattering factors were taken from Cromer and Waber<sup>5</sup>. Anomalous dispersion effects were included in Fcalc<sup>6</sup>; the values for  $\Delta f'$  and  $\Delta f''$  were those of Creagh and McAuley<sup>7</sup>. The values for the mass attenuation coefficients are those of Creagh and Hubbell<sup>8</sup>. All calculations were performed using the CrystalStructure<sup>9,10</sup> crystallographic software package.

## *References*

- (1) SIR92: Altomare, A., Cascarano, G., Giacovazzo, C., Guagliardi, A., Burla, M., Polidori, G., and Camalli, M. (1994) J. Appl. Cryst., 27, 435.
- (2) DIRDIF99: Beurskens, P.T., Admiraal, G., Beurskens, G., Bosman, W.P., de Gelder, R., Israel, R. and Smits, J.M.M.(1999). The DIRDIF-99 program system, Technical Report of the Crystallography Laboratory, University of Nijmegen, The Netherlands.

(3) Least Squares function minimized:

$$\sum w(|F_o| - |F_c|)^2 \quad \text{where } w = \text{Least Squares weights.}$$

(4) Standard deviation of an observation of unit weight:

$$[\sum w(|F_o| - |F_c|)^2 / (N_o - N_v)]^{1/2}$$

where:  $N_o$  = number of observations

$N_v$  = number of variables

(5) Cromer, D. T. & Waber, J. T.; "International Tables for X-ray Crystallography", Vol. IV, The Kynoch Press, Birmingham, England, Table 2.2 A (1974).

(6) Ibers, J. A. & Hamilton, W. C.; Acta Crystallogr., 17, 781 (1964).

(7) Creagh, D. C. & McAuley, W.J. .; "International Tables for Crystallography", Vol C, (A.J.C. Wilson, ed.), Kluwer Academic Publishers, Boston, Table 4.2.6.8, pages 219-222 (1992).

(8) Creagh, D. C. & Hubbell, J.H.; "International Tables for Crystallography", Vol C, (A.J.C. Wilson, ed.), Kluwer Academic Publishers, Boston, Table 4.2.4.3, pages 200-206 (1992).

(9) CrystalStructure 3.7.0: Crystal Structure Analysis Package, Rigaku and Rigaku/MSK (2000-2005). 9009 New Trails Dr. The Woodlands TX 77381 USA.

(10) CRYSTALS Issue 10: Watkin, D.J., Prout, C.K. Carruthers, J.R. & Betteridge, P.W. Chemical Crystallography Laboratory, Oxford, UK. (1996)



## EXPERIMENTAL DETAILS

### A. Crystal Data

|                         |                                                                                                                                                              |
|-------------------------|--------------------------------------------------------------------------------------------------------------------------------------------------------------|
| Empirical Formula       | $\text{C}_{14}\text{H}_{20}\text{N}_4\text{O}_2\text{S}$                                                                                                     |
| Formula Weight          | 308.40                                                                                                                                                       |
| Crystal Color, Habit    | colorless, chunk                                                                                                                                             |
| Crystal Dimensions      | 0.23 X 0.15 X 0.11 mm                                                                                                                                        |
| Crystal System          | monoclinic                                                                                                                                                   |
| Lattice Type            | Primitive                                                                                                                                                    |
| Indexing Images         | 4 oscillations @ 300.0 seconds                                                                                                                               |
| Detector Position       | 127.40 mm                                                                                                                                                    |
| Pixel Size              | 0.100 mm                                                                                                                                                     |
| Lattice Parameters      | $a = 8.6949(6) \text{ \AA}$<br>$b = 11.6910(7) \text{ \AA}$<br>$c = 15.5734(9) \text{ \AA}$<br>$\beta = 101.302(3)^\circ$<br>$V = 1552.37(17) \text{ \AA}^3$ |
| Space Group             | $P2_1/n$ (#14)                                                                                                                                               |
| Z value                 | 4                                                                                                                                                            |
| $D_{\text{calc}}$       | $1.319 \text{ g/cm}^3$                                                                                                                                       |
| $F_{000}$               | 656.00                                                                                                                                                       |
| $\mu(\text{CuK}\alpha)$ | $19.434 \text{ cm}^{-1}$                                                                                                                                     |

## B. Intensity Measurements

|                                                           |                                                                       |
|-----------------------------------------------------------|-----------------------------------------------------------------------|
| Diffractometer                                            | Rigaku RAXIS-RAPID                                                    |
| Radiation                                                 | CuK $\alpha$ ( $\lambda$ = 1.54187 Å)<br>graphite monochromated       |
| Detector Aperture                                         | 280 mm x 256 mm                                                       |
| Data Images                                               | 180 exposures                                                         |
| $\omega$ oscillation Range ( $\chi$ =0.0, $\phi$ =0.0)    | 20.0 - 200.0 $^{\circ}$                                               |
| Exposure Rate                                             | 60.0 sec./ $^{\circ}$                                                 |
| $\omega$ oscillation Range ( $\chi$ =54.0, $\phi$ =0.0)   | 20.0 - 200.0 $^{\circ}$                                               |
| Exposure Rate                                             | 60.0 sec./ $^{\circ}$                                                 |
| $\omega$ oscillation Range ( $\chi$ =54.0, $\phi$ =90.0)  | 20.0 - 200.0 $^{\circ}$                                               |
| Exposure Rate                                             | 60.0 sec./ $^{\circ}$                                                 |
| $\omega$ oscillation Range ( $\chi$ =54.0, $\phi$ =180.0) | 20.0 - 200.0 $^{\circ}$                                               |
| Exposure Rate                                             | 60.0 sec./ $^{\circ}$                                                 |
| $\omega$ oscillation Range ( $\chi$ =54.0, $\phi$ =270.0) | 20.0 - 200.0 $^{\circ}$                                               |
| Exposure Rate                                             | 60.0 sec./ $^{\circ}$                                                 |
| Detector Position                                         | 127.40 mm                                                             |
| Pixel Size                                                | 0.100 mm                                                              |
| $2\theta_{\max}$                                          | 143.6 $^{\circ}$                                                      |
| No. of Reflections Measured                               | Total: 17855<br>Unique: 3003 ( $R_{\text{int}}$ = 0.056)              |
| Corrections                                               | Lorentz-polarization<br>Absorption<br>(trans. factors: 0.616 - 0.806) |

### C. Structure Solution and Refinement

|                                          |                                      |
|------------------------------------------|--------------------------------------|
| Structure Solution                       | Direct Methods (SIR92)               |
| Refinement                               | Full-matrix least-squares on F       |
| Function Minimized                       | $\Sigma w ( Fo  -  Fc )^2$           |
| Least Squares Weights                    | 1                                    |
| $2\theta_{\text{max}}$ cutoff            | 143.6 <sup>o</sup>                   |
| Anomalous Dispersion                     | All non-hydrogen atoms               |
| No. Observations ( $I > 2.00\sigma(I)$ ) | 9367                                 |
| No. Variables                            | 270                                  |
| Reflection/Parameter Ratio               | 34.69                                |
| Residuals: R ( $I > 2.00\sigma(I)$ )     | 0.0353                               |
| Residuals: Rw ( $I > 2.00\sigma(I)$ )    | 0.0366                               |
| Goodness of Fit Indicator                | 2.858                                |
| Max Shift/Error in Final Cycle           | 0.000                                |
| Maximum peak in Final Diff. Map          | 3.77 e <sup>-</sup> /Å <sup>3</sup>  |
| Minimum peak in Final Diff. Map          | -2.92 e <sup>-</sup> /Å <sup>3</sup> |

Table 1. Atomic coordinates and  $B_{\text{iso}}/B_{\text{eq}}$

| atom  | x           | y            | z           | $B_{\text{eq}}$ |
|-------|-------------|--------------|-------------|-----------------|
| S(1)  | 0.22080(6)  | 0.19427(4)   | 0.33504(3)  | 4.246(13)       |
| O(2)  | 0.34465(13) | 0.16948(10)  | 0.28900(6)  | 5.34(3)         |
| O(3)  | 0.06296(12) | 0.17756(10)  | 0.28724(6)  | 5.25(3)         |
| N(4)  | 0.23077(17) | 0.32562(12)  | 0.37334(9)  | 4.26(4)         |
| N(5)  | 0.36754(19) | 0.35898(12)  | 0.43206(10) | 4.66(4)         |
| N(6)  | 0.0839(2)   | -0.03466(17) | 0.37541(12) | 4.98(5)         |
| N(7)  | 0.0292(2)   | -0.14331(13) | 0.38645(10) | 4.89(5)         |
| C(8)  | 0.2555(2)   | 0.12179(16)  | 0.43391(10) | 3.42(5)         |
| C(9)  | 0.3684(2)   | 0.17081(17)  | 0.50111(11) | 3.83(5)         |
| C(10) | 0.4282(2)   | 0.28546(18)  | 0.49112(12) | 4.23(5)         |
| C(11) | -0.0736(2)  | -0.18253(19) | 0.32378(14) | 4.93(6)         |
| C(12) | 0.4163(2)   | 0.1083(2)    | 0.57763(13) | 4.84(6)         |
| C(13) | -0.1308(3)  | -0.3020(2)   | 0.33566(19) | 6.02(8)         |
| C(14) | 0.3527(2)   | 0.0025(2)    | 0.58641(14) | 5.41(6)         |
| C(15) | 0.1901(2)   | 0.01457(17)  | 0.44294(12) | 3.98(5)         |
| C(16) | 0.2399(2)   | -0.0444(2)   | 0.52176(14) | 4.84(6)         |
| C(17) | 0.5698(3)   | 0.3292(2)    | 0.55494(18) | 6.22(8)         |
| C(18) | 0.1766(3)   | 0.4164(2)    | 0.3089(2)   | 5.97(8)         |
| C(19) | -0.1361(4)  | -0.1171(2)   | 0.2403(2)   | 6.97(9)         |
| C(20) | -0.2270(4)  | -0.1829(3)   | 0.1645(2)   | 8.65(10)        |
| C(21) | -0.0642(4)  | -0.3582(2)   | 0.4212(2)   | 7.31(10)        |
| H(1)  | 0.4975(18)  | 0.1402(13)   | 0.6238(10)  | 6.2(5)          |
| H(2)  | 0.3870(17)  | -0.0401(12)  | 0.6405(9)   | 5.0(4)          |
| H(3)  | 0.1940(17)  | -0.1136(12)  | 0.5264(9)   | 3.7(4)          |
| H(4)  | 0.0382(19)  | 0.0153(14)   | 0.3323(11)  | 6.1(6)          |
| H(5)  | 0.5512(18)  | 0.3264(14)   | 0.6125(10)  | 6.2(6)          |
| H(6)  | 0.657(2)    | 0.2744(17)   | 0.5617(13)  | 9.7(8)          |
| H(7)  | 0.597(2)    | 0.4093(15)   | 0.5365(11)  | 7.8(6)          |
| H(8)  | 0.178(2)    | 0.4885(19)   | 0.3369(14)  | 11.5(9)         |
| H(9)  | 0.069(2)    | 0.4054(14)   | 0.2850(10)  | 5.9(6)          |
| H(10) | 0.235(2)    | 0.4175(18)   | 0.2603(15)  | 11.7(10)        |
| H(11) | -0.242(2)   | -0.2942(15)  | 0.3272(10)  | 6.2(6)          |
| H(12) | -0.120(2)   | -0.3551(15)  | 0.2833(12)  | 8.4(6)          |
| H(13) | -0.109(2)   | -0.4335(17)  | 0.4284(13)  | 10.0(8)         |
| H(14) | 0.051(2)    | -0.3677(18)  | 0.4316(13)  | 10.1(9)         |
| H(15) | -0.073(2)   | -0.3153(18)  | 0.4708(13)  | 9.7(8)          |
| H(16) | -0.199(2)   | -0.0492(16)  | 0.2548(11)  | 7.4(6)          |

Table 1. Atomic coordinates and  $B_{\text{iso}}/B_{\text{eq}}$  (continued)

| atom  | x         | y           | z          | $B_{\text{eq}}$ |
|-------|-----------|-------------|------------|-----------------|
| H(17) | -0.066(2) | -0.0778(18) | 0.2117(13) | 9.2(9)          |
| H(18) | -0.331(4) | -0.209(2)   | 0.197(2)   | 23.6(17)        |
| H(19) | -0.157(2) | -0.244(2)   | 0.1463(15) | 13.4(11)        |
| H(20) | -0.261(2) | -0.1278(16) | 0.1151(12) | 8.9(7)          |

$$B_{\text{eq}} = 8/3 \pi^2 (U_{11}(aa^*)^2 + U_{22}(bb^*)^2 + U_{33}(cc^*)^2 + 2U_{12}(aa^*bb^*)\cos \gamma + 2U_{13}(aa^*cc^*)\cos \beta + 2U_{23}(bb^*cc^*)\cos \alpha)$$

Table 2. Anisotropic displacement parameters

| atom  | U <sub>11</sub> | U <sub>22</sub> | U <sub>33</sub> | U <sub>12</sub> | U <sub>13</sub> | U <sub>23</sub> |
|-------|-----------------|-----------------|-----------------|-----------------|-----------------|-----------------|
| S(1)  | 0.0666(3)       | 0.0463(3)       | 0.0445(2)       | -0.0034(3)      | 0.0012(2)       | -0.0000(3)      |
| O(2)  | 0.0786(9)       | 0.0754(10)      | 0.0536(8)       | -0.0022(8)      | 0.0244(7)       | -0.0041(7)      |
| O(3)  | 0.0650(9)       | 0.0646(9)       | 0.0585(8)       | -0.0058(7)      | -0.0156(6)      | 0.0034(7)       |
| N(4)  | 0.0709(11)      | 0.0350(11)      | 0.0493(9)       | 0.0016(9)       | -0.0040(8)      | 0.0004(8)       |
| N(5)  | 0.0743(13)      | 0.0459(11)      | 0.0510(10)      | -0.0066(9)      | -0.0016(9)      | -0.0050(9)      |
| N(6)  | 0.0775(14)      | 0.0445(13)      | 0.0615(12)      | -0.0104(11)     | -0.0001(10)     | 0.0009(11)      |
| N(7)  | 0.0748(13)      | 0.0421(12)      | 0.0694(12)      | -0.0118(10)     | 0.0153(9)       | -0.0068(10)     |
| C(8)  | 0.0521(13)      | 0.0368(13)      | 0.0384(11)      | 0.0015(10)      | 0.0026(9)       | -0.0000(9)      |
| C(9)  | 0.0588(14)      | 0.0435(15)      | 0.0410(12)      | 0.0011(11)      | 0.0046(10)      | -0.0022(10)     |
| C(10) | 0.0631(14)      | 0.0493(16)      | 0.0454(12)      | -0.0060(12)     | 0.0038(10)      | -0.0052(11)     |
| C(11) | 0.0701(16)      | 0.0462(16)      | 0.0726(16)      | -0.0056(14)     | 0.0181(12)      | -0.0111(14)     |
| C(12) | 0.0715(17)      | 0.0558(17)      | 0.0501(15)      | -0.0015(13)     | -0.0038(12)     | -0.0011(13)     |
| C(13) | 0.080(2)        | 0.0597(19)      | 0.089(2)        | -0.0133(17)     | 0.0162(16)      | -0.0108(17)     |
| C(14) | 0.0906(19)      | 0.0606(18)      | 0.0497(15)      | 0.0095(14)      | 0.0021(13)      | 0.0111(14)      |
| C(15) | 0.0601(14)      | 0.0447(14)      | 0.0453(13)      | 0.0025(11)      | 0.0077(11)      | -0.0024(11)     |
| C(16) | 0.0792(18)      | 0.0417(16)      | 0.0623(16)      | -0.0051(14)     | 0.0125(13)      | 0.0033(13)      |
| C(17) | 0.094(2)        | 0.071(2)        | 0.0603(18)      | -0.0222(18)     | -0.0123(15)     | -0.0017(16)     |
| C(18) | 0.089(2)        | 0.0512(19)      | 0.076(2)        | 0.0036(16)      | -0.0102(18)     | 0.0118(16)      |
| C(19) | 0.114(2)        | 0.060(2)        | 0.078(2)        | -0.015(2)       | -0.0112(19)     | -0.0096(17)     |
| C(20) | 0.118(2)        | 0.111(2)        | 0.089(2)        | 0.012(2)        | -0.0042(19)     | -0.007(2)       |
| C(21) | 0.114(3)        | 0.062(2)        | 0.104(2)        | -0.016(2)       | 0.028(2)        | 0.002(2)        |

The general temperature factor expression:  $\exp(-2\pi^2(a^2U_{11}h^2 + b^2U_{22}k^2 + c^2U_{33}l^2 + 2a*b*U_{12}hk + 2a*c*U_{13}hl + 2b*c*U_{23}kl))$

Table 3. Bond lengths (Å)

| atom  | atom  | distance   | atom  | atom  | distance   |
|-------|-------|------------|-------|-------|------------|
| S(1)  | O(2)  | 1.4354(14) | S(1)  | O(3)  | 1.4406(11) |
| S(1)  | N(4)  | 1.6435(15) | S(1)  | C(8)  | 1.7314(16) |
| N(4)  | N(5)  | 1.4058(19) | N(4)  | C(18) | 1.474(3)   |
| N(5)  | C(10) | 1.293(2)   | N(6)  | N(7)  | 1.379(2)   |
| N(6)  | C(15) | 1.382(2)   | N(6)  | H(4)  | 0.919(16)  |
| N(7)  | C(11) | 1.273(2)   | C(8)  | C(9)  | 1.409(2)   |
| C(8)  | C(15) | 1.395(2)   | C(9)  | C(10) | 1.457(2)   |
| C(9)  | C(12) | 1.390(2)   | C(10) | C(17) | 1.512(3)   |
| C(11) | C(13) | 1.507(3)   | C(11) | C(19) | 1.514(3)   |
| C(12) | C(14) | 1.373(3)   | C(12) | H(1)  | 0.977(15)  |
| C(13) | C(21) | 1.496(4)   | C(13) | H(11) | 0.950(17)  |
| C(13) | H(12) | 1.045(19)  | C(14) | C(16) | 1.375(3)   |
| C(14) | H(2)  | 0.974(14)  | C(15) | C(16) | 1.400(2)   |
| C(16) | H(3)  | 0.911(14)  | C(17) | H(5)  | 0.942(17)  |
| C(17) | H(6)  | 0.99(2)    | C(17) | H(7)  | 1.021(18)  |
| C(18) | H(8)  | 0.95(2)    | C(18) | H(9)  | 0.947(16)  |
| C(18) | H(10) | 0.99(2)    | C(19) | C(20) | 1.498(4)   |
| C(19) | H(16) | 1.016(19)  | C(19) | H(17) | 0.94(2)    |
| C(20) | H(18) | 1.17(3)    | C(20) | H(19) | 1.01(2)    |
| C(20) | H(20) | 1.003(19)  | C(21) | H(13) | 0.98(2)    |
| C(21) | H(14) | 0.99(2)    | C(21) | H(15) | 0.94(2)    |

Table 4. Bond angles ( $^{\circ}$ )

| atom  | atom  | atom  | angle      | atom  | atom  | atom  | angle      |
|-------|-------|-------|------------|-------|-------|-------|------------|
| O(2)  | S(1)  | O(3)  | 116.52(6)  | O(2)  | S(1)  | N(4)  | 112.24(7)  |
| O(2)  | S(1)  | C(8)  | 109.16(8)  | O(3)  | S(1)  | N(4)  | 106.94(7)  |
| O(3)  | S(1)  | C(8)  | 112.06(8)  | N(4)  | S(1)  | C(8)  | 98.45(8)   |
| S(1)  | N(4)  | N(5)  | 118.23(11) | S(1)  | N(4)  | C(18) | 116.02(14) |
| N(5)  | N(4)  | C(18) | 111.12(16) | N(4)  | N(5)  | C(10) | 116.96(14) |
| N(7)  | N(6)  | C(15) | 118.96(16) | N(7)  | N(6)  | H(4)  | 124.5(10)  |
| C(15) | N(6)  | H(4)  | 114.8(10)  | N(6)  | N(7)  | C(11) | 116.35(16) |
| S(1)  | C(8)  | C(9)  | 115.87(14) | S(1)  | C(8)  | C(15) | 121.74(12) |
| C(9)  | C(8)  | C(15) | 121.94(15) | C(8)  | C(9)  | C(10) | 120.41(15) |
| C(8)  | C(9)  | C(12) | 118.09(18) | C(10) | C(9)  | C(12) | 121.46(16) |
| N(5)  | C(10) | C(9)  | 125.66(15) | N(5)  | C(10) | C(17) | 114.11(19) |
| C(9)  | C(10) | C(17) | 120.20(18) | N(7)  | C(11) | C(13) | 116.0(2)   |
| N(7)  | C(11) | C(19) | 123.8(2)   | C(13) | C(11) | C(19) | 120.1(2)   |
| C(9)  | C(12) | C(14) | 120.02(18) | C(9)  | C(12) | H(1)  | 118.8(9)   |
| C(14) | C(12) | H(1)  | 121.2(9)   | C(11) | C(13) | C(21) | 115.9(2)   |
| C(11) | C(13) | H(11) | 104.1(11)  | C(11) | C(13) | H(12) | 111.8(10)  |
| C(21) | C(13) | H(11) | 111.8(10)  | C(21) | C(13) | H(12) | 110.8(10)  |
| H(11) | C(13) | H(12) | 101.4(14)  | C(12) | C(14) | C(16) | 122.0(2)   |
| C(12) | C(14) | H(2)  | 119.1(8)   | C(16) | C(14) | H(2)  | 118.9(8)   |
| N(6)  | C(15) | C(8)  | 121.49(16) | N(6)  | C(15) | C(16) | 120.50(18) |
| C(8)  | C(15) | C(16) | 117.96(16) | C(14) | C(16) | C(15) | 119.9(2)   |
| C(14) | C(16) | H(3)  | 123.9(8)   | C(15) | C(16) | H(3)  | 116.2(8)   |
| C(10) | C(17) | H(5)  | 110.1(9)   | C(10) | C(17) | H(6)  | 111.3(11)  |
| C(10) | C(17) | H(7)  | 109.3(9)   | H(5)  | C(17) | H(6)  | 98.5(15)   |
| H(5)  | C(17) | H(7)  | 113.2(14)  | H(6)  | C(17) | H(7)  | 114.1(16)  |
| N(4)  | C(18) | H(8)  | 110.7(12)  | N(4)  | C(18) | H(9)  | 109.3(10)  |
| N(4)  | C(18) | H(10) | 112.7(12)  | H(8)  | C(18) | H(9)  | 102.8(16)  |
| H(8)  | C(18) | H(10) | 112.3(19)  | H(9)  | C(18) | H(10) | 108.6(16)  |
| C(11) | C(19) | C(20) | 117.5(2)   | C(11) | C(19) | H(16) | 108.9(10)  |
| C(11) | C(19) | H(17) | 119.8(12)  | C(20) | C(19) | H(16) | 110.6(9)   |
| C(20) | C(19) | H(17) | 99.7(12)   | H(16) | C(19) | H(17) | 98.7(17)   |
| C(19) | C(20) | H(18) | 97.1(15)   | C(19) | C(20) | H(19) | 109.3(13)  |
| C(19) | C(20) | H(20) | 107.8(11)  | H(18) | C(20) | H(19) | 120(2)     |
| H(18) | C(20) | H(20) | 111(2)     | H(19) | C(20) | H(20) | 109.9(18)  |
| C(13) | C(21) | H(13) | 113.8(11)  | C(13) | C(21) | H(14) | 113.5(12)  |
| C(13) | C(21) | H(15) | 114.8(12)  | H(13) | C(21) | H(14) | 107.1(17)  |
| H(13) | C(21) | H(15) | 106.7(18)  | H(14) | C(21) | H(15) | 99.7(17)   |

Table 5. Torsion Angles( $^{\circ}$ )

| atom1 | atom2 | atom3 | atom4 | angle       | atom1 | atom2 | atom3 | atom4 | angle       |
|-------|-------|-------|-------|-------------|-------|-------|-------|-------|-------------|
| O(2)  | S(1)  | N(4)  | N(5)  | -59.01(14)  | O(2)  | S(1)  | N(4)  | C(18) | 76.81(18)   |
| O(2)  | S(1)  | C(8)  | C(9)  | 78.36(15)   | O(2)  | S(1)  | C(8)  | C(15) | -94.05(16)  |
| O(3)  | S(1)  | N(4)  | N(5)  | 172.03(12)  | O(3)  | S(1)  | N(4)  | C(18) | -52.16(19)  |
| O(3)  | S(1)  | C(8)  | C(9)  | -151.04(13) | O(3)  | S(1)  | C(8)  | C(15) | 36.56(18)   |
| N(4)  | S(1)  | C(8)  | C(9)  | -38.83(15)  | N(4)  | S(1)  | C(8)  | C(15) | 148.77(16)  |
| C(8)  | S(1)  | N(4)  | N(5)  | 55.78(14)   | C(8)  | S(1)  | N(4)  | C(18) | -168.40(18) |
| S(1)  | N(4)  | N(5)  | C(10) | -41.1(2)    | C(18) | N(4)  | N(5)  | C(10) | -178.9(2)   |
| N(4)  | N(5)  | C(10) | C(9)  | 1.0(2)      | N(4)  | N(5)  | C(10) | C(17) | -176.87(18) |
| N(7)  | N(6)  | C(15) | C(8)  | 176.71(18)  | N(7)  | N(6)  | C(15) | C(16) | -0.8(3)     |
| C(15) | N(6)  | N(7)  | C(11) | 177.0(2)    | N(6)  | N(7)  | C(11) | C(13) | 179.0(2)    |
| N(6)  | N(7)  | C(11) | C(19) | 0.1(3)      | S(1)  | C(8)  | C(9)  | C(10) | 10.8(2)     |
| S(1)  | C(8)  | C(9)  | C(12) | -171.34(16) | S(1)  | C(8)  | C(15) | N(6)  | -5.6(2)     |
| S(1)  | C(8)  | C(15) | C(16) | 172.00(16)  | C(9)  | C(8)  | C(15) | N(6)  | -177.53(18) |
| C(9)  | C(8)  | C(15) | C(16) | 0.1(2)      | C(15) | C(8)  | C(9)  | C(10) | -176.85(18) |
| C(15) | C(8)  | C(9)  | C(12) | 1.0(2)      | C(8)  | C(9)  | C(10) | N(5)  | 13.7(3)     |
| C(8)  | C(9)  | C(10) | C(17) | -168.5(2)   | C(8)  | C(9)  | C(12) | C(14) | -0.7(3)     |
| C(10) | C(9)  | C(12) | C(14) | 177.2(2)    | C(12) | C(9)  | C(10) | N(5)  | -164.1(2)   |
| C(12) | C(9)  | C(10) | C(17) | 13.6(3)     | N(7)  | C(11) | C(13) | C(21) | 2.3(3)      |
| N(7)  | C(11) | C(19) | C(20) | 165.9(2)    | C(13) | C(11) | C(19) | C(20) | -12.9(4)    |
| C(19) | C(11) | C(13) | C(21) | -178.8(2)   | C(9)  | C(12) | C(14) | C(16) | -0.9(3)     |
| C(12) | C(14) | C(16) | C(15) | 2.0(3)      | N(6)  | C(15) | C(16) | C(14) | 176.0(2)    |
| C(8)  | C(15) | C(16) | C(14) | -1.6(3)     |       |       |       |       |             |

The sign is positive if when looking from atom 2 to atom 3 a clock-wise motion of atom 1 would superimpose it on atom 4.



Table 6. Distances beyond the asymmetric unit out to 3.60 Å

| atom  | atom                 | distance  | atom  | atom                 | distance  |
|-------|----------------------|-----------|-------|----------------------|-----------|
| S(1)  | H(5) <sup>11</sup>   | 3.499(15) | S(1)  | H(18) <sup>21</sup>  | 3.51(3)   |
| O(2)  | C(11) <sup>31</sup>  | 3.378(2)  | O(2)  | C(13) <sup>31</sup>  | 3.459(3)  |
| O(2)  | C(14) <sup>41</sup>  | 3.568(2)  | O(2)  | C(18) <sup>51</sup>  | 3.317(3)  |
| O(2)  | H(2) <sup>41</sup>   | 2.817(14) | O(2)  | H(5) <sup>11</sup>   | 3.365(14) |
| O(2)  | H(8) <sup>51</sup>   | 2.87(2)   | O(2)  | H(9) <sup>51</sup>   | 3.430(17) |
| O(2)  | H(10) <sup>51</sup>  | 3.09(2)   | O(2)  | H(12) <sup>31</sup>  | 2.849(19) |
| O(2)  | H(17) <sup>31</sup>  | 3.53(2)   | O(2)  | H(19) <sup>31</sup>  | 2.89(2)   |
| O(3)  | C(20) <sup>21</sup>  | 3.553(4)  | O(3)  | H(1) <sup>11</sup>   | 3.283(15) |
| O(3)  | H(5) <sup>11</sup>   | 2.704(17) | O(3)  | H(11) <sup>21</sup>  | 3.023(15) |
| O(3)  | H(18) <sup>21</sup>  | 2.46(3)   | N(4)  | H(15) <sup>61</sup>  | 3.01(2)   |
| N(4)  | H(18) <sup>21</sup>  | 3.46(3)   | N(5)  | H(7) <sup>71</sup>   | 2.759(18) |
| N(5)  | H(13) <sup>61</sup>  | 3.53(2)   | N(5)  | H(15) <sup>61</sup>  | 3.26(2)   |
| N(5)  | H(17) <sup>31</sup>  | 3.17(2)   | N(5)  | H(19) <sup>31</sup>  | 3.24(2)   |
| N(6)  | H(3) <sup>61</sup>   | 3.554(15) | N(6)  | H(10) <sup>51</sup>  | 2.93(2)   |
| N(7)  | H(6) <sup>41</sup>   | 3.09(2)   | N(7)  | H(10) <sup>51</sup>  | 3.43(2)   |
| C(8)  | H(15) <sup>61</sup>  | 3.28(2)   | C(9)  | H(11) <sup>61</sup>  | 3.406(18) |
| C(9)  | H(15) <sup>61</sup>  | 3.17(2)   | C(10) | H(7) <sup>71</sup>   | 3.596(18) |
| C(10) | H(11) <sup>61</sup>  | 3.528(18) | C(10) | H(15) <sup>61</sup>  | 3.28(2)   |
| C(10) | H(19) <sup>31</sup>  | 3.21(2)   | C(11) | O(2) <sup>51</sup>   | 3.378(2)  |
| C(12) | H(9) <sup>81</sup>   | 3.246(15) | C(12) | H(10) <sup>81</sup>  | 3.57(2)   |
| C(12) | H(11) <sup>61</sup>  | 3.179(18) | C(12) | H(16) <sup>61</sup>  | 3.574(19) |
| C(13) | O(2) <sup>51</sup>   | 3.459(3)  | C(13) | H(2) <sup>91</sup>   | 3.585(15) |
| C(13) | H(16) <sup>101</sup> | 3.420(18) | C(14) | O(2) <sup>41</sup>   | 3.568(2)  |
| C(14) | H(9) <sup>81</sup>   | 3.460(15) | C(14) | H(12) <sup>111</sup> | 3.484(18) |
| C(14) | H(16) <sup>61</sup>  | 3.080(19) | C(14) | H(19) <sup>111</sup> | 3.17(2)   |
| C(15) | H(1) <sup>41</sup>   | 3.583(17) | C(15) | H(10) <sup>51</sup>  | 3.54(2)   |
| C(16) | H(6) <sup>41</sup>   | 3.19(2)   | C(16) | H(19) <sup>111</sup> | 3.16(2)   |
| C(17) | H(7) <sup>71</sup>   | 3.560(18) | C(17) | H(8) <sup>71</sup>   | 3.28(2)   |
| C(17) | H(14) <sup>41</sup>  | 3.30(2)   | C(17) | H(19) <sup>31</sup>  | 3.47(2)   |
| C(17) | H(20) <sup>31</sup>  | 3.43(2)   | C(18) | O(2) <sup>31</sup>   | 3.317(3)  |
| C(18) | H(1) <sup>11</sup>   | 3.067(15) | C(18) | H(2) <sup>11</sup>   | 3.566(13) |
| C(18) | H(7) <sup>71</sup>   | 3.459(17) | C(18) | H(14) <sup>121</sup> | 3.47(2)   |
| C(18) | H(17) <sup>31</sup>  | 3.46(2)   | C(18) | H(18) <sup>21</sup>  | 3.32(3)   |
| C(19) | H(10) <sup>51</sup>  | 3.51(2)   | C(20) | O(3) <sup>101</sup>  | 3.553(4)  |
| C(20) | H(2) <sup>91</sup>   | 3.428(15) | C(20) | H(3) <sup>91</sup>   | 3.191(14) |
| C(20) | H(9) <sup>101</sup>  | 3.381(18) | C(20) | H(13) <sup>21</sup>  | 3.44(2)   |
| C(21) | H(8) <sup>131</sup>  | 3.23(2)   | C(21) | H(13) <sup>141</sup> | 3.51(2)   |

Table 6. Distances beyond the asymmetric unit out to 3.60 Å (continued)

| atom  | atom                 | distance  | atom  | atom                 | distance  |
|-------|----------------------|-----------|-------|----------------------|-----------|
| C(21) | H(20) <sup>10)</sup> | 3.497(19) | H(1)  | O(3) <sup>8)</sup>   | 3.283(15) |
| H(1)  | C(15) <sup>4)</sup>  | 3.583(17) | H(1)  | C(18) <sup>8)</sup>  | 3.067(15) |
| H(1)  | H(9) <sup>8)</sup>   | 2.52(2)   | H(1)  | H(10) <sup>8)</sup>  | 2.74(2)   |
| H(1)  | H(11) <sup>6)</sup>  | 3.07(2)   | H(1)  | H(18) <sup>6)</sup>  | 3.47(4)   |
| H(2)  | O(2) <sup>4)</sup>   | 2.817(14) | H(2)  | C(13) <sup>11)</sup> | 3.585(15) |
| H(2)  | C(18) <sup>8)</sup>  | 3.566(13) | H(2)  | C(20) <sup>11)</sup> | 3.428(15) |
| H(2)  | H(9) <sup>8)</sup>   | 2.94(2)   | H(2)  | H(10) <sup>8)</sup>  | 3.53(2)   |
| H(2)  | H(12) <sup>11)</sup> | 2.55(2)   | H(2)  | H(16) <sup>6)</sup>  | 2.73(2)   |
| H(2)  | H(19) <sup>11)</sup> | 2.56(2)   | H(3)  | N(6) <sup>6)</sup>   | 3.554(15) |
| H(3)  | C(20) <sup>11)</sup> | 3.191(14) | H(3)  | H(4) <sup>6)</sup>   | 3.46(2)   |
| H(3)  | H(6) <sup>4)</sup>   | 2.79(2)   | H(3)  | H(18) <sup>11)</sup> | 3.42(3)   |
| H(3)  | H(19) <sup>11)</sup> | 2.64(2)   | H(3)  | H(20) <sup>11)</sup> | 3.32(2)   |
| H(4)  | H(3) <sup>6)</sup>   | 3.46(2)   | H(4)  | H(10) <sup>5)</sup>  | 2.90(3)   |
| H(5)  | S(1) <sup>8)</sup>   | 3.499(15) | H(5)  | O(2) <sup>8)</sup>   | 3.365(14) |
| H(5)  | O(3) <sup>8)</sup>   | 2.704(17) | H(5)  | H(8) <sup>7)</sup>   | 3.18(2)   |
| H(5)  | H(11) <sup>6)</sup>  | 3.04(2)   | H(5)  | H(17) <sup>8)</sup>  | 3.56(2)   |
| H(6)  | N(7) <sup>4)</sup>   | 3.09(2)   | H(6)  | C(16) <sup>4)</sup>  | 3.19(2)   |
| H(6)  | H(3) <sup>4)</sup>   | 2.79(2)   | H(6)  | H(8) <sup>7)</sup>   | 3.37(2)   |
| H(6)  | H(14) <sup>4)</sup>  | 2.74(2)   | H(6)  | H(19) <sup>3)</sup>  | 3.25(3)   |
| H(6)  | H(20) <sup>3)</sup>  | 3.27(3)   | H(7)  | N(5) <sup>7)</sup>   | 2.759(18) |
| H(7)  | C(10) <sup>7)</sup>  | 3.596(18) | H(7)  | C(17) <sup>7)</sup>  | 3.560(18) |
| H(7)  | C(18) <sup>7)</sup>  | 3.459(17) | H(7)  | H(7) <sup>7)</sup>   | 2.81(2)   |
| H(7)  | H(8) <sup>7)</sup>   | 2.76(2)   | H(7)  | H(14) <sup>4)</sup>  | 3.04(2)   |
| H(7)  | H(19) <sup>3)</sup>  | 3.49(3)   | H(7)  | H(20) <sup>3)</sup>  | 3.02(2)   |
| H(8)  | O(2) <sup>3)</sup>   | 2.87(2)   | H(8)  | C(17) <sup>7)</sup>  | 3.28(2)   |
| H(8)  | C(21) <sup>12)</sup> | 3.23(2)   | H(8)  | H(5) <sup>7)</sup>   | 3.18(2)   |
| H(8)  | H(6) <sup>7)</sup>   | 3.37(2)   | H(8)  | H(7) <sup>7)</sup>   | 2.76(2)   |
| H(8)  | H(12) <sup>12)</sup> | 3.14(2)   | H(8)  | H(13) <sup>12)</sup> | 3.24(3)   |
| H(8)  | H(14) <sup>12)</sup> | 2.62(3)   | H(9)  | O(2) <sup>3)</sup>   | 3.430(17) |
| H(9)  | C(12) <sup>1)</sup>  | 3.246(15) | H(9)  | C(14) <sup>1)</sup>  | 3.460(15) |
| H(9)  | C(20) <sup>2)</sup>  | 3.381(18) | H(9)  | H(1) <sup>1)</sup>   | 2.52(2)   |
| H(9)  | H(2) <sup>1)</sup>   | 2.94(2)   | H(9)  | H(12) <sup>12)</sup> | 3.24(2)   |
| H(9)  | H(13) <sup>12)</sup> | 3.50(2)   | H(9)  | H(14) <sup>12)</sup> | 3.52(2)   |
| H(9)  | H(16) <sup>2)</sup>  | 3.19(2)   | H(9)  | H(18) <sup>2)</sup>  | 2.52(4)   |
| H(9)  | H(20) <sup>2)</sup>  | 3.37(2)   | H(10) | O(2) <sup>3)</sup>   | 3.09(2)   |
| H(10) | N(6) <sup>3)</sup>   | 2.93(2)   | H(10) | N(7) <sup>3)</sup>   | 3.43(2)   |
| H(10) | C(12) <sup>1)</sup>  | 3.57(2)   | H(10) | C(15) <sup>3)</sup>  | 3.54(2)   |

Table 6. Distances beyond the asymmetric unit out to 3.60 Å (continued)

| atom  | atom                 | distance  | atom  | atom                 | distance  |
|-------|----------------------|-----------|-------|----------------------|-----------|
| H(10) | C(19) <sup>3)</sup>  | 3.51(2)   | H(10) | H(1) <sup>1)</sup>   | 2.74(2)   |
| H(10) | H(2) <sup>1)</sup>   | 3.53(2)   | H(10) | H(4) <sup>3)</sup>   | 2.90(3)   |
| H(10) | H(17) <sup>3)</sup>  | 2.83(3)   | H(11) | O(3) <sup>10)</sup>  | 3.023(15) |
| H(11) | C(9) <sup>6)</sup>   | 3.406(18) | H(11) | C(10) <sup>6)</sup>  | 3.528(18) |
| H(11) | C(12) <sup>6)</sup>  | 3.179(18) | H(11) | H(1) <sup>6)</sup>   | 3.07(2)   |
| H(11) | H(5) <sup>6)</sup>   | 3.04(2)   | H(11) | H(16) <sup>10)</sup> | 3.24(2)   |
| H(12) | O(2) <sup>5)</sup>   | 2.849(19) | H(12) | C(14) <sup>9)</sup>  | 3.484(19) |
| H(12) | H(2) <sup>9)</sup>   | 2.55(2)   | H(12) | H(8) <sup>13)</sup>  | 3.14(2)   |
| H(12) | H(9) <sup>13)</sup>  | 3.24(2)   | H(12) | H(16) <sup>10)</sup> | 2.76(2)   |
| H(13) | N(5) <sup>6)</sup>   | 3.53(2)   | H(13) | C(20) <sup>10)</sup> | 3.44(2)   |
| H(13) | C(21) <sup>14)</sup> | 3.51(2)   | H(13) | H(8) <sup>13)</sup>  | 3.24(3)   |
| H(13) | H(9) <sup>13)</sup>  | 3.50(2)   | H(13) | H(13) <sup>14)</sup> | 3.05(2)   |
| H(13) | H(14) <sup>14)</sup> | 3.16(2)   | H(13) | H(15) <sup>14)</sup> | 3.55(2)   |
| H(13) | H(16) <sup>10)</sup> | 3.30(2)   | H(13) | H(20) <sup>10)</sup> | 2.57(2)   |
| H(14) | C(17) <sup>4)</sup>  | 3.30(2)   | H(14) | C(18) <sup>13)</sup> | 3.47(2)   |
| H(14) | H(6) <sup>4)</sup>   | 2.74(2)   | H(14) | H(7) <sup>4)</sup>   | 3.04(2)   |
| H(14) | H(8) <sup>13)</sup>  | 2.62(3)   | H(14) | H(9) <sup>13)</sup>  | 3.52(2)   |
| H(14) | H(13) <sup>14)</sup> | 3.16(2)   | H(14) | H(20) <sup>11)</sup> | 3.00(2)   |
| H(15) | N(4) <sup>6)</sup>   | 3.01(2)   | H(15) | N(5) <sup>6)</sup>   | 3.26(2)   |
| H(15) | C(8) <sup>6)</sup>   | 3.28(2)   | H(15) | C(9) <sup>6)</sup>   | 3.17(2)   |
| H(15) | C(10) <sup>6)</sup>  | 3.28(2)   | H(15) | H(13) <sup>14)</sup> | 3.55(2)   |
| H(15) | H(20) <sup>11)</sup> | 3.23(2)   | H(16) | C(12) <sup>6)</sup>  | 3.574(19) |
| H(16) | C(13) <sup>2)</sup>  | 3.420(18) | H(16) | C(14) <sup>6)</sup>  | 3.080(19) |
| H(16) | H(2) <sup>6)</sup>   | 2.73(2)   | H(16) | H(9) <sup>10)</sup>  | 3.19(2)   |
| H(16) | H(11) <sup>2)</sup>  | 3.24(2)   | H(16) | H(12) <sup>2)</sup>  | 2.76(2)   |
| H(16) | H(13) <sup>2)</sup>  | 3.30(2)   | H(17) | O(2) <sup>5)</sup>   | 3.53(2)   |
| H(17) | N(5) <sup>5)</sup>   | 3.17(2)   | H(17) | C(18) <sup>5)</sup>  | 3.46(2)   |
| H(17) | H(5) <sup>1)</sup>   | 3.56(2)   | H(17) | H(10) <sup>5)</sup>  | 2.83(3)   |
| H(18) | S(1) <sup>10)</sup>  | 3.51(3)   | H(18) | O(3) <sup>10)</sup>  | 2.46(3)   |
| H(18) | N(4) <sup>10)</sup>  | 3.46(3)   | H(18) | C(18) <sup>10)</sup> | 3.32(3)   |
| H(18) | H(1) <sup>6)</sup>   | 3.47(4)   | H(18) | H(3) <sup>9)</sup>   | 3.42(3)   |
| H(18) | H(9) <sup>10)</sup>  | 2.52(4)   | H(19) | O(2) <sup>5)</sup>   | 2.89(2)   |
| H(19) | N(5) <sup>5)</sup>   | 3.24(2)   | H(19) | C(10) <sup>5)</sup>  | 3.21(2)   |
| H(19) | C(14) <sup>9)</sup>  | 3.17(2)   | H(19) | C(16) <sup>9)</sup>  | 3.16(2)   |
| H(19) | C(17) <sup>5)</sup>  | 3.47(2)   | H(19) | H(2) <sup>9)</sup>   | 2.56(2)   |
| H(19) | H(3) <sup>9)</sup>   | 2.64(2)   | H(19) | H(6) <sup>5)</sup>   | 3.25(3)   |
| H(19) | H(7) <sup>5)</sup>   | 3.49(3)   | H(20) | C(17) <sup>5)</sup>  | 3.43(2)   |

Table 6. Distances beyond the asymmetric unit out to 3.60 Å (continued)

| atom  | atom                | distance  | atom  | atom                | distance |
|-------|---------------------|-----------|-------|---------------------|----------|
| H(20) | C(21) <sup>2)</sup> | 3.497(19) | H(20) | H(3) <sup>9)</sup>  | 3.32(2)  |
| H(20) | H(6) <sup>5)</sup>  | 3.27(3)   | H(20) | H(7) <sup>5)</sup>  | 3.02(2)  |
| H(20) | H(9) <sup>10)</sup> | 3.37(2)   | H(20) | H(13) <sup>2)</sup> | 2.57(2)  |
| H(20) | H(14) <sup>9)</sup> | 3.00(2)   | H(20) | H(15) <sup>9)</sup> | 3.23(2)  |

Symmetry Operators:

- |                              |                              |
|------------------------------|------------------------------|
| (1) X+1/2-1,-Y+1/2,Z+1/2-1   | (2) -X+1/2-1,Y+1/2,-Z+1/2    |
| (3) -X+1/2,Y+1/2,-Z+1/2      | (4) -X+1,-Y,-Z+1             |
| (5) -X+1/2,Y+1/2-1,-Z+1/2    | (6) -X,-Y,-Z+1               |
| (7) -X+1,-Y+1,-Z+1           | (8) X+1/2,-Y+1/2,Z+1/2       |
| (9) X+1/2-1,-Y+1/2-1,Z+1/2-1 | (10) -X+1/2-1,Y+1/2-1,-Z+1/2 |
| (11) X+1/2,-Y+1/2-1,Z+1/2    | (12) X,Y+1,Z                 |
| (13) X,Y-1,Z                 | (14) -X,-Y-1,-Z+1            |

Table 7. Intramolecular and Intermolecular Hydrogen bonds

| D    | H    | A    | D...A    | D-H       | H...A     | D-H...A   |
|------|------|------|----------|-----------|-----------|-----------|
| N(6) | H(4) | O(3) | 2.824(2) | 0.919(16) | 2.049(17) | 141.2(13) |

- Note) 1. The symmetry operations are applied to the acceptors.  
 2. Estimated standard deviations (esd's) are shown in the parentheses.  
 They are not calculated when all atoms have an esd=0.0.
