# Supplementary material for: Thiadiazino-indole, thiadiazino-carbazole and benzothiadiazino-carbazole dioxides: synthesis, physicochemical and early ADME characterization of representatives of new tri-, tetra- and pentacyclic ring systems and their intermediates
Source: publisher site journal article supplement (doi:10.3762/bjoc.21.169), 2025-10-21
Supplement: Additional file 2 [file 7d_xrd.pdf › Átnevezett XRD/7d_xrd.pdf]

**143739**

**PGY0808\_1**

Submitted by: Pusztai Gyongyver  
Operator: Dancso Andras

X-ray Structure Report

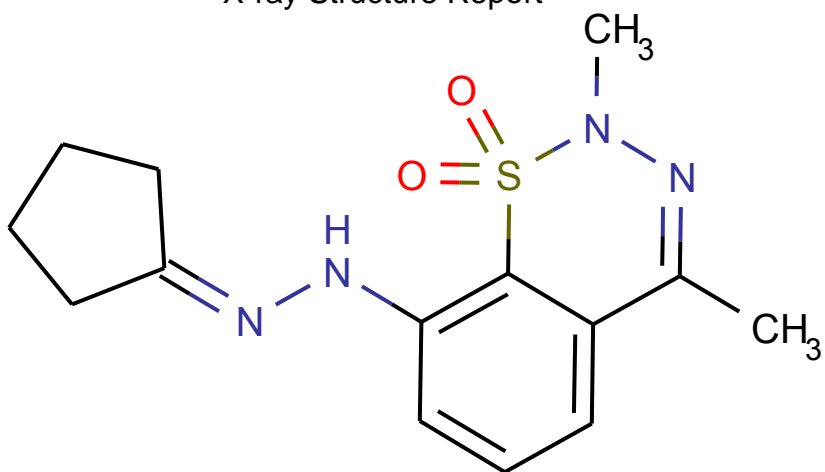

December 6, 2024

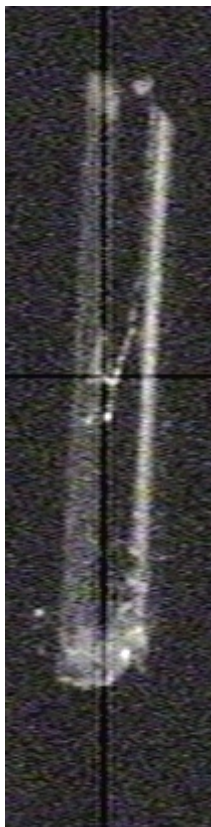

Fig 1. The crystal

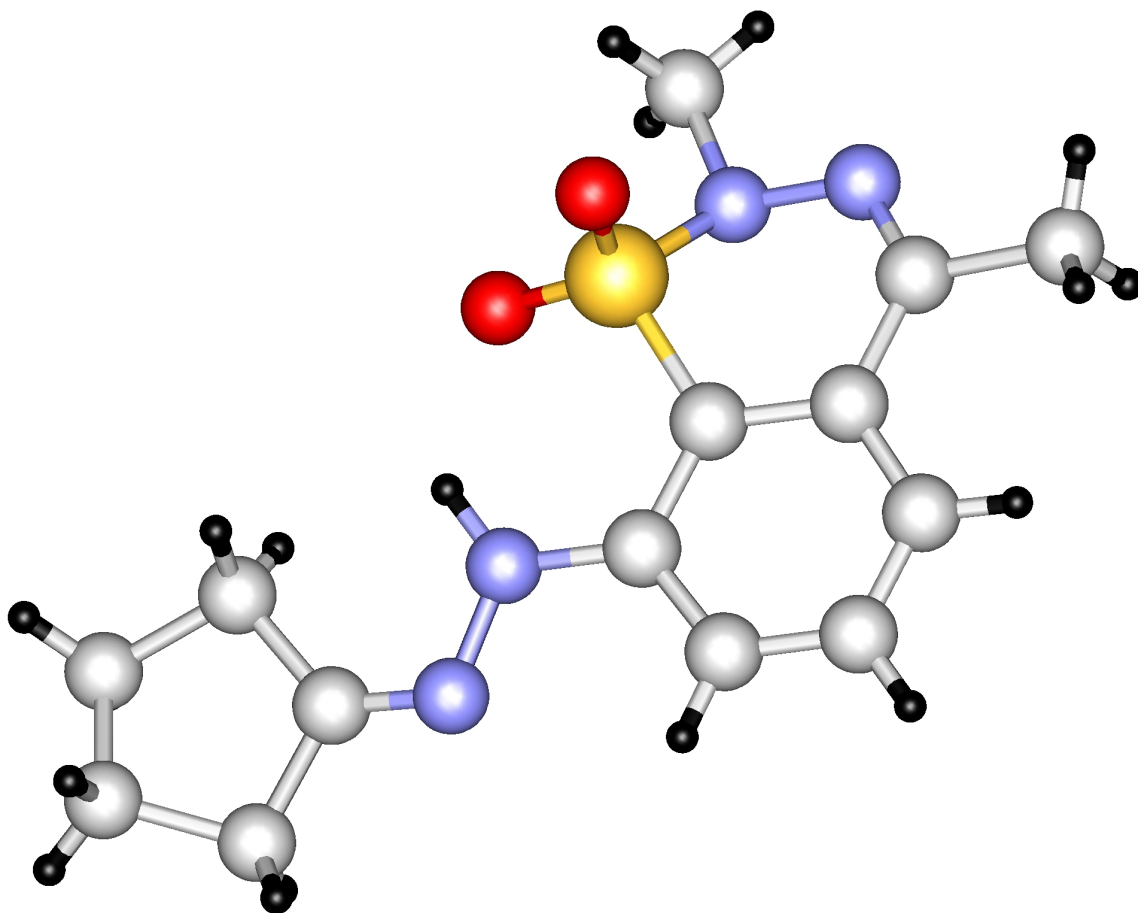

Fig. 2. The molecule (hydrogens were generated by the software)

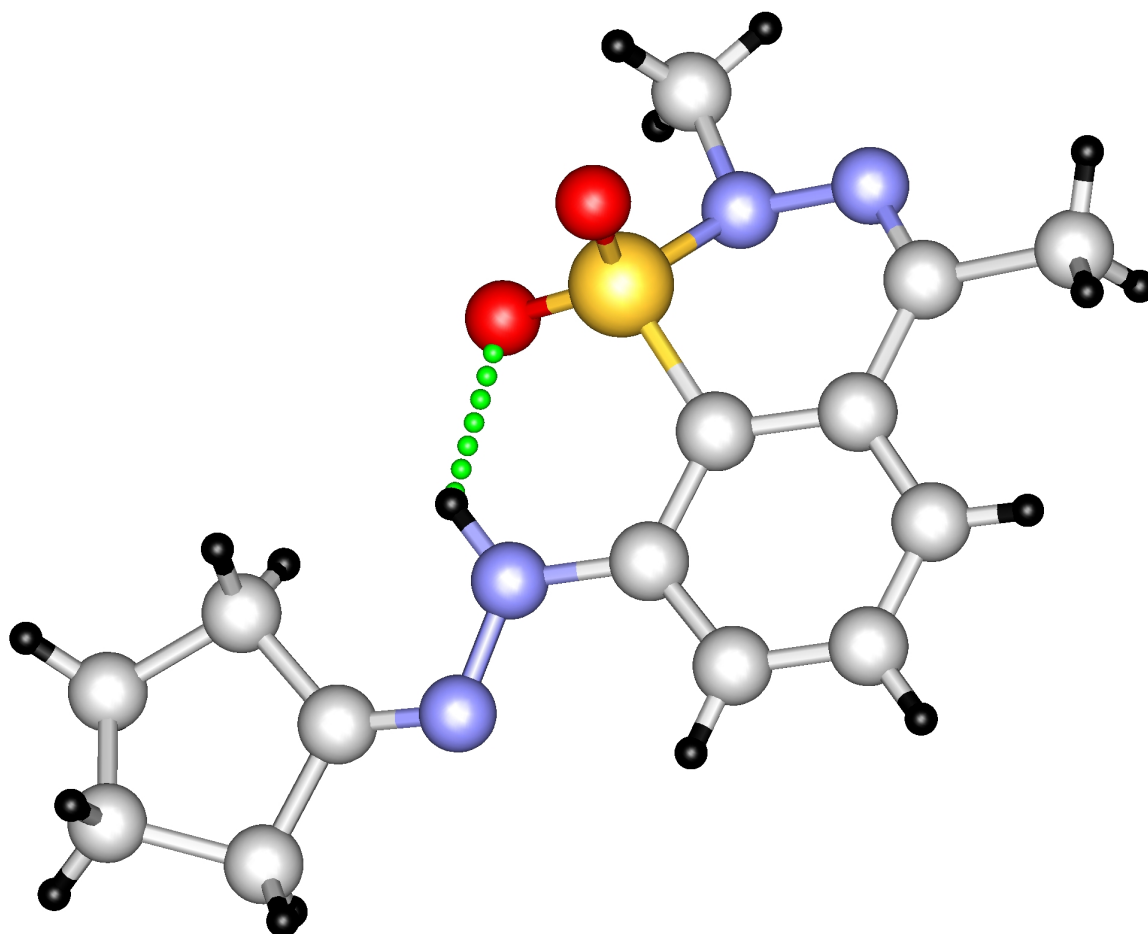

Fig. 3. Hydrogen bond

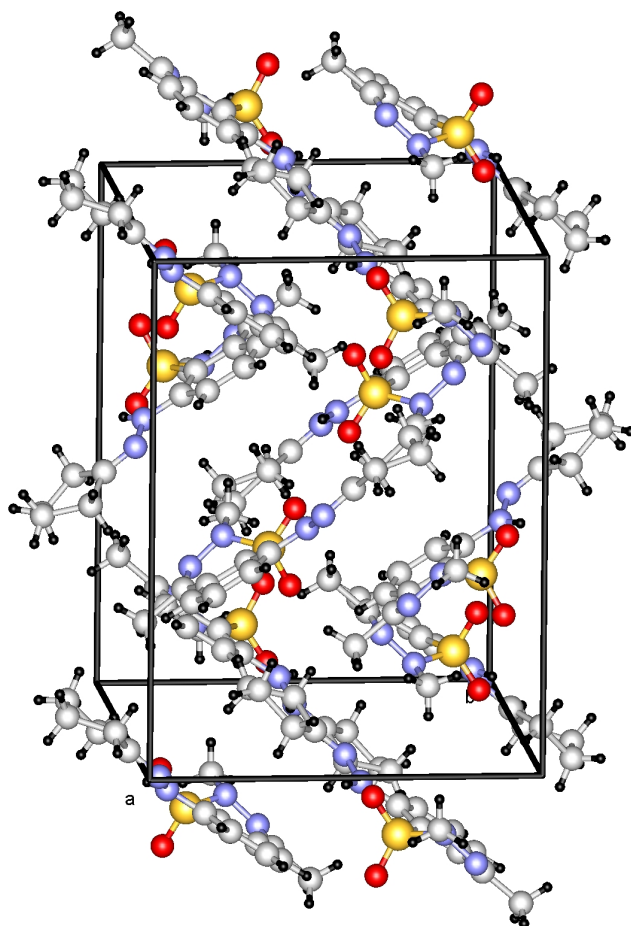

Fig. 4. Packing

## *Experimental*

### Data Collection

A colorless prism crystal of  $C_{14}H_{18}N_4O_2S$  having approximate dimensions of 0.86 x 0.14 x 0.06 mm was mounted on a cactus needle. All measurements were made on a Rigaku RAXIS RAPID imaging plate area detector with graphite monochromated Cu-K $\alpha$  radiation.

Indexing was performed from 4 oscillations that were exposed for 600 seconds. The crystal-to-detector distance was 127.40 mm.

Cell constants and an orientation matrix for data collection corresponded to a primitive orthorhombic cell with dimensions:

$$\begin{aligned}a &= 15.4671(4) \text{ \AA} \\b &= 12.1069(4) \text{ \AA} \\c &= 16.1873(5) \text{ \AA} \\V &= 3031.21(16) \text{ \AA}^3\end{aligned}$$

For  $Z = 8$  and F.W. = 306.38, the calculated density is 1.343 g/cm<sup>3</sup>. The systematic absences of:

$$\begin{aligned}0kl: k \pm 2n \\h0l: l \pm 2n \\hk0: h \pm 2n\end{aligned}$$

uniquely determine the space group to be:

Pbca (#61)

The data were collected at a temperature of  $20 \pm 1^\circ\text{C}$  to a maximum  $2\theta$  value of  $149.6^\circ$ . A total of 180 oscillation images were collected. A sweep of data was done using  $\omega$  scans from  $20.0$  to  $200.0^\circ$  in  $5.0^\circ$  step, at  $\chi=0.0^\circ$  and  $\phi = 0.0^\circ$ . The exposure rate was 120.0 [sec./ $^\circ$ ]. A second sweep was performed using  $\omega$  scans from  $20.0$  to  $200.0^\circ$  in  $5.0^\circ$  step, at  $\chi=54.0^\circ$  and  $\phi = 0.0^\circ$ . The exposure rate was 120.0 [sec./ $^\circ$ ]. Another sweep was performed using  $\omega$  scans from  $20.0$  to  $200.0^\circ$  in  $5.0^\circ$  step, at  $\chi=54.0^\circ$  and  $\phi = 90.0^\circ$ . The exposure rate was 120.0 [sec./ $^\circ$ ]. Another sweep was performed using  $\omega$  scans from  $20.0$  to  $200.0^\circ$  in  $5.0^\circ$  step, at  $\chi=54.0^\circ$  and  $\phi = 180.0^\circ$ . The exposure rate was 120.0 [sec./ $^\circ$ ]. Another sweep was performed using  $\omega$  scans from  $20.0$  to  $200.0^\circ$  in  $5.0^\circ$  step, at  $\chi=54.0^\circ$  and  $\phi = 270.0^\circ$ . The exposure rate was 120.0 [sec./ $^\circ$ ]. The crystal-to-detector distance was 127.40 mm. Readout was performed in the 0.100 mm pixel mode.

## Data Reduction

Of the 32069 reflections that were collected, 2856 were unique ( $R_{\text{int}} = 0.052$ ).

The linear absorption coefficient,  $\mu$ , for Cu-K $\alpha$  radiation is 19.902 cm<sup>-1</sup>. An empirical absorption correction was applied which resulted in transmission factors ranging from 0.408 to 0.891. The data were corrected for Lorentz and polarization effects.

## Structure Solution and Refinement

The structure was solved by direct methods<sup>1</sup> and expanded using Fourier techniques<sup>2</sup>. The non-hydrogen atoms were refined anisotropically. Hydrogen atoms were refined using the riding model. The final cycle of full-matrix least-squares refinement<sup>3</sup> on F was based on 22924 observed reflections ( $I > 2.00\sigma(I)$ ) and 208 variable parameters and converged (largest parameter shift was 0.00 times its esd) with unweighted and weighted agreement factors of:

$$R = \Sigma ||F_o| - |F_c|| / \Sigma |F_o| = 0.0793$$

$$R_w = [ \Sigma w (|F_o| - |F_c|)^2 / \Sigma w F_o^2 ]^{1/2} = 0.0927$$

The standard deviation of an observation of unit weight<sup>4</sup> was 6.13. Unit weights were used. Plots of  $\Sigma w (|F_o| - |F_c|)^2$  versus  $|F_o|$ , reflection order in data collection,  $\sin \theta/\lambda$  and various classes of indices showed no unusual trends. The maximum and minimum peaks on the final difference Fourier map corresponded to 9.25 and -10.10 e<sup>-</sup>/Å<sup>3</sup>, respectively.

Neutral atom scattering factors were taken from Cromer and Waber<sup>5</sup>. Anomalous dispersion effects were included in Fcalc<sup>6</sup>; the values for  $\Delta f'$  and  $\Delta f''$  were those of Creagh and McAuley<sup>7</sup>. The values for the mass attenuation coefficients are those of Creagh and Hubbell<sup>8</sup>. All calculations were performed using the CrystalStructure<sup>9,10</sup> crystallographic software package.

## *References*

- (1) SIR92: Altomare, A., Cascarano, G., Giacovazzo, C., Guagliardi, A., Burla, M., Polidori, G., and Camalli, M. (1994) J. Appl. Cryst., 27, 435.
- (2) DIRDIF99: Beurskens, P.T., Admiraal, G., Beurskens, G., Bosman, W.P., de Gelder, R., Israel, R. and Smits, J.M.M.(1999). The DIRDIF-99 program system, Technical Report of the Crystallography Laboratory, University of Nijmegen, The Netherlands.

(3) Least Squares function minimized:

$$\sum w(|F_o| - |F_c|)^2 \quad \text{where } w = \text{Least Squares weights.}$$

(4) Standard deviation of an observation of unit weight:

$$[\sum w(|F_o| - |F_c|)^2 / (N_o - N_v)]^{1/2}$$

where:  $N_o$  = number of observations

$N_v$  = number of variables

(5) Cromer, D. T. & Waber, J. T.; "International Tables for X-ray Crystallography", Vol. IV, The Kynoch Press, Birmingham, England, Table 2.2 A (1974).

(6) Ibers, J. A. & Hamilton, W. C.; Acta Crystallogr., 17, 781 (1964).

(7) Creagh, D. C. & McAuley, W.J. .; "International Tables for Crystallography", Vol C, (A.J.C. Wilson, ed.), Kluwer Academic Publishers, Boston, Table 4.2.6.8, pages 219-222 (1992).

(8) Creagh, D. C. & Hubbell, J.H.; "International Tables for Crystallography", Vol C, (A.J.C. Wilson, ed.), Kluwer Academic Publishers, Boston, Table 4.2.4.3, pages 200-206 (1992).

(9) CrystalStructure 3.7.0: Crystal Structure Analysis Package, Rigaku and Rigaku/MSK (2000-2005). 9009 New Trails Dr. The Woodlands TX 77381 USA.

(10) CRYSTALS Issue 10: Watkin, D.J., Prout, C.K. Carruthers, J.R. & Betteridge, P.W. Chemical Crystallography Laboratory, Oxford, UK. (1996)



## EXPERIMENTAL DETAILS

### A. Crystal Data

|                         |                                                                                                                                 |
|-------------------------|---------------------------------------------------------------------------------------------------------------------------------|
| Empirical Formula       | $C_{14}H_{18}N_4O_2S$                                                                                                           |
| Formula Weight          | 306.38                                                                                                                          |
| Crystal Color, Habit    | colorless, prism                                                                                                                |
| Crystal Dimensions      | 0.86 X 0.14 X 0.06 mm                                                                                                           |
| Crystal System          | orthorhombic                                                                                                                    |
| Lattice Type            | Primitive                                                                                                                       |
| Indexing Images         | 4 oscillations @ 600.0 seconds                                                                                                  |
| Detector Position       | 127.40 mm                                                                                                                       |
| Pixel Size              | 0.100 mm                                                                                                                        |
| Lattice Parameters      | $a = 15.4671(4) \text{ \AA}$<br>$b = 12.1069(4) \text{ \AA}$<br>$c = 16.1873(5) \text{ \AA}$<br>$V = 3031.21(16) \text{ \AA}^3$ |
| Space Group             | Pbca (#61)                                                                                                                      |
| Z value                 | 8                                                                                                                               |
| $D_{\text{calc}}$       | $1.343 \text{ g/cm}^3$                                                                                                          |
| $F_{000}$               | 1296.00                                                                                                                         |
| $\mu(\text{CuK}\alpha)$ | $19.902 \text{ cm}^{-1}$                                                                                                        |

## B. Intensity Measurements

|                                                           |                                                                       |
|-----------------------------------------------------------|-----------------------------------------------------------------------|
| Diffractometer                                            | Rigaku RAXIS-RAPID                                                    |
| Radiation                                                 | CuK $\alpha$ ( $\lambda$ = 1.54187 Å)<br>graphite monochromated       |
| Detector Aperture                                         | 280 mm x 256 mm                                                       |
| Data Images                                               | 180 exposures                                                         |
| $\omega$ oscillation Range ( $\chi$ =0.0, $\phi$ =0.0)    | 20.0 - 200.0°                                                         |
| Exposure Rate                                             | 120.0 sec./°                                                          |
| $\omega$ oscillation Range ( $\chi$ =54.0, $\phi$ =0.0)   | 20.0 - 200.0°                                                         |
| Exposure Rate                                             | 120.0 sec./°                                                          |
| $\omega$ oscillation Range ( $\chi$ =54.0, $\phi$ =90.0)  | 20.0 - 200.0°                                                         |
| Exposure Rate                                             | 120.0 sec./°                                                          |
| $\omega$ oscillation Range ( $\chi$ =54.0, $\phi$ =180.0) | 20.0 - 200.0°                                                         |
| Exposure Rate                                             | 120.0 sec./°                                                          |
| $\omega$ oscillation Range ( $\chi$ =54.0, $\phi$ =270.0) | 20.0 - 200.0°                                                         |
| Exposure Rate                                             | 120.0 sec./°                                                          |
| Detector Position                                         | 127.40 mm                                                             |
| Pixel Size                                                | 0.100 mm                                                              |
| $2\theta_{\text{max}}$                                    | 149.6°                                                                |
| No. of Reflections Measured                               | Total: 32069<br>Unique: 2856 ( $R_{\text{int}}$ = 0.052)              |
| Corrections                                               | Lorentz-polarization<br>Absorption<br>(trans. factors: 0.408 - 0.891) |

### C. Structure Solution and Refinement

|                                          |                                |
|------------------------------------------|--------------------------------|
| Structure Solution                       | Direct Methods (SIR92)         |
| Refinement                               | Full-matrix least-squares on F |
| Function Minimized                       | $\Sigma w ( Fo  -  Fc )^2$     |
| Least Squares Weights                    | 1                              |
| $2\theta_{\text{max}}$ cutoff            | 149.6 $^{\circ}$               |
| Anomalous Dispersion                     | All non-hydrogen atoms         |
| No. Observations ( $I > 2.00\sigma(I)$ ) | 22924                          |
| No. Variables                            | 208                            |
| Reflection/Parameter Ratio               | 110.21                         |
| Residuals: R ( $I > 2.00\sigma(I)$ )     | 0.0793                         |
| Residuals: Rw ( $I > 2.00\sigma(I)$ )    | 0.0927                         |
| Goodness of Fit Indicator                | 6.133                          |
| Max Shift/Error in Final Cycle           | 0.000                          |
| Maximum peak in Final Diff. Map          | 9.25 e $^{-}/\text{\AA}^3$     |
| Minimum peak in Final Diff. Map          | -10.10 e $^{-}/\text{\AA}^3$   |

Table 1. Atomic coordinates and B<sub>iso</sub>/B<sub>eq</sub>

| atom  | x            | y           | z           | B <sub>eq</sub> |
|-------|--------------|-------------|-------------|-----------------|
| S(1)  | 0.10168(4)   | 0.14743(6)  | 0.62915(4)  | 2.952(14)       |
| O(2)  | 0.08464(9)   | 0.09073(12) | 0.70542(10) | 3.60(4)         |
| O(3)  | 0.09632(9)   | 0.08187(13) | 0.55519(10) | 4.29(4)         |
| N(4)  | 0.03741(11)  | 0.25638(18) | 0.61722(12) | 3.42(5)         |
| N(5)  | 0.04097(12)  | 0.33882(18) | 0.67591(12) | 3.44(5)         |
| N(6)  | 0.35237(12)  | 0.04431(17) | 0.52134(12) | 3.26(5)         |
| N(7)  | 0.27723(12)  | 0.07491(16) | 0.56008(12) | 3.23(5)         |
| C(8)  | 0.19977(12)  | 0.21717(19) | 0.63764(12) | 2.26(5)         |
| C(9)  | 0.27756(13)  | 0.1708(2)   | 0.60655(13) | 2.71(6)         |
| C(10) | 0.19892(14)  | 0.3161(2)   | 0.68220(12) | 2.50(6)         |
| C(11) | 0.11559(17)  | 0.3659(2)   | 0.70485(13) | 3.18(6)         |
| C(12) | 0.35371(13)  | 0.2265(2)   | 0.62804(16) | 3.48(6)         |
| C(13) | 0.27746(14)  | 0.3656(2)   | 0.69919(13) | 3.25(6)         |
| C(14) | 0.38950(17)  | -0.1958(2)  | 0.39723(14) | 4.42(7)         |
| C(15) | 0.26373(14)  | -0.1001(2)  | 0.45085(14) | 3.64(7)         |
| C(16) | 0.34370(14)  | -0.0338(2)  | 0.47211(14) | 3.13(6)         |
| C(17) | 0.35345(16)  | 0.3202(2)   | 0.67300(16) | 3.71(7)         |
| C(18) | 0.41962(16)  | -0.0778(2)  | 0.42218(17) | 4.77(8)         |
| C(19) | 0.29333(16)  | -0.1835(2)  | 0.38341(17) | 5.08(8)         |
| C(20) | 0.11544(16)  | 0.4641(2)   | 0.76745(17) | 5.22(8)         |
| C(21) | -0.05214(14) | 0.2320(2)   | 0.59202(17) | 5.57(9)         |
| H(1)  | 0.2264       | 0.0312      | 0.5555      | 3.89            |
| H(2)  | 0.4065       | 0.3550      | 0.6871      | 4.43            |
| H(3)  | 0.4075       | 0.1964      | 0.6109      | 4.19            |
| H(4)  | 0.2783       | 0.4323      | 0.7301      | 3.87            |
| H(5)  | 0.4178       | -0.2199     | 0.3484      | 5.32            |
| H(6)  | 0.4009       | -0.2465     | 0.4407      | 5.35            |
| H(7)  | 0.2445       | -0.1402     | 0.4978      | 4.39            |
| H(8)  | 0.2186       | -0.0533     | 0.4318      | 4.37            |
| H(9)  | 0.4719       | -0.0785     | 0.4530      | 5.75            |
| H(10) | 0.4270       | -0.0336     | 0.3742      | 5.75            |
| H(11) | 0.2825       | -0.1522     | 0.3306      | 6.15            |
| H(12) | 0.2642       | -0.2523     | 0.3878      | 6.12            |
| H(13) | 0.1223       | 0.5317      | 0.7383      | 6.35            |
| H(14) | 0.1619       | 0.4552      | 0.8053      | 6.32            |
| H(15) | 0.0623       | 0.4651      | 0.7968      | 6.32            |
| H(16) | -0.0554      | 0.2308      | 0.5334      | 6.77            |

Table 1. Atomic coordinates and B<sub>iso</sub>/B<sub>eq</sub> (continued)

| atom  | x       | y      | z      | B <sub>eq</sub> |
|-------|---------|--------|--------|-----------------|
| H(17) | -0.0901 | 0.2869 | 0.6129 | 6.80            |
| H(18) | -0.0684 | 0.1618 | 0.6132 | 6.76            |

$$B_{eq} = 8/3 \pi^2 (U_{11}(aa^*)^2 + U_{22}(bb^*)^2 + U_{33}(cc^*)^2 + 2U_{12}(aa^*bb^*)\cos \gamma + 2U_{13}(aa^*cc^*)\cos \beta + 2U_{23}(bb^*cc^*)\cos \alpha)$$

Table 2. Anisotropic displacement parameters

| atom  | U <sub>11</sub> | U <sub>22</sub> | U <sub>33</sub> | U <sub>12</sub> | U <sub>13</sub> | U <sub>23</sub> |
|-------|-----------------|-----------------|-----------------|-----------------|-----------------|-----------------|
| S(1)  | 0.0290(3)       | 0.0370(4)       | 0.0461(3)       | -0.0015(3)      | 0.0012(3)       | -0.0010(3)      |
| O(2)  | 0.0485(10)      | 0.0366(12)      | 0.0516(11)      | -0.0072(8)      | 0.0063(8)       | 0.0145(8)       |
| O(3)  | 0.0340(10)      | 0.0619(14)      | 0.0671(12)      | -0.0045(9)      | -0.0049(9)      | -0.0208(10)     |
| N(4)  | 0.0275(11)      | 0.0455(16)      | 0.0568(15)      | 0.0024(10)      | 0.0010(11)      | 0.0036(11)      |
| N(5)  | 0.0391(13)      | 0.0356(16)      | 0.0559(15)      | 0.0035(11)      | 0.0096(10)      | -0.0030(12)     |
| N(6)  | 0.0282(11)      | 0.0398(16)      | 0.0559(14)      | 0.0006(10)      | 0.0078(10)      | -0.0160(11)     |
| N(7)  | 0.0302(11)      | 0.0353(15)      | 0.0572(14)      | -0.0080(10)     | 0.0068(10)      | -0.0157(11)     |
| C(8)  | 0.0238(12)      | 0.0297(16)      | 0.0325(13)      | -0.0005(11)     | -0.0002(10)     | 0.0050(11)      |
| C(9)  | 0.0308(14)      | 0.0281(18)      | 0.0440(15)      | -0.0017(12)     | 0.0015(11)      | 0.0064(11)      |
| C(10) | 0.0357(14)      | 0.0249(16)      | 0.0342(14)      | 0.0014(12)      | 0.0036(11)      | 0.0011(11)      |
| C(11) | 0.0498(17)      | 0.0307(18)      | 0.0403(15)      | 0.0030(14)      | 0.0133(12)      | 0.0067(13)      |
| C(12) | 0.0224(13)      | 0.044(2)        | 0.0660(18)      | 0.0010(12)      | 0.0034(13)      | -0.0062(16)     |
| C(13) | 0.0471(16)      | 0.0288(17)      | 0.0474(15)      | -0.0048(13)     | 0.0024(12)      | -0.0107(13)     |
| C(14) | 0.0617(19)      | 0.060(2)        | 0.0460(17)      | 0.0156(16)      | 0.0063(14)      | -0.0145(14)     |
| C(15) | 0.0422(16)      | 0.051(2)        | 0.0457(16)      | -0.0015(14)     | -0.0002(12)     | -0.0127(14)     |
| C(16) | 0.0278(14)      | 0.043(2)        | 0.0486(17)      | 0.0043(13)      | 0.0057(12)      | 0.0011(14)      |
| C(17) | 0.0324(15)      | 0.045(2)        | 0.0637(18)      | -0.0044(13)     | -0.0047(13)     | -0.0143(15)     |
| C(18) | 0.0440(17)      | 0.072(2)        | 0.065(2)        | 0.0035(16)      | 0.0051(14)      | -0.0326(17)     |
| C(19) | 0.0501(18)      | 0.070(2)        | 0.074(2)        | -0.0084(16)     | 0.0013(16)      | -0.0271(18)     |
| C(20) | 0.0548(19)      | 0.044(2)        | 0.099(2)        | 0.0003(15)      | 0.0218(17)      | -0.0152(17)     |
| C(21) | 0.0306(16)      | 0.085(2)        | 0.097(2)        | 0.0010(16)      | -0.0127(15)     | 0.0008(19)      |

The general temperature factor expression:  $\exp(-2\pi^2(a^2U_{11}h^2 + b^2U_{22}k^2 + c^2U_{33}l^2 + 2a*b*U_{12}hk + 2a*c*U_{13}hl + 2b*c*U_{23}kl))$

Table 3. Bond lengths (Å)

| atom  | atom  | distance   | atom  | atom  | distance   |
|-------|-------|------------|-------|-------|------------|
| S(1)  | O(2)  | 1.4370(17) | S(1)  | O(3)  | 1.4388(17) |
| S(1)  | N(4)  | 1.663(2)   | S(1)  | C(8)  | 1.742(2)   |
| N(4)  | N(5)  | 1.379(3)   | N(4)  | C(21) | 1.474(2)   |
| N(5)  | C(11) | 1.288(3)   | N(6)  | N(7)  | 1.372(2)   |
| N(6)  | C(16) | 1.244(3)   | N(7)  | C(9)  | 1.383(3)   |
| N(7)  | H(1)  | 0.950      | C(8)  | C(9)  | 1.420(3)   |
| C(8)  | C(10) | 1.398(3)   | C(9)  | C(12) | 1.401(3)   |
| C(10) | C(11) | 1.469(3)   | C(10) | C(13) | 1.382(3)   |
| C(11) | C(20) | 1.563(3)   | C(12) | C(17) | 1.348(3)   |
| C(12) | H(3)  | 0.950      | C(13) | C(17) | 1.365(3)   |
| C(13) | H(4)  | 0.950      | C(14) | C(18) | 1.556(3)   |
| C(14) | C(19) | 1.512(3)   | C(14) | H(5)  | 0.950      |
| C(14) | H(6)  | 0.950      | C(15) | C(16) | 1.514(3)   |
| C(15) | C(19) | 1.556(3)   | C(15) | H(7)  | 0.950      |
| C(15) | H(8)  | 0.950      | C(16) | C(18) | 1.522(3)   |
| C(17) | H(2)  | 0.950      | C(18) | H(9)  | 0.950      |
| C(18) | H(10) | 0.950      | C(19) | H(11) | 0.950      |
| C(19) | H(12) | 0.950      | C(20) | H(13) | 0.950      |
| C(20) | H(14) | 0.950      | C(20) | H(15) | 0.950      |
| C(21) | H(16) | 0.950      | C(21) | H(17) | 0.950      |
| C(21) | H(18) | 0.950      |       |       |            |

Table 4. Bond angles ( $^{\circ}$ )

| atom  | atom  | atom  | angle      | atom  | atom  | atom  | angle      |
|-------|-------|-------|------------|-------|-------|-------|------------|
| O(2)  | S(1)  | O(3)  | 116.15(10) | O(2)  | S(1)  | N(4)  | 111.66(10) |
| O(2)  | S(1)  | C(8)  | 108.88(9)  | O(3)  | S(1)  | N(4)  | 107.85(10) |
| O(3)  | S(1)  | C(8)  | 112.54(9)  | N(4)  | S(1)  | C(8)  | 98.36(10)  |
| S(1)  | N(4)  | N(5)  | 118.05(15) | S(1)  | N(4)  | C(21) | 115.78(17) |
| N(5)  | N(4)  | C(21) | 111.92(18) | N(4)  | N(5)  | C(11) | 118.1(2)   |
| N(7)  | N(6)  | C(16) | 114.01(19) | N(6)  | N(7)  | C(9)  | 118.18(18) |
| N(6)  | N(7)  | H(1)  | 121.0      | C(9)  | N(7)  | H(1)  | 120.9      |
| S(1)  | C(8)  | C(9)  | 121.22(17) | S(1)  | C(8)  | C(10) | 116.60(16) |
| C(9)  | C(8)  | C(10) | 121.98(19) | N(7)  | C(9)  | C(8)  | 121.44(19) |
| N(7)  | C(9)  | C(12) | 122.8(2)   | C(8)  | C(9)  | C(12) | 115.7(2)   |
| C(8)  | C(10) | C(11) | 119.2(2)   | C(8)  | C(10) | C(13) | 117.8(2)   |
| C(11) | C(10) | C(13) | 122.9(2)   | N(5)  | C(11) | C(10) | 126.2(2)   |
| N(5)  | C(11) | C(20) | 115.3(2)   | C(10) | C(11) | C(20) | 118.4(2)   |
| C(9)  | C(12) | C(17) | 122.5(2)   | C(9)  | C(12) | H(3)  | 118.6      |
| C(17) | C(12) | H(3)  | 118.9      | C(10) | C(13) | C(17) | 121.4(2)   |
| C(10) | C(13) | H(4)  | 119.0      | C(17) | C(13) | H(4)  | 119.6      |
| C(18) | C(14) | C(19) | 104.0(2)   | C(18) | C(14) | H(5)  | 111.1      |
| C(18) | C(14) | H(6)  | 110.2      | C(19) | C(14) | H(5)  | 111.2      |
| C(19) | C(14) | H(6)  | 110.8      | H(5)  | C(14) | H(6)  | 109.5      |
| C(16) | C(15) | C(19) | 105.24(19) | C(16) | C(15) | H(7)  | 110.2      |
| C(16) | C(15) | H(8)  | 111.0      | C(19) | C(15) | H(7)  | 108.8      |
| C(19) | C(15) | H(8)  | 112.0      | H(7)  | C(15) | H(8)  | 109.5      |
| N(6)  | C(16) | C(15) | 129.5(2)   | N(6)  | C(16) | C(18) | 121.5(2)   |
| C(15) | C(16) | C(18) | 108.9(2)   | C(12) | C(17) | C(13) | 120.6(2)   |
| C(12) | C(17) | H(2)  | 120.0      | C(13) | C(17) | H(2)  | 119.4      |
| C(14) | C(18) | C(16) | 103.2(2)   | C(14) | C(18) | H(9)  | 112.5      |
| C(14) | C(18) | H(10) | 109.9      | C(16) | C(18) | H(9)  | 112.4      |
| C(16) | C(18) | H(10) | 109.2      | H(9)  | C(18) | H(10) | 109.5      |
| C(14) | C(19) | C(15) | 104.5(2)   | C(14) | C(19) | H(11) | 110.2      |
| C(14) | C(19) | H(12) | 111.6      | C(15) | C(19) | H(11) | 108.7      |
| C(15) | C(19) | H(12) | 112.2      | H(11) | C(19) | H(12) | 109.5      |
| C(11) | C(20) | H(13) | 109.5      | C(11) | C(20) | H(14) | 109.3      |
| C(11) | C(20) | H(15) | 109.6      | H(13) | C(20) | H(14) | 109.5      |
| H(13) | C(20) | H(15) | 109.5      | H(14) | C(20) | H(15) | 109.5      |
| N(4)  | C(21) | H(16) | 109.2      | N(4)  | C(21) | H(17) | 110.0      |
| N(4)  | C(21) | H(18) | 109.2      | H(16) | C(21) | H(17) | 109.5      |
| H(16) | C(21) | H(18) | 109.5      | H(17) | C(21) | H(18) | 109.5      |

Table 4. Bond angles ( $^{\circ}$ ) (continued)

| atom | atom | atom | angle | atom | atom | atom | angle |
|------|------|------|-------|------|------|------|-------|
|------|------|------|-------|------|------|------|-------|

Table 5. Torsion Angles( $^{\circ}$ )

| atom1 | atom2 | atom3 | atom4 | angle       | atom1 | atom2 | atom3 | atom4 | angle      |
|-------|-------|-------|-------|-------------|-------|-------|-------|-------|------------|
| O(2)  | S(1)  | N(4)  | N(5)  | 59.82(18)   | O(2)  | S(1)  | N(4)  | C(21) | -76.82(19) |
| O(2)  | S(1)  | C(8)  | C(9)  | 97.33(19)   | O(2)  | S(1)  | C(8)  | C(10) | -77.67(19) |
| O(3)  | S(1)  | N(4)  | N(5)  | -171.42(15) | O(3)  | S(1)  | N(4)  | C(21) | 51.95(19)  |
| O(3)  | S(1)  | C(8)  | C(9)  | -32.9(2)    | O(3)  | S(1)  | C(8)  | C(10) | 152.07(16) |
| N(4)  | S(1)  | C(8)  | C(9)  | -146.28(18) | N(4)  | S(1)  | C(8)  | C(10) | 38.72(19)  |
| C(8)  | S(1)  | N(4)  | N(5)  | -54.40(18)  | C(8)  | S(1)  | N(4)  | C(21) | 168.96(17) |
| S(1)  | N(4)  | N(5)  | C(11) | 39.9(2)     | C(21) | N(4)  | N(5)  | C(11) | 178.1(2)   |
| N(4)  | N(5)  | C(11) | C(10) | -0.9(3)     | N(4)  | N(5)  | C(11) | C(20) | 176.8(2)   |
| N(7)  | N(6)  | C(16) | C(15) | -1.5(3)     | N(7)  | N(6)  | C(16) | C(18) | 178.8(2)   |
| C(16) | N(6)  | N(7)  | C(9)  | -170.7(2)   | N(6)  | N(7)  | C(9)  | C(8)  | 170.0(2)   |
| N(6)  | N(7)  | C(9)  | C(12) | -11.9(3)    | S(1)  | C(8)  | C(9)  | N(7)  | 7.6(3)     |
| S(1)  | C(8)  | C(9)  | C(12) | -170.69(18) | S(1)  | C(8)  | C(10) | C(11) | -11.6(2)   |
| S(1)  | C(8)  | C(10) | C(13) | 171.67(17)  | C(9)  | C(8)  | C(10) | C(11) | 173.4(2)   |
| C(9)  | C(8)  | C(10) | C(13) | -3.3(3)     | C(10) | C(8)  | C(9)  | N(7)  | -177.7(2)  |
| C(10) | C(8)  | C(9)  | C(12) | 4.0(3)      | N(7)  | C(9)  | C(12) | C(17) | 179.7(2)   |
| C(8)  | C(9)  | C(12) | C(17) | -2.1(3)     | C(8)  | C(10) | C(11) | N(5)  | -13.1(3)   |
| C(8)  | C(10) | C(11) | C(20) | 169.3(2)    | C(8)  | C(10) | C(13) | C(17) | 0.5(3)     |
| C(11) | C(10) | C(13) | C(17) | -176.1(2)   | C(13) | C(10) | C(11) | N(5)  | 163.4(2)   |
| C(13) | C(10) | C(11) | C(20) | -14.1(3)    | C(9)  | C(12) | C(17) | C(13) | -0.5(4)    |
| C(10) | C(13) | C(17) | C(12) | 1.4(3)      | C(18) | C(14) | C(19) | C(15) | -37.0(2)   |
| C(19) | C(14) | C(18) | C(16) | 35.3(2)     | C(16) | C(15) | C(19) | C(14) | 24.4(2)    |
| C(19) | C(15) | C(16) | N(6)  | 178.2(2)    | C(19) | C(15) | C(16) | C(18) | -2.0(2)    |
| N(6)  | C(16) | C(18) | C(14) | 159.5(2)    | C(15) | C(16) | C(18) | C(14) | -20.3(2)   |

The sign is positive if when looking from atom 2 to atom 3 a clock-wise motion of atom 1 would superimpose it on atom 4.



Table 6. Distances beyond the asymmetric unit out to 3.60 Å

| atom  | atom                 | distance | atom  | atom                 | distance |
|-------|----------------------|----------|-------|----------------------|----------|
| S(1)  | H(4) <sup>1)</sup>   | 3.592    | S(1)  | H(6) <sup>2)</sup>   | 3.310    |
| S(1)  | H(15) <sup>3)</sup>  | 3.569    | O(2)  | C(13) <sup>1)</sup>  | 3.463(2) |
| O(2)  | C(14) <sup>4)</sup>  | 3.379(2) | O(2)  | C(17) <sup>1)</sup>  | 3.452(3) |
| O(2)  | C(18) <sup>4)</sup>  | 3.513(3) | O(2)  | C(20) <sup>3)</sup>  | 3.481(2) |
| O(2)  | H(2) <sup>1)</sup>   | 2.873    | O(2)  | H(4) <sup>1)</sup>   | 2.887    |
| O(2)  | H(5) <sup>4)</sup>   | 2.793    | O(2)  | H(10) <sup>4)</sup>  | 2.824    |
| O(2)  | H(11) <sup>4)</sup>  | 2.980    | O(2)  | H(13) <sup>3)</sup>  | 3.403    |
| O(2)  | H(15) <sup>3)</sup>  | 2.734    | O(3)  | H(2) <sup>1)</sup>   | 3.480    |
| O(3)  | H(6) <sup>2)</sup>   | 2.785    | N(4)  | H(6) <sup>2)</sup>   | 3.013    |
| N(4)  | H(9) <sup>2)</sup>   | 3.329    | N(5)  | H(2) <sup>5)</sup>   | 3.046    |
| N(5)  | H(5) <sup>4)</sup>   | 3.205    | N(5)  | H(10) <sup>6)</sup>  | 3.054    |
| N(6)  | C(21) <sup>7)</sup>  | 3.589(3) | N(6)  | H(9) <sup>8)</sup>   | 2.781    |
| N(6)  | H(13) <sup>1)</sup>  | 3.538    | N(6)  | H(16) <sup>7)</sup>  | 3.199    |
| N(6)  | H(17) <sup>7)</sup>  | 3.113    | N(7)  | C(13) <sup>1)</sup>  | 3.494(3) |
| N(7)  | H(4) <sup>1)</sup>   | 3.360    | N(7)  | H(12) <sup>2)</sup>  | 3.545    |
| N(7)  | H(13) <sup>1)</sup>  | 3.319    | C(8)  | H(6) <sup>2)</sup>   | 3.575    |
| C(8)  | H(7) <sup>2)</sup>   | 2.975    | C(8)  | H(11) <sup>4)</sup>  | 3.232    |
| C(9)  | H(7) <sup>2)</sup>   | 2.907    | C(9)  | H(13) <sup>1)</sup>  | 3.128    |
| C(10) | H(1) <sup>2)</sup>   | 3.511    | C(10) | H(5) <sup>4)</sup>   | 3.443    |
| C(10) | H(7) <sup>2)</sup>   | 3.156    | C(10) | H(11) <sup>4)</sup>  | 3.129    |
| C(10) | H(12) <sup>4)</sup>  | 3.463    | C(11) | H(5) <sup>4)</sup>   | 2.965    |
| C(12) | H(5) <sup>8)</sup>   | 3.555    | C(12) | H(7) <sup>2)</sup>   | 3.058    |
| C(12) | H(9) <sup>8)</sup>   | 3.494    | C(12) | H(13) <sup>1)</sup>  | 2.982    |
| C(12) | H(16) <sup>7)</sup>  | 3.012    | C(13) | O(2) <sup>2)</sup>   | 3.463(2) |
| C(13) | N(7) <sup>2)</sup>   | 3.494(3) | C(13) | H(1) <sup>2)</sup>   | 3.072    |
| C(13) | H(7) <sup>2)</sup>   | 3.278    | C(13) | H(11) <sup>4)</sup>  | 3.473    |
| C(13) | H(12) <sup>4)</sup>  | 3.408    | C(14) | O(2) <sup>9)</sup>   | 3.379(2) |
| C(14) | H(3) <sup>8)</sup>   | 3.143    | C(14) | H(14) <sup>9)</sup>  | 3.565    |
| C(14) | H(16) <sup>1)</sup>  | 3.498    | C(15) | H(14) <sup>10)</sup> | 3.333    |
| C(15) | H(16) <sup>11)</sup> | 3.599    | C(15) | H(18) <sup>11)</sup> | 3.280    |
| C(16) | H(9) <sup>8)</sup>   | 3.384    | C(16) | H(17) <sup>7)</sup>  | 3.446    |
| C(17) | O(2) <sup>2)</sup>   | 3.452(3) | C(17) | H(1) <sup>2)</sup>   | 3.416    |
| C(17) | H(7) <sup>2)</sup>   | 3.250    | C(17) | H(17) <sup>12)</sup> | 3.596    |
| C(18) | O(2) <sup>9)</sup>   | 3.513(3) | C(18) | H(3) <sup>8)</sup>   | 3.082    |
| C(18) | H(9) <sup>8)</sup>   | 3.237    | C(18) | H(17) <sup>7)</sup>  | 3.570    |
| C(19) | H(14) <sup>9)</sup>  | 3.592    | C(19) | H(17) <sup>11)</sup> | 3.384    |
| C(19) | H(18) <sup>11)</sup> | 3.489    | C(20) | O(2) <sup>13)</sup>  | 3.481(2) |

Table 6. Distances beyond the asymmetric unit out to 3.60 Å (continued)

| atom  | atom                 | distance | atom  | atom                 | distance |
|-------|----------------------|----------|-------|----------------------|----------|
| C(20) | H(2) <sup>5)</sup>   | 3.568    | C(20) | H(5) <sup>4)</sup>   | 3.275    |
| C(20) | H(8) <sup>14)</sup>  | 3.285    | C(20) | H(11) <sup>14)</sup> | 3.593    |
| C(20) | H(18) <sup>13)</sup> | 3.161    | C(21) | N(6) <sup>6)</sup>   | 3.589(3) |
| C(21) | H(3) <sup>6)</sup>   | 3.454    | C(21) | H(6) <sup>2)</sup>   | 3.397    |
| C(21) | H(7) <sup>11)</sup>  | 3.492    | C(21) | H(8) <sup>11)</sup>  | 3.384    |
| C(21) | H(9) <sup>2)</sup>   | 3.445    | C(21) | H(12) <sup>11)</sup> | 3.306    |
| H(1)  | C(10) <sup>1)</sup>  | 3.511    | H(1)  | C(13) <sup>1)</sup>  | 3.072    |
| H(1)  | C(17) <sup>1)</sup>  | 3.416    | H(1)  | H(4) <sup>1)</sup>   | 3.071    |
| H(2)  | O(2) <sup>2)</sup>   | 2.873    | H(2)  | O(3) <sup>2)</sup>   | 3.480    |
| H(2)  | N(5) <sup>12)</sup>  | 3.046    | H(2)  | C(20) <sup>12)</sup> | 3.568    |
| H(2)  | H(5) <sup>8)</sup>   | 3.223    | H(2)  | H(15) <sup>12)</sup> | 2.766    |
| H(2)  | H(17) <sup>12)</sup> | 3.340    | H(3)  | C(14) <sup>8)</sup>  | 3.143    |
| H(3)  | C(18) <sup>8)</sup>  | 3.082    | H(3)  | C(21) <sup>7)</sup>  | 3.454    |
| H(3)  | H(5) <sup>8)</sup>   | 2.796    | H(3)  | H(6) <sup>8)</sup>   | 3.139    |
| H(3)  | H(7) <sup>2)</sup>   | 3.576    | H(3)  | H(9) <sup>8)</sup>   | 2.566    |
| H(3)  | H(10) <sup>8)</sup>  | 3.240    | H(3)  | H(13) <sup>1)</sup>  | 2.906    |
| H(3)  | H(16) <sup>7)</sup>  | 2.562    | H(4)  | S(1) <sup>2)</sup>   | 3.592    |
| H(4)  | O(2) <sup>2)</sup>   | 2.887    | H(4)  | N(7) <sup>2)</sup>   | 3.360    |
| H(4)  | H(1) <sup>2)</sup>   | 3.071    | H(4)  | H(10) <sup>14)</sup> | 3.498    |
| H(4)  | H(11) <sup>14)</sup> | 3.121    | H(4)  | H(12) <sup>4)</sup>  | 3.420    |
| H(5)  | O(2) <sup>9)</sup>   | 2.793    | H(5)  | N(5) <sup>9)</sup>   | 3.205    |
| H(5)  | C(10) <sup>9)</sup>  | 3.443    | H(5)  | C(11) <sup>9)</sup>  | 2.965    |
| H(5)  | C(12) <sup>8)</sup>  | 3.555    | H(5)  | C(20) <sup>9)</sup>  | 3.275    |
| H(5)  | H(2) <sup>8)</sup>   | 3.223    | H(5)  | H(3) <sup>8)</sup>   | 2.796    |
| H(5)  | H(14) <sup>9)</sup>  | 3.182    | H(5)  | H(15) <sup>9)</sup>  | 3.100    |
| H(6)  | S(1) <sup>1)</sup>   | 3.310    | H(6)  | O(3) <sup>1)</sup>   | 2.785    |
| H(6)  | N(4) <sup>1)</sup>   | 3.013    | H(6)  | C(8) <sup>1)</sup>   | 3.575    |
| H(6)  | C(21) <sup>1)</sup>  | 3.397    | H(6)  | H(3) <sup>8)</sup>   | 3.139    |
| H(6)  | H(14) <sup>9)</sup>  | 3.483    | H(6)  | H(15) <sup>9)</sup>  | 3.572    |
| H(6)  | H(16) <sup>1)</sup>  | 2.836    | H(7)  | C(8) <sup>1)</sup>   | 2.975    |
| H(7)  | C(9) <sup>1)</sup>   | 2.907    | H(7)  | C(10) <sup>1)</sup>  | 3.156    |
| H(7)  | C(12) <sup>1)</sup>  | 3.058    | H(7)  | C(13) <sup>1)</sup>  | 3.278    |
| H(7)  | C(17) <sup>1)</sup>  | 3.250    | H(7)  | C(21) <sup>11)</sup> | 3.492    |
| H(7)  | H(3) <sup>1)</sup>   | 3.576    | H(7)  | H(16) <sup>11)</sup> | 3.164    |
| H(7)  | H(17) <sup>11)</sup> | 3.474    | H(7)  | H(18) <sup>11)</sup> | 3.273    |
| H(8)  | C(20) <sup>10)</sup> | 3.285    | H(8)  | C(21) <sup>11)</sup> | 3.384    |
| H(8)  | H(13) <sup>10)</sup> | 3.478    | H(8)  | H(14) <sup>10)</sup> | 2.525    |

Table 6. Distances beyond the asymmetric unit out to 3.60 Å (continued)

| atom  | atom                 | distance | atom  | atom                 | distance |
|-------|----------------------|----------|-------|----------------------|----------|
| H(8)  | H(15) <sup>10j</sup> | 3.430    | H(8)  | H(16) <sup>11j</sup> | 3.362    |
| H(8)  | H(17) <sup>11j</sup> | 3.531    | H(8)  | H(18) <sup>11j</sup> | 2.766    |
| H(9)  | N(4) <sup>1j</sup>   | 3.329    | H(9)  | N(6) <sup>8j</sup>   | 2.781    |
| H(9)  | C(12) <sup>8j</sup>  | 3.494    | H(9)  | C(16) <sup>8j</sup>  | 3.384    |
| H(9)  | C(18) <sup>8j</sup>  | 3.237    | H(9)  | C(21) <sup>1j</sup>  | 3.445    |
| H(9)  | H(3) <sup>8j</sup>   | 2.566    | H(9)  | H(9) <sup>8j</sup>   | 2.586    |
| H(9)  | H(10) <sup>8j</sup>  | 3.481    | H(9)  | H(16) <sup>1j</sup>  | 2.948    |
| H(9)  | H(17) <sup>1j</sup>  | 3.564    | H(10) | O(2) <sup>9j</sup>   | 2.824    |
| H(10) | N(5) <sup>7j</sup>   | 3.054    | H(10) | H(3) <sup>8j</sup>   | 3.240    |
| H(10) | H(4) <sup>10j</sup>  | 3.498    | H(10) | H(9) <sup>8j</sup>   | 3.481    |
| H(10) | H(13) <sup>7j</sup>  | 3.528    | H(10) | H(15) <sup>7j</sup>  | 3.568    |
| H(10) | H(17) <sup>7j</sup>  | 3.005    | H(11) | O(2) <sup>9j</sup>   | 2.980    |
| H(11) | C(8) <sup>9j</sup>   | 3.232    | H(11) | C(10) <sup>9j</sup>  | 3.129    |
| H(11) | C(13) <sup>9j</sup>  | 3.473    | H(11) | C(20) <sup>10j</sup> | 3.593    |
| H(11) | H(4) <sup>10j</sup>  | 3.121    | H(11) | H(13) <sup>10j</sup> | 3.241    |
| H(11) | H(14) <sup>10j</sup> | 3.056    | H(11) | H(17) <sup>11j</sup> | 3.515    |
| H(11) | H(18) <sup>11j</sup> | 3.436    | H(12) | N(7) <sup>1j</sup>   | 3.545    |
| H(12) | C(10) <sup>9j</sup>  | 3.463    | H(12) | C(13) <sup>9j</sup>  | 3.408    |
| H(12) | C(21) <sup>11j</sup> | 3.306    | H(12) | H(4) <sup>9j</sup>   | 3.420    |
| H(12) | H(14) <sup>9j</sup>  | 3.020    | H(12) | H(16) <sup>11j</sup> | 3.483    |
| H(12) | H(17) <sup>11j</sup> | 2.725    | H(12) | H(18) <sup>11j</sup> | 3.221    |
| H(13) | O(2) <sup>13j</sup>  | 3.403    | H(13) | N(6) <sup>2j</sup>   | 3.538    |
| H(13) | N(7) <sup>2j</sup>   | 3.319    | H(13) | C(9) <sup>2j</sup>   | 3.128    |
| H(13) | C(12) <sup>2j</sup>  | 2.982    | H(13) | H(3) <sup>2j</sup>   | 2.906    |
| H(13) | H(8) <sup>14j</sup>  | 3.478    | H(13) | H(10) <sup>6j</sup>  | 3.528    |
| H(13) | H(11) <sup>14j</sup> | 3.241    | H(13) | H(18) <sup>13j</sup> | 2.992    |
| H(14) | C(14) <sup>4j</sup>  | 3.565    | H(14) | C(15) <sup>14j</sup> | 3.333    |
| H(14) | C(19) <sup>4j</sup>  | 3.592    | H(14) | H(5) <sup>4j</sup>   | 3.182    |
| H(14) | H(6) <sup>4j</sup>   | 3.483    | H(14) | H(8) <sup>14j</sup>  | 2.525    |
| H(14) | H(11) <sup>14j</sup> | 3.056    | H(14) | H(12) <sup>4j</sup>  | 3.020    |
| H(14) | H(18) <sup>13j</sup> | 3.176    | H(15) | S(1) <sup>13j</sup>  | 3.569    |
| H(15) | O(2) <sup>13j</sup>  | 2.734    | H(15) | H(2) <sup>5j</sup>   | 2.766    |
| H(15) | H(5) <sup>4j</sup>   | 3.100    | H(15) | H(6) <sup>4j</sup>   | 3.572    |
| H(15) | H(8) <sup>14j</sup>  | 3.430    | H(15) | H(10) <sup>6j</sup>  | 3.568    |
| H(15) | H(18) <sup>13j</sup> | 2.793    | H(16) | N(6) <sup>6j</sup>   | 3.199    |
| H(16) | C(12) <sup>6j</sup>  | 3.012    | H(16) | C(14) <sup>2j</sup>  | 3.498    |
| H(16) | C(15) <sup>11j</sup> | 3.599    | H(16) | H(3) <sup>6j</sup>   | 2.562    |

Table 6. Distances beyond the asymmetric unit out to 3.60 Å (continued)

| atom  | atom                 | distance | atom  | atom                 | distance |
|-------|----------------------|----------|-------|----------------------|----------|
| H(16) | H(6) <sup>2)</sup>   | 2.836    | H(16) | H(7) <sup>11)</sup>  | 3.164    |
| H(16) | H(8) <sup>11)</sup>  | 3.362    | H(16) | H(9) <sup>2)</sup>   | 2.948    |
| H(16) | H(12) <sup>11)</sup> | 3.483    | H(17) | N(6) <sup>6)</sup>   | 3.113    |
| H(17) | C(16) <sup>6)</sup>  | 3.446    | H(17) | C(17) <sup>5)</sup>  | 3.596    |
| H(17) | C(18) <sup>6)</sup>  | 3.570    | H(17) | C(19) <sup>11)</sup> | 3.384    |
| H(17) | H(2) <sup>5)</sup>   | 3.340    | H(17) | H(7) <sup>11)</sup>  | 3.474    |
| H(17) | H(8) <sup>11)</sup>  | 3.531    | H(17) | H(9) <sup>2)</sup>   | 3.564    |
| H(17) | H(10) <sup>6)</sup>  | 3.005    | H(17) | H(11) <sup>11)</sup> | 3.515    |
| H(17) | H(12) <sup>11)</sup> | 2.725    | H(18) | C(15) <sup>11)</sup> | 3.280    |
| H(18) | C(19) <sup>11)</sup> | 3.489    | H(18) | C(20) <sup>3)</sup>  | 3.161    |
| H(18) | H(7) <sup>11)</sup>  | 3.273    | H(18) | H(8) <sup>11)</sup>  | 2.766    |
| H(18) | H(11) <sup>11)</sup> | 3.436    | H(18) | H(12) <sup>11)</sup> | 3.221    |
| H(18) | H(13) <sup>3)</sup>  | 2.992    | H(18) | H(14) <sup>3)</sup>  | 3.176    |
| H(18) | H(15) <sup>3)</sup>  | 2.793    |       |                      |          |

Symmetry Operators:

- |                         |                         |
|-------------------------|-------------------------|
| (1) -X+1/2,Y+1/2-1,Z    | (2) -X+1/2,Y+1/2,Z      |
| (3) -X,Y+1/2-1,-Z+1/2+1 | (4) -X+1/2,-Y,Z+1/2     |
| (5) X+1/2-1,Y,-Z+1/2+1  | (6) X+1/2-1,-Y+1/2,-Z+1 |
| (7) X+1/2,-Y+1/2,-Z+1   | (8) -X+1,-Y,-Z+1        |
| (9) -X+1/2,-Y,Z+1/2-1   | (10) X,-Y+1/2,Z+1/2-1   |
| (11) -X,-Y,-Z+1         | (12) X+1/2,Y,-Z+1/2+1   |
| (13) -X,Y+1/2,-Z+1/2+1  | (14) X,-Y+1/2,Z+1/2     |

Table 7. Intramolecular and Intermolecular Hydrogen bonds

| D    | H    | A    | D...A    | D-H   | H...A | D-H...A |
|------|------|------|----------|-------|-------|---------|
| N(7) | H(1) | O(3) | 2.801(2) | 0.950 | 2.104 | 129.0   |

- Note) 1. The symmetry operations are applied to the acceptors.  
2. Estimated standard deviations (esd's) are shown in the parentheses.  
They are not calculated when all atoms have an esd=0.0.
