# Supplementary material for: Thiadiazino-indole, thiadiazino-carbazole and benzothiadiazino-carbazole dioxides: synthesis, physicochemical and early ADME characterization of representatives of new tri-, tetra- and pentacyclic ring systems and their intermediates
Source: publisher site journal article supplement (doi:10.3762/bjoc.21.169), 2025-10-21
Supplement: Additional file 2 [file 7e_xrd.pdf › Átnevezett XRD/7e_xrd.pdf]

**142695**

**PGY0537\_1A**

Submitted by: Pusztai Gyongyver  
Operator: Dancso Andras

X-ray Structure Report

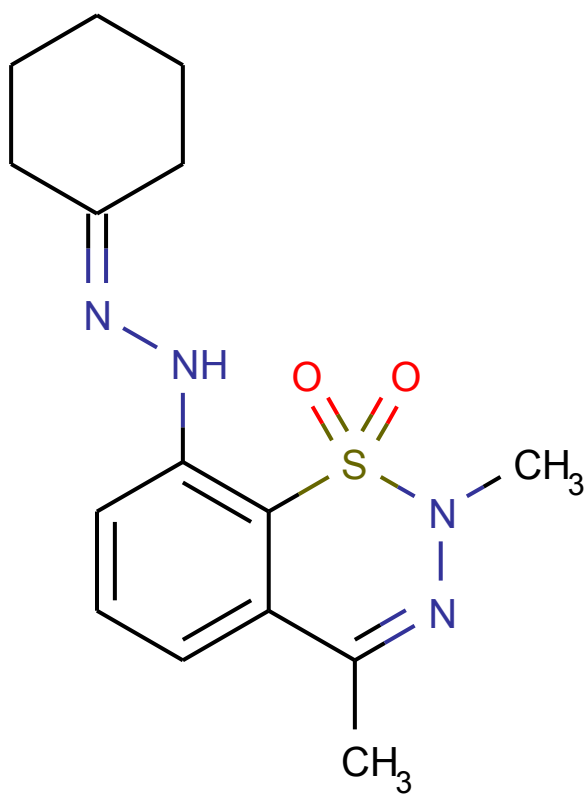

January 10, 2025

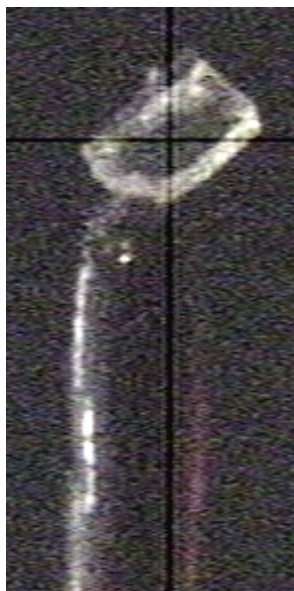

Fig. 1. The crystal

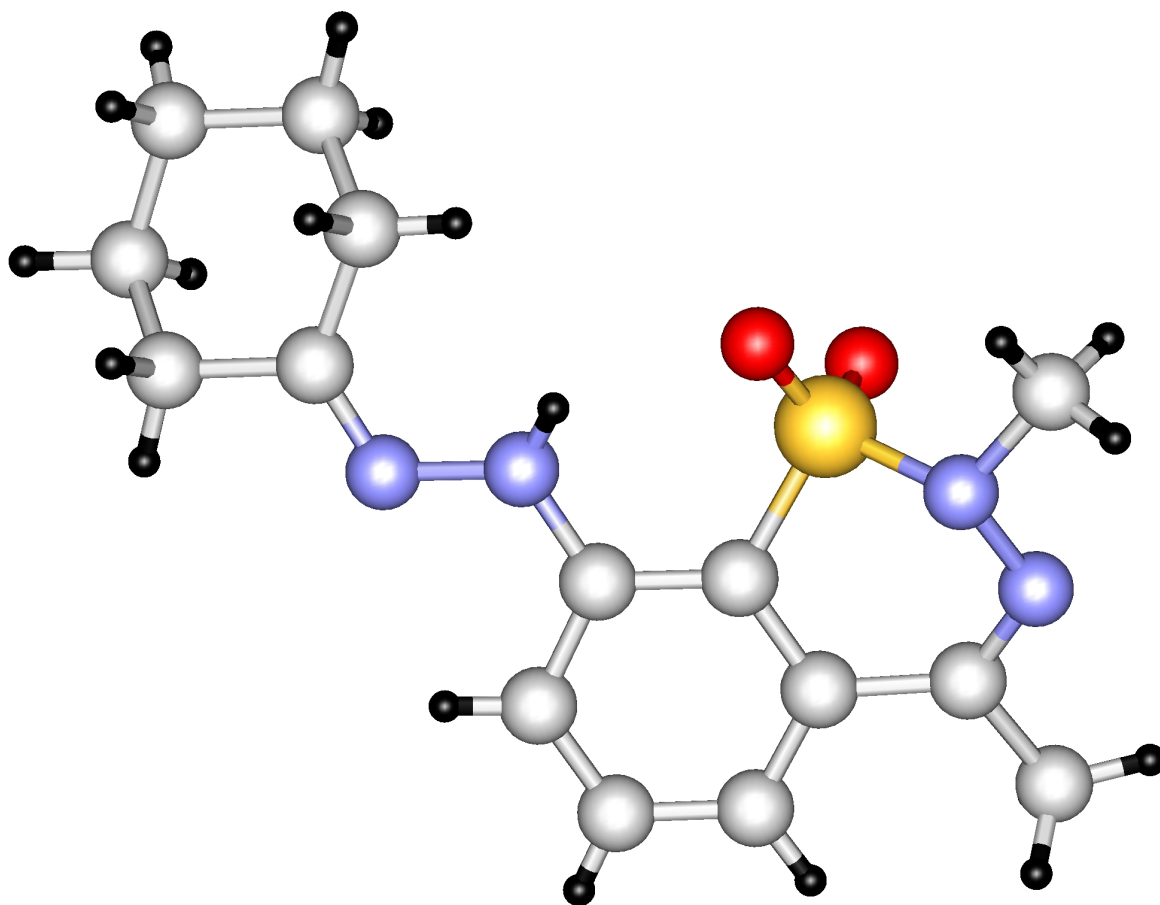

Fig. 2. The molecule

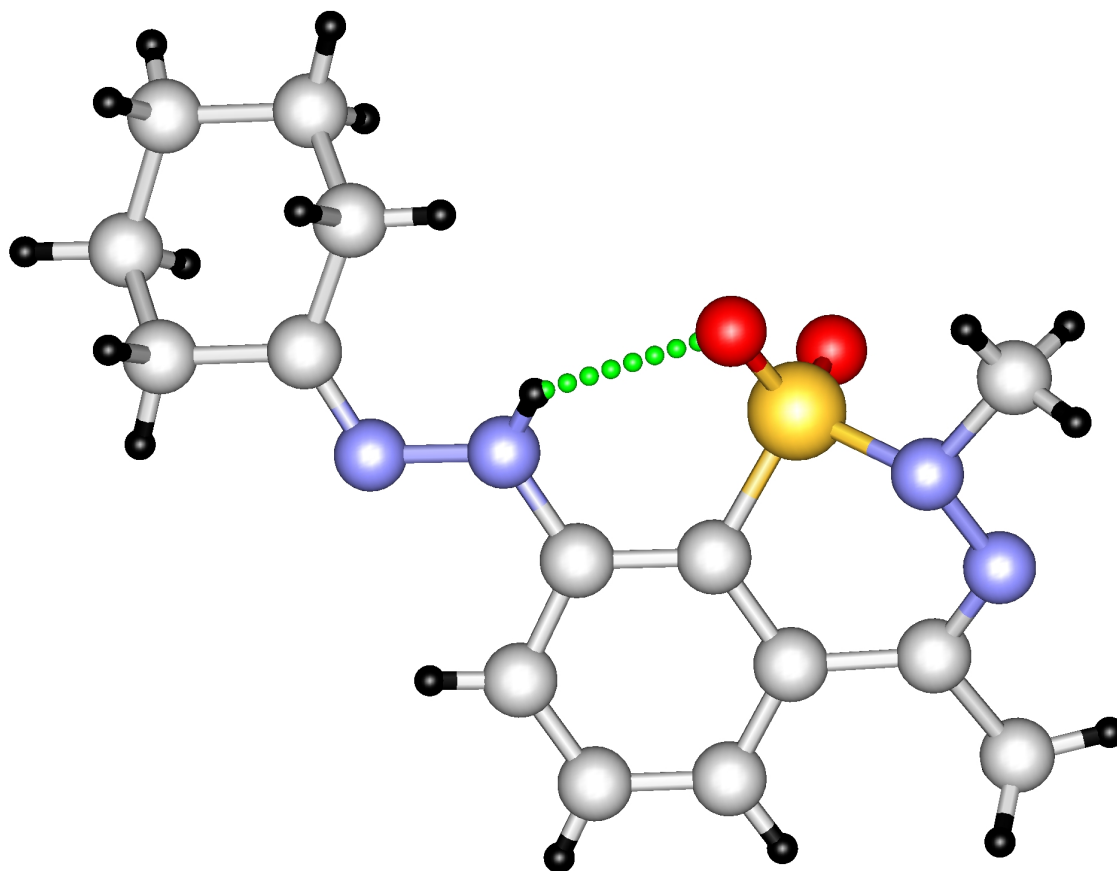

Fig. 3. Hydrogen bond

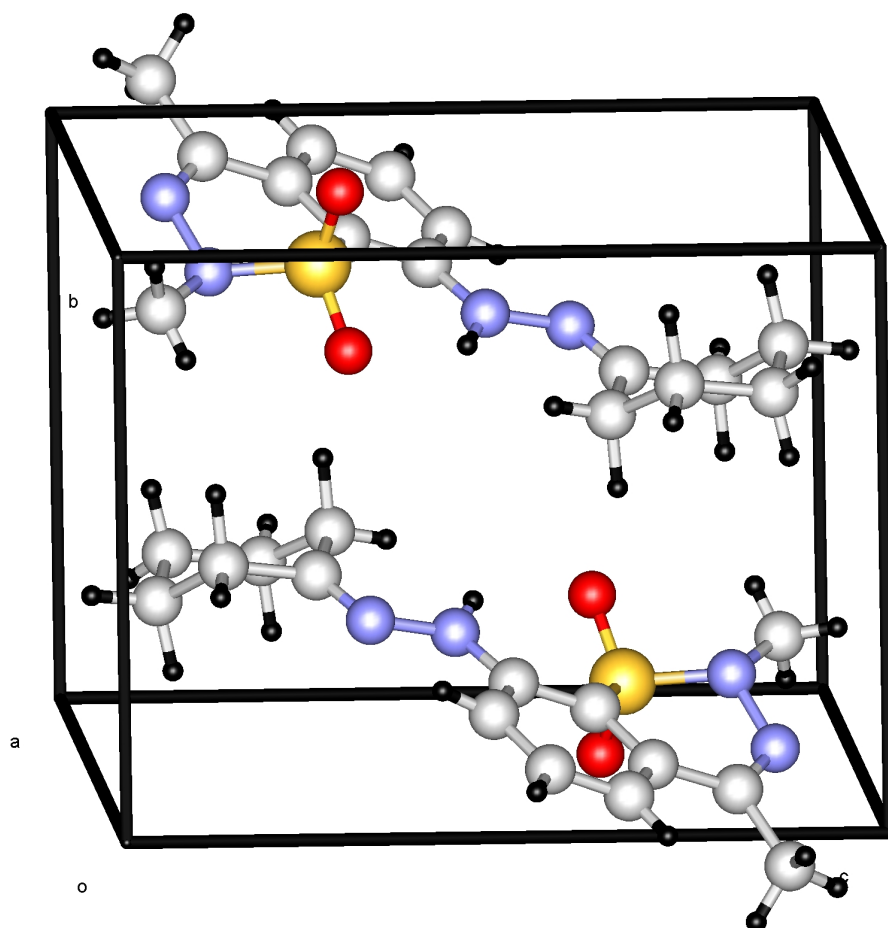

Fig. 4. Packing

## *Experimental*

### Data Collection

A colorless prism crystal of  $C_{15}H_{20}N_4O_2S$  having approximate dimensions of 0.23 x 0.12 x 0.04 mm was mounted on a cactus needle. All measurements were made on a Rigaku RAXIS RAPID imaging plate area detector with graphite monochromated Cu-K $\alpha$  radiation.

Indexing was performed from 4 oscillations that were exposed for 900 seconds. The crystal-to-detector distance was 127.40 mm.

Cell constants and an orientation matrix for data collection corresponded to a primitive triclinic cell with dimensions:

$$\begin{aligned}a &= 7.8403(5) \text{ \AA} & \alpha &= 88.044(5)^\circ \\b &= 8.8939(6) \text{ \AA} & \beta &= 75.471(5)^\circ \\c &= 12.5035(9) \text{ \AA} & \gamma &= 68.340(4)^\circ \\V &= 782.74(9) \text{ \AA}^3\end{aligned}$$

For  $Z = 2$  and F.W. = 320.41, the calculated density is 1.359 g/cm<sup>3</sup>. Based on a statistical analysis of intensity distribution, and the successful solution and refinement of the structure, the space group was determined to be:

### P-1 (#2)

The data were collected at a temperature of  $20 \pm 1^\circ\text{C}$  to a maximum  $2\theta$  value of  $143.2^\circ$ . A total of 216 oscillation images were collected. A sweep of data was done using  $\omega$  scans from  $20.0$  to  $200.0^\circ$  in  $5.0^\circ$  step, at  $\chi=0.0^\circ$  and  $\phi = 0.0^\circ$ . The exposure rate was 180.0 [sec./ $^\circ$ ]. A second sweep was performed using  $\omega$  scans from  $20.0$  to  $200.0^\circ$  in  $5.0^\circ$  step, at  $\chi=54.0^\circ$  and  $\phi = 0.0^\circ$ . The exposure rate was 180.0 [sec./ $^\circ$ ]. Another sweep was performed using  $\omega$  scans from  $20.0$  to  $200.0^\circ$  in  $5.0^\circ$  step, at  $\chi=54.0^\circ$  and  $\phi = 90.0^\circ$ . The exposure rate was 180.0 [sec./ $^\circ$ ]. Another sweep was performed using  $\omega$  scans from  $20.0$  to  $200.0^\circ$  in  $5.0^\circ$  step, at  $\chi=54.0^\circ$  and  $\phi = 90.0^\circ$ . The exposure rate was 180.0 [sec./ $^\circ$ ]. Another sweep was performed using  $\omega$  scans from  $20.0$  to  $200.0^\circ$  in  $5.0^\circ$  step, at  $\chi=54.0^\circ$  and  $\phi = 180.0^\circ$ . The exposure rate was 180.0 [sec./ $^\circ$ ]. Another sweep was performed using  $\omega$  scans from  $20.0$  to  $200.0^\circ$  in  $5.0^\circ$  step, at  $\chi=54.0^\circ$  and  $\phi = 270.0^\circ$ . The exposure rate was 180.0 [sec./ $^\circ$ ]. The crystal-to-detector distance was 127.40 mm. Readout was performed in the 0.100 mm pixel mode.

## Data Reduction

Of the 10710 reflections that were collected, 2706 were unique ( $R_{\text{int}} = 0.041$ ).

The linear absorption coefficient,  $\mu$ , for Cu-K $\alpha$  radiation is 19.501 cm<sup>-1</sup>. An empirical absorption correction was applied which resulted in transmission factors ranging from 0.487 to 0.677. The data were corrected for Lorentz and polarization effects.

## Structure Solution and Refinement

The structure was solved by direct methods<sup>1</sup> and expanded using Fourier techniques<sup>2</sup>. The non-hydrogen atoms were refined anisotropically. Hydrogen atoms were refined isotropically. The final cycle of full-matrix least-squares refinement<sup>3</sup> on F was based on 9078 observed reflections ( $I > 2.00\sigma(I)$ ) and 279 variable parameters and converged (largest parameter shift was 0.00 times its esd) with unweighted and weighted agreement factors of:

$$R = \sum ||F_o| - |F_c|| / \sum |F_o| = 0.0505$$

$$R_w = [ \sum w (|F_o| - |F_c|)^2 / \sum w F_o^2 ]^{1/2} = 0.0522$$

The standard deviation of an observation of unit weight<sup>4</sup> was 5.24. Unit weights were used. Plots of  $\sum w (|F_o| - |F_c|)^2$  versus  $|F_o|$ , reflection order in data collection,  $\sin \theta/\lambda$  and various classes of indices showed no unusual trends. The maximum and minimum peaks on the final difference Fourier map corresponded to 3.66 and -2.33 e<sup>-</sup>/Å<sup>3</sup>, respectively.

Neutral atom scattering factors were taken from Cromer and Waber<sup>5</sup>. Anomalous dispersion effects were included in Fcalc<sup>6</sup>; the values for  $\Delta f'$  and  $\Delta f''$  were those of Creagh and McAuley<sup>7</sup>. The values for the mass attenuation coefficients are those of Creagh and Hubbell<sup>8</sup>. All calculations were performed using the CrystalStructure<sup>9,10</sup> crystallographic software package.

## *References*

- (1) SIR92: Altomare, A., Cascarano, G., Giacovazzo, C., Guagliardi, A., Burla, M., Polidori, G., and Camalli, M. (1994) J. Appl. Cryst., 27, 435.
- (2) DIRDIF99: Beurskens, P.T., Admiraal, G., Beurskens, G., Bosman, W.P., de Gelder, R., Israel, R. and Smits, J.M.M.(1999). The DIRDIF-99 program system, Technical Report of the Crystallography Laboratory, University of Nijmegen, The Netherlands.

(3) Least Squares function minimized:

$$\sum w(|F_o| - |F_c|)^2 \quad \text{where } w = \text{Least Squares weights.}$$

(4) Standard deviation of an observation of unit weight:

$$[\sum w(|F_o| - |F_c|)^2 / (N_o - N_v)]^{1/2}$$

where:  $N_o$  = number of observations

$N_v$  = number of variables

(5) Cromer, D. T. & Waber, J. T.; "International Tables for X-ray Crystallography", Vol. IV, The Kynoch Press, Birmingham, England, Table 2.2 A (1974).

(6) Ibers, J. A. & Hamilton, W. C.; Acta Crystallogr., 17, 781 (1964).

(7) Creagh, D. C. & McAuley, W.J. ; "International Tables for Crystallography", Vol C, (A.J.C. Wilson, ed.), Kluwer Academic Publishers, Boston, Table 4.2.6.8, pages 219-222 (1992).

(8) Creagh, D. C. & Hubbell, J.H.; "International Tables for Crystallography", Vol C, (A.J.C. Wilson, ed.), Kluwer Academic Publishers, Boston, Table 4.2.4.3, pages 200-206 (1992).

(9) CrystalStructure 3.7.0: Crystal Structure Analysis Package, Rigaku and Rigaku/MSK (2000-2005). 9009 New Trails Dr. The Woodlands TX 77381 USA.

(10) CRYSTALS Issue 10: Watkin, D.J., Prout, C.K. Carruthers, J.R. & Betteridge, P.W. Chemical Crystallography Laboratory, Oxford, UK. (1996)



## EXPERIMENTAL DETAILS

### A. Crystal Data

|                         |                                                                                                                                                                                                                      |
|-------------------------|----------------------------------------------------------------------------------------------------------------------------------------------------------------------------------------------------------------------|
| Empirical Formula       | $C_{15}H_{20}N_4O_2S$                                                                                                                                                                                                |
| Formula Weight          | 320.41                                                                                                                                                                                                               |
| Crystal Color, Habit    | colorless, prism                                                                                                                                                                                                     |
| Crystal Dimensions      | 0.23 X 0.12 X 0.04 mm                                                                                                                                                                                                |
| Crystal System          | triclinic                                                                                                                                                                                                            |
| Lattice Type            | Primitive                                                                                                                                                                                                            |
| Indexing Images         | 4 oscillations @ 900.0 seconds                                                                                                                                                                                       |
| Detector Position       | 127.40 mm                                                                                                                                                                                                            |
| Pixel Size              | 0.100 mm                                                                                                                                                                                                             |
| Lattice Parameters      | $a = 7.8403(5) \text{ \AA}$<br>$b = 8.8939(6) \text{ \AA}$<br>$c = 12.5035(9) \text{ \AA}$<br>$\alpha = 88.044(5)^\circ$<br>$\beta = 75.471(5)^\circ$<br>$\gamma = 68.340(4)^\circ$<br>$V = 782.74(9) \text{ \AA}^3$ |
| Space Group             | P-1 (#2)                                                                                                                                                                                                             |
| Z value                 | 2                                                                                                                                                                                                                    |
| $D_{\text{calc}}$       | $1.359 \text{ g/cm}^3$                                                                                                                                                                                               |
| $F_{000}$               | 340.00                                                                                                                                                                                                               |
| $\mu(\text{CuK}\alpha)$ | $19.501 \text{ cm}^{-1}$                                                                                                                                                                                             |

## B. Intensity Measurements

|                                                           |                                                                    |
|-----------------------------------------------------------|--------------------------------------------------------------------|
| Diffractometer                                            | Rigaku RAXIS-RAPID                                                 |
| Radiation                                                 | CuK $\alpha$ ( $\lambda$ = 1.54187 Å)<br>graphite monochromated    |
| Detector Aperture                                         | 280 mm x 256 mm                                                    |
| Data Images                                               | 216 exposures                                                      |
| $\omega$ oscillation Range ( $\chi$ =0.0, $\phi$ =0.0)    | 20.0 - 200.0 $^{\circ}$                                            |
| Exposure Rate                                             | 180.0 sec./ $^{\circ}$                                             |
| $\omega$ oscillation Range ( $\chi$ =54.0, $\phi$ =0.0)   | 20.0 - 200.0 $^{\circ}$                                            |
| Exposure Rate                                             | 180.0 sec./ $^{\circ}$                                             |
| $\omega$ oscillation Range ( $\chi$ =54.0, $\phi$ =90.0)  | 20.0 - 200.0 $^{\circ}$                                            |
| Exposure Rate                                             | 180.0 sec./ $^{\circ}$                                             |
| $\omega$ oscillation Range ( $\chi$ =54.0, $\phi$ =90.0)  | 20.0 - 200.0 $^{\circ}$                                            |
| Exposure Rate                                             | 180.0 sec./ $^{\circ}$                                             |
| $\omega$ oscillation Range ( $\chi$ =54.0, $\phi$ =180.0) | 20.0 - 200.0 $^{\circ}$                                            |
| Exposure Rate                                             | 180.0 sec./ $^{\circ}$                                             |
| $\omega$ oscillation Range ( $\chi$ =54.0, $\phi$ =270.0) | 20.0 - 200.0 $^{\circ}$                                            |
| Exposure Rate                                             | 180.0 sec./ $^{\circ}$                                             |
| Detector Position                                         | 127.40 mm                                                          |
| Pixel Size                                                | 0.100 mm                                                           |
| $2\theta_{\max}$                                          | 143.2 $^{\circ}$                                                   |
| No. of Reflections Measured                               | Total: 10710<br>Unique: 2706 ( $R_{\text{int}}$ = 0.041)           |
| Corrections                                               | Lorentz-polarization<br>Absorption (trans. factors: 0.487 - 0.677) |

### C. Structure Solution and Refinement

|                                          |                                |
|------------------------------------------|--------------------------------|
| Structure Solution                       | Direct Methods (SIR92)         |
| Refinement                               | Full-matrix least-squares on F |
| Function Minimized                       | $\Sigma w ( Fo  -  Fc )^2$     |
| Least Squares Weights                    | 1                              |
| $2\theta_{\text{max}}$ cutoff            | 143.2 $^{\circ}$               |
| Anomalous Dispersion                     | All non-hydrogen atoms         |
| No. Observations ( $I > 2.00\sigma(I)$ ) | 9078                           |
| No. Variables                            | 279                            |
| Reflection/Parameter Ratio               | 32.54                          |
| Residuals: R ( $I > 2.00\sigma(I)$ )     | 0.0505                         |
| Residuals: Rw ( $I > 2.00\sigma(I)$ )    | 0.0522                         |
| Goodness of Fit Indicator                | 5.239                          |
| Max Shift/Error in Final Cycle           | 0.000                          |
| Maximum peak in Final Diff. Map          | 3.66 e $^{-}/\text{\AA}^3$     |
| Minimum peak in Final Diff. Map          | -2.33 e $^{-}/\text{\AA}^3$    |

Table 1. Atomic coordinates and  $B_{\text{iso}}/B_{\text{eq}}$

| atom  | x           | y           | z           | $B_{\text{eq}}$ |
|-------|-------------|-------------|-------------|-----------------|
| S(1)  | 0.23075(8)  | 0.20671(6)  | 0.67302(5)  | 3.379(14)       |
| O(2)  | 0.37688(19) | 0.04720(17) | 0.65477(12) | 4.34(4)         |
| O(3)  | 0.2871(2)   | 0.34178(17) | 0.63937(12) | 4.15(4)         |
| N(4)  | 0.1690(2)   | 0.3324(2)   | 0.33819(17) | 3.78(5)         |
| N(5)  | 0.1661(2)   | 0.3106(2)   | 0.44877(18) | 3.91(5)         |
| N(6)  | 0.0246(2)   | 0.1407(2)   | 0.85422(14) | 3.81(5)         |
| N(7)  | 0.1126(2)   | 0.2470(2)   | 0.80573(14) | 3.80(5)         |
| C(8)  | -0.0807(2)  | 0.1420(2)   | 0.68498(18) | 2.86(5)         |
| C(9)  | 0.4499(3)   | 0.4161(3)   | 0.3104(2)   | 4.22(7)         |
| C(10) | 0.2951(3)   | 0.3795(2)   | 0.2788(2)   | 3.53(6)         |
| C(11) | 0.0440(2)   | 0.2088(2)   | 0.62050(18) | 2.73(5)         |
| C(12) | 0.0355(2)   | 0.2557(2)   | 0.51343(19) | 3.08(5)         |
| C(13) | -0.2179(3)  | 0.1224(2)   | 0.6412(2)   | 3.58(6)         |
| C(14) | -0.0656(2)  | 0.0938(2)   | 0.7967(2)   | 3.27(5)         |
| C(15) | -0.2300(3)  | 0.1725(2)   | 0.5374(2)   | 4.10(6)         |
| C(16) | 0.6442(3)   | 0.3180(3)   | 0.2362(2)   | 4.42(7)         |
| C(17) | 0.4922(4)   | 0.2897(3)   | 0.0863(2)   | 4.66(7)         |
| C(18) | -0.1621(4)  | -0.0147(3)  | 0.8551(2)   | 4.76(8)         |
| C(19) | -0.1101(3)  | 0.2378(3)   | 0.4747(2)   | 3.94(6)         |
| C(20) | 0.2985(4)   | 0.3967(3)   | 0.1575(2)   | 4.33(7)         |
| C(21) | 0.6484(4)   | 0.3324(4)   | 0.1133(2)   | 4.96(8)         |
| C(22) | 0.2155(7)   | 0.2844(6)   | 0.8784(3)   | 6.53(12)        |
| H(1)  | -0.296(2)   | 0.073(2)    | 0.6845(15)  | 2.8(4)          |
| H(2)  | -0.318(2)   | 0.156(2)    | 0.5119(15)  | 3.8(5)          |
| H(3)  | -0.119(2)   | 0.282(2)    | 0.4071(16)  | 3.7(5)          |
| H(4)  | 0.224(3)    | 0.350(2)    | 0.4779(18)  | 5.1(6)          |
| H(5)  | 0.256(3)    | 0.529(2)    | 0.1452(18)  | 6.9(6)          |
| H(6)  | 0.195(2)    | 0.368(2)    | 0.1446(16)  | 4.8(5)          |
| H(7)  | 0.521(2)    | 0.163(2)    | 0.1080(17)  | 6.0(6)          |
| H(8)  | 0.498(2)    | 0.299(2)    | 0.0008(19)  | 6.4(6)          |
| H(9)  | 0.623(2)    | 0.448(2)    | 0.0919(18)  | 5.4(6)          |
| H(10) | 0.778(3)    | 0.258(2)    | 0.074(2)    | 7.9(8)          |
| H(11) | 0.738(2)    | 0.358(2)    | 0.2530(16)  | 5.1(5)          |
| H(12) | 0.683(2)    | 0.188(2)    | 0.2517(18)  | 6.5(6)          |
| H(13) | 0.410(3)    | 0.551(3)    | 0.2994(19)  | 8.0(7)          |
| H(14) | 0.453(2)    | 0.400(2)    | 0.3847(17)  | 4.7(5)          |
| H(15) | 0.133(3)    | 0.319(3)    | 0.947(2)    | 8.6(10)         |

Table 1. Atomic coordinates and  $B_{\text{iso}}/B_{\text{eq}}$  (continued)

| atom  | x         | y         | z          | $B_{\text{eq}}$ |
|-------|-----------|-----------|------------|-----------------|
| H(16) | 0.252(3)  | 0.362(3)  | 0.850(2)   | 7.4(9)          |
| H(17) | 0.321(4)  | 0.186(3)  | 0.895(2)   | 11.5(12)        |
| H(18) | -0.122(3) | -0.062(3) | 0.921(2)   | 8.3(8)          |
| H(19) | -0.298(3) | 0.035(2)  | 0.864(2)   | 7.4(8)          |
| H(20) | -0.129(2) | -0.118(2) | 0.8128(18) | 5.4(6)          |

$$B_{\text{eq}} = 8/3 \pi^2 (U_{11}(aa^*)^2 + U_{22}(bb^*)^2 + U_{33}(cc^*)^2 + 2U_{12}(aa^*bb^*)\cos \gamma + 2U_{13}(aa^*cc^*)\cos \beta + 2U_{23}(bb^*cc^*)\cos \alpha)$$

Table 2. Anisotropic displacement parameters

| atom  | U <sub>11</sub> | U <sub>22</sub> | U <sub>33</sub> | U <sub>12</sub> | U <sub>13</sub> | U <sub>23</sub> |
|-------|-----------------|-----------------|-----------------|-----------------|-----------------|-----------------|
| S(1)  | 0.0389(3)       | 0.0546(3)       | 0.0432(4)       | -0.0258(2)      | -0.0124(2)      | 0.0044(2)       |
| O(2)  | 0.0367(8)       | 0.0570(10)      | 0.0671(12)      | -0.0135(8)      | -0.0121(8)      | 0.0051(8)       |
| O(3)  | 0.0609(10)      | 0.0669(10)      | 0.0507(11)      | -0.0460(8)      | -0.0180(8)      | 0.0141(8)       |
| N(4)  | 0.0501(12)      | 0.0586(12)      | 0.0343(14)      | -0.0206(10)     | -0.0097(11)     | 0.0064(10)      |
| N(5)  | 0.0572(14)      | 0.0670(14)      | 0.0330(14)      | -0.0338(11)     | -0.0108(12)     | 0.0065(11)      |
| N(6)  | 0.0486(11)      | 0.0629(12)      | 0.0385(13)      | -0.0308(10)     | -0.0048(10)     | 0.0033(10)      |
| N(7)  | 0.0557(12)      | 0.0665(13)      | 0.0346(13)      | -0.0373(11)     | -0.0101(10)     | -0.0003(10)     |
| C(8)  | 0.0332(12)      | 0.0369(12)      | 0.0358(15)      | -0.0144(10)     | -0.0014(11)     | -0.0021(10)     |
| C(9)  | 0.0668(19)      | 0.0661(19)      | 0.0358(18)      | -0.0338(15)     | -0.0141(15)     | 0.0059(14)      |
| C(10) | 0.0508(15)      | 0.0428(13)      | 0.0352(16)      | -0.0127(12)     | -0.0090(13)     | 0.0041(11)      |
| C(11) | 0.0307(11)      | 0.0418(12)      | 0.0316(14)      | -0.0159(10)     | -0.0047(11)     | -0.0008(10)     |
| C(12) | 0.0341(12)      | 0.0431(13)      | 0.0358(15)      | -0.0143(10)     | -0.0014(11)     | -0.0027(11)     |
| C(13) | 0.0317(13)      | 0.0544(15)      | 0.0510(19)      | -0.0220(12)     | -0.0026(13)     | -0.0032(13)     |
| C(14) | 0.0327(12)      | 0.0446(13)      | 0.0423(16)      | -0.0171(11)     | 0.0032(11)      | -0.0017(11)     |
| C(15) | 0.0330(13)      | 0.0664(17)      | 0.057(2)        | -0.0178(13)     | -0.0119(14)     | -0.0129(14)     |
| C(16) | 0.0535(17)      | 0.0692(19)      | 0.0502(19)      | -0.0284(15)     | -0.0142(15)     | 0.0108(15)      |
| C(17) | 0.077(2)        | 0.0705(19)      | 0.0342(18)      | -0.0362(17)     | -0.0091(16)     | 0.0031(15)      |
| C(18) | 0.064(2)        | 0.066(2)        | 0.060(2)        | -0.0409(18)     | -0.0056(18)     | 0.0112(17)      |
| C(19) | 0.0401(14)      | 0.0675(17)      | 0.0390(18)      | -0.0138(13)     | -0.0139(14)     | -0.0022(14)     |
| C(20) | 0.0624(18)      | 0.0711(19)      | 0.0408(18)      | -0.0330(16)     | -0.0194(15)     | 0.0152(14)      |
| C(21) | 0.063(2)        | 0.077(2)        | 0.047(2)        | -0.0276(18)     | -0.0076(16)     | 0.0042(16)      |
| C(22) | 0.114(3)        | 0.127(3)        | 0.053(2)        | -0.088(3)       | -0.036(2)       | 0.007(2)        |

The general temperature factor expression:  $\exp(-2\pi^2(a^2U_{11}h^2 + b^2U_{22}k^2 + c^2U_{33}l^2 + 2a*b*U_{12}hk + 2a*c*U_{13}hl + 2b*c*U_{23}kl))$

Table 3. Bond lengths (Å)

| atom  | atom  | distance   | atom  | atom  | distance   |
|-------|-------|------------|-------|-------|------------|
| S(1)  | O(2)  | 1.4382(13) | S(1)  | O(3)  | 1.4418(18) |
| S(1)  | N(7)  | 1.6626(17) | S(1)  | C(11) | 1.743(2)   |
| N(4)  | N(5)  | 1.385(3)   | N(4)  | C(10) | 1.273(3)   |
| N(5)  | C(12) | 1.366(3)   | N(5)  | H(4)  | 0.82(2)    |
| N(6)  | N(7)  | 1.404(2)   | N(6)  | C(14) | 1.298(3)   |
| N(7)  | C(22) | 1.474(6)   | C(8)  | C(11) | 1.400(3)   |
| C(8)  | C(13) | 1.389(3)   | C(8)  | C(14) | 1.467(3)   |
| C(9)  | C(10) | 1.509(4)   | C(9)  | C(16) | 1.520(3)   |
| C(9)  | H(13) | 1.13(2)    | C(9)  | H(14) | 0.94(2)    |
| C(10) | C(20) | 1.514(3)   | C(11) | C(12) | 1.399(3)   |
| C(12) | C(19) | 1.407(4)   | C(13) | C(15) | 1.371(4)   |
| C(13) | H(1)  | 0.941(19)  | C(14) | C(18) | 1.500(4)   |
| C(15) | C(19) | 1.356(4)   | C(15) | H(2)  | 0.89(2)    |
| C(16) | C(21) | 1.530(4)   | C(16) | H(11) | 0.99(2)    |
| C(16) | H(12) | 1.10(2)    | C(17) | C(20) | 1.522(3)   |
| C(17) | C(21) | 1.522(5)   | C(17) | H(7)  | 1.10(2)    |
| C(17) | H(8)  | 1.06(2)    | C(18) | H(18) | 0.98(2)    |
| C(18) | H(19) | 0.97(2)    | C(18) | H(20) | 0.99(2)    |
| C(19) | H(3)  | 0.93(2)    | C(20) | H(5)  | 1.12(2)    |
| C(20) | H(6)  | 0.98(2)    | C(21) | H(9)  | 1.01(2)    |
| C(21) | H(10) | 1.00(2)    | C(22) | H(15) | 0.92(2)    |
| C(22) | H(16) | 0.88(3)    | C(22) | H(17) | 1.01(2)    |

Table 4. Bond angles ( $^{\circ}$ )

| atom  | atom  | atom  | angle      | atom  | atom  | atom  | angle      |
|-------|-------|-------|------------|-------|-------|-------|------------|
| O(2)  | S(1)  | O(3)  | 117.60(9)  | O(2)  | S(1)  | N(7)  | 111.20(8)  |
| O(2)  | S(1)  | C(11) | 109.90(10) | O(3)  | S(1)  | N(7)  | 106.59(9)  |
| O(3)  | S(1)  | C(11) | 111.94(10) | N(7)  | S(1)  | C(11) | 97.75(10)  |
| N(5)  | N(4)  | C(10) | 118.2(2)   | N(4)  | N(5)  | C(12) | 119.3(2)   |
| N(4)  | N(5)  | H(4)  | 119.5(15)  | C(12) | N(5)  | H(4)  | 119.7(15)  |
| N(7)  | N(6)  | C(14) | 117.12(19) | S(1)  | N(7)  | N(6)  | 117.13(15) |
| S(1)  | N(7)  | C(22) | 114.8(2)   | N(6)  | N(7)  | C(22) | 111.1(2)   |
| C(11) | C(8)  | C(13) | 118.8(2)   | C(11) | C(8)  | C(14) | 120.3(2)   |
| C(13) | C(8)  | C(14) | 121.0(2)   | C(10) | C(9)  | C(16) | 111.4(2)   |
| C(10) | C(9)  | H(13) | 103.4(14)  | C(10) | C(9)  | H(14) | 114.3(15)  |
| C(16) | C(9)  | H(13) | 111.6(11)  | C(16) | C(9)  | H(14) | 108.8(11)  |
| H(13) | C(9)  | H(14) | 107.3(18)  | N(4)  | C(10) | C(9)  | 129.4(2)   |
| N(4)  | C(10) | C(20) | 116.8(2)   | C(9)  | C(10) | C(20) | 113.8(2)   |
| S(1)  | C(11) | C(8)  | 116.37(17) | S(1)  | C(11) | C(12) | 120.89(17) |
| C(8)  | C(11) | C(12) | 122.2(2)   | N(5)  | C(12) | C(11) | 121.5(2)   |
| N(5)  | C(12) | C(19) | 121.9(2)   | C(11) | C(12) | C(19) | 116.5(2)   |
| C(8)  | C(13) | C(15) | 119.1(2)   | C(8)  | C(13) | H(1)  | 117.4(13)  |
| C(15) | C(13) | H(1)  | 123.5(13)  | N(6)  | C(14) | C(8)  | 125.1(2)   |
| N(6)  | C(14) | C(18) | 114.3(2)   | C(8)  | C(14) | C(18) | 120.6(2)   |
| C(13) | C(15) | C(19) | 122.4(2)   | C(13) | C(15) | H(2)  | 116.3(12)  |
| C(19) | C(15) | H(2)  | 121.2(12)  | C(9)  | C(16) | C(21) | 112.1(2)   |
| C(9)  | C(16) | H(11) | 108.0(9)   | C(9)  | C(16) | H(12) | 110.1(10)  |
| C(21) | C(16) | H(11) | 109.7(11)  | C(21) | C(16) | H(12) | 106.9(12)  |
| H(11) | C(16) | H(12) | 110.1(17)  | C(20) | C(17) | C(21) | 110.6(2)   |
| C(20) | C(17) | H(7)  | 108.8(10)  | C(20) | C(17) | H(8)  | 111.2(10)  |
| C(21) | C(17) | H(7)  | 105.4(13)  | C(21) | C(17) | H(8)  | 110.7(14)  |
| H(7)  | C(17) | H(8)  | 110.0(17)  | C(14) | C(18) | H(18) | 115.9(19)  |
| C(14) | C(18) | H(19) | 110.3(15)  | C(14) | C(18) | H(20) | 114.2(13)  |
| H(18) | C(18) | H(19) | 116(2)     | H(18) | C(18) | H(20) | 97(2)      |
| H(19) | C(18) | H(20) | 102(2)     | C(12) | C(19) | C(15) | 120.9(2)   |
| C(12) | C(19) | H(3)  | 113.3(15)  | C(15) | C(19) | H(3)  | 125.6(14)  |
| C(10) | C(20) | C(17) | 109.8(2)   | C(10) | C(20) | H(5)  | 105.7(12)  |
| C(10) | C(20) | H(6)  | 107.8(12)  | C(17) | C(20) | H(5)  | 115.3(10)  |
| C(17) | C(20) | H(6)  | 112.4(10)  | H(5)  | C(20) | H(6)  | 105.3(17)  |
| C(16) | C(21) | C(17) | 111.5(2)   | C(16) | C(21) | H(9)  | 111.1(13)  |
| C(16) | C(21) | H(10) | 104.8(16)  | C(17) | C(21) | H(9)  | 105.3(14)  |
| C(17) | C(21) | H(10) | 112.7(19)  | H(9)  | C(21) | H(10) | 111.6(19)  |

Table 4. Bond angles ( $^{\circ}$ ) (continued)

| atom  | atom  | atom  | angle  | atom  | atom  | atom  | angle  |
|-------|-------|-------|--------|-------|-------|-------|--------|
| N(7)  | C(22) | H(15) | 108(2) | N(7)  | C(22) | H(16) | 107(2) |
| N(7)  | C(22) | H(17) | 114(2) | H(15) | C(22) | H(16) | 110(2) |
| H(15) | C(22) | H(17) | 103(2) | H(16) | C(22) | H(17) | 115(2) |

Table 5. Torsion Angles( $^{\circ}$ )

| atom1 | atom2 | atom3 | atom4 | angle       | atom1 | atom2 | atom3 | atom4 | angle       |
|-------|-------|-------|-------|-------------|-------|-------|-------|-------|-------------|
| O(2)  | S(1)  | N(7)  | N(6)  | -57.56(18)  | O(2)  | S(1)  | N(7)  | C(22) | 75.4(2)     |
| O(2)  | S(1)  | C(11) | C(8)  | 77.82(15)   | O(2)  | S(1)  | C(11) | C(12) | -94.18(16)  |
| O(3)  | S(1)  | N(7)  | N(6)  | 173.08(14)  | O(3)  | S(1)  | N(7)  | C(22) | -54.0(2)    |
| O(3)  | S(1)  | C(11) | C(8)  | -149.56(13) | O(3)  | S(1)  | C(11) | C(12) | 38.44(17)   |
| N(7)  | S(1)  | C(11) | C(8)  | -38.12(15)  | N(7)  | S(1)  | C(11) | C(12) | 149.88(15)  |
| C(11) | S(1)  | N(7)  | N(6)  | 57.35(16)   | C(11) | S(1)  | N(7)  | C(22) | -169.7(2)   |
| N(5)  | N(4)  | C(10) | C(9)  | 0.5(3)      | N(5)  | N(4)  | C(10) | C(20) | 177.98(17)  |
| C(10) | N(4)  | N(5)  | C(12) | -178.15(17) | N(4)  | N(5)  | C(12) | C(11) | 170.42(16)  |
| N(4)  | N(5)  | C(12) | C(19) | -7.3(2)     | N(7)  | N(6)  | C(14) | C(8)  | 0.7(2)      |
| N(7)  | N(6)  | C(14) | C(18) | -177.89(16) | C(14) | N(6)  | N(7)  | S(1)  | -43.1(2)    |
| C(14) | N(6)  | N(7)  | C(22) | -177.7(2)   | C(11) | C(8)  | C(13) | C(15) | -1.5(2)     |
| C(13) | C(8)  | C(11) | S(1)  | -172.22(14) | C(13) | C(8)  | C(11) | C(12) | -0.3(2)     |
| C(11) | C(8)  | C(14) | N(6)  | 17.1(2)     | C(11) | C(8)  | C(14) | C(18) | -164.42(18) |
| C(14) | C(8)  | C(11) | S(1)  | 7.8(2)      | C(14) | C(8)  | C(11) | C(12) | 179.65(16)  |
| C(13) | C(8)  | C(14) | N(6)  | -162.90(18) | C(13) | C(8)  | C(14) | C(18) | 15.6(2)     |
| C(14) | C(8)  | C(13) | C(15) | 178.47(18)  | C(10) | C(9)  | C(16) | C(21) | 50.8(3)     |
| C(16) | C(9)  | C(10) | N(4)  | 124.8(2)    | C(16) | C(9)  | C(10) | C(20) | -52.8(2)    |
| N(4)  | C(10) | C(20) | C(17) | -122.0(2)   | C(9)  | C(10) | C(20) | C(17) | 55.9(3)     |
| S(1)  | C(11) | C(12) | N(5)  | -4.0(2)     | S(1)  | C(11) | C(12) | C(19) | 173.82(15)  |
| C(8)  | C(11) | C(12) | N(5)  | -175.55(17) | C(8)  | C(11) | C(12) | C(19) | 2.3(2)      |
| N(5)  | C(12) | C(19) | C(15) | 175.4(2)    | C(11) | C(12) | C(19) | C(15) | -2.5(3)     |
| C(8)  | C(13) | C(15) | C(19) | 1.4(3)      | C(13) | C(15) | C(19) | C(12) | 0.7(3)      |
| C(9)  | C(16) | C(21) | C(17) | -53.7(3)    | C(20) | C(17) | C(21) | C(16) | 56.9(3)     |
| C(21) | C(17) | C(20) | C(10) | -57.0(3)    |       |       |       |       |             |

The sign is positive if when looking from atom 2 to atom 3 a clock-wise motion of atom 1 would superimpose it on atom 4.



Table 6. Distances beyond the asymmetric unit out to 3.60 Å

| atom  | atom                 | distance  | atom  | atom                 | distance  |
|-------|----------------------|-----------|-------|----------------------|-----------|
| S(1)  | H(1) <sup>11</sup>   | 3.490(19) | S(1)  | H(2) <sup>11</sup>   | 3.478(18) |
| S(1)  | H(12) <sup>21</sup>  | 3.47(2)   | O(2)  | C(13) <sup>11</sup>  | 3.444(3)  |
| O(2)  | C(16) <sup>21</sup>  | 3.524(3)  | O(2)  | H(1) <sup>11</sup>   | 2.77(2)   |
| O(2)  | H(2) <sup>11</sup>   | 3.05(2)   | O(2)  | H(2) <sup>31</sup>   | 3.03(2)   |
| O(2)  | H(7) <sup>21</sup>   | 3.56(2)   | O(2)  | H(12) <sup>21</sup>  | 2.50(2)   |
| O(3)  | C(15) <sup>11</sup>  | 3.425(2)  | O(3)  | H(1) <sup>11</sup>   | 3.431(17) |
| O(3)  | H(2) <sup>11</sup>   | 2.965(16) | O(3)  | H(3) <sup>41</sup>   | 3.208(18) |
| O(3)  | H(11) <sup>51</sup>  | 2.95(2)   | O(3)  | H(13) <sup>51</sup>  | 3.13(3)   |
| O(3)  | H(14) <sup>51</sup>  | 3.55(2)   | N(4)  | H(1) <sup>31</sup>   | 3.365(17) |
| N(4)  | H(20) <sup>31</sup>  | 2.88(2)   | N(5)  | N(5) <sup>41</sup>   | 3.452(2)  |
| N(5)  | C(12) <sup>41</sup>  | 3.585(2)  | N(5)  | H(1) <sup>31</sup>   | 3.521(18) |
| N(5)  | H(4) <sup>41</sup>   | 3.357(18) | N(6)  | H(5) <sup>41</sup>   | 2.95(2)   |
| N(6)  | H(10) <sup>61</sup>  | 2.90(2)   | N(6)  | H(10) <sup>21</sup>  | 3.49(2)   |
| N(6)  | H(12) <sup>21</sup>  | 3.060(19) | N(6)  | H(18) <sup>71</sup>  | 3.09(2)   |
| N(7)  | C(20) <sup>41</sup>  | 3.530(2)  | N(7)  | H(5) <sup>41</sup>   | 2.765(19) |
| N(7)  | H(6) <sup>41</sup>   | 3.351(17) | C(8)  | C(19) <sup>31</sup>  | 3.587(3)  |
| C(8)  | H(5) <sup>41</sup>   | 3.31(2)   | C(8)  | H(13) <sup>41</sup>  | 2.96(2)   |
| C(10) | H(20) <sup>31</sup>  | 3.41(2)   | C(11) | C(15) <sup>31</sup>  | 3.591(3)  |
| C(11) | H(2) <sup>31</sup>   | 3.365(16) | C(11) | H(5) <sup>41</sup>   | 3.54(2)   |
| C(11) | H(13) <sup>41</sup>  | 3.31(2)   | C(12) | N(5) <sup>41</sup>   | 3.585(2)  |
| C(12) | C(13) <sup>31</sup>  | 3.549(3)  | C(12) | C(15) <sup>31</sup>  | 3.553(3)  |
| C(12) | H(1) <sup>31</sup>   | 3.518(16) | C(12) | H(2) <sup>31</sup>   | 3.487(16) |
| C(12) | H(4) <sup>41</sup>   | 3.330(19) | C(12) | H(13) <sup>41</sup>  | 3.518(19) |
| C(13) | O(2) <sup>81</sup>   | 3.444(3)  | C(13) | C(12) <sup>31</sup>  | 3.549(3)  |
| C(13) | C(19) <sup>31</sup>  | 3.367(2)  | C(13) | H(3) <sup>31</sup>   | 3.548(16) |
| C(13) | H(13) <sup>41</sup>  | 2.76(2)   | C(14) | H(5) <sup>41</sup>   | 3.15(2)   |
| C(14) | H(8) <sup>61</sup>   | 3.591(18) | C(14) | H(10) <sup>61</sup>  | 3.54(2)   |
| C(14) | H(12) <sup>21</sup>  | 3.050(18) | C(15) | O(3) <sup>81</sup>   | 3.425(2)  |
| C(15) | C(11) <sup>31</sup>  | 3.591(3)  | C(15) | C(12) <sup>31</sup>  | 3.553(3)  |
| C(15) | H(13) <sup>41</sup>  | 2.92(2)   | C(15) | H(14) <sup>81</sup>  | 3.51(2)   |
| C(16) | O(2) <sup>21</sup>   | 3.524(3)  | C(16) | H(3) <sup>11</sup>   | 3.10(2)   |
| C(16) | H(16) <sup>51</sup>  | 3.31(3)   | C(16) | H(20) <sup>21</sup>  | 3.45(2)   |
| C(17) | H(9) <sup>91</sup>   | 3.21(2)   | C(17) | H(15) <sup>101</sup> | 3.60(3)   |
| C(17) | H(17) <sup>101</sup> | 3.33(3)   | C(17) | H(19) <sup>111</sup> | 3.30(2)   |
| C(18) | H(6) <sup>31</sup>   | 3.25(2)   | C(18) | H(7) <sup>61</sup>   | 3.488(18) |
| C(18) | H(7) <sup>31</sup>   | 3.45(2)   | C(18) | H(8) <sup>61</sup>   | 3.262(18) |
| C(18) | H(10) <sup>61</sup>  | 3.54(2)   | C(18) | H(10) <sup>21</sup>  | 3.31(2)   |

Table 6. Distances beyond the asymmetric unit out to 3.60 Å (continued)

| atom  | atom                | distance  | atom  | atom                 | distance  |
|-------|---------------------|-----------|-------|----------------------|-----------|
| C(18) | H(11) <sup>2j</sup> | 3.571(16) | C(18) | H(12) <sup>2j</sup>  | 3.409(19) |
| C(18) | H(15) <sup>7j</sup> | 3.59(2)   | C(18) | H(17) <sup>7j</sup>  | 3.57(3)   |
| C(19) | C(8) <sup>3j</sup>  | 3.587(3)  | C(19) | C(13) <sup>3j</sup>  | 3.367(2)  |
| C(19) | H(1) <sup>3j</sup>  | 3.527(14) | C(19) | H(4) <sup>4j</sup>   | 3.47(2)   |
| C(19) | H(11) <sup>8j</sup> | 3.28(2)   | C(19) | H(13) <sup>4j</sup>  | 3.29(2)   |
| C(19) | H(14) <sup>4j</sup> | 3.512(17) | C(20) | N(7) <sup>4j</sup>   | 3.530(2)  |
| C(20) | H(9) <sup>9j</sup>  | 3.37(2)   | C(20) | H(15) <sup>10j</sup> | 3.40(3)   |
| C(20) | H(20) <sup>3j</sup> | 3.19(2)   | C(21) | H(5) <sup>9j</sup>   | 3.42(2)   |
| C(21) | H(8) <sup>9j</sup>  | 3.44(2)   | C(21) | H(16) <sup>5j</sup>  | 3.17(3)   |
| C(21) | H(18) <sup>2j</sup> | 3.53(2)   | C(22) | H(5) <sup>4j</sup>   | 3.54(2)   |
| C(22) | H(6) <sup>12j</sup> | 3.39(2)   | C(22) | H(8) <sup>12j</sup>  | 3.03(2)   |
| C(22) | H(9) <sup>5j</sup>  | 3.15(2)   | C(22) | H(18) <sup>7j</sup>  | 3.25(2)   |
| C(22) | H(19) <sup>1j</sup> | 3.60(2)   | H(1)  | S(1) <sup>8j</sup>   | 3.490(19) |
| H(1)  | O(2) <sup>8j</sup>  | 2.77(2)   | H(1)  | O(3) <sup>8j</sup>   | 3.431(17) |
| H(1)  | N(4) <sup>3j</sup>  | 3.365(17) | H(1)  | N(5) <sup>3j</sup>   | 3.521(18) |
| H(1)  | C(12) <sup>3j</sup> | 3.518(16) | H(1)  | C(19) <sup>3j</sup>  | 3.527(14) |
| H(1)  | H(3) <sup>3j</sup>  | 3.56(2)   | H(1)  | H(13) <sup>4j</sup>  | 3.13(3)   |
| H(1)  | H(17) <sup>8j</sup> | 3.30(3)   | H(2)  | S(1) <sup>8j</sup>   | 3.478(18) |
| H(2)  | O(2) <sup>8j</sup>  | 3.05(2)   | H(2)  | O(2) <sup>3j</sup>   | 3.03(2)   |
| H(2)  | O(3) <sup>8j</sup>  | 2.965(16) | H(2)  | C(11) <sup>3j</sup>  | 3.365(16) |
| H(2)  | C(12) <sup>3j</sup> | 3.487(16) | H(2)  | H(4) <sup>8j</sup>   | 3.49(3)   |
| H(2)  | H(12) <sup>8j</sup> | 3.26(3)   | H(2)  | H(13) <sup>4j</sup>  | 3.32(3)   |
| H(2)  | H(14) <sup>8j</sup> | 2.96(2)   | H(3)  | O(3) <sup>4j</sup>   | 3.208(18) |
| H(3)  | C(13) <sup>3j</sup> | 3.548(16) | H(3)  | C(16) <sup>8j</sup>  | 3.10(2)   |
| H(3)  | H(1) <sup>3j</sup>  | 3.56(2)   | H(3)  | H(4) <sup>4j</sup>   | 3.35(3)   |
| H(3)  | H(11) <sup>8j</sup> | 2.42(3)   | H(3)  | H(12) <sup>8j</sup>  | 3.07(3)   |
| H(3)  | H(14) <sup>8j</sup> | 3.21(3)   | H(3)  | H(20) <sup>3j</sup>  | 2.99(2)   |
| H(4)  | N(5) <sup>4j</sup>  | 3.357(18) | H(4)  | C(12) <sup>4j</sup>  | 3.330(19) |
| H(4)  | C(19) <sup>4j</sup> | 3.47(2)   | H(4)  | H(2) <sup>1j</sup>   | 3.49(3)   |
| H(4)  | H(3) <sup>4j</sup>  | 3.35(3)   | H(4)  | H(4) <sup>4j</sup>   | 3.46(2)   |
| H(5)  | N(6) <sup>4j</sup>  | 2.95(2)   | H(5)  | N(7) <sup>4j</sup>   | 2.765(19) |
| H(5)  | C(8) <sup>4j</sup>  | 3.31(2)   | H(5)  | C(11) <sup>4j</sup>  | 3.54(2)   |
| H(5)  | C(14) <sup>4j</sup> | 3.15(2)   | H(5)  | C(21) <sup>9j</sup>  | 3.42(2)   |
| H(5)  | C(22) <sup>4j</sup> | 3.54(2)   | H(5)  | H(8) <sup>9j</sup>   | 3.10(3)   |
| H(5)  | H(9) <sup>9j</sup>  | 2.90(3)   | H(5)  | H(10) <sup>9j</sup>  | 3.28(3)   |
| H(5)  | H(15) <sup>4j</sup> | 3.33(3)   | H(6)  | N(7) <sup>4j</sup>   | 3.351(17) |
| H(6)  | C(18) <sup>3j</sup> | 3.25(2)   | H(6)  | C(22) <sup>10j</sup> | 3.39(2)   |

Table 6. Distances beyond the asymmetric unit out to 3.60 Å (continued)

| atom  | atom                 | distance  | atom  | atom                 | distance  |
|-------|----------------------|-----------|-------|----------------------|-----------|
| H(6)  | H(9) <sup>9j</sup>   | 3.56(3)   | H(6)  | H(11) <sup>8j</sup>  | 3.54(3)   |
| H(6)  | H(15) <sup>10j</sup> | 2.72(4)   | H(6)  | H(15) <sup>4j</sup>  | 3.42(3)   |
| H(6)  | H(16) <sup>4j</sup>  | 3.43(3)   | H(6)  | H(17) <sup>10j</sup> | 3.32(3)   |
| H(6)  | H(18) <sup>3j</sup>  | 3.15(3)   | H(6)  | H(19) <sup>3j</sup>  | 3.38(3)   |
| H(6)  | H(20) <sup>3j</sup>  | 2.48(3)   | H(7)  | O(2) <sup>2j</sup>   | 3.56(2)   |
| H(7)  | C(18) <sup>11j</sup> | 3.488(18) | H(7)  | C(18) <sup>3j</sup>  | 3.45(2)   |
| H(7)  | H(17) <sup>10j</sup> | 3.38(4)   | H(7)  | H(17) <sup>2j</sup>  | 2.88(3)   |
| H(7)  | H(18) <sup>11j</sup> | 3.20(2)   | H(7)  | H(19) <sup>11j</sup> | 3.08(3)   |
| H(7)  | H(19) <sup>3j</sup>  | 2.87(4)   | H(7)  | H(20) <sup>3j</sup>  | 3.15(3)   |
| H(8)  | C(14) <sup>11j</sup> | 3.591(18) | H(8)  | C(18) <sup>11j</sup> | 3.262(18) |
| H(8)  | C(21) <sup>9j</sup>  | 3.44(2)   | H(8)  | C(22) <sup>10j</sup> | 3.03(2)   |
| H(8)  | H(5) <sup>9j</sup>   | 3.10(3)   | H(8)  | H(8) <sup>9j</sup>   | 3.58(3)   |
| H(8)  | H(9) <sup>9j</sup>   | 2.47(3)   | H(8)  | H(15) <sup>10j</sup> | 3.04(4)   |
| H(8)  | H(16) <sup>10j</sup> | 2.92(4)   | H(8)  | H(17) <sup>10j</sup> | 2.60(4)   |
| H(8)  | H(18) <sup>11j</sup> | 3.45(2)   | H(8)  | H(19) <sup>11j</sup> | 2.67(2)   |
| H(9)  | C(17) <sup>9j</sup>  | 3.21(2)   | H(9)  | C(20) <sup>9j</sup>  | 3.37(2)   |
| H(9)  | C(22) <sup>5j</sup>  | 3.15(2)   | H(9)  | H(5) <sup>9j</sup>   | 2.90(3)   |
| H(9)  | H(6) <sup>9j</sup>   | 3.56(3)   | H(9)  | H(8) <sup>9j</sup>   | 2.47(3)   |
| H(9)  | H(9) <sup>9j</sup>   | 3.26(3)   | H(9)  | H(15) <sup>5j</sup>  | 3.25(4)   |
| H(9)  | H(16) <sup>5j</sup>  | 2.45(4)   | H(9)  | H(17) <sup>5j</sup>  | 3.46(4)   |
| H(10) | N(6) <sup>11j</sup>  | 2.90(2)   | H(10) | N(6) <sup>2j</sup>   | 3.49(2)   |
| H(10) | C(14) <sup>11j</sup> | 3.54(2)   | H(10) | C(18) <sup>11j</sup> | 3.54(2)   |
| H(10) | C(18) <sup>2j</sup>  | 3.31(2)   | H(10) | H(5) <sup>9j</sup>   | 3.28(3)   |
| H(10) | H(15) <sup>11j</sup> | 3.07(4)   | H(10) | H(16) <sup>5j</sup>  | 3.45(4)   |
| H(10) | H(18) <sup>11j</sup> | 3.22(3)   | H(10) | H(18) <sup>2j</sup>  | 2.63(3)   |
| H(10) | H(20) <sup>2j</sup>  | 3.23(3)   | H(11) | O(3) <sup>5j</sup>   | 2.95(2)   |
| H(11) | C(18) <sup>2j</sup>  | 3.571(16) | H(11) | C(19) <sup>1j</sup>  | 3.28(2)   |
| H(11) | H(3) <sup>1j</sup>   | 2.42(3)   | H(11) | H(6) <sup>1j</sup>   | 3.54(3)   |
| H(11) | H(16) <sup>5j</sup>  | 2.78(3)   | H(11) | H(18) <sup>2j</sup>  | 3.46(2)   |
| H(11) | H(20) <sup>2j</sup>  | 2.94(2)   | H(12) | S(1) <sup>2j</sup>   | 3.47(2)   |
| H(12) | O(2) <sup>2j</sup>   | 2.50(2)   | H(12) | N(6) <sup>2j</sup>   | 3.060(19) |
| H(12) | C(14) <sup>2j</sup>  | 3.050(18) | H(12) | C(18) <sup>2j</sup>  | 3.409(19) |
| H(12) | H(2) <sup>1j</sup>   | 3.26(3)   | H(12) | H(3) <sup>1j</sup>   | 3.07(3)   |
| H(12) | H(18) <sup>2j</sup>  | 3.37(3)   | H(12) | H(20) <sup>2j</sup>  | 3.21(3)   |
| H(13) | O(3) <sup>5j</sup>   | 3.13(3)   | H(13) | C(8) <sup>4j</sup>   | 2.96(2)   |
| H(13) | C(11) <sup>4j</sup>  | 3.31(2)   | H(13) | C(12) <sup>4j</sup>  | 3.518(19) |
| H(13) | C(13) <sup>4j</sup>  | 2.76(2)   | H(13) | C(15) <sup>4j</sup>  | 2.92(2)   |

Table 6. Distances beyond the asymmetric unit out to 3.60 Å (continued)

| atom  | atom                 | distance  | atom  | atom                 | distance |
|-------|----------------------|-----------|-------|----------------------|----------|
| H(13) | C(19) <sup>4)</sup>  | 3.29(2)   | H(13) | H(1) <sup>4)</sup>   | 3.13(3)  |
| H(13) | H(2) <sup>4)</sup>   | 3.32(3)   | H(13) | H(16) <sup>5)</sup>  | 3.17(3)  |
| H(14) | O(3) <sup>5)</sup>   | 3.55(2)   | H(14) | C(15) <sup>1)</sup>  | 3.51(2)  |
| H(14) | C(19) <sup>4)</sup>  | 3.512(17) | H(14) | H(2) <sup>1)</sup>   | 2.96(2)  |
| H(14) | H(3) <sup>1)</sup>   | 3.21(3)   | H(15) | C(17) <sup>12)</sup> | 3.60(3)  |
| H(15) | C(18) <sup>7)</sup>  | 3.59(2)   | H(15) | C(20) <sup>12)</sup> | 3.40(3)  |
| H(15) | H(5) <sup>4)</sup>   | 3.33(3)   | H(15) | H(6) <sup>12)</sup>  | 2.72(4)  |
| H(15) | H(6) <sup>4)</sup>   | 3.42(3)   | H(15) | H(8) <sup>12)</sup>  | 3.04(4)  |
| H(15) | H(9) <sup>5)</sup>   | 3.25(4)   | H(15) | H(10) <sup>6)</sup>  | 3.07(4)  |
| H(15) | H(15) <sup>13)</sup> | 3.23(3)   | H(15) | H(18) <sup>7)</sup>  | 2.79(4)  |
| H(15) | H(20) <sup>7)</sup>  | 3.44(3)   | H(16) | C(16) <sup>5)</sup>  | 3.31(3)  |
| H(16) | C(21) <sup>5)</sup>  | 3.17(3)   | H(16) | H(6) <sup>4)</sup>   | 3.43(3)  |
| H(16) | H(8) <sup>12)</sup>  | 2.92(4)   | H(16) | H(9) <sup>5)</sup>   | 2.45(4)  |
| H(16) | H(10) <sup>5)</sup>  | 3.45(4)   | H(16) | H(11) <sup>5)</sup>  | 2.78(3)  |
| H(16) | H(13) <sup>5)</sup>  | 3.17(3)   | H(17) | C(17) <sup>12)</sup> | 3.33(3)  |
| H(17) | C(18) <sup>7)</sup>  | 3.57(3)   | H(17) | H(1) <sup>1)</sup>   | 3.30(3)  |
| H(17) | H(6) <sup>12)</sup>  | 3.32(3)   | H(17) | H(7) <sup>12)</sup>  | 3.38(4)  |
| H(17) | H(7) <sup>2)</sup>   | 2.88(3)   | H(17) | H(8) <sup>12)</sup>  | 2.60(4)  |
| H(17) | H(9) <sup>5)</sup>   | 3.46(4)   | H(17) | H(18) <sup>7)</sup>  | 2.87(4)  |
| H(17) | H(19) <sup>1)</sup>  | 2.72(4)   | H(17) | H(19) <sup>7)</sup>  | 3.55(4)  |
| H(18) | N(6) <sup>7)</sup>   | 3.09(2)   | H(18) | C(21) <sup>2)</sup>  | 3.53(2)  |
| H(18) | C(22) <sup>7)</sup>  | 3.25(2)   | H(18) | H(6) <sup>3)</sup>   | 3.15(3)  |
| H(18) | H(7) <sup>6)</sup>   | 3.20(2)   | H(18) | H(8) <sup>6)</sup>   | 3.45(2)  |
| H(18) | H(10) <sup>6)</sup>  | 3.22(3)   | H(18) | H(10) <sup>2)</sup>  | 2.63(3)  |
| H(18) | H(11) <sup>2)</sup>  | 3.46(2)   | H(18) | H(12) <sup>2)</sup>  | 3.37(3)  |
| H(18) | H(15) <sup>7)</sup>  | 2.79(4)   | H(18) | H(17) <sup>7)</sup>  | 2.87(4)  |
| H(18) | H(18) <sup>7)</sup>  | 3.53(4)   | H(19) | C(17) <sup>6)</sup>  | 3.30(2)  |
| H(19) | C(22) <sup>8)</sup>  | 3.60(2)   | H(19) | H(6) <sup>3)</sup>   | 3.38(3)  |
| H(19) | H(7) <sup>6)</sup>   | 3.08(3)   | H(19) | H(7) <sup>3)</sup>   | 2.87(4)  |
| H(19) | H(8) <sup>6)</sup>   | 2.67(2)   | H(19) | H(17) <sup>8)</sup>  | 2.72(4)  |
| H(19) | H(17) <sup>7)</sup>  | 3.55(4)   | H(20) | N(4) <sup>3)</sup>   | 2.88(2)  |
| H(20) | C(10) <sup>3)</sup>  | 3.41(2)   | H(20) | C(16) <sup>2)</sup>  | 3.45(2)  |
| H(20) | C(20) <sup>3)</sup>  | 3.19(2)   | H(20) | H(3) <sup>3)</sup>   | 2.99(2)  |
| H(20) | H(6) <sup>3)</sup>   | 2.48(3)   | H(20) | H(7) <sup>3)</sup>   | 3.15(3)  |
| H(20) | H(10) <sup>2)</sup>  | 3.23(3)   | H(20) | H(11) <sup>2)</sup>  | 2.94(2)  |
| H(20) | H(12) <sup>2)</sup>  | 3.21(3)   | H(20) | H(15) <sup>7)</sup>  | 3.44(3)  |

Symmetry Operators:

- |                    |                  |
|--------------------|------------------|
| (1) X+1,Y,Z        | (2) -X+1,-Y,-Z+1 |
| (3) -X,-Y,-Z+1     | (4) -X,-Y+1,-Z+1 |
| (5) -X+1,-Y+1,-Z+1 | (6) X-1,Y,Z+1    |
| (7) -X,-Y,-Z+2     | (8) X-1,Y,Z      |
| (9) -X+1,-Y+1,-Z   | (10) X,Y,Z-1     |
| (11) X+1,Y,Z-1     | (12) X,Y,Z+1     |
| (13) -X,-Y+1,-Z+2  |                  |

Table 7. Intramolecular and Intermolecular Hydrogen bonds

| D    | H    | A    | D...A    | D-H     | H...A   | D-H...A |
|------|------|------|----------|---------|---------|---------|
| N(5) | H(4) | O(3) | 2.834(3) | 0.82(2) | 2.19(2) | 136(2)  |

Note) 1. The symmetry operations are applied to the acceptors.  
2. Estimated standard deviations (esd's) are shown in the parentheses.  
They are not calculated when all atoms have an esd=0.0.
