# Supplementary material for: Thiadiazino-indole, thiadiazino-carbazole and benzothiadiazino-carbazole dioxides: synthesis, physicochemical and early ADME characterization of representatives of new tri-, tetra- and pentacyclic ring systems and their intermediates
Source: publisher site journal article supplement (doi:10.3762/bjoc.21.169), 2025-10-21
Supplement: Additional file 2 [file 7h_xrd.pdf › Átnevezett XRD/7h_xrd.pdf]

**143768**

**PGY0792\_1**

Submitted by: Pusztai Gyongyver  
Operator: Dancso Andras

X-ray Structure Report

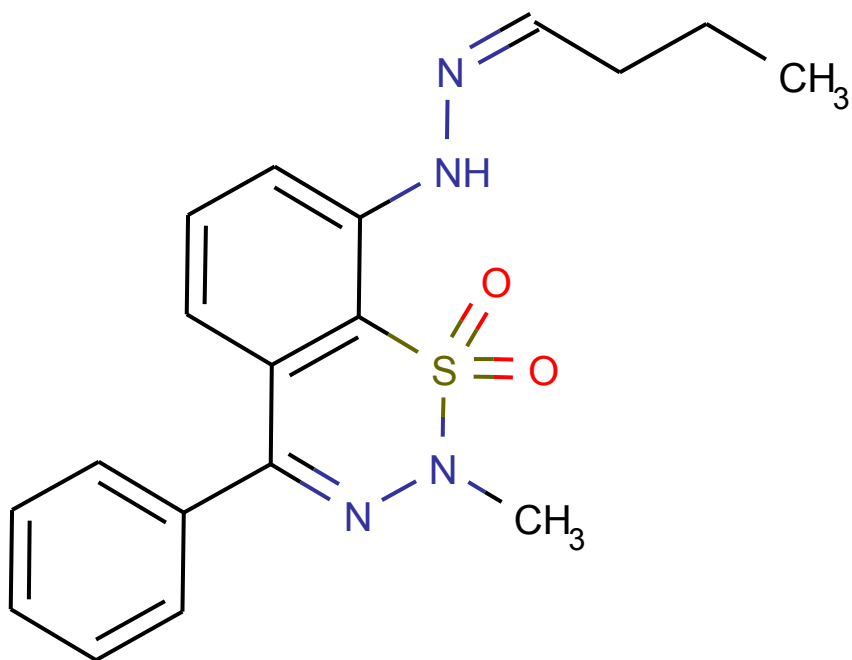

December 2, 2024

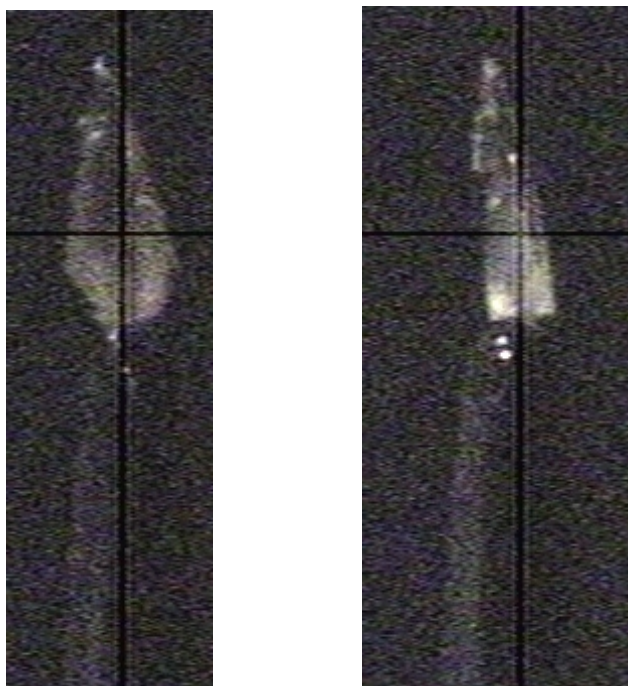

Fig. 1. The crystal

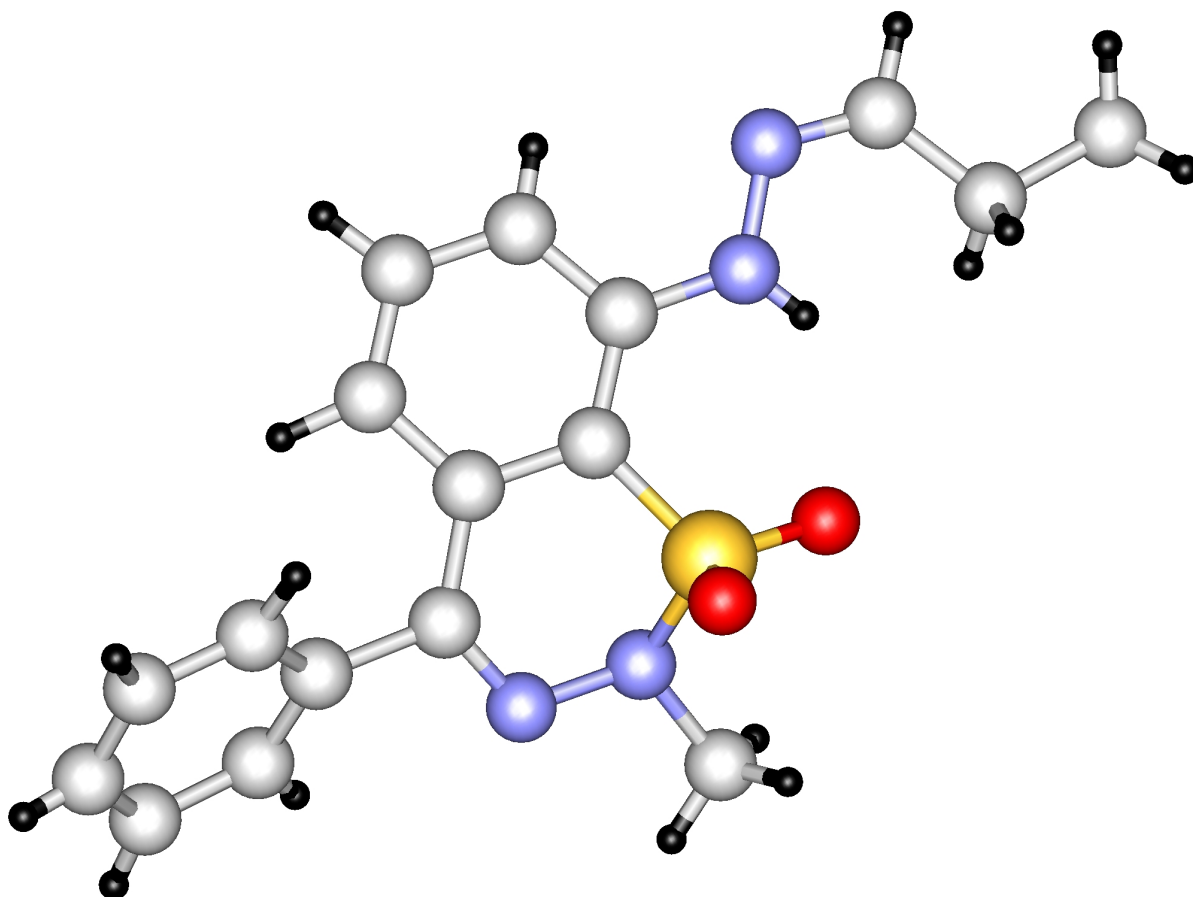

Fig. 2. the molecule (some hydrogens were generated by the software)

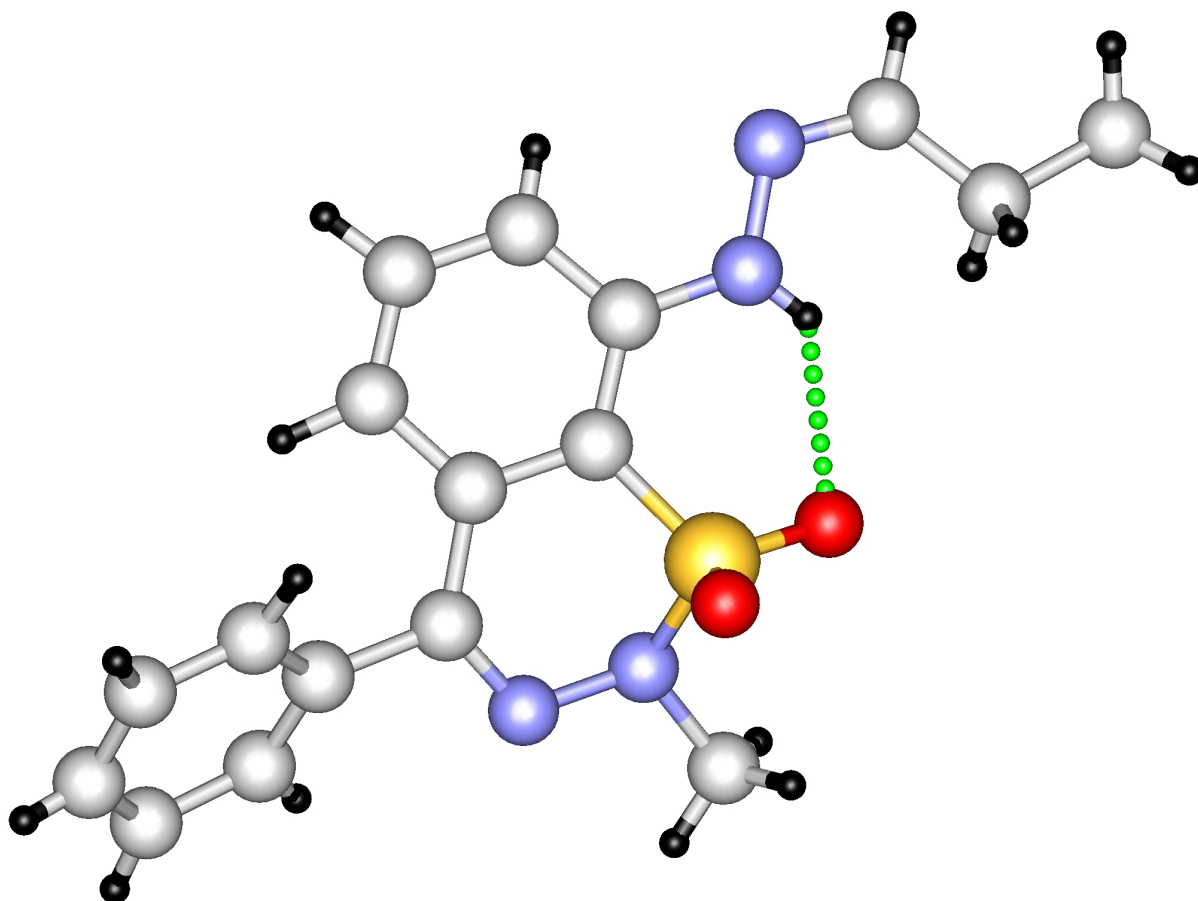

Fig. 3. Hydrogen bond

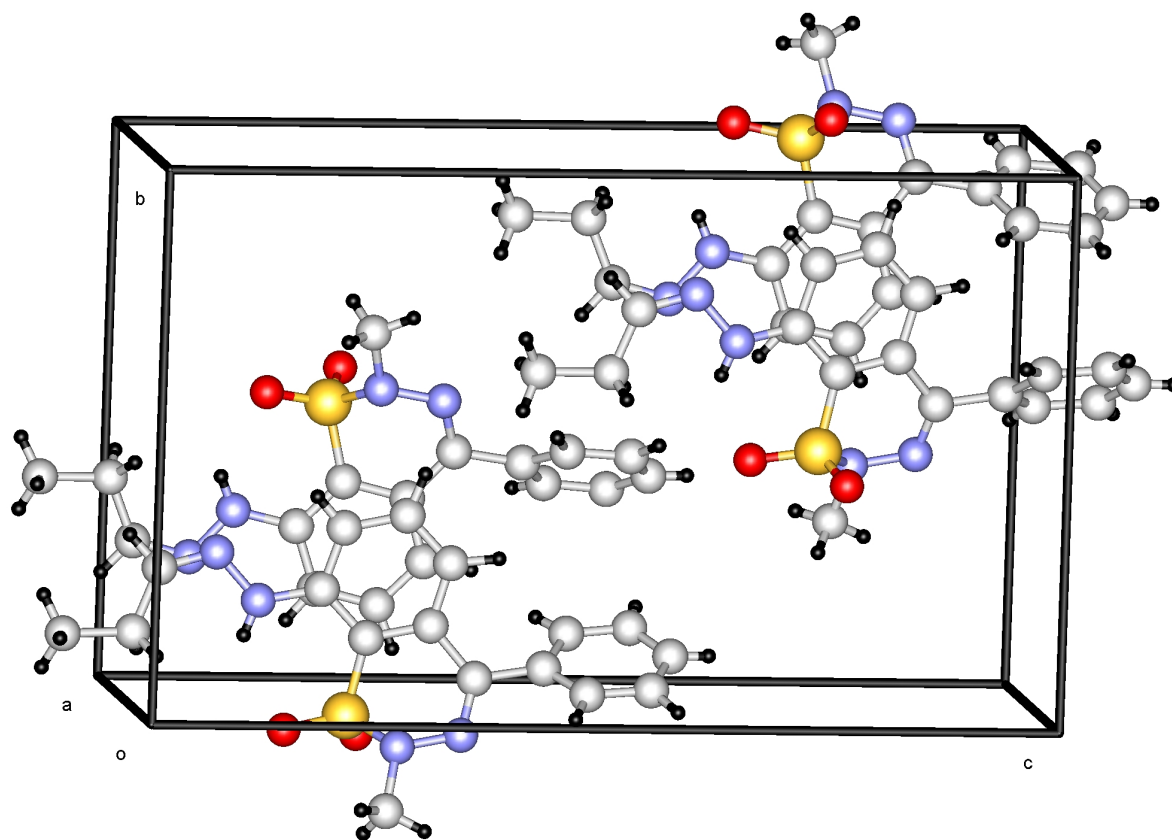

Fig. 4. Packing

## *Experimental*

### Data Collection

A colorless prism crystal of  $C_{17}H_{18}N_4O_2S$  having approximate dimensions of 0.39 x 0.14 x 0.09 mm was mounted on a cactus needle. All measurements were made on a Rigaku RAXIS RAPID imaging plate area detector with graphite monochromated Cu-K $\alpha$  radiation.

Indexing was performed from 4 oscillations that were exposed for 480 seconds. The crystal-to-detector distance was 127.40 mm.

Cell constants and an orientation matrix for data collection corresponded to a primitive orthorhombic cell with dimensions:

$$\begin{aligned}a &= 7.1655(3) \text{ \AA} \\b &= 11.9214(5) \text{ \AA} \\c &= 19.5707(9) \text{ \AA} \\V &= 1671.78(13) \text{ \AA}^3\end{aligned}$$

For  $Z = 4$  and F.W. = 342.41, the calculated density is 1.360 g/cm<sup>3</sup>. Based on the systematic absences of:

$$\begin{aligned}0kl: k+l \pm 2n \\h0l: h \pm 2n\end{aligned}$$

packing considerations, a statistical analysis of intensity distribution, and the successful solution and refinement of the structure, the space group was determined to be:

$$Pna2_1 \text{ (\#33)}$$

The data were collected at a temperature of  $20 \pm 1^\circ\text{C}$  to a maximum  $2\theta$  value of  $143.2^\circ$ . A total of 180 oscillation images were collected. A sweep of data was done using  $\omega$  scans from  $20.0$  to  $200.0^\circ$  in  $5.0^\circ$  step, at  $\chi=0.0^\circ$  and  $\phi = 0.0^\circ$ . The exposure rate was 96.0 [sec./ $^\circ$ ]. A second sweep was performed using  $\omega$  scans from  $20.0$  to  $200.0^\circ$  in  $5.0^\circ$  step, at  $\chi=54.0^\circ$  and  $\phi = 0.0^\circ$ . The exposure rate was 96.0 [sec./ $^\circ$ ]. Another sweep was performed using  $\omega$  scans from  $20.0$  to  $200.0^\circ$  in  $5.0^\circ$  step, at  $\chi=54.0^\circ$  and  $\phi = 90.0^\circ$ . The exposure rate was 96.0 [sec./ $^\circ$ ]. Another sweep was performed using  $\omega$  scans from  $20.0$  to  $200.0^\circ$  in  $5.0^\circ$  step, at  $\chi=54.0^\circ$  and  $\phi = 180.0^\circ$ . The exposure rate was 96.0 [sec./ $^\circ$ ]. Another sweep was performed using  $\omega$  scans from  $20.0$  to  $200.0^\circ$  in  $5.0^\circ$  step, at  $\chi=54.0^\circ$  and  $\phi = 270.0^\circ$ . The exposure rate was 96.0 [sec./ $^\circ$ ]. The crystal-to-detector distance was 127.40 mm. Readout was performed in the 0.100 mm pixel mode.

## Data Reduction

Of the 18065 reflections that were collected, 2751 were unique ( $R_{\text{int}} = 0.050$ ).

The linear absorption coefficient,  $\mu$ , for Cu-K $\alpha$  radiation is 18.688 cm<sup>-1</sup>. An empirical absorption correction was applied which resulted in transmission factors ranging from 0.604 to 0.853. The data were corrected for Lorentz and polarization effects.

## Structure Solution and Refinement

The structure was solved by direct methods<sup>1</sup> and expanded using Fourier techniques<sup>2</sup>. The non-hydrogen atoms were refined anisotropically. Some hydrogen atoms were refined isotropically and the rest were refined using the riding model. The final cycle of full-matrix least-squares refinement<sup>3</sup> on F was based on 13381 observed reflections ( $I > 2.00\sigma(I)$ ) and 262 variable parameters and converged (largest parameter shift was 0.00 times its esd) with unweighted and weighted agreement factors of:

$$R = \sum ||F_o| - |F_c|| / \sum |F_o| = 0.0556$$

$$R_w = [ \sum w (|F_o| - |F_c|)^2 / \sum w F_o^2 ]^{1/2} = 0.0550$$

The standard deviation of an observation of unit weight<sup>4</sup> was 2.93. Unit weights were used. Plots of  $\sum w (|F_o| - |F_c|)^2$  versus  $|F_o|$ , reflection order in data collection,  $\sin \theta/\lambda$  and various classes of indices showed no unusual trends. The maximum and minimum peaks on the final difference Fourier map corresponded to 7.02 and -4.97 e<sup>-</sup>/Å<sup>3</sup>, respectively.

Neutral atom scattering factors were taken from Cromer and Waber<sup>5</sup>. Anomalous dispersion effects were included in  $F_{\text{calc}}$ <sup>6</sup>; the values for  $\Delta f'$  and  $\Delta f''$  were those of Creagh and McAuley<sup>7</sup>. The values for the mass attenuation coefficients are those of Creagh and Hubbell<sup>8</sup>. All calculations were performed using the CrystalStructure<sup>9,10</sup> crystallographic software package.

## *References*

(1) SIR92: Altomare, A., Cascarano, G., Giacovazzo, C., Guagliardi, A., Burla, M., Polidori, G., and Camalli, M. (1994) J. Appl. Cryst., 27, 435.

(2) DIRDIF99: Beurskens, P.T., Admiraal, G., Beurskens, G., Bosman, W.P., de Gelder, R., Israel, R. and Smits, J.M.M. (1999). The DIRDIF-99 program system, Technical Report of the Crystallography Laboratory, University of Nijmegen, The Netherlands.

(3) Least Squares function minimized:

$$\sum w(|F_o| - |F_c|)^2 \quad \text{where } w = \text{Least Squares weights.}$$

(4) Standard deviation of an observation of unit weight:

$$[\sum w(|F_o| - |F_c|)^2 / (N_o - N_v)]^{1/2}$$

where:  $N_o$  = number of observations

$N_v$  = number of variables

(5) Cromer, D. T. & Waber, J. T.; "International Tables for X-ray Crystallography", Vol. IV, The Kynoch Press, Birmingham, England, Table 2.2 A (1974).

(6) Ibers, J. A. & Hamilton, W. C.; Acta Crystallogr., 17, 781 (1964).

(7) Creagh, D. C. & McAuley, W.J. ; "International Tables for Crystallography", Vol C, (A.J.C. Wilson, ed.), Kluwer Academic Publishers, Boston, Table 4.2.6.8, pages 219-222 (1992).

(8) Creagh, D. C. & Hubbell, J.H.; "International Tables for Crystallography", Vol C, (A.J.C. Wilson, ed.), Kluwer Academic Publishers, Boston, Table 4.2.4.3, pages 200-206 (1992).

(9) CrystalStructure 3.7.0: Crystal Structure Analysis Package, Rigaku and Rigaku/MSK (2000-2005). 9009 New Trails Dr. The Woodlands TX 77381 USA.

(10) CRYSTALS Issue 10: Watkin, D.J., Prout, C.K. Carruthers, J.R. & Betteridge, P.W. Chemical Crystallography Laboratory, Oxford, UK. (1996)



## EXPERIMENTAL DETAILS

### A. Crystal Data

|                         |                                                                                                                                |
|-------------------------|--------------------------------------------------------------------------------------------------------------------------------|
| Empirical Formula       | $C_{17}H_{18}N_4O_2S$                                                                                                          |
| Formula Weight          | 342.41                                                                                                                         |
| Crystal Color, Habit    | colorless, prism                                                                                                               |
| Crystal Dimensions      | 0.39 X 0.14 X 0.09 mm                                                                                                          |
| Crystal System          | orthorhombic                                                                                                                   |
| Lattice Type            | Primitive                                                                                                                      |
| Indexing Images         | 4 oscillations @ 480.0 seconds                                                                                                 |
| Detector Position       | 127.40 mm                                                                                                                      |
| Pixel Size              | 0.100 mm                                                                                                                       |
| Lattice Parameters      | $a = 7.1655(3) \text{ \AA}$<br>$b = 11.9214(5) \text{ \AA}$<br>$c = 19.5707(9) \text{ \AA}$<br>$V = 1671.78(13) \text{ \AA}^3$ |
| Space Group             | $Pna2_1$ (#33)                                                                                                                 |
| Z value                 | 4                                                                                                                              |
| $D_{\text{calc}}$       | $1.360 \text{ g/cm}^3$                                                                                                         |
| $F_{000}$               | 720.00                                                                                                                         |
| $\mu(\text{CuK}\alpha)$ | $18.688 \text{ cm}^{-1}$                                                                                                       |

## B. Intensity Measurements

|                                                           |                                                                       |
|-----------------------------------------------------------|-----------------------------------------------------------------------|
| Diffractometer                                            | Rigaku RAXIS-RAPID                                                    |
| Radiation                                                 | CuK $\alpha$ ( $\lambda$ = 1.54187 Å)<br>graphite monochromated       |
| Detector Aperture                                         | 280 mm x 256 mm                                                       |
| Data Images                                               | 180 exposures                                                         |
| $\omega$ oscillation Range ( $\chi$ =0.0, $\phi$ =0.0)    | 20.0 - 200.0°                                                         |
| Exposure Rate                                             | 96.0 sec./°                                                           |
| $\omega$ oscillation Range ( $\chi$ =54.0, $\phi$ =0.0)   | 20.0 - 200.0°                                                         |
| Exposure Rate                                             | 96.0 sec./°                                                           |
| $\omega$ oscillation Range ( $\chi$ =54.0, $\phi$ =90.0)  | 20.0 - 200.0°                                                         |
| Exposure Rate                                             | 96.0 sec./°                                                           |
| $\omega$ oscillation Range ( $\chi$ =54.0, $\phi$ =180.0) | 20.0 - 200.0°                                                         |
| Exposure Rate                                             | 96.0 sec./°                                                           |
| $\omega$ oscillation Range ( $\chi$ =54.0, $\phi$ =270.0) | 20.0 - 200.0°                                                         |
| Exposure Rate                                             | 96.0 sec./°                                                           |
| Detector Position                                         | 127.40 mm                                                             |
| Pixel Size                                                | 0.100 mm                                                              |
| $2\theta_{\text{max}}$                                    | 143.2°                                                                |
| No. of Reflections Measured                               | Total: 18065<br>Unique: 2751 ( $R_{\text{int}}$ = 0.050)              |
| Corrections                                               | Lorentz-polarization<br>Absorption<br>(trans. factors: 0.604 - 0.853) |

### C. Structure Solution and Refinement

|                                          |                                |
|------------------------------------------|--------------------------------|
| Structure Solution                       | Direct Methods (SIR92)         |
| Refinement                               | Full-matrix least-squares on F |
| Function Minimized                       | $\Sigma w ( Fo  -  Fc )^2$     |
| Least Squares Weights                    | 1                              |
| $2\theta_{\text{max}}$ cutoff            | 143.2 $^{\circ}$               |
| Anomalous Dispersion                     | All non-hydrogen atoms         |
| No. Observations ( $I > 2.00\sigma(I)$ ) | 13381                          |
| No. Variables                            | 262                            |
| Reflection/Parameter Ratio               | 51.07                          |
| Residuals: R ( $I > 2.00\sigma(I)$ )     | 0.0556                         |
| Residuals: Rw ( $I > 2.00\sigma(I)$ )    | 0.0550                         |
| Goodness of Fit Indicator                | 2.934                          |
| Max Shift/Error in Final Cycle           | 0.000                          |
| Maximum peak in Final Diff. Map          | 7.02 e $^{-}/\text{\AA}^3$     |
| Minimum peak in Final Diff. Map          | -4.97 e $^{-}/\text{\AA}^3$    |

Table 1. Atomic coordinates and B<sub>iso</sub>/B<sub>eq</sub>

| atom  | x           | y            | z            | B <sub>eq</sub> |
|-------|-------------|--------------|--------------|-----------------|
| S(1)  | 0.33904(11) | -0.01007(6)  | 0.23394(6)   | 4.036(18)       |
| O(2)  | 0.2844(2)   | -0.03193(14) | 0.16304(12)  | 5.15(6)         |
| O(3)  | 0.5094(2)   | -0.05803(16) | 0.25655(12)  | 4.77(5)         |
| N(1)  | 0.4054(4)   | 0.2765(2)    | 0.09041(17)  | 5.13(9)         |
| N(4)  | 0.1615(3)   | -0.05043(19) | 0.28126(14)  | 4.36(7)         |
| N(5)  | 0.1719(3)   | -0.0290(2)   | 0.35126(14)  | 4.04(7)         |
| N(6)  | 0.3967(4)   | 0.1911(2)    | 0.13725(18)  | 5.03(9)         |
| C(1)  | 0.3279(3)   | 0.1311(2)    | 0.25314(17)  | 3.54(8)         |
| C(8)  | 0.3609(4)   | 0.2155(2)    | 0.20479(18)  | 3.85(9)         |
| C(9)  | 0.2936(3)   | 0.1572(2)    | 0.32179(17)  | 3.24(8)         |
| C(10) | 0.2365(3)   | 0.0674(2)    | 0.36832(16)  | 3.37(8)         |
| C(12) | 0.2886(3)   | 0.2705(2)    | 0.3414(2)    | 3.79(8)         |
| C(13) | 0.2383(4)   | 0.0865(2)    | 0.44402(17)  | 3.93(8)         |
| C(14) | 0.3191(4)   | 0.3529(2)    | 0.2938(2)    | 4.09(9)         |
| C(15) | 0.0925(5)   | 0.0531(2)    | 0.4844(2)    | 4.97(11)        |
| C(16) | 0.4039(4)   | 0.2480(3)    | 0.0278(2)    | 5.95(11)        |
| C(17) | 0.0791(4)   | -0.1589(2)   | 0.26567(18)  | 6.57(11)        |
| C(18) | 0.1011(6)   | 0.0612(3)    | 0.5551(2)    | 5.89(13)        |
| C(19) | 0.3507(4)   | 0.3270(2)    | 0.2267(2)    | 4.53(9)         |
| C(20) | 0.4016(7)   | 0.1470(3)    | 0.5473(2)    | 5.68(13)        |
| C(21) | 0.3934(5)   | 0.1333(3)    | -0.00015(19) | 5.87(12)        |
| C(22) | 0.3927(5)   | 0.1366(3)    | 0.4774(2)    | 5.42(12)        |
| C(23) | 0.2538(7)   | 0.1095(3)    | 0.5843(2)    | 6.99(15)        |
| C(24) | 0.3668(5)   | 0.1308(3)    | -0.0788(2)   | 8.13(15)        |
| H(1)  | -0.014(4)   | 0.032(2)     | 0.5786(17)   | 7.3(9)          |
| H(2)  | -0.023(4)   | 0.018(2)     | 0.4657(12)   | 3.8(7)          |
| H(3)  | 0.269(2)    | 0.1095(16)   | 0.6274(11)   | 0.7(5)          |
| H(4)  | 0.526(3)    | 0.174(2)     | 0.5607(15)   | 4.5(8)          |
| H(5)  | 0.509(3)    | 0.1555(18)   | 0.4501(12)   | 2.6(6)          |
| H(6)  | 0.255(2)    | 0.2823(17)   | 0.3923(12)   | 2.2(5)          |
| H(7)  | 0.303(3)    | 0.429(2)     | 0.3111(13)   | 4.3(7)          |
| H(8)  | 0.344(3)    | 0.383(2)     | 0.1957(14)   | 4.7(8)          |
| H(9)  | 0.385(3)    | 0.1293(18)   | 0.1218(11)   | 0.6(5)          |
| H(10) | 0.4150      | 0.3057       | -0.0054      | 7.15            |
| H(12) | 0.5042      | 0.0937       | 0.0112       | 7.06            |
| H(13) | 0.2893      | 0.0975       | 0.0206       | 7.04            |
| H(14) | -0.0173     | -0.1492      | 0.2329       | 7.91            |

Table 1. Atomic coordinates and B<sub>iso</sub>/B<sub>eq</sub> (continued)

| atom  | x      | y       | z       | B <sub>eq</sub> |
|-------|--------|---------|---------|-----------------|
| H(15) | 0.0284 | -0.1906 | 0.3062  | 7.91            |
| H(16) | 0.1718 | -0.2077 | 0.2477  | 7.92            |
| H(17) | 0.2375 | 0.1332  | -0.0895 | 9.79            |
| H(18) | 0.4204 | 0.0648  | -0.0977 | 9.79            |
| H(19) | 0.4269 | 0.1949  | -0.0974 | 9.77            |

$$B_{eq} = 8/3 \pi^2 (U_{11}(aa^*)^2 + U_{22}(bb^*)^2 + U_{33}(cc^*)^2 + 2U_{12}(aa^*bb^*)\cos \gamma + 2U_{13}(aa^*cc^*)\cos \beta + 2U_{23}(bb^*cc^*)\cos \alpha)$$

Table 2. Anisotropic displacement parameters

| atom  | U <sub>11</sub> | U <sub>22</sub> | U <sub>33</sub> | U <sub>12</sub> | U <sub>13</sub> | U <sub>23</sub> |
|-------|-----------------|-----------------|-----------------|-----------------|-----------------|-----------------|
| S(1)  | 0.0553(4)       | 0.0446(4)       | 0.0534(5)       | -0.0005(3)      | 0.0031(5)       | -0.0016(5)      |
| O(2)  | 0.0850(16)      | 0.0590(14)      | 0.0516(16)      | -0.0106(11)     | -0.0017(13)     | -0.0055(12)     |
| O(3)  | 0.0606(13)      | 0.0551(11)      | 0.0657(18)      | 0.0143(11)      | -0.0060(12)     | -0.0087(11)     |
| N(1)  | 0.082(2)        | 0.0532(19)      | 0.060(2)        | -0.0065(15)     | 0.0132(19)      | 0.0098(18)      |
| N(4)  | 0.0689(18)      | 0.0434(15)      | 0.054(2)        | -0.0033(13)     | -0.0036(16)     | -0.0071(13)     |
| N(5)  | 0.0568(16)      | 0.0467(16)      | 0.050(2)        | -0.0071(13)     | -0.0004(14)     | 0.0011(13)      |
| N(6)  | 0.087(2)        | 0.046(2)        | 0.058(2)        | -0.0105(17)     | 0.0017(18)      | 0.0020(19)      |
| C(1)  | 0.0377(16)      | 0.0536(18)      | 0.043(2)        | 0.0028(14)      | -0.0041(16)     | 0.0021(15)      |
| C(8)  | 0.041(2)        | 0.058(2)        | 0.047(2)        | 0.0028(15)      | -0.0072(17)     | 0.0024(17)      |
| C(9)  | 0.0298(16)      | 0.0460(19)      | 0.047(2)        | -0.0047(12)     | -0.0058(15)     | -0.0012(17)     |
| C(10) | 0.0335(16)      | 0.054(2)        | 0.040(2)        | 0.0009(14)      | 0.0035(15)      | -0.0014(18)     |
| C(12) | 0.0418(18)      | 0.050(2)        | 0.052(2)        | -0.0019(14)     | 0.0063(17)      | -0.0057(19)     |
| C(13) | 0.054(2)        | 0.0395(18)      | 0.056(2)        | -0.0041(15)     | 0.0008(19)      | 0.0033(17)      |
| C(14) | 0.0497(19)      | 0.047(2)        | 0.059(2)        | 0.0020(16)      | 0.0031(19)      | -0.010(2)       |
| C(15) | 0.067(2)        | 0.055(2)        | 0.066(3)        | -0.0144(18)     | 0.009(2)        | 0.002(2)        |
| C(16) | 0.089(2)        | 0.081(2)        | 0.057(3)        | 0.002(2)        | 0.016(2)        | 0.029(2)        |
| C(17) | 0.110(2)        | 0.066(2)        | 0.073(3)        | -0.036(2)       | 0.012(2)        | -0.011(2)       |
| C(18) | 0.086(3)        | 0.067(2)        | 0.071(4)        | -0.005(2)       | 0.025(2)        | -0.002(2)       |
| C(19) | 0.0500(18)      | 0.0454(19)      | 0.077(3)        | -0.0020(15)     | -0.004(2)       | 0.026(2)        |
| C(20) | 0.097(3)        | 0.067(2)        | 0.051(3)        | -0.004(2)       | -0.008(2)       | -0.008(2)       |
| C(21) | 0.100(3)        | 0.075(3)        | 0.049(3)        | -0.002(2)       | 0.008(2)        | 0.009(2)        |
| C(22) | 0.064(2)        | 0.064(2)        | 0.077(3)        | -0.007(2)       | 0.015(2)        | 0.008(2)        |
| C(23) | 0.148(5)        | 0.074(2)        | 0.043(3)        | -0.001(3)       | 0.006(3)        | 0.001(2)        |
| C(24) | 0.117(4)        | 0.127(3)        | 0.065(3)        | 0.001(2)        | 0.006(2)        | -0.007(3)       |

The general temperature factor expression:  $\exp(-2\pi^2(a^2U_{11}h^2 + b^2U_{22}k^2 + c^2U_{33}l^2 + 2a*b*U_{12}hk + 2a*c*U_{13}hl + 2b*c*U_{23}kl))$

Table 3. Bond lengths (Å)

| atom  | atom  | distance | atom  | atom  | distance |
|-------|-------|----------|-------|-------|----------|
| S(1)  | O(2)  | 1.465(2) | S(1)  | O(3)  | 1.419(2) |
| S(1)  | N(4)  | 1.646(2) | S(1)  | C(1)  | 1.727(2) |
| N(1)  | N(6)  | 1.371(4) | N(1)  | C(16) | 1.271(5) |
| N(4)  | N(5)  | 1.396(4) | N(4)  | C(17) | 1.454(3) |
| N(5)  | C(10) | 1.284(3) | N(6)  | C(8)  | 1.377(4) |
| N(6)  | H(9)  | 0.80(2)  | C(1)  | C(8)  | 1.401(4) |
| C(1)  | C(9)  | 1.401(4) | C(8)  | C(19) | 1.399(4) |
| C(9)  | C(10) | 1.464(4) | C(9)  | C(12) | 1.404(4) |
| C(10) | C(13) | 1.499(4) | C(12) | C(14) | 1.371(5) |
| C(12) | H(6)  | 1.04(2)  | C(13) | C(15) | 1.369(5) |
| C(13) | C(22) | 1.417(5) | C(14) | C(19) | 1.367(6) |
| C(14) | H(7)  | 0.98(2)  | C(15) | C(18) | 1.389(6) |
| C(15) | H(2)  | 1.00(2)  | C(16) | C(21) | 1.475(5) |
| C(16) | H(10) | 0.950    | C(17) | H(14) | 0.950    |
| C(17) | H(15) | 0.950    | C(17) | H(16) | 0.950    |
| C(18) | C(23) | 1.363(6) | C(18) | H(1)  | 1.01(3)  |
| C(19) | H(8)  | 0.91(2)  | C(20) | C(22) | 1.374(6) |
| C(20) | C(23) | 1.359(7) | C(20) | H(4)  | 0.99(2)  |
| C(21) | C(24) | 1.551(5) | C(21) | H(12) | 0.950    |
| C(21) | H(13) | 0.950    | C(22) | H(5)  | 1.02(2)  |
| C(23) | H(3)  | 0.85(2)  | C(24) | H(17) | 0.950    |
| C(24) | H(18) | 0.950    | C(24) | H(19) | 0.950    |

Table 4. Bond angles ( $^{\circ}$ )

| atom  | atom  | atom  | angle      | atom  | atom  | atom  | angle      |
|-------|-------|-------|------------|-------|-------|-------|------------|
| O(2)  | S(1)  | O(3)  | 116.98(13) | O(2)  | S(1)  | N(4)  | 105.92(13) |
| O(2)  | S(1)  | C(1)  | 111.54(14) | O(3)  | S(1)  | N(4)  | 111.84(14) |
| O(3)  | S(1)  | C(1)  | 111.40(13) | N(4)  | S(1)  | C(1)  | 97.28(13)  |
| N(6)  | N(1)  | C(16) | 116.5(3)   | S(1)  | N(4)  | N(5)  | 117.23(19) |
| S(1)  | N(4)  | C(17) | 117.1(2)   | N(5)  | N(4)  | C(17) | 113.0(2)   |
| N(4)  | N(5)  | C(10) | 116.0(2)   | N(1)  | N(6)  | C(8)  | 119.6(2)   |
| N(1)  | N(6)  | H(9)  | 115.7(17)  | C(8)  | N(6)  | H(9)  | 122.5(17)  |
| S(1)  | C(1)  | C(8)  | 123.0(2)   | S(1)  | C(1)  | C(9)  | 115.7(2)   |
| C(8)  | C(1)  | C(9)  | 121.2(2)   | N(6)  | C(8)  | C(1)  | 121.9(2)   |
| N(6)  | C(8)  | C(19) | 120.3(3)   | C(1)  | C(8)  | C(19) | 117.8(3)   |
| C(1)  | C(9)  | C(10) | 118.9(2)   | C(1)  | C(9)  | C(12) | 118.7(2)   |
| C(10) | C(9)  | C(12) | 121.8(2)   | N(5)  | C(10) | C(9)  | 126.4(2)   |
| N(5)  | C(10) | C(13) | 113.3(2)   | C(9)  | C(10) | C(13) | 120.1(2)   |
| C(9)  | C(12) | C(14) | 120.0(3)   | C(9)  | C(12) | H(6)  | 113.5(11)  |
| C(14) | C(12) | H(6)  | 126.5(11)  | C(10) | C(13) | C(15) | 121.3(3)   |
| C(10) | C(13) | C(22) | 121.8(3)   | C(15) | C(13) | C(22) | 116.9(3)   |
| C(12) | C(14) | C(19) | 121.1(3)   | C(12) | C(14) | H(7)  | 114.5(15)  |
| C(19) | C(14) | H(7)  | 124.1(15)  | C(13) | C(15) | C(18) | 121.4(3)   |
| C(13) | C(15) | H(2)  | 122.9(15)  | C(18) | C(15) | H(2)  | 115.6(15)  |
| N(1)  | C(16) | C(21) | 127.3(3)   | N(1)  | C(16) | H(10) | 117.7      |
| C(21) | C(16) | H(10) | 115.0      | N(4)  | C(17) | H(14) | 109.2      |
| N(4)  | C(17) | H(15) | 109.5      | N(4)  | C(17) | H(16) | 109.8      |
| H(14) | C(17) | H(15) | 109.5      | H(14) | C(17) | H(16) | 109.5      |
| H(15) | C(17) | H(16) | 109.5      | C(15) | C(18) | C(23) | 118.9(4)   |
| C(15) | C(18) | H(1)  | 113.2(19)  | C(23) | C(18) | H(1)  | 128(2)     |
| C(8)  | C(19) | C(14) | 121.2(3)   | C(8)  | C(19) | H(8)  | 120.1(18)  |
| C(14) | C(19) | H(8)  | 117.8(17)  | C(22) | C(20) | C(23) | 117.7(4)   |
| C(22) | C(20) | H(4)  | 109.8(17)  | C(23) | C(20) | H(4)  | 132.1(17)  |
| C(16) | C(21) | C(24) | 113.1(3)   | C(16) | C(21) | H(12) | 109.3      |
| C(16) | C(21) | H(13) | 107.3      | C(24) | C(21) | H(12) | 109.0      |
| C(24) | C(21) | H(13) | 108.6      | H(12) | C(21) | H(13) | 109.5      |
| C(13) | C(22) | C(20) | 122.2(3)   | C(13) | C(22) | H(5)  | 119.5(14)  |
| C(20) | C(22) | H(5)  | 117.7(14)  | C(18) | C(23) | C(20) | 122.7(4)   |
| C(18) | C(23) | H(3)  | 121.1(14)  | C(20) | C(23) | H(3)  | 115.6(14)  |
| C(21) | C(24) | H(17) | 109.7      | C(21) | C(24) | H(18) | 110.7      |
| C(21) | C(24) | H(19) | 108.0      | H(17) | C(24) | H(18) | 109.5      |
| H(17) | C(24) | H(19) | 109.5      | H(18) | C(24) | H(19) | 109.5      |

Table 4. Bond angles ( $^{\circ}$ ) (continued)

| atom | atom | atom | angle | atom | atom | atom | angle |
|------|------|------|-------|------|------|------|-------|
|------|------|------|-------|------|------|------|-------|

Table 5. Torsion Angles( $^{\circ}$ )

| atom1 | atom2 | atom3 | atom4 | angle       | atom1 | atom2 | atom3 | atom4 | angle      |
|-------|-------|-------|-------|-------------|-------|-------|-------|-------|------------|
| O(2)  | S(1)  | N(4)  | N(5)  | -174.43(18) | O(2)  | S(1)  | N(4)  | C(17) | 46.4(2)    |
| O(2)  | S(1)  | C(1)  | C(8)  | -31.2(2)    | O(2)  | S(1)  | C(1)  | C(9)  | 152.26(19) |
| O(3)  | S(1)  | N(4)  | N(5)  | 57.1(2)     | O(3)  | S(1)  | N(4)  | C(17) | -82.1(2)   |
| O(3)  | S(1)  | C(1)  | C(8)  | 101.5(2)    | O(3)  | S(1)  | C(1)  | C(9)  | -75.0(2)   |
| N(4)  | S(1)  | C(1)  | C(8)  | -141.6(2)   | N(4)  | S(1)  | C(1)  | C(9)  | 41.9(2)    |
| C(1)  | S(1)  | N(4)  | N(5)  | -59.5(2)    | C(1)  | S(1)  | N(4)  | C(17) | 161.3(2)   |
| N(6)  | N(1)  | C(16) | C(21) | 0.2(4)      | C(16) | N(1)  | N(6)  | C(8)  | -167.3(3)  |
| S(1)  | N(4)  | N(5)  | C(10) | 41.9(3)     | C(17) | N(4)  | N(5)  | C(10) | -177.3(2)  |
| N(4)  | N(5)  | C(10) | C(9)  | 2.2(4)      | N(4)  | N(5)  | C(10) | C(13) | 178.2(2)   |
| N(1)  | N(6)  | C(8)  | C(1)  | 172.0(2)    | N(1)  | N(6)  | C(8)  | C(19) | -6.0(4)    |
| S(1)  | C(1)  | C(8)  | N(6)  | 3.0(4)      | S(1)  | C(1)  | C(8)  | C(19) | -179.0(2)  |
| S(1)  | C(1)  | C(9)  | C(10) | -11.2(3)    | S(1)  | C(1)  | C(9)  | C(12) | 178.02(19) |
| C(8)  | C(1)  | C(9)  | C(10) | 172.2(2)    | C(8)  | C(1)  | C(9)  | C(12) | 1.4(3)     |
| C(9)  | C(1)  | C(8)  | N(6)  | 179.3(2)    | C(9)  | C(1)  | C(8)  | C(19) | -2.7(4)    |
| N(6)  | C(8)  | C(19) | C(14) | -178.7(3)   | C(1)  | C(8)  | C(19) | C(14) | 3.3(4)     |
| C(1)  | C(9)  | C(10) | N(5)  | -17.3(4)    | C(1)  | C(9)  | C(10) | C(13) | 166.9(2)   |
| C(1)  | C(9)  | C(12) | C(14) | -0.7(3)     | C(10) | C(9)  | C(12) | C(14) | -171.3(2)  |
| C(12) | C(9)  | C(10) | N(5)  | 153.2(2)    | C(12) | C(9)  | C(10) | C(13) | -22.5(3)   |
| N(5)  | C(10) | C(13) | C(15) | -41.1(4)    | N(5)  | C(10) | C(13) | C(22) | 137.0(3)   |
| C(9)  | C(10) | C(13) | C(15) | 135.2(3)    | C(9)  | C(10) | C(13) | C(22) | -46.8(4)   |
| C(9)  | C(12) | C(14) | C(19) | 1.4(4)      | C(10) | C(13) | C(15) | C(18) | 173.9(3)   |
| C(10) | C(13) | C(22) | C(20) | -175.2(3)   | C(15) | C(13) | C(22) | C(20) | 3.0(5)     |
| C(22) | C(13) | C(15) | C(18) | -4.2(5)     | C(12) | C(14) | C(19) | C(8)  | -2.7(4)    |
| C(13) | C(15) | C(18) | C(23) | 3.9(5)      | N(1)  | C(16) | C(21) | C(24) | 171.9(3)   |
| C(15) | C(18) | C(23) | C(20) | -2.3(6)     | C(22) | C(20) | C(23) | C(18) | 1.1(6)     |
| C(23) | C(20) | C(22) | C(13) | -1.4(6)     |       |       |       |       |            |

The sign is positive if when looking from atom 2 to atom 3 a clock-wise motion of atom 1 would superimpose it on atom 4.



Table 6. Distances beyond the asymmetric unit out to 3.60 Å

| atom  | atom                 | distance | atom  | atom                 | distance |
|-------|----------------------|----------|-------|----------------------|----------|
| O(2)  | C(18) <sup>11</sup>  | 3.495(4) | O(2)  | C(20) <sup>21</sup>  | 3.476(5) |
| O(2)  | H(1) <sup>11</sup>   | 2.55(3)  | O(2)  | H(3) <sup>21</sup>   | 3.40(2)  |
| O(2)  | H(4) <sup>21</sup>   | 2.95(2)  | O(3)  | C(14) <sup>31</sup>  | 3.382(3) |
| O(3)  | C(17) <sup>41</sup>  | 3.416(3) | O(3)  | C(24) <sup>51</sup>  | 3.453(4) |
| O(3)  | H(3) <sup>21</sup>   | 3.05(2)  | O(3)  | H(7) <sup>31</sup>   | 2.81(2)  |
| O(3)  | H(8) <sup>31</sup>   | 3.39(2)  | O(3)  | H(14) <sup>61</sup>  | 3.591    |
| O(3)  | H(14) <sup>41</sup>  | 3.526    | O(3)  | H(15) <sup>41</sup>  | 3.153    |
| O(3)  | H(16) <sup>41</sup>  | 3.030    | O(3)  | H(18) <sup>51</sup>  | 2.898    |
| O(3)  | H(19) <sup>51</sup>  | 3.323    | N(1)  | C(18) <sup>71</sup>  | 3.464(5) |
| N(1)  | H(1) <sup>71</sup>   | 3.15(3)  | N(1)  | H(13) <sup>31</sup>  | 3.419    |
| N(4)  | C(14) <sup>81</sup>  | 3.410(4) | N(4)  | H(7) <sup>81</sup>   | 3.00(2)  |
| N(4)  | H(8) <sup>81</sup>   | 3.46(2)  | N(5)  | C(14) <sup>81</sup>  | 3.474(4) |
| N(5)  | H(7) <sup>81</sup>   | 3.00(2)  | N(5)  | H(10) <sup>91</sup>  | 3.484    |
| N(5)  | H(17) <sup>101</sup> | 3.390    | N(5)  | H(18) <sup>51</sup>  | 3.117    |
| N(5)  | H(19) <sup>91</sup>  | 3.514    | N(6)  | H(8) <sup>31</sup>   | 3.52(2)  |
| C(1)  | C(19) <sup>81</sup>  | 3.494(4) | C(8)  | C(19) <sup>31</sup>  | 3.572(4) |
| C(9)  | C(14) <sup>81</sup>  | 3.446(4) | C(10) | C(14) <sup>81</sup>  | 3.461(4) |
| C(10) | H(7) <sup>81</sup>   | 3.30(2)  | C(10) | H(18) <sup>51</sup>  | 2.996    |
| C(12) | H(5) <sup>81</sup>   | 3.05(2)  | C(12) | H(6) <sup>31</sup>   | 3.54(2)  |
| C(13) | H(5) <sup>81</sup>   | 3.49(2)  | C(13) | H(12) <sup>51</sup>  | 3.122    |
| C(13) | H(18) <sup>51</sup>  | 3.147    | C(14) | O(3) <sup>81</sup>   | 3.382(3) |
| C(14) | N(4) <sup>31</sup>   | 3.410(4) | C(14) | N(5) <sup>31</sup>   | 3.474(4) |
| C(14) | C(9) <sup>31</sup>   | 3.446(4) | C(14) | C(10) <sup>31</sup>  | 3.461(4) |
| C(15) | H(5) <sup>81</sup>   | 3.59(2)  | C(15) | H(6) <sup>81</sup>   | 3.60(2)  |
| C(15) | H(10) <sup>91</sup>  | 2.956    | C(15) | H(12) <sup>51</sup>  | 3.419    |
| C(15) | H(13) <sup>101</sup> | 3.349    | C(15) | H(17) <sup>101</sup> | 3.552    |
| C(16) | C(16) <sup>81</sup>  | 3.583(4) | C(16) | C(16) <sup>31</sup>  | 3.583(4) |
| C(16) | H(2) <sup>71</sup>   | 3.55(2)  | C(16) | H(12) <sup>81</sup>  | 3.446    |
| C(16) | H(13) <sup>31</sup>  | 3.323    | C(17) | O(3) <sup>111</sup>  | 3.416(3) |
| C(17) | H(7) <sup>81</sup>   | 3.49(2)  | C(17) | H(16) <sup>111</sup> | 3.342    |
| C(17) | H(19) <sup>91</sup>  | 3.197    | C(18) | O(2) <sup>101</sup>  | 3.495(4) |
| C(18) | N(1) <sup>91</sup>   | 3.464(5) | C(18) | H(4) <sup>81</sup>   | 3.20(2)  |
| C(18) | H(8) <sup>91</sup>   | 3.50(2)  | C(18) | H(10) <sup>91</sup>  | 3.269    |
| C(18) | H(12) <sup>51</sup>  | 3.485    | C(18) | H(13) <sup>101</sup> | 3.444    |
| C(19) | C(1) <sup>31</sup>   | 3.494(4) | C(19) | C(8) <sup>81</sup>   | 3.572(4) |
| C(20) | O(2) <sup>51</sup>   | 3.476(5) | C(20) | H(4) <sup>81</sup>   | 3.44(2)  |
| C(20) | H(12) <sup>51</sup>  | 3.030    | C(21) | C(22) <sup>21</sup>  | 3.590(5) |

Table 6. Distances beyond the asymmetric unit out to 3.60 Å (continued)

| atom  | atom                 | distance | atom  | atom                 | distance |
|-------|----------------------|----------|-------|----------------------|----------|
| C(21) | H(2) <sup>11</sup>   | 3.28(2)  | C(21) | H(10) <sup>8j</sup>  | 3.506    |
| C(22) | C(21) <sup>5j</sup>  | 3.590(5) | C(22) | H(6) <sup>3j</sup>   | 3.23(2)  |
| C(22) | H(12) <sup>5j</sup>  | 2.918    | C(22) | H(18) <sup>5j</sup>  | 3.117    |
| C(23) | H(4) <sup>8j</sup>   | 3.09(2)  | C(23) | H(8) <sup>9j</sup>   | 3.54(2)  |
| C(23) | H(12) <sup>5j</sup>  | 3.305    | C(23) | H(14) <sup>10j</sup> | 3.399    |
| C(24) | O(3) <sup>2j</sup>   | 3.453(4) | C(24) | H(2) <sup>1j</sup>   | 3.16(2)  |
| C(24) | H(5) <sup>2j</sup>   | 3.57(2)  | C(24) | H(7) <sup>12j</sup>  | 3.45(2)  |
| C(24) | H(15) <sup>7j</sup>  | 3.189    | H(1)  | O(2) <sup>10j</sup>  | 2.55(3)  |
| H(1)  | N(1) <sup>9j</sup>   | 3.15(3)  | H(1)  | H(4) <sup>8j</sup>   | 3.54(4)  |
| H(1)  | H(8) <sup>9j</sup>   | 3.14(4)  | H(1)  | H(9) <sup>10j</sup>  | 3.38(3)  |
| H(1)  | H(10) <sup>9j</sup>  | 3.232    | H(1)  | H(13) <sup>10j</sup> | 2.748    |
| H(1)  | H(14) <sup>10j</sup> | 3.338    | H(2)  | C(16) <sup>9j</sup>  | 3.55(2)  |
| H(2)  | C(21) <sup>10j</sup> | 3.28(2)  | H(2)  | C(24) <sup>10j</sup> | 3.16(2)  |
| H(2)  | H(6) <sup>8j</sup>   | 3.20(3)  | H(2)  | H(7) <sup>8j</sup>   | 3.33(3)  |
| H(2)  | H(10) <sup>9j</sup>  | 2.706    | H(2)  | H(13) <sup>10j</sup> | 2.586    |
| H(2)  | H(17) <sup>10j</sup> | 2.602    | H(2)  | H(18) <sup>10j</sup> | 3.258    |
| H(3)  | O(2) <sup>5j</sup>   | 3.40(2)  | H(3)  | O(3) <sup>5j</sup>   | 3.05(2)  |
| H(3)  | H(4) <sup>8j</sup>   | 3.37(3)  | H(3)  | H(8) <sup>9j</sup>   | 3.12(3)  |
| H(3)  | H(14) <sup>10j</sup> | 2.780    | H(3)  | H(16) <sup>13j</sup> | 3.236    |
| H(4)  | O(2) <sup>5j</sup>   | 2.95(2)  | H(4)  | C(18) <sup>3j</sup>  | 3.20(2)  |
| H(4)  | C(20) <sup>3j</sup>  | 3.44(2)  | H(4)  | C(23) <sup>3j</sup>  | 3.09(2)  |
| H(4)  | H(1) <sup>3j</sup>   | 3.54(4)  | H(4)  | H(3) <sup>3j</sup>   | 3.37(3)  |
| H(4)  | H(12) <sup>5j</sup>  | 3.343    | H(4)  | H(13) <sup>5j</sup>  | 3.585    |
| H(5)  | C(12) <sup>3j</sup>  | 3.05(2)  | H(5)  | C(13) <sup>3j</sup>  | 3.49(2)  |
| H(5)  | C(15) <sup>3j</sup>  | 3.59(2)  | H(5)  | C(24) <sup>5j</sup>  | 3.57(2)  |
| H(5)  | H(6) <sup>3j</sup>   | 2.22(3)  | H(5)  | H(7) <sup>3j</sup>   | 3.59(3)  |
| H(5)  | H(12) <sup>5j</sup>  | 3.204    | H(5)  | H(18) <sup>5j</sup>  | 2.833    |
| H(6)  | C(12) <sup>8j</sup>  | 3.54(2)  | H(6)  | C(15) <sup>3j</sup>  | 3.60(2)  |
| H(6)  | C(22) <sup>8j</sup>  | 3.23(2)  | H(6)  | H(2) <sup>3j</sup>   | 3.20(3)  |
| H(6)  | H(5) <sup>8j</sup>   | 2.22(3)  | H(7)  | O(3) <sup>8j</sup>   | 2.81(2)  |
| H(7)  | N(4) <sup>3j</sup>   | 3.00(2)  | H(7)  | N(5) <sup>3j</sup>   | 3.00(2)  |
| H(7)  | C(10) <sup>3j</sup>  | 3.30(2)  | H(7)  | C(17) <sup>3j</sup>  | 3.49(2)  |
| H(7)  | C(24) <sup>13j</sup> | 3.45(2)  | H(7)  | H(2) <sup>3j</sup>   | 3.33(3)  |
| H(7)  | H(5) <sup>8j</sup>   | 3.59(3)  | H(7)  | H(14) <sup>3j</sup>  | 3.296    |
| H(7)  | H(15) <sup>3j</sup>  | 3.509    | H(7)  | H(17) <sup>13j</sup> | 3.127    |
| H(7)  | H(18) <sup>13j</sup> | 2.890    | H(8)  | O(3) <sup>8j</sup>   | 3.39(2)  |
| H(8)  | N(4) <sup>3j</sup>   | 3.46(2)  | H(8)  | N(6) <sup>8j</sup>   | 3.52(2)  |

Table 6. Distances beyond the asymmetric unit out to 3.60 Å (continued)

| atom  | atom                 | distance | atom  | atom                | distance |
|-------|----------------------|----------|-------|---------------------|----------|
| H(8)  | C(18) <sup>7j</sup>  | 3.50(2)  | H(8)  | C(23) <sup>7j</sup> | 3.54(2)  |
| H(8)  | H(1) <sup>7j</sup>   | 3.14(4)  | H(8)  | H(3) <sup>7j</sup>  | 3.12(3)  |
| H(8)  | H(9) <sup>8j</sup>   | 3.60(3)  | H(8)  | H(14) <sup>3j</sup> | 3.400    |
| H(9)  | H(1) <sup>1j</sup>   | 3.38(3)  | H(9)  | H(8) <sup>3j</sup>  | 3.60(3)  |
| H(10) | N(5) <sup>7j</sup>   | 3.484    | H(10) | C(15) <sup>7j</sup> | 2.956    |
| H(10) | C(18) <sup>7j</sup>  | 3.269    | H(10) | C(21) <sup>3j</sup> | 3.506    |
| H(10) | H(1) <sup>7j</sup>   | 3.232    | H(10) | H(2) <sup>7j</sup>  | 2.706    |
| H(10) | H(12) <sup>8j</sup>  | 3.195    | H(10) | H(13) <sup>3j</sup> | 2.963    |
| H(10) | H(17) <sup>3j</sup>  | 2.929    | H(12) | C(13) <sup>2j</sup> | 3.122    |
| H(12) | C(15) <sup>2j</sup>  | 3.419    | H(12) | C(16) <sup>3j</sup> | 3.446    |
| H(12) | C(18) <sup>2j</sup>  | 3.485    | H(12) | C(20) <sup>2j</sup> | 3.030    |
| H(12) | C(22) <sup>2j</sup>  | 2.918    | H(12) | C(23) <sup>2j</sup> | 3.305    |
| H(12) | H(4) <sup>2j</sup>   | 3.343    | H(12) | H(5) <sup>2j</sup>  | 3.204    |
| H(12) | H(10) <sup>3j</sup>  | 3.195    | H(13) | N(1) <sup>8j</sup>  | 3.419    |
| H(13) | C(15) <sup>1j</sup>  | 3.349    | H(13) | C(16) <sup>8j</sup> | 3.323    |
| H(13) | C(18) <sup>1j</sup>  | 3.444    | H(13) | H(1) <sup>1j</sup>  | 2.748    |
| H(13) | H(2) <sup>1j</sup>   | 2.586    | H(13) | H(4) <sup>2j</sup>  | 3.585    |
| H(13) | H(10) <sup>8j</sup>  | 2.963    | H(14) | O(3) <sup>14j</sup> | 3.591    |
| H(14) | O(3) <sup>11j</sup>  | 3.526    | H(14) | C(23) <sup>1j</sup> | 3.399    |
| H(14) | H(1) <sup>1j</sup>   | 3.338    | H(14) | H(3) <sup>1j</sup>  | 2.780    |
| H(14) | H(7) <sup>8j</sup>   | 3.296    | H(14) | H(8) <sup>8j</sup>  | 3.400    |
| H(14) | H(16) <sup>11j</sup> | 2.820    | H(15) | O(3) <sup>11j</sup> | 3.153    |
| H(15) | C(24) <sup>9j</sup>  | 3.189    | H(15) | H(7) <sup>8j</sup>  | 3.509    |
| H(15) | H(16) <sup>11j</sup> | 3.051    | H(15) | H(17) <sup>9j</sup> | 3.376    |
| H(15) | H(17) <sup>10j</sup> | 2.876    | H(15) | H(18) <sup>9j</sup> | 3.490    |
| H(15) | H(19) <sup>9j</sup>  | 2.352    | H(16) | O(3) <sup>11j</sup> | 3.030    |
| H(16) | C(17) <sup>4j</sup>  | 3.342    | H(16) | H(3) <sup>12j</sup> | 3.236    |
| H(16) | H(14) <sup>4j</sup>  | 2.820    | H(16) | H(15) <sup>4j</sup> | 3.051    |
| H(16) | H(19) <sup>9j</sup>  | 3.323    | H(17) | N(5) <sup>1j</sup>  | 3.390    |
| H(17) | C(15) <sup>1j</sup>  | 3.552    | H(17) | H(2) <sup>1j</sup>  | 2.602    |
| H(17) | H(7) <sup>12j</sup>  | 3.127    | H(17) | H(10) <sup>8j</sup> | 2.929    |
| H(17) | H(15) <sup>7j</sup>  | 3.376    | H(17) | H(15) <sup>1j</sup> | 2.876    |
| H(17) | H(19) <sup>8j</sup>  | 3.029    | H(18) | O(3) <sup>2j</sup>  | 2.898    |
| H(18) | N(5) <sup>2j</sup>   | 3.117    | H(18) | C(10) <sup>2j</sup> | 2.996    |
| H(18) | C(13) <sup>2j</sup>  | 3.147    | H(18) | C(22) <sup>2j</sup> | 3.117    |
| H(18) | H(2) <sup>1j</sup>   | 3.258    | H(18) | H(5) <sup>2j</sup>  | 2.833    |
| H(18) | H(7) <sup>12j</sup>  | 2.890    | H(18) | H(15) <sup>7j</sup> | 3.490    |

Table 6. Distances beyond the asymmetric unit out to 3.60 Å (continued)

| atom  | atom                | distance | atom  | atom                | distance |
|-------|---------------------|----------|-------|---------------------|----------|
| H(19) | O(3) <sup>2)</sup>  | 3.323    | H(19) | N(5) <sup>7)</sup>  | 3.514    |
| H(19) | C(17) <sup>7)</sup> | 3.197    | H(19) | H(15) <sup>7)</sup> | 2.352    |
| H(19) | H(16) <sup>7)</sup> | 3.323    | H(19) | H(17) <sup>3)</sup> | 3.029    |

Symmetry Operators:

- |                          |                             |
|--------------------------|-----------------------------|
| (1) -X,-Y,Z+1/2-1        | (2) -X+1,-Y,Z+1/2-1         |
| (3) X+1/2,-Y+1/2,Z       | (4) X+1/2,-Y+1/2-1,Z        |
| (5) -X+1,-Y,Z+1/2        | (6) X+1,Y,Z                 |
| (7) -X+1/2,Y+1/2,Z+1/2-1 | (8) X+1/2-1,-Y+1/2,Z        |
| (9) -X+1/2,Y+1/2-1,Z+1/2 | (10) -X,-Y,Z+1/2            |
| (11) X+1/2-1,-Y+1/2-1,Z  | (12) -X+1/2,Y+1/2-1,Z+1/2-1 |
| (13) -X+1/2,Y+1/2,Z+1/2  | (14) X-1,Y,Z                |

Table 7. Intramolecular and Intermolecular Hydrogen bonds

| D    | H    | A    | D...A    | D-H     | H...A   | D-H...A |
|------|------|------|----------|---------|---------|---------|
| N(6) | H(9) | O(2) | 2.824(3) | 0.80(2) | 2.21(2) | 134(2)  |

- Note) 1. The symmetry operations are applied to the acceptors.  
 2. Estimated standard deviations (esd's) are shown in the parentheses.  
 They are not calculated when all atoms have an esd=0.0.
