# Supplementary material for: Thiadiazino-indole, thiadiazino-carbazole and benzothiadiazino-carbazole dioxides: synthesis, physicochemical and early ADME characterization of representatives of new tri-, tetra- and pentacyclic ring systems and their intermediates
Source: publisher site journal article supplement (doi:10.3762/bjoc.21.169), 2025-10-21
Supplement: Additional file 2 [file 7i_xrd.pdf › Átnevezett XRD/7i_xrd.pdf]

**143675**

**PGY0789\_1A**

Submitted by: Pusztai Gyongyver  
Operator: Dancso Andras

X-ray Structure Report

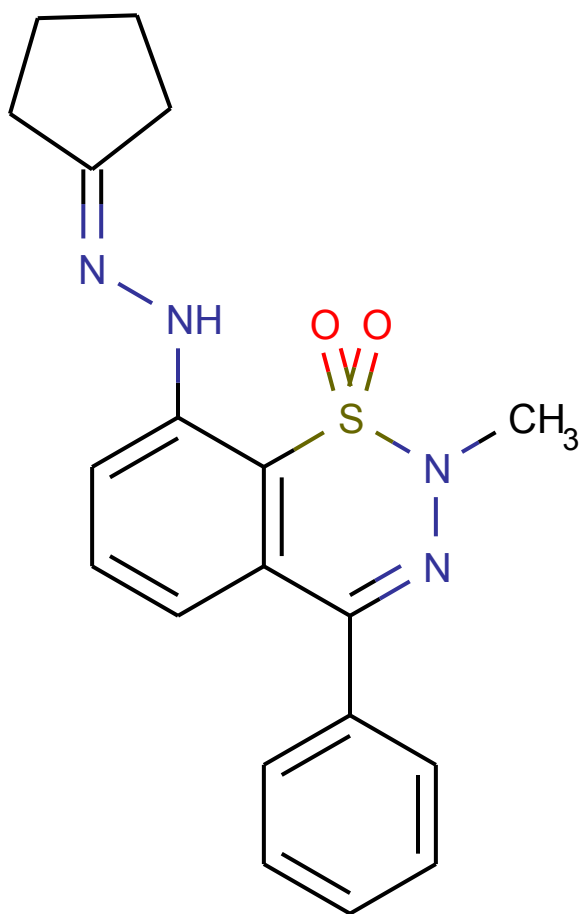

November 28, 2024

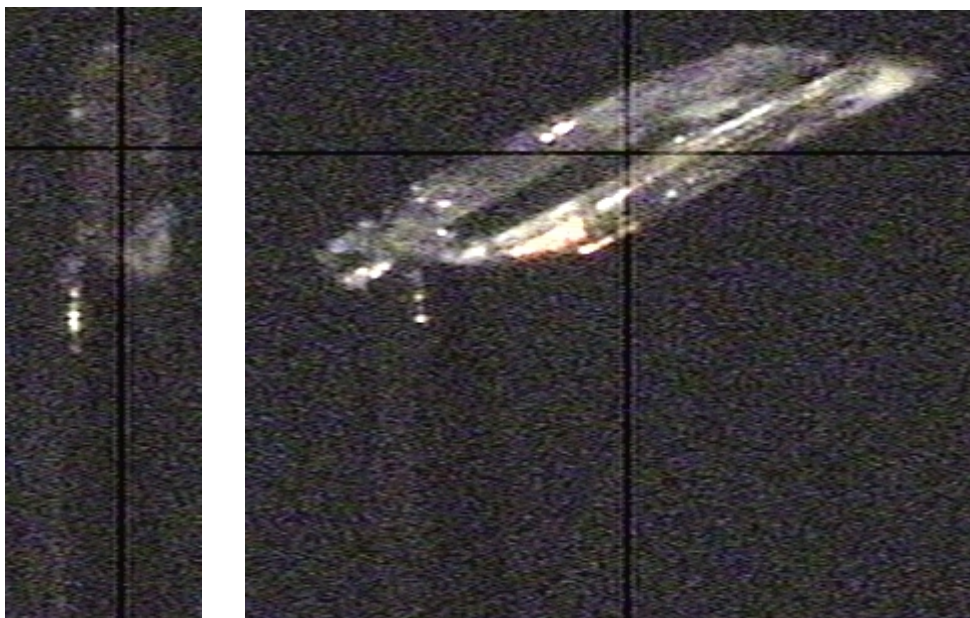

Fig. 1. The crystal

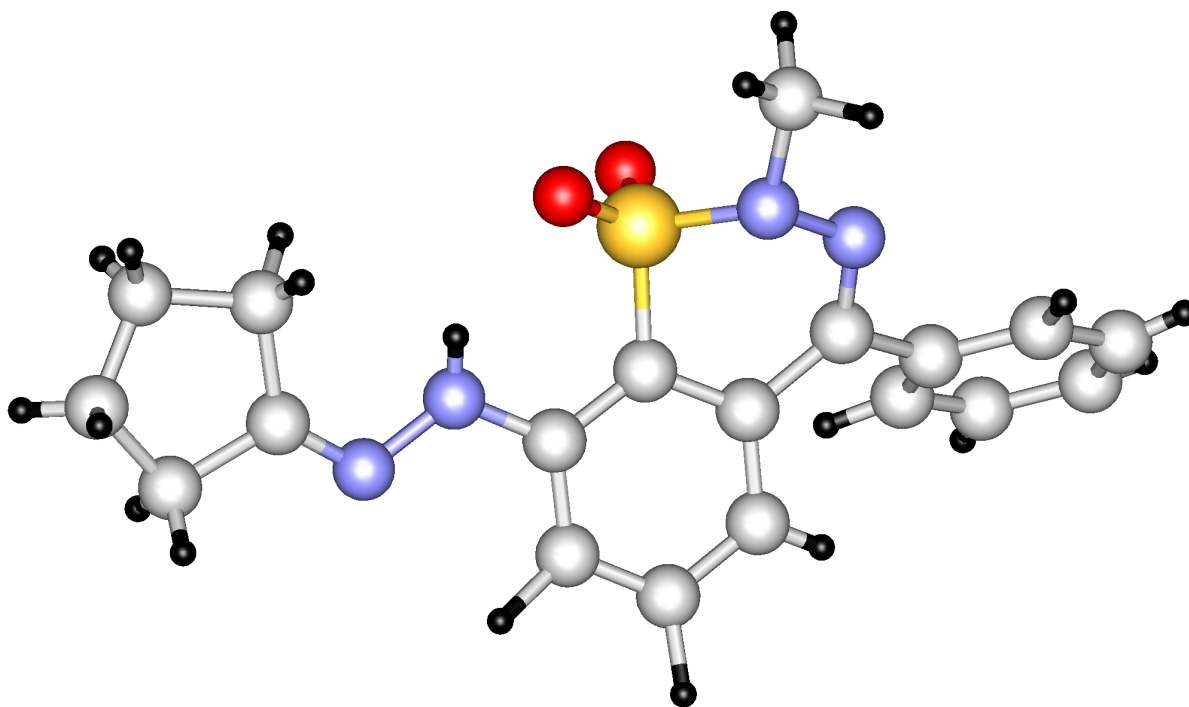

Fig. 2. The molecule (some hydrogens were generated by the software)

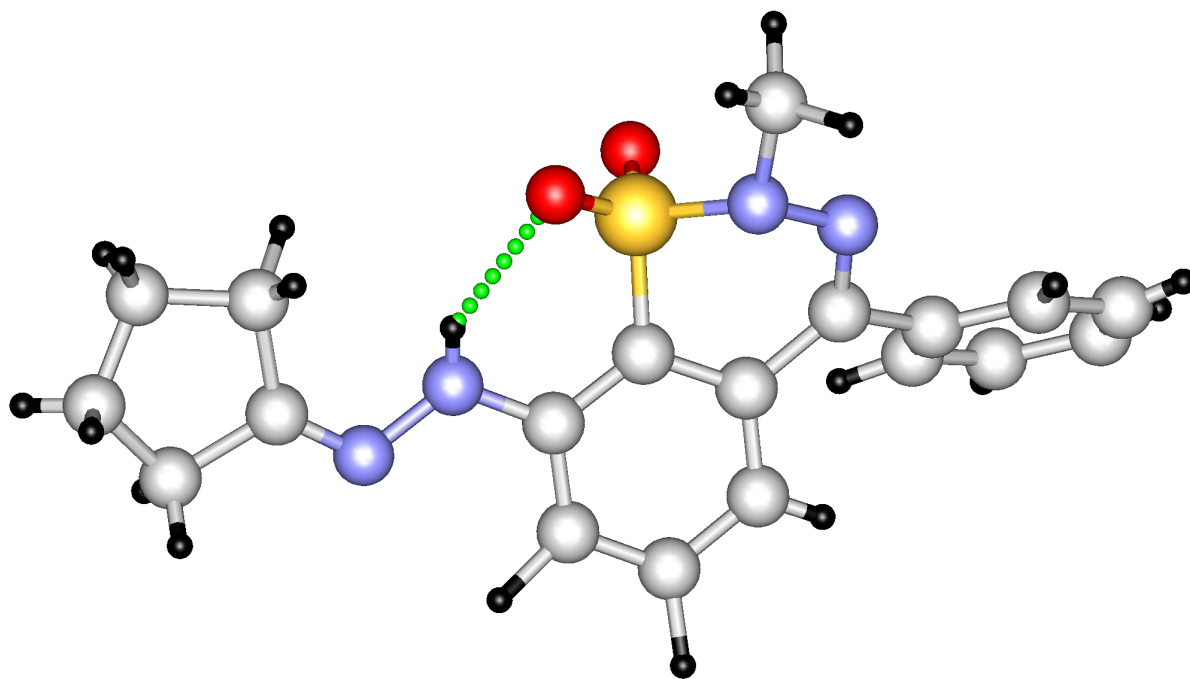

Fig. 3. Hydrogen bond

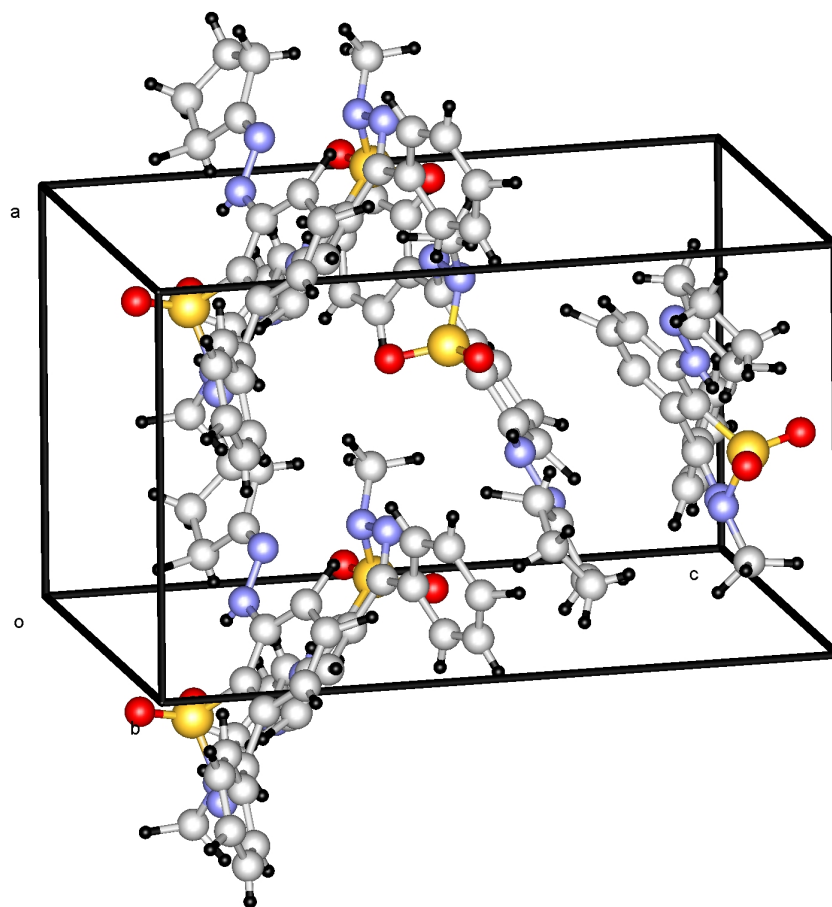

Fig. 4. Packing

## *Experimental*

### Data Collection

A colorless chunk crystal of  $C_{19}H_{20}N_4O_2S$  having approximate dimensions of 0.66 x 0.20 x 0.14 mm was mounted on a cactus needle. All measurements were made on a Rigaku RAXIS RAPID imaging plate area detector with graphite monochromated Cu-K $\alpha$  radiation.

Indexing was performed from 4 oscillations that were exposed for 60 seconds. The crystal-to-detector distance was 127.40 mm.

Cell constants and an orientation matrix for data collection corresponded to a primitive orthorhombic cell with dimensions:

$$\begin{aligned}a &= 10.0402(4) \text{ \AA} \\b &= 10.9583(4) \text{ \AA} \\c &= 16.5846(8) \text{ \AA} \\V &= 1824.70(13) \text{ \AA}^3\end{aligned}$$

For  $Z = 4$  and F.W. = 368.45, the calculated density is 1.341 g/cm<sup>3</sup>. The systematic absences of:

$$\begin{aligned}h00: h \pm 2n \\0k0: k \pm 2n \\00l: l \pm 2n\end{aligned}$$

uniquely determine the space group to be:

$$P2_12_12_1 \text{ (\#19)}$$

The data were collected at a temperature of  $20 \pm 1^\circ\text{C}$  to a maximum  $2\theta$  value of  $143.2^\circ$ . A total of 180 oscillation images were collected. A sweep of data was done using  $\omega$  scans from  $20.0$  to  $200.0^\circ$  in  $5.0^\circ$  step, at  $\chi=0.0^\circ$  and  $\phi = 0.0^\circ$ . The exposure rate was 36.0 [sec./ $^\circ$ ]. A second sweep was performed using  $\omega$  scans from  $20.0$  to  $200.0^\circ$  in  $5.0^\circ$  step, at  $\chi=54.0^\circ$  and  $\phi = 0.0^\circ$ . The exposure rate was 36.0 [sec./ $^\circ$ ]. Another sweep was performed using  $\omega$  scans from  $20.0$  to  $200.0^\circ$  in  $5.0^\circ$  step, at  $\chi=54.0^\circ$  and  $\phi = 90.0^\circ$ . The exposure rate was 36.0 [sec./ $^\circ$ ]. Another sweep was performed using  $\omega$  scans from  $20.0$  to  $200.0^\circ$  in  $5.0^\circ$  step, at  $\chi=54.0^\circ$  and  $\phi = 180.0^\circ$ . The exposure rate was 36.0 [sec./ $^\circ$ ]. Another sweep was performed using  $\omega$  scans from  $20.0$  to  $200.0^\circ$  in  $5.0^\circ$  step, at  $\chi=54.0^\circ$  and  $\phi = 270.0^\circ$ . The exposure rate was 36.0 [sec./ $^\circ$ ]. The crystal-to-detector distance was 127.40 mm. Readout was performed in the 0.100 mm pixel mode.

## Data Reduction

Of the 21313 reflections that were collected, 3511 were unique ( $R_{\text{int}} = 0.053$ ).

The linear absorption coefficient,  $\mu$ , for Cu-K $\alpha$  radiation is 17.519 cm<sup>-1</sup>. An empirical absorption correction was applied which resulted in transmission factors ranging from 0.537 to 0.776. The data were corrected for Lorentz and polarization effects.

## Structure Solution and Refinement

The structure was solved by direct methods<sup>1</sup> and expanded using Fourier techniques<sup>2</sup>. The non-hydrogen atoms were refined anisotropically. Some hydrogen atoms were refined isotropically and the rest were refined using the riding model. The final cycle of full-matrix least-squares refinement<sup>3</sup> on F was based on 17378 observed reflections ( $I > 2.00\sigma(I)$ ) and 294 variable parameters and converged (largest parameter shift was 0.00 times its esd) with unweighted and weighted agreement factors of:

$$R = \Sigma ||F_o| - |F_c|| / \Sigma |F_o| = 0.0504$$

$$R_w = [ \Sigma w (|F_o| - |F_c|)^2 / \Sigma w F_o^2 ]^{1/2} = 0.0519$$

The standard deviation of an observation of unit weight<sup>4</sup> was 2.96. Unit weights were used. Plots of  $\Sigma w (|F_o| - |F_c|)^2$  versus  $|F_o|$ , reflection order in data collection,  $\sin \theta/\lambda$  and various classes of indices showed no unusual trends. The maximum and minimum peaks on the final difference Fourier map corresponded to 5.04 and -5.09 e<sup>-</sup>/Å<sup>3</sup>, respectively.

Neutral atom scattering factors were taken from Cromer and Waber<sup>5</sup>. Anomalous dispersion effects were included in Fcalc<sup>6</sup>; the values for  $\Delta f'$  and  $\Delta f''$  were those of Creagh and McAuley<sup>7</sup>. The values for the mass attenuation coefficients are those of Creagh and Hubbell<sup>8</sup>. All calculations were performed using the CrystalStructure<sup>9,10</sup> crystallographic software package.

## *References*

- (1) SIR92: Altomare, A., Cascarano, G., Giacovazzo, C., Guagliardi, A., Burla, M., Polidori, G., and Camalli, M. (1994) J. Appl. Cryst., 27, 435.
- (2) DIRDIF99: Beurskens, P.T., Admiraal, G., Beurskens, G., Bosman, W.P., de Gelder, R., Israel, R. and Smits, J.M.M. (1999). The DIRDIF-99 program system, Technical Report of the Crystallography Laboratory, University of Nijmegen, The Netherlands.

(3) Least Squares function minimized:

$$\sum w(|F_o| - |F_c|)^2 \quad \text{where } w = \text{Least Squares weights.}$$

(4) Standard deviation of an observation of unit weight:

$$[\sum w(|F_o| - |F_c|)^2 / (N_o - N_v)]^{1/2}$$

where:  $N_o$  = number of observations

$N_v$  = number of variables

(5) Cromer, D. T. & Waber, J. T.; "International Tables for X-ray Crystallography", Vol. IV, The Kynoch Press, Birmingham, England, Table 2.2 A (1974).

(6) Ibers, J. A. & Hamilton, W. C.; Acta Crystallogr., 17, 781 (1964).

(7) Creagh, D. C. & McAuley, W.J. .; "International Tables for Crystallography", Vol C, (A.J.C. Wilson, ed.), Kluwer Academic Publishers, Boston, Table 4.2.6.8, pages 219-222 (1992).

(8) Creagh, D. C. & Hubbell, J.H.; "International Tables for Crystallography", Vol C, (A.J.C. Wilson, ed.), Kluwer Academic Publishers, Boston, Table 4.2.4.3, pages 200-206 (1992).

(9) CrystalStructure 3.7.0: Crystal Structure Analysis Package, Rigaku and Rigaku/MSK (2000-2005). 9009 New Trails Dr. The Woodlands TX 77381 USA.

(10) CRYSTALS Issue 10: Watkin, D.J., Prout, C.K. Carruthers, J.R. & Betteridge, P.W. Chemical Crystallography Laboratory, Oxford, UK. (1996)



## EXPERIMENTAL DETAILS

### A. Crystal Data

|                         |                                                                                                                                 |
|-------------------------|---------------------------------------------------------------------------------------------------------------------------------|
| Empirical Formula       | $\text{C}_{19}\text{H}_{20}\text{N}_4\text{O}_2\text{S}$                                                                        |
| Formula Weight          | 368.45                                                                                                                          |
| Crystal Color, Habit    | colorless, chunk                                                                                                                |
| Crystal Dimensions      | 0.66 X 0.20 X 0.14 mm                                                                                                           |
| Crystal System          | orthorhombic                                                                                                                    |
| Lattice Type            | Primitive                                                                                                                       |
| Indexing Images         | 4 oscillations @ 60.0 seconds                                                                                                   |
| Detector Position       | 127.40 mm                                                                                                                       |
| Pixel Size              | 0.100 mm                                                                                                                        |
| Lattice Parameters      | $a = 10.0402(4) \text{ \AA}$<br>$b = 10.9583(4) \text{ \AA}$<br>$c = 16.5846(8) \text{ \AA}$<br>$V = 1824.70(13) \text{ \AA}^3$ |
| Space Group             | $P2_12_12_1$ (#19)                                                                                                              |
| Z value                 | 4                                                                                                                               |
| $D_{\text{calc}}$       | $1.341 \text{ g/cm}^3$                                                                                                          |
| $F_{000}$               | 776.00                                                                                                                          |
| $\mu(\text{CuK}\alpha)$ | $17.519 \text{ cm}^{-1}$                                                                                                        |

## B. Intensity Measurements

|                                                           |                                                                       |
|-----------------------------------------------------------|-----------------------------------------------------------------------|
| Diffractometer                                            | Rigaku RAXIS-RAPID                                                    |
| Radiation                                                 | CuK $\alpha$ ( $\lambda$ = 1.54187 Å)<br>graphite monochromated       |
| Detector Aperture                                         | 280 mm x 256 mm                                                       |
| Data Images                                               | 180 exposures                                                         |
| $\omega$ oscillation Range ( $\chi$ =0.0, $\phi$ =0.0)    | 20.0 - 200.0 $^{\circ}$                                               |
| Exposure Rate                                             | 36.0 sec./ $^{\circ}$                                                 |
| $\omega$ oscillation Range ( $\chi$ =54.0, $\phi$ =0.0)   | 20.0 - 200.0 $^{\circ}$                                               |
| Exposure Rate                                             | 36.0 sec./ $^{\circ}$                                                 |
| $\omega$ oscillation Range ( $\chi$ =54.0, $\phi$ =90.0)  | 20.0 - 200.0 $^{\circ}$                                               |
| Exposure Rate                                             | 36.0 sec./ $^{\circ}$                                                 |
| $\omega$ oscillation Range ( $\chi$ =54.0, $\phi$ =180.0) | 20.0 - 200.0 $^{\circ}$                                               |
| Exposure Rate                                             | 36.0 sec./ $^{\circ}$                                                 |
| $\omega$ oscillation Range ( $\chi$ =54.0, $\phi$ =270.0) | 20.0 - 200.0 $^{\circ}$                                               |
| Exposure Rate                                             | 36.0 sec./ $^{\circ}$                                                 |
| Detector Position                                         | 127.40 mm                                                             |
| Pixel Size                                                | 0.100 mm                                                              |
| $2\theta_{\text{max}}$                                    | 143.2 $^{\circ}$                                                      |
| No. of Reflections Measured                               | Total: 21313<br>Unique: 3511 ( $R_{\text{int}}$ = 0.053)              |
| Corrections                                               | Lorentz-polarization<br>Absorption<br>(trans. factors: 0.537 - 0.776) |

### C. Structure Solution and Refinement

|                                          |                                |
|------------------------------------------|--------------------------------|
| Structure Solution                       | Direct Methods (SIR92)         |
| Refinement                               | Full-matrix least-squares on F |
| Function Minimized                       | $\Sigma w ( Fo  -  Fc )^2$     |
| Least Squares Weights                    | 1                              |
| $2\theta_{\text{max}}$ cutoff            | 143.2 $^{\circ}$               |
| Anomalous Dispersion                     | All non-hydrogen atoms         |
| No. Observations ( $I > 2.00\sigma(I)$ ) | 17378                          |
| No. Variables                            | 294                            |
| Reflection/Parameter Ratio               | 59.11                          |
| Residuals: R ( $I > 2.00\sigma(I)$ )     | 0.0504                         |
| Residuals: Rw ( $I > 2.00\sigma(I)$ )    | 0.0519                         |
| Goodness of Fit Indicator                | 2.959                          |
| Max Shift/Error in Final Cycle           | 0.000                          |
| Maximum peak in Final Diff. Map          | 5.04 e $^{-}/\text{\AA}^3$     |
| Minimum peak in Final Diff. Map          | -5.09 e $^{-}/\text{\AA}^3$    |

Table 1. Atomic coordinates and  $B_{\text{iso}}/B_{\text{eq}}$

| atom  | x            | y           | z           | $B_{\text{eq}}$ |
|-------|--------------|-------------|-------------|-----------------|
| S(1)  | -0.08530(6)  | 0.84113(5)  | 0.07196(4)  | 4.143(14)       |
| O(2)  | -0.05504(14) | 0.86907(12) | -0.01063(9) | 4.87(4)         |
| O(3)  | -0.08526(16) | 0.71556(12) | 0.09528(9)  | 5.37(4)         |
| N(4)  | -0.24639(17) | 1.02471(14) | 0.08310(11) | 3.93(4)         |
| N(5)  | -0.23158(18) | 0.89895(14) | 0.09964(11) | 4.25(5)         |
| N(6)  | 0.2804(2)    | 0.7192(2)   | 0.19927(12) | 5.26(5)         |
| N(7)  | 0.1652(2)    | 0.7622(2)   | 0.16304(14) | 5.35(6)         |
| C(8)  | -0.1631(2)   | 1.2246(2)   | 0.08012(14) | 4.16(6)         |
| C(9)  | 0.1268(2)    | 0.8812(2)   | 0.17411(14) | 4.17(6)         |
| C(10) | -0.0242(2)   | 1.0511(2)   | 0.14269(13) | 3.80(5)         |
| C(11) | 0.1654(2)    | 1.0823(2)   | 0.23003(17) | 5.44(7)         |
| C(12) | 0.3005(2)    | 0.6054(2)   | 0.19040(16) | 4.77(7)         |
| C(13) | -0.2863(2)   | 1.2815(2)   | 0.08598(18) | 5.30(7)         |
| C(14) | -0.1474(2)   | 1.09368(19) | 0.10326(13) | 3.66(5)         |
| C(15) | 0.0146(2)    | 0.9281(2)   | 0.13570(12) | 3.78(5)         |
| C(16) | 0.2032(2)    | 0.9616(2)   | 0.22111(16) | 4.98(7)         |
| C(17) | 0.4257(2)    | 0.5452(2)   | 0.22257(14) | 6.10(8)         |
| C(18) | -0.3005(3)   | 1.3999(2)   | 0.0565(2)   | 6.85(9)         |
| C(19) | -0.1952(3)   | 1.4612(2)   | 0.0203(2)   | 6.79(9)         |
| C(20) | 0.0522(2)    | 1.1268(2)   | 0.19010(17) | 4.94(7)         |
| C(21) | -0.0584(2)   | 1.2876(2)   | 0.04478(18) | 5.60(7)         |
| C(22) | -0.3503(2)   | 0.8294(2)   | 0.0734(2)   | 5.69(8)         |
| C(23) | 0.2166(3)    | 0.5111(2)   | 0.1463(2)   | 5.79(9)         |
| C(24) | -0.0751(3)   | 1.4043(2)   | 0.01528(18) | 6.80(9)         |
| C(25) | 0.2981(3)    | 0.3969(2)   | 0.1477(2)   | 11.35(13)       |
| C(26) | 0.4032(3)    | 0.4122(2)   | 0.2072(2)   | 8.41(10)        |
| H(1)  | 0.283(2)     | 0.9183(18)  | 0.2694(12)  | 6.4(5)          |
| H(2)  | 0.209(2)     | 1.132(2)    | 0.2888(17)  | 13.1(10)        |
| H(3)  | 0.0297(16)   | 1.2057(16)  | 0.1923(10)  | 2.8(4)          |
| H(4)  | -0.3617(16)  | 1.2384(15)  | 0.1136(10)  | 3.0(4)          |
| H(5)  | -0.3813(18)  | 1.4252(16)  | 0.0549(11)  | 3.2(5)          |
| H(6)  | -0.216(2)    | 1.538(2)    | -0.0227(15) | 10.6(8)         |
| H(7)  | 0.031(2)     | 1.2521(18)  | 0.0461(12)  | 6.2(6)          |
| H(8)  | -0.431(2)    | 0.869(2)    | 0.1131(16)  | 10.8(10)        |
| H(9)  | -0.3507(17)  | 0.7534(16)  | 0.0917(11)  | 3.1(5)          |
| H(10) | -0.362(2)    | 0.826(2)    | 0.0035(16)  | 10.1(9)         |
| H(11) | 0.1106(16)   | 0.7184(15)  | 0.1445(10)  | 1.8(4)          |

Table 1. Atomic coordinates and  $B_{\text{iso}}/B_{\text{eq}}$  (continued)

| atom  | x          | y          | z          | $B_{\text{eq}}$ |
|-------|------------|------------|------------|-----------------|
| H(12) | 0.1464(18) | 0.5044(19) | 0.1626(13) | 3.3(6)          |
| H(13) | 0.196(2)   | 0.5404(19) | 0.0753(14) | 6.7(6)          |
| H(14) | 0.5025     | 0.5740     | 0.1950     | 7.31            |
| H(15) | 0.4352     | 0.5601     | 0.2787     | 7.31            |
| H(16) | -0.0024    | 1.4489     | -0.0065    | 8.15            |
| H(17) | 0.2443     | 0.3276     | 0.1588     | 13.63           |
| H(18) | 0.3378     | 0.3881     | 0.0960     | 13.69           |
| H(19) | 0.4820     | 0.3724     | 0.1895     | 10.12           |
| H(20) | 0.3734     | 0.3760     | 0.2560     | 10.16           |

$$B_{\text{eq}} = 8/3 \pi^2 (U_{11}(aa^*)^2 + U_{22}(bb^*)^2 + U_{33}(cc^*)^2 + 2U_{12}(aa^*bb^*)\cos \gamma + 2U_{13}(aa^*cc^*)\cos \beta + 2U_{23}(bb^*cc^*)\cos \alpha)$$

Table 2. Anisotropic displacement parameters

| atom  | U <sub>11</sub> | U <sub>22</sub> | U <sub>33</sub> | U <sub>12</sub> | U <sub>13</sub> | U <sub>23</sub> |
|-------|-----------------|-----------------|-----------------|-----------------|-----------------|-----------------|
| S(1)  | 0.0601(3)       | 0.0402(2)       | 0.0571(4)       | 0.0024(3)       | -0.0095(3)      | -0.0042(3)      |
| O(2)  | 0.0714(11)      | 0.0628(10)      | 0.0508(10)      | 0.0116(8)       | -0.0053(9)      | -0.0094(8)      |
| O(3)  | 0.0786(10)      | 0.0382(8)       | 0.0872(13)      | -0.0057(9)      | -0.0197(11)     | 0.0014(8)       |
| N(4)  | 0.0474(12)      | 0.0436(10)      | 0.0582(13)      | -0.0005(9)      | 0.0004(10)      | -0.0043(10)     |
| N(5)  | 0.0495(11)      | 0.0429(11)      | 0.0690(15)      | -0.0076(9)      | 0.0006(11)      | 0.0032(10)      |
| N(6)  | 0.0600(13)      | 0.0598(13)      | 0.0802(17)      | 0.0105(13)      | -0.0204(13)     | -0.0029(13)     |
| N(7)  | 0.0630(15)      | 0.0526(15)      | 0.0876(19)      | 0.0017(12)      | -0.0285(14)     | -0.0053(13)     |
| C(8)  | 0.0550(14)      | 0.0465(13)      | 0.0565(17)      | 0.0011(12)      | -0.0021(14)     | -0.0104(13)     |
| C(9)  | 0.0552(16)      | 0.0488(14)      | 0.0546(17)      | 0.0039(12)      | -0.0041(13)     | 0.0011(13)      |
| C(10) | 0.0511(14)      | 0.0437(14)      | 0.0495(16)      | -0.0018(11)     | -0.0021(12)     | -0.0044(12)     |
| C(11) | 0.0729(19)      | 0.0704(19)      | 0.063(2)        | -0.0015(16)     | -0.0184(16)     | -0.0115(15)     |
| C(12) | 0.0591(17)      | 0.0649(18)      | 0.0572(19)      | 0.0107(15)      | -0.0024(15)     | 0.0071(15)      |
| C(13) | 0.0663(18)      | 0.0526(15)      | 0.083(2)        | -0.0007(15)     | 0.0125(18)      | 0.0002(16)      |
| C(14) | 0.0540(15)      | 0.0385(13)      | 0.0464(16)      | 0.0016(11)      | 0.0016(12)      | -0.0081(11)     |
| C(15) | 0.0515(14)      | 0.0438(13)      | 0.0482(15)      | -0.0036(11)     | -0.0063(12)     | -0.0040(12)     |
| C(16) | 0.0655(18)      | 0.0610(18)      | 0.0628(19)      | 0.0072(15)      | -0.0212(15)     | -0.0056(14)     |
| C(17) | 0.0776(19)      | 0.0762(19)      | 0.078(2)        | 0.0210(18)      | -0.0134(17)     | 0.0044(16)      |
| C(18) | 0.079(2)        | 0.058(2)        | 0.123(3)        | 0.0222(18)      | -0.011(2)       | -0.0044(19)     |
| C(19) | 0.107(2)        | 0.0490(18)      | 0.102(2)        | -0.0063(19)     | -0.022(2)       | 0.0017(18)      |
| C(20) | 0.0712(19)      | 0.0451(16)      | 0.071(2)        | 0.0006(14)      | -0.0033(15)     | -0.0136(14)     |
| C(21) | 0.0576(18)      | 0.0549(16)      | 0.100(2)        | -0.0006(14)     | -0.0011(16)     | 0.0080(15)      |
| C(22) | 0.0733(19)      | 0.0523(17)      | 0.090(2)        | -0.0188(16)     | -0.014(2)       | 0.008(2)        |
| C(23) | 0.059(2)        | 0.0601(19)      | 0.101(3)        | 0.0061(18)      | -0.006(2)       | -0.0024(18)     |
| C(24) | 0.092(2)        | 0.0609(19)      | 0.106(2)        | -0.0172(18)     | -0.010(2)       | 0.0189(17)      |
| C(25) | 0.131(3)        | 0.065(2)        | 0.234(4)        | 0.026(2)        | -0.075(3)       | -0.004(2)       |
| C(26) | 0.110(2)        | 0.085(2)        | 0.124(3)        | 0.043(2)        | 0.006(2)        | 0.005(2)        |

The general temperature factor expression:  $\exp(-2\pi^2(a^2U_{11}h^2 + b^2U_{22}k^2 + c^2U_{33}l^2 + 2a*b*U_{12}hk + 2a*c*U_{13}hl + 2b*c*U_{23}kl))$

Table 3. Bond lengths (Å)

| atom  | atom  | distance   | atom  | atom  | distance   |
|-------|-------|------------|-------|-------|------------|
| S(1)  | O(2)  | 1.4360(16) | S(1)  | O(3)  | 1.4294(14) |
| S(1)  | N(5)  | 1.6641(18) | S(1)  | C(15) | 1.742(2)   |
| N(4)  | N(5)  | 1.413(2)   | N(4)  | C(14) | 1.293(2)   |
| N(5)  | C(22) | 1.481(3)   | N(6)  | N(7)  | 1.386(3)   |
| N(6)  | C(12) | 1.271(3)   | N(7)  | C(9)  | 1.372(3)   |
| N(7)  | H(11) | 0.790(16)  | C(8)  | C(13) | 1.389(3)   |
| C(8)  | C(14) | 1.493(3)   | C(8)  | C(21) | 1.387(3)   |
| C(9)  | C(15) | 1.392(3)   | C(9)  | C(16) | 1.404(3)   |
| C(10) | C(14) | 1.475(3)   | C(10) | C(15) | 1.407(3)   |
| C(10) | C(20) | 1.376(3)   | C(11) | C(16) | 1.384(3)   |
| C(11) | C(20) | 1.403(3)   | C(11) | H(2)  | 1.20(2)    |
| C(12) | C(17) | 1.517(3)   | C(12) | C(23) | 1.520(4)   |
| C(13) | C(18) | 1.394(4)   | C(13) | H(4)  | 1.003(16)  |
| C(16) | H(1)  | 1.23(2)    | C(17) | C(26) | 1.496(3)   |
| C(17) | H(14) | 0.950      | C(17) | H(15) | 0.950      |
| C(18) | C(19) | 1.389(5)   | C(18) | H(5)  | 0.858(18)  |
| C(19) | C(24) | 1.359(4)   | C(19) | H(6)  | 1.13(2)    |
| C(20) | H(3)  | 0.895(17)  | C(21) | C(24) | 1.380(3)   |
| C(21) | H(7)  | 0.98(2)    | C(22) | H(8)  | 1.13(2)    |
| C(22) | H(9)  | 0.886(18)  | C(22) | H(10) | 1.16(2)    |
| C(23) | C(25) | 1.496(4)   | C(23) | H(12) | 0.758(19)  |
| C(23) | H(13) | 1.24(2)    | C(24) | H(16) | 0.950      |
| C(25) | C(26) | 1.454(5)   | C(25) | H(17) | 0.950      |
| C(25) | H(18) | 0.950      | C(26) | H(19) | 0.950      |
| C(26) | H(20) | 0.950      |       |       |            |

Table 4. Bond angles (°)

| atom  | atom  | atom  | angle      | atom  | atom  | atom  | angle      |
|-------|-------|-------|------------|-------|-------|-------|------------|
| O(2)  | S(1)  | O(3)  | 117.60(9)  | O(2)  | S(1)  | N(5)  | 111.63(9)  |
| O(2)  | S(1)  | C(15) | 109.90(9)  | O(3)  | S(1)  | N(5)  | 106.99(9)  |
| O(3)  | S(1)  | C(15) | 111.26(10) | N(5)  | S(1)  | C(15) | 97.62(9)   |
| N(5)  | N(4)  | C(14) | 116.04(17) | S(1)  | N(5)  | N(4)  | 114.25(13) |
| S(1)  | N(5)  | C(22) | 115.69(16) | N(4)  | N(5)  | C(22) | 111.12(18) |
| N(7)  | N(6)  | C(12) | 114.6(2)   | N(6)  | N(7)  | C(9)  | 120.0(2)   |
| N(6)  | N(7)  | H(11) | 122.7(12)  | C(9)  | N(7)  | H(11) | 115.8(12)  |
| C(13) | C(8)  | C(14) | 120.5(2)   | C(13) | C(8)  | C(21) | 118.7(2)   |
| C(14) | C(8)  | C(21) | 120.5(2)   | N(7)  | C(9)  | C(15) | 121.1(2)   |
| N(7)  | C(9)  | C(16) | 121.1(2)   | C(15) | C(9)  | C(16) | 117.7(2)   |
| C(14) | C(10) | C(15) | 119.92(19) | C(14) | C(10) | C(20) | 122.0(2)   |
| C(15) | C(10) | C(20) | 118.0(2)   | C(16) | C(11) | C(20) | 120.2(2)   |
| C(16) | C(11) | H(2)  | 115.1(14)  | C(20) | C(11) | H(2)  | 121.3(14)  |
| N(6)  | C(12) | C(17) | 121.2(2)   | N(6)  | C(12) | C(23) | 129.3(2)   |
| C(17) | C(12) | C(23) | 109.4(2)   | C(8)  | C(13) | C(18) | 119.0(2)   |
| C(8)  | C(13) | H(4)  | 119.5(9)   | C(18) | C(13) | H(4)  | 121.4(9)   |
| N(4)  | C(14) | C(8)  | 114.5(2)   | N(4)  | C(14) | C(10) | 125.06(19) |
| C(8)  | C(14) | C(10) | 120.44(19) | S(1)  | C(15) | C(9)  | 122.80(17) |
| S(1)  | C(15) | C(10) | 114.49(16) | C(9)  | C(15) | C(10) | 122.7(2)   |
| C(9)  | C(16) | C(11) | 120.6(2)   | C(9)  | C(16) | H(1)  | 118.4(9)   |
| C(11) | C(16) | H(1)  | 118.5(9)   | C(12) | C(17) | C(26) | 103.8(2)   |
| C(12) | C(17) | H(14) | 111.0      | C(12) | C(17) | H(15) | 110.6      |
| C(26) | C(17) | H(14) | 111.4      | C(26) | C(17) | H(15) | 110.5      |
| H(14) | C(17) | H(15) | 109.5      | C(13) | C(18) | C(19) | 121.6(3)   |
| C(13) | C(18) | H(5)  | 114.1(12)  | C(19) | C(18) | H(5)  | 123.4(12)  |
| C(18) | C(19) | C(24) | 118.6(2)   | C(18) | C(19) | H(6)  | 119.8(13)  |
| C(24) | C(19) | H(6)  | 118.0(13)  | C(10) | C(20) | C(11) | 120.8(2)   |
| C(10) | C(20) | H(3)  | 117.8(11)  | C(11) | C(20) | H(3)  | 121.4(11)  |
| C(8)  | C(21) | C(24) | 121.3(2)   | C(8)  | C(21) | H(7)  | 119.2(12)  |
| C(24) | C(21) | H(7)  | 119.2(12)  | N(5)  | C(22) | H(8)  | 102.1(14)  |
| N(5)  | C(22) | H(9)  | 112.7(11)  | N(5)  | C(22) | H(10) | 112.9(12)  |
| H(8)  | C(22) | H(9)  | 98.9(18)   | H(8)  | C(22) | H(10) | 121.5(18)  |
| H(9)  | C(22) | H(10) | 108.1(17)  | C(12) | C(23) | C(25) | 104.9(2)   |
| C(12) | C(23) | H(12) | 114.3(16)  | C(12) | C(23) | H(13) | 112.0(10)  |
| C(25) | C(23) | H(12) | 114.9(16)  | C(25) | C(23) | H(13) | 108.8(10)  |
| H(12) | C(23) | H(13) | 102.1(19)  | C(19) | C(24) | C(21) | 120.8(2)   |
| C(19) | C(24) | H(16) | 118.0      | C(21) | C(24) | H(16) | 121.2      |



Table 4. Bond angles ( $^{\circ}$ ) (continued)

| atom  | atom  | atom  | angle    | atom  | atom  | atom  | angle |
|-------|-------|-------|----------|-------|-------|-------|-------|
| C(23) | C(25) | C(26) | 108.1(2) | C(23) | C(25) | H(17) | 111.1 |
| C(23) | C(25) | H(18) | 107.5    | C(26) | C(25) | H(17) | 111.9 |
| C(26) | C(25) | H(18) | 108.6    | H(17) | C(25) | H(18) | 109.5 |
| C(17) | C(26) | C(25) | 109.7(2) | C(17) | C(26) | H(19) | 111.9 |
| C(17) | C(26) | H(20) | 108.0    | C(25) | C(26) | H(19) | 110.0 |
| C(25) | C(26) | H(20) | 107.5    | H(19) | C(26) | H(20) | 109.5 |

Table 5. Torsion Angles( $^{\circ}$ )

| atom1 | atom2 | atom3 | atom4 | angle      | atom1 | atom2 | atom3 | atom4 | angle       |
|-------|-------|-------|-------|------------|-------|-------|-------|-------|-------------|
| O(2)  | S(1)  | N(5)  | N(4)  | -51.96(16) | O(2)  | S(1)  | N(5)  | C(22) | 79.0(2)     |
| O(2)  | S(1)  | C(15) | C(9)  | -101.6(2)  | O(2)  | S(1)  | C(15) | C(10) | 75.93(18)   |
| O(3)  | S(1)  | N(5)  | N(4)  | 178.08(13) | O(3)  | S(1)  | N(5)  | C(22) | -51.0(2)    |
| O(3)  | S(1)  | C(15) | C(9)  | 30.4(2)    | O(3)  | S(1)  | C(15) | C(10) | -152.04(16) |
| N(5)  | S(1)  | C(15) | C(9)  | 142.00(19) | N(5)  | S(1)  | C(15) | C(10) | -40.42(18)  |
| C(15) | S(1)  | N(5)  | N(4)  | 63.03(15)  | C(15) | S(1)  | N(5)  | C(22) | -166.05(19) |
| N(5)  | N(4)  | C(14) | C(8)  | 176.30(18) | N(5)  | N(4)  | C(14) | C(10) | -1.1(3)     |
| C(14) | N(4)  | N(5)  | S(1)  | -46.4(2)   | C(14) | N(4)  | N(5)  | C(22) | -179.5(2)   |
| N(7)  | N(6)  | C(12) | C(17) | 176.7(2)   | N(7)  | N(6)  | C(12) | C(23) | -0.2(4)     |
| C(12) | N(6)  | N(7)  | C(9)  | 174.5(2)   | N(6)  | N(7)  | C(9)  | C(15) | 177.3(2)    |
| N(6)  | N(7)  | C(9)  | C(16) | 0.7(3)     | C(13) | C(8)  | C(14) | N(4)  | 38.4(3)     |
| C(13) | C(8)  | C(14) | C(10) | -144.0(2)  | C(14) | C(8)  | C(13) | C(18) | -173.8(2)   |
| C(13) | C(8)  | C(21) | C(24) | -0.4(4)    | C(21) | C(8)  | C(13) | C(18) | -0.3(4)     |
| C(14) | C(8)  | C(21) | C(24) | 173.1(2)   | C(21) | C(8)  | C(14) | N(4)  | -135.0(2)   |
| C(21) | C(8)  | C(14) | C(10) | 42.6(3)    | N(7)  | C(9)  | C(15) | S(1)  | 0.4(3)      |
| N(7)  | C(9)  | C(15) | C(10) | -177.0(2)  | N(7)  | C(9)  | C(16) | C(11) | 178.2(2)    |
| C(15) | C(9)  | C(16) | C(11) | 1.5(3)     | C(16) | C(9)  | C(15) | S(1)  | 177.09(18)  |
| C(16) | C(9)  | C(15) | C(10) | -0.3(3)    | C(14) | C(10) | C(15) | S(1)  | 5.0(2)      |
| C(14) | C(10) | C(15) | C(9)  | -177.4(2)  | C(15) | C(10) | C(14) | N(4)  | 22.7(3)     |
| C(15) | C(10) | C(14) | C(8)  | -154.6(2)  | C(14) | C(10) | C(20) | C(11) | 176.9(2)    |
| C(20) | C(10) | C(14) | N(4)  | -154.0(2)  | C(20) | C(10) | C(14) | C(8)  | 28.7(3)     |
| C(15) | C(10) | C(20) | C(11) | 0.1(3)     | C(20) | C(10) | C(15) | S(1)  | -178.09(19) |
| C(20) | C(10) | C(15) | C(9)  | -0.5(3)    | C(16) | C(11) | C(20) | C(10) | 1.1(4)      |
| C(20) | C(11) | C(16) | C(9)  | -1.9(4)    | N(6)  | C(12) | C(17) | C(26) | 174.4(2)    |
| N(6)  | C(12) | C(23) | C(25) | 173.3(3)   | C(17) | C(12) | C(23) | C(25) | -4.0(3)     |
| C(23) | C(12) | C(17) | C(26) | -8.1(3)    | C(8)  | C(13) | C(18) | C(19) | 1.2(4)      |
| C(12) | C(17) | C(26) | C(25) | 17.8(3)    | C(13) | C(18) | C(19) | C(24) | -1.4(5)     |
| C(18) | C(19) | C(24) | C(21) | 0.7(4)     | C(8)  | C(21) | C(24) | C(19) | 0.2(3)      |
| C(12) | C(23) | C(25) | C(26) | 15.0(3)    | C(23) | C(25) | C(26) | C(17) | -21.1(3)    |

The sign is positive if when looking from atom 2 to atom 3 a clock-wise motion of atom 1 would superimpose it on atom 4.

Table 6. Distances beyond the asymmetric unit out to 3.60 Å

| atom  | atom                 | distance  | atom  | atom                 | distance  |
|-------|----------------------|-----------|-------|----------------------|-----------|
| S(1)  | H(2) <sup>11</sup>   | 3.48(2)   | S(1)  | H(10) <sup>21</sup>  | 3.15(2)   |
| S(1)  | H(13) <sup>31</sup>  | 3.53(2)   | O(2)  | C(12) <sup>31</sup>  | 3.327(3)  |
| O(2)  | C(22) <sup>21</sup>  | 3.168(3)  | O(2)  | C(23) <sup>31</sup>  | 3.471(3)  |
| O(2)  | H(5) <sup>41</sup>   | 2.943(18) | O(2)  | H(6) <sup>41</sup>   | 3.60(2)   |
| O(2)  | H(8) <sup>21</sup>   | 3.35(2)   | O(2)  | H(9) <sup>21</sup>   | 2.796(17) |
| O(2)  | H(10) <sup>21</sup>  | 2.89(2)   | O(2)  | H(13) <sup>31</sup>  | 2.89(2)   |
| O(2)  | H(14) <sup>31</sup>  | 3.174     | O(2)  | H(18) <sup>31</sup>  | 3.200     |
| O(3)  | C(11) <sup>11</sup>  | 3.343(3)  | O(3)  | C(19) <sup>51</sup>  | 3.246(3)  |
| O(3)  | H(2) <sup>11</sup>   | 2.46(2)   | O(3)  | H(3) <sup>11</sup>   | 3.568(17) |
| O(3)  | H(6) <sup>51</sup>   | 3.05(2)   | O(3)  | H(10) <sup>21</sup>  | 2.82(2)   |
| O(3)  | H(16) <sup>51</sup>  | 3.475     | N(4)  | H(13) <sup>31</sup>  | 2.78(2)   |
| N(4)  | H(15) <sup>61</sup>  | 2.999     | N(4)  | H(16) <sup>71</sup>  | 2.882     |
| N(4)  | H(18) <sup>31</sup>  | 3.233     | N(4)  | H(20) <sup>61</sup>  | 3.377     |
| N(5)  | H(2) <sup>11</sup>   | 3.47(3)   | N(5)  | H(13) <sup>31</sup>  | 3.06(2)   |
| N(5)  | H(15) <sup>61</sup>  | 3.371     | N(5)  | H(16) <sup>71</sup>  | 3.544     |
| N(5)  | H(20) <sup>61</sup>  | 2.797     | N(6)  | H(3) <sup>11</sup>   | 3.598(17) |
| N(6)  | H(4) <sup>11</sup>   | 3.216(17) | N(6)  | H(19) <sup>81</sup>  | 3.451     |
| N(7)  | C(20) <sup>11</sup>  | 3.591(3)  | N(7)  | H(3) <sup>11</sup>   | 3.157(17) |
| N(7)  | H(6) <sup>41</sup>   | 3.41(2)   | N(7)  | H(10) <sup>21</sup>  | 2.94(2)   |
| C(8)  | H(1) <sup>61</sup>   | 3.49(2)   | C(8)  | H(18) <sup>31</sup>  | 3.172     |
| C(9)  | H(3) <sup>11</sup>   | 3.328(17) | C(9)  | H(6) <sup>41</sup>   | 3.09(2)   |
| C(10) | H(5) <sup>41</sup>   | 3.586(18) | C(10) | H(12) <sup>61</sup>  | 3.49(2)   |
| C(11) | O(3) <sup>61</sup>   | 3.343(3)  | C(11) | H(14) <sup>81</sup>  | 3.560     |
| C(11) | H(17) <sup>91</sup>  | 3.041     | C(12) | O(2) <sup>21</sup>   | 3.327(3)  |
| C(13) | C(21) <sup>71</sup>  | 3.569(4)  | C(13) | H(1) <sup>61</sup>   | 2.83(2)   |
| C(13) | H(7) <sup>71</sup>   | 2.88(2)   | C(13) | H(16) <sup>71</sup>  | 3.580     |
| C(13) | H(19) <sup>101</sup> | 3.058     | C(14) | H(15) <sup>61</sup>  | 3.509     |
| C(14) | H(18) <sup>31</sup>  | 3.314     | C(15) | H(6) <sup>41</sup>   | 3.31(2)   |
| C(16) | H(6) <sup>41</sup>   | 3.39(2)   | C(16) | H(14) <sup>81</sup>  | 3.491     |
| C(17) | H(1) <sup>111</sup>  | 3.24(2)   | C(17) | H(4) <sup>11</sup>   | 3.504(17) |
| C(17) | H(8) <sup>11</sup>   | 3.34(2)   | C(18) | H(1) <sup>61</sup>   | 2.90(2)   |
| C(18) | H(7) <sup>71</sup>   | 2.92(2)   | C(18) | H(14) <sup>101</sup> | 3.582     |
| C(18) | H(19) <sup>101</sup> | 3.118     | C(19) | O(3) <sup>91</sup>   | 3.246(3)  |
| C(20) | N(7) <sup>61</sup>   | 3.591(3)  | C(20) | H(11) <sup>61</sup>  | 3.347(17) |
| C(20) | H(12) <sup>61</sup>  | 3.43(2)   | C(20) | H(17) <sup>91</sup>  | 2.972     |
| C(21) | C(13) <sup>41</sup>  | 3.569(4)  | C(21) | H(4) <sup>41</sup>   | 3.299(17) |
| C(21) | H(5) <sup>41</sup>   | 3.366(18) | C(21) | H(18) <sup>31</sup>  | 3.201     |

Table 6. Distances beyond the asymmetric unit out to 3.60 Å (continued)

| atom  | atom                 | distance  | atom  | atom                 | distance  |
|-------|----------------------|-----------|-------|----------------------|-----------|
| C(22) | O(2) <sup>3j</sup>   | 3.168(3)  | C(22) | H(2) <sup>1j</sup>   | 3.45(2)   |
| C(22) | H(13) <sup>3j</sup>  | 2.89(2)   | C(22) | H(16) <sup>7j</sup>  | 3.076     |
| C(22) | H(20) <sup>6j</sup>  | 2.885     | C(23) | O(2) <sup>2j</sup>   | 3.471(3)  |
| C(23) | H(10) <sup>2j</sup>  | 3.16(2)   | C(23) | H(16) <sup>5j</sup>  | 3.424     |
| C(24) | H(4) <sup>4j</sup>   | 3.407(16) | C(24) | H(8) <sup>4j</sup>   | 3.58(2)   |
| C(24) | H(12) <sup>9j</sup>  | 3.48(2)   | C(24) | H(13) <sup>9j</sup>  | 3.26(2)   |
| C(25) | H(3) <sup>5j</sup>   | 3.493(17) | C(25) | H(5) <sup>12j</sup>  | 3.581(18) |
| C(25) | H(7) <sup>5j</sup>   | 3.54(2)   | C(26) | H(1) <sup>11j</sup>  | 3.18(2)   |
| C(26) | H(4) <sup>12j</sup>  | 3.407(16) | C(26) | H(5) <sup>12j</sup>  | 3.329(18) |
| C(26) | H(8) <sup>1j</sup>   | 3.03(2)   | H(1)  | C(8) <sup>1j</sup>   | 3.49(2)   |
| H(1)  | C(13) <sup>1j</sup>  | 2.83(2)   | H(1)  | C(17) <sup>8j</sup>  | 3.24(2)   |
| H(1)  | C(18) <sup>1j</sup>  | 2.90(2)   | H(1)  | C(26) <sup>8j</sup>  | 3.18(2)   |
| H(1)  | H(4) <sup>1j</sup>   | 2.88(2)   | H(1)  | H(5) <sup>1j</sup>   | 3.08(2)   |
| H(1)  | H(14) <sup>8j</sup>  | 2.813     | H(1)  | H(15) <sup>8j</sup>  | 3.328     |
| H(1)  | H(19) <sup>8j</sup>  | 2.509     | H(1)  | H(20) <sup>8j</sup>  | 3.509     |
| H(2)  | S(1) <sup>6j</sup>   | 3.48(2)   | H(2)  | O(3) <sup>6j</sup>   | 2.46(2)   |
| H(2)  | N(5) <sup>6j</sup>   | 3.47(2)   | H(2)  | C(22) <sup>6j</sup>  | 3.45(2)   |
| H(2)  | H(9) <sup>6j</sup>   | 2.78(3)   | H(2)  | H(11) <sup>6j</sup>  | 3.52(3)   |
| H(2)  | H(14) <sup>8j</sup>  | 2.980     | H(2)  | H(17) <sup>9j</sup>  | 3.058     |
| H(2)  | H(20) <sup>9j</sup>  | 3.187     | H(3)  | O(3) <sup>6j</sup>   | 3.568(17) |
| H(3)  | N(6) <sup>6j</sup>   | 3.598(17) | H(3)  | N(7) <sup>6j</sup>   | 3.157(17) |
| H(3)  | C(9) <sup>6j</sup>   | 3.328(17) | H(3)  | C(25) <sup>9j</sup>  | 3.493(17) |
| H(3)  | H(11) <sup>6j</sup>  | 3.05(2)   | H(3)  | H(12) <sup>9j</sup>  | 3.51(2)   |
| H(3)  | H(17) <sup>9j</sup>  | 2.595     | H(4)  | N(6) <sup>6j</sup>   | 3.216(17) |
| H(4)  | C(17) <sup>6j</sup>  | 3.504(17) | H(4)  | C(21) <sup>7j</sup>  | 3.299(17) |
| H(4)  | C(24) <sup>7j</sup>  | 3.407(16) | H(4)  | C(26) <sup>10j</sup> | 3.407(16) |
| H(4)  | H(1) <sup>6j</sup>   | 2.88(2)   | H(4)  | H(7) <sup>7j</sup>   | 2.86(2)   |
| H(4)  | H(15) <sup>6j</sup>  | 2.748     | H(4)  | H(16) <sup>7j</sup>  | 3.061     |
| H(4)  | H(18) <sup>10j</sup> | 3.447     | H(4)  | H(19) <sup>10j</sup> | 2.490     |
| H(5)  | O(2) <sup>7j</sup>   | 2.943(18) | H(5)  | C(10) <sup>7j</sup>  | 3.586(18) |
| H(5)  | C(21) <sup>7j</sup>  | 3.366(18) | H(5)  | C(25) <sup>10j</sup> | 3.581(18) |
| H(5)  | C(26) <sup>10j</sup> | 3.329(18) | H(5)  | H(1) <sup>6j</sup>   | 3.08(2)   |
| H(5)  | H(7) <sup>7j</sup>   | 2.71(2)   | H(5)  | H(14) <sup>10j</sup> | 3.070     |
| H(5)  | H(18) <sup>10j</sup> | 2.930     | H(5)  | H(19) <sup>10j</sup> | 2.684     |
| H(6)  | O(2) <sup>7j</sup>   | 3.60(2)   | H(6)  | O(3) <sup>9j</sup>   | 3.05(2)   |
| H(6)  | N(7) <sup>7j</sup>   | 3.41(2)   | H(6)  | C(9) <sup>7j</sup>   | 3.09(2)   |
| H(6)  | C(15) <sup>7j</sup>  | 3.31(2)   | H(6)  | C(16) <sup>7j</sup>  | 3.39(2)   |

Table 6. Distances beyond the asymmetric unit out to 3.60 Å (continued)

| atom  | atom                 | distance  | atom  | atom                 | distance  |
|-------|----------------------|-----------|-------|----------------------|-----------|
| H(6)  | H(8) <sup>4j</sup>   | 3.39(3)   | H(6)  | H(9) <sup>9j</sup>   | 3.32(3)   |
| H(6)  | H(10) <sup>9j</sup>  | 3.50(3)   | H(7)  | C(13) <sup>4j</sup>  | 2.88(2)   |
| H(7)  | C(18) <sup>4j</sup>  | 2.92(2)   | H(7)  | C(25) <sup>9j</sup>  | 3.54(2)   |
| H(7)  | H(4) <sup>4j</sup>   | 2.86(2)   | H(7)  | H(5) <sup>4j</sup>   | 2.71(2)   |
| H(7)  | H(12) <sup>9j</sup>  | 3.57(2)   | H(7)  | H(13) <sup>9j</sup>  | 3.60(2)   |
| H(7)  | H(17) <sup>9j</sup>  | 2.959     | H(7)  | H(18) <sup>9j</sup>  | 3.518     |
| H(7)  | H(18) <sup>3j</sup>  | 3.419     | H(8)  | O(2) <sup>3j</sup>   | 3.35(2)   |
| H(8)  | C(17) <sup>6j</sup>  | 3.34(2)   | H(8)  | C(24) <sup>7j</sup>  | 3.58(2)   |
| H(8)  | C(26) <sup>6j</sup>  | 3.03(2)   | H(8)  | H(6) <sup>7j</sup>   | 3.39(3)   |
| H(8)  | H(13) <sup>3j</sup>  | 3.52(3)   | H(8)  | H(14) <sup>13j</sup> | 3.566     |
| H(8)  | H(15) <sup>6j</sup>  | 2.761     | H(8)  | H(16) <sup>7j</sup>  | 2.764     |
| H(8)  | H(19) <sup>6j</sup>  | 3.313     | H(8)  | H(20) <sup>6j</sup>  | 2.248     |
| H(9)  | O(2) <sup>3j</sup>   | 2.796(17) | H(9)  | H(2) <sup>1j</sup>   | 2.78(3)   |
| H(9)  | H(6) <sup>5j</sup>   | 3.32(3)   | H(9)  | H(14) <sup>13j</sup> | 2.996     |
| H(9)  | H(20) <sup>6j</sup>  | 2.870     | H(10) | S(1) <sup>3j</sup>   | 3.15(2)   |
| H(10) | O(2) <sup>3j</sup>   | 2.89(2)   | H(10) | O(3) <sup>3j</sup>   | 2.82(2)   |
| H(10) | N(7) <sup>3j</sup>   | 2.94(2)   | H(10) | C(23) <sup>3j</sup>  | 3.16(2)   |
| H(10) | H(6) <sup>5j</sup>   | 3.50(3)   | H(10) | H(11) <sup>3j</sup>  | 2.52(3)   |
| H(10) | H(12) <sup>3j</sup>  | 3.32(3)   | H(10) | H(13) <sup>3j</sup>  | 2.05(3)   |
| H(10) | H(16) <sup>7j</sup>  | 2.843     | H(11) | C(20) <sup>1j</sup>  | 3.347(17) |
| H(11) | H(2) <sup>1j</sup>   | 3.52(3)   | H(11) | H(3) <sup>1j</sup>   | 3.05(2)   |
| H(11) | H(10) <sup>2j</sup>  | 2.52(3)   | H(12) | C(10) <sup>1j</sup>  | 3.49(2)   |
| H(12) | C(20) <sup>1j</sup>  | 3.43(2)   | H(12) | C(24) <sup>5j</sup>  | 3.48(2)   |
| H(12) | H(3) <sup>5j</sup>   | 3.51(2)   | H(12) | H(7) <sup>5j</sup>   | 3.57(2)   |
| H(12) | H(10) <sup>2j</sup>  | 3.32(3)   | H(12) | H(16) <sup>5j</sup>  | 3.234     |
| H(13) | S(1) <sup>2j</sup>   | 3.53(2)   | H(13) | O(2) <sup>2j</sup>   | 2.89(2)   |
| H(13) | N(4) <sup>2j</sup>   | 2.78(2)   | H(13) | N(5) <sup>2j</sup>   | 3.06(2)   |
| H(13) | C(22) <sup>2j</sup>  | 2.89(2)   | H(13) | C(24) <sup>5j</sup>  | 3.26(2)   |
| H(13) | H(7) <sup>5j</sup>   | 3.60(2)   | H(13) | H(8) <sup>2j</sup>   | 3.52(3)   |
| H(13) | H(10) <sup>2j</sup>  | 2.05(3)   | H(13) | H(16) <sup>5j</sup>  | 2.610     |
| H(14) | O(2) <sup>2j</sup>   | 3.174     | H(14) | C(11) <sup>11j</sup> | 3.560     |
| H(14) | C(16) <sup>11j</sup> | 3.491     | H(14) | C(18) <sup>12j</sup> | 3.582     |
| H(14) | H(1) <sup>11j</sup>  | 2.813     | H(14) | H(2) <sup>11j</sup>  | 2.980     |
| H(14) | H(5) <sup>12j</sup>  | 3.070     | H(14) | H(8) <sup>14j</sup>  | 3.566     |
| H(14) | H(9) <sup>14j</sup>  | 2.996     | H(15) | N(4) <sup>1j</sup>   | 2.999     |
| H(15) | N(5) <sup>1j</sup>   | 3.371     | H(15) | C(14) <sup>1j</sup>  | 3.509     |
| H(15) | H(1) <sup>11j</sup>  | 3.328     | H(15) | H(4) <sup>1j</sup>   | 2.748     |

Table 6. Distances beyond the asymmetric unit out to 3.60 Å (continued)

| atom  | atom                | distance | atom  | atom                | distance |
|-------|---------------------|----------|-------|---------------------|----------|
| H(15) | H(8) <sup>11</sup>  | 2.761    | H(15) | H(19) <sup>8</sup>  | 3.561    |
| H(16) | O(3) <sup>9</sup>   | 3.475    | H(16) | N(4) <sup>4</sup>   | 2.882    |
| H(16) | N(5) <sup>4</sup>   | 3.544    | H(16) | C(13) <sup>4</sup>  | 3.580    |
| H(16) | C(22) <sup>4</sup>  | 3.076    | H(16) | C(23) <sup>9</sup>  | 3.424    |
| H(16) | H(4) <sup>4</sup>   | 3.061    | H(16) | H(8) <sup>4</sup>   | 2.764    |
| H(16) | H(10) <sup>4</sup>  | 2.843    | H(16) | H(12) <sup>9</sup>  | 3.234    |
| H(16) | H(13) <sup>9</sup>  | 2.610    | H(17) | C(11) <sup>5</sup>  | 3.041    |
| H(17) | C(20) <sup>5</sup>  | 2.972    | H(17) | H(2) <sup>5</sup>   | 3.058    |
| H(17) | H(3) <sup>5</sup>   | 2.595    | H(17) | H(7) <sup>5</sup>   | 2.959    |
| H(18) | O(2) <sup>2</sup>   | 3.200    | H(18) | N(4) <sup>2</sup>   | 3.233    |
| H(18) | C(8) <sup>2</sup>   | 3.172    | H(18) | C(14) <sup>2</sup>  | 3.314    |
| H(18) | C(21) <sup>2</sup>  | 3.201    | H(18) | H(4) <sup>12</sup>  | 3.447    |
| H(18) | H(5) <sup>12</sup>  | 2.930    | H(18) | H(7) <sup>5</sup>   | 3.518    |
| H(18) | H(7) <sup>2</sup>   | 3.419    | H(19) | N(6) <sup>11</sup>  | 3.451    |
| H(19) | C(13) <sup>12</sup> | 3.058    | H(19) | C(18) <sup>12</sup> | 3.118    |
| H(19) | H(1) <sup>11</sup>  | 2.509    | H(19) | H(4) <sup>12</sup>  | 2.490    |
| H(19) | H(5) <sup>12</sup>  | 2.684    | H(19) | H(8) <sup>11</sup>  | 3.313    |
| H(19) | H(15) <sup>11</sup> | 3.561    | H(20) | N(4) <sup>11</sup>  | 3.377    |
| H(20) | N(5) <sup>11</sup>  | 2.797    | H(20) | C(22) <sup>11</sup> | 2.885    |
| H(20) | H(1) <sup>11</sup>  | 3.509    | H(20) | H(2) <sup>5</sup>   | 3.187    |
| H(20) | H(8) <sup>11</sup>  | 2.248    | H(20) | H(9) <sup>11</sup>  | 2.870    |

Symmetry Operators:

- |                          |                       |
|--------------------------|-----------------------|
| (1) -X,Y+1/2-1,-Z+1/2    | (2) X+1/2,-Y+1/2+1,-Z |
| (3) X+1/2-1,-Y+1/2+1,-Z  | (4) X+1/2,-Y+1/2+2,-Z |
| (5) X,Y-1,Z              | (6) -X,Y+1/2,-Z+1/2   |
| (7) X+1/2-1,-Y+1/2+2,-Z  | (8) -X+1,Y+1/2,-Z+1/2 |
| (9) X,Y+1,Z              | (10) X-1,Y+1,Z        |
| (11) -X+1,Y+1/2-1,-Z+1/2 | (12) X+1,Y-1,Z        |
| (13) X-1,Y,Z             | (14) X+1,Y,Z          |

Table 7. Intramolecular and Intermolecular Hydrogen bonds

| D    | H     | A    | D...A    | D-H       | H...A     | D-H...A   |
|------|-------|------|----------|-----------|-----------|-----------|
| N(7) | H(11) | O(3) | 2.801(2) | 0.790(16) | 2.130(17) | 142.9(16) |

- Note) 1. The symmetry operations are applied to the acceptors.  
 2. Estimated standard deviations (esd's) are shown in the parentheses.  
 They are not calculated when all atoms have an esd=0.0.
